# Supplementary material for: Genome-wide association study reveals influence of cell-specific gene networks on Soybean root system architecture
Source: Research Square preprint supplement (doi:10.21203/rs.3.rs-6719211/v1), 2025-06-10
Supplement: Supplementary file 1 [file 9f56a9e583634c88fa8b5bb6.xlsx]

## Sheet: S1
Supplemental Table 1. Quantified traits used to measure root system architecture along with their associated units and corresponding trait descriptions.
Features	Type	Unit	Trait Description
Dry root biomass	Physical Mass	g	Dry root weight measured after 72 hrs. of drying in oven
Width	Image Based	cm	The maximum width of the root in the segmented image
Depth	Image Based	cm	The maximum depth of the root in the segmented image
Convex hull area	Image Based	cm2	The area of the smallest convex polygon to enclose the root system
Biomass area	Image Based	pixels	The total number of pixels of roots in the segmented image
Total root length	Image Based	cm	Computed by determining the total Euclidean distance of medial axis pixels in the skeletonized image
PR length	Image Based	cm	Computed by determining the total Euclidean distance of medial axis pixels of primary root in the skeletonized image
LR length	Image Based	cm	Computed by determining the total Euclidean distance of medial axis pixels of lateral roots in the skeletonized image
LR tip depth	Image Based	cm	The average depth of tips of lateral roots in vertical direction in the segmented image
PR tip depth	Image Based	cm	The average depth of tips of primary root in vertical direction in the segmented image
all tip depth	Image Based	cm	The average depth of all the tips, including primary and lateral roots in vertical direction in the segmented image
Vertical angles	Image Based	degree	The average vertical angles of straight lines of lateral roots detected by Hough Transform
SDx	compound	dimensionless	Standard deviation of horizontal pixel densities from image analysis
SDy	compound	dimensionless	Standard deviation of vertical pixel densities from image analysis
SDx/SDy	compound	dimensionless	Ratio of SDx to SDy
PR = primary root, LR = Lateral root

## Sheet: S2
Supplementary Table S2. Trait Measurements for 371 Soybean Accessions.
PI#	VCF SEQ ID	Dry_root_mass	Width	Height	SDx	SDy	SDx_SDy	Convex_hull_area	Biomass_area	total_root_length	pr_length	lr_length	lr_tip_depth	pr_tip_depth	all_tip_depth	Vertical_angles
PI468915	HN010	0.017	1.25022	4.67804	0.370512	1.22546	0.285674	2.29433	0.769881	5.74543	4.61369	1.13174	1.53578	4.70235	2.44182	37.9881
PI437169B	HN054	0.0245	3.8072	4.95206	0.843179	1.03217	0.853396	7.79151	1.70189	19.744	5.00965	14.4253	2.0159	4.97624	2.23305	45.8514
PI438258	HN057	0.0265	1.96931	3.79924	0.40672	0.922118	0.531072	3.54555	1.04104	7.03554	3.82468	3.6095	1.79125	3.97301	2.13151	58.7163
PI467312	HN060	0.017	3.06207	4.89532	0.609934	1.00057	0.618096	8.61362	2.00776	16.724	5.26317	11.3307	2.43987	4.54003	2.59916	50.5546
PI475783B	HN062	0.015	4.20765	4.79695	0.908596	0.976709	0.986121	11.606	1.93693	19.6439	4.89578	14.9096	2.592	4.68549	2.71722	33.1452
PI518751	HN064	0.0125	1.69993	4.9579	0.366097	1.25335	0.292954	5.00059	1.14231	9.07125	5.03017	3.87127	1.76366	4.84894	2.03409	44.9826
PI548511	HN070	0.019	4.75841	4.75386	1.02826	0.924989	0.918811	12.561	2.16528	21.7434	4.7713	13.9374	2.11349	4.8992	2.24361	45.9477
PI404188A	PI404188A	0.019	2.54436	4.05445	0.679953	0.882648	0.840289	4.81923	1.34164	9.21755	4.28373	4.82472	1.83141	4.20845	2.14312	55.4373
PI507681B	PI507681B	0.025	3.43628	3.51257	0.757494	0.884197	0.969585	3.94731	1.11679	8.41353	3.81327	4.32978	1.36566	3.74887	1.75474	37.8485
U03-100612	U03-100612	0.02	3.74523	5.00514	0.744566	0.98199	0.781628	10.1642	1.79259	17.5859	5.16417	12.4962	2.1138	4.92826	2.28862	53.5453
LG94-1128	LG94-1128	0.0155	4.01674	4.63178	0.925957	1.10641	0.949824	5.51693	1.63231	16.1125	4.69623	10.2163	1.67541	4.56977	1.84446	36.6388
LG94-1906	LG94-1906	0.014	2.52344	4.6734	0.603534	1.03355	0.642077	6.40676	1.29067	10.9294	5.30163	5.84392	1.95818	4.60654	2.24904	39.1879
PI266806C	USB-007	0.0145	3.3462	3.48751	0.768553	0.817971	0.882566	4.88984	1.55943	10.7127	4.5391	6.17364	1.82515	3.82249	1.99416	39.5183
PI603426G	USB-049	0.023	5.01926	4.91562	1.1585	0.999883	1.08186	12.679	2.39393	25.1524	5.14563	19.7987	2.04887	4.85197	2.1917	46.3547
PI054608_1	USB-062	0.018	5.01226	4.93526	1.15396	1.02769	1.18982	15.071	2.25676	21.8114	4.97679	16.8346	2.70582	5.05018	2.87031	38.4805
PI084637	USB-078	0.035	3.56531	3.5378	0.765346	0.703503	1.11254	6.76125	1.88603	13.0631	3.78529	9.27779	1.93023	4.00629	2.02814	47.99
PI088468	USB-088	0.026	3.62062	4.30475	0.866835	0.961162	0.921189	8.99679	2.18905	17.3285	5.72887	12.1877	2.65775	4.52773	2.84174	21.228
PI089005_5	USB-089	0.016	3.31399	4.52014	0.727614	1.02024	0.714856	4.24785	1.85318	15.554	5.43908	7.73143	1.73145	4.87965	1.94687	18.6813
PI291309D	USB-123	0.011	2.63508	4.83449	0.543924	1.01258	0.547778	6.27096	1.28469	15.1756	4.75908	11.6367	2.19181	4.9671	2.3677	33.2306
PI291310C	USB-124	0.02	3.08794	4.874	0.727638	1.14385	0.610208	5.99175	1.25876	16.6992	4.93012	14.5255	1.99485	5.07335	2.30563	54.7738
PI361080	USB-133	0.014	5.05363	4.94292	1.00799	0.842115	1.19858	13.7395	2.31422	28.0247	4.99145	22.8792	2.65251	4.8157	2.75593	45.0399
PI391583	USB-145	0.014	4.1071	4.51505	0.874112	0.972735	0.915562	9.07563	1.57211	15.3251	4.64164	10.6187	1.86721	4.46508	2.01231	42.4449
PI417242	USB-155	0.014	2.58059	4.00605	0.637659	0.923591	0.835662	4.11063	1.02844	7.17418	4.0822	3.09198	1.44592	4.34844	1.76633	59.4167
PI437112A	USB-170	0.018	3.65862	4.49845	0.83656	0.829057	1.03388	7.79064	1.98484	16.8724	4.8542	11.9454	1.92302	4.34869	2.04992	39.1789
PI437485	USB-178	0.024	2.86593	4.50371	0.689905	1.10591	0.71746	5.33135	1.29944	11.3837	4.77669	6.67827	1.77204	4.85859	2.02833	33.1811
PI437662	USB-182	0.006	3.02508	4.81882	0.576085	1.12395	0.512671	7.67769	0.907182	11.9644	3.74679	8.21756	2.21989	5.12642	2.40724	48.9657
PI437788A	USB-186	0.016	4.01665	4.92523	0.794396	0.9998	0.859516	10.6978	1.7903	17.0866	5.45619	11.1972	2.38689	4.73482	2.49235	54.4922
PI437793	USB-187	0.013	4.30446	4.67925	1.05198	0.859032	1.43687	10.056	1.64757	20.8834	3.89318	16.6736	2.0326	4.92279	2.23395	31.1507
PI437814A	USB-188	0.019	2.8292	4.96196	0.622374	1.12678	0.628231	8.15829	1.62895	14.4967	5.04183	9.45489	2.31093	4.84468	2.42372	45.0221
PI437838	USB-189	0.035	4.47844	4.70567	1.04352	0.94221	1.11984	11.7519	2.45641	21.7981	3.90923	16.6792	2.04977	4.97679	2.14373	28.7113
PI437956B	USB-191	0.015	4.01303	4.77551	0.916699	0.975461	0.940601	10.057	2.20645	21.5253	4.92573	16.5973	3.00897	5.15119	3.35325	27.8232
PI438019B	USB-193	0.024	2.88017	4.90088	0.659955	1.14317	0.604145	7.31269	1.79081	15.5743	6.37134	9.20298	1.71038	5.08598	1.87389	48.959
PI438083	USB-195	0.018	3.23479	4.92132	0.713184	1.0139	0.726155	8.23715	1.54591	14.0028	5.15448	8.80211	2.09637	4.73002	2.30582	44.2846
PI458505	USB-210	0.012	2.28931	3.42572	0.64683	0.898076	0.874667	2.42833	1.00649	5.27201	3.66167	1.66087	1.58161	3.66045	1.79175	45.546
PI467347	USB-216	0.0175	4.0969	4.89973	0.86315	0.927667	0.929548	11.8953	2.53205	23.2388	5.08565	18.1532	3.13213	4.91213	3.23711	44.1873
PI475820	USB-218	0.027	5.09828	4.74569	1.13399	0.910368	1.19589	12.7294	3.12983	28.1064	5.73776	21.4106	2.34227	4.95901	2.46799	53.1074
PI548356	USB-256	0.0305	3.12703	3.77872	0.769257	0.752741	1.11329	6.47497	1.8778	12.7868	4.90505	8.02635	2.34984	4.04879	2.48792	31.982
PI548411	USB-260	0.018	4.55835	4.7884	0.967311	0.954683	1.02887	13.3004	2.8455	28.7222	4.90935	23.8129	3.19916	5.13363	3.28186	28.1812
PI548521	USB-265	0.0095	3.05514	1.50239	0.753853	0.456073	1.08322	2.03777	0.763675	3.81554	3.41722	0.398317	1.1259	2.08241	1.34807	46.6135
PI567262A	USB-297	0.017	4.38829	4.90265	0.893282	0.929991	0.956588	12.6284	2.16303	22.795	4.94709	17.8479	2.31066	5.01336	2.52155	51.5441
PI567418A	USB-311	0.014	2.2729	2.28937	0.574358	0.581609	1.20358	2.62117	1.00127	4.79818	3.85548	1.43246	1.21906	2.56945	1.34986	30.3868
PI567525	USB-317	0.012	3.91605	2.67316	0.987427	0.589899	1.85263	4.51444	1.49723	10.5202	1.86501	5.44684	1.51757	2.85161	1.6397	44.5327
PI578412	USB-332	0.023	4.51812	4.60145	0.999453	0.98656	1.01485	12.3339	2.63018	25.8184	4.79363	19.48	2.12116	4.45704	2.23275	23.3599
PI578493	USB-333	0.019	4.83723	4.62634	1.1246	0.945557	1.21709	12.2434	2.33344	25.819	4.81229	21.2387	2.32316	4.84915	2.45547	32.7393
PI578499A	USB-334	0.022	2.94024	4.96247	0.647547	0.95516	0.598728	6.50173	1.37459	12.1806	4.86726	7.31336	2.04493	4.60878	2.21881	53.8288
PI578504	USB-336	0.0165	4.03089	4.8502	0.824922	0.981346	0.887505	10.6202	1.92192	21.6544	5.14226	16.4875	2.3959	4.75487	2.52119	44.8733
PI597464	USB-361	0.024	5.07284	5.03307	1.11778	0.926089	1.20734	17.0687	2.79104	34.4346	5.20739	29.2272	2.78117	5.09812	2.89079	47.8546
PI603345	USB-370	0.007	2.63845	3.49748	0.680565	0.860365	1.06971	2.72763	0.886055	5.9794	4.02453	2.12017	1.61548	3.73525	1.81722	51.5053
PI603389	USB-371	0.012	2.27979	2.65463	0.579188	0.646096	0.900696	1.09018	0.558479	5.61745	2.83653	2.78092	1.00814	2.94766	1.19363	24.856
PI612730	USB-392	0.01	3.01447	3.67223	0.817046	0.909883	0.947852	3.6028	0.922985	8.84057	3.58006	5.76245	1.14525	3.57922	1.87743	25.4359
PI639550E	USB-404	0.023	4.30142	4.45603	1.06569	1.10308	0.969852	5.69355	1.30112	19.1946	1.55387	17.6407	2.13494	5.02254	2.23261	22.2192
PI639559B	USB-405	0.007	3.72556	4.89144	0.686793	1.10362	0.705334	9.16023	1.25975	18.2824	4.51821	13.7642	1.63551	4.87215	1.78007	47.5247
PI054873	USB-416	0.02	4.75706	4.99676	1.05617	0.871153	1.15422	13.4198	3.1078	27.4075	4.99373	22.516	2.91803	5.02043	3.02249	52.0518
PI068436	USB-422	0.011	2.02338	4.54497	0.483131	0.941654	0.664251	4.19739	1.06979	9.03911	4.5787	4.46041	1.77367	4.81149	2.04285	56.6857
PI068736	USB-426	0.022	2.49059	3.09046	0.516557	0.68994	0.707002	2.21336	1.34316	12.2331	3.14683	9.88264	1.93144	3.80492	2.02139	28.1219
PI068765	USB-427	0.008	1.98186	4.47434	0.560111	1.09942	0.481042	2.05278	0.963511	5.13797	4.54475	0.593221	1.96749	4.71249	2.74013	26.1247
PI068815	USB-428	0.019	3.59514	4.97325	0.791227	0.905091	0.953602	9.44591	1.88487	16.8555	4.96803	11.8874	2.31879	4.72901	2.47863	35.5241
PI070078	USB-429	0.0205	3.39596	4.24872	0.737144	0.807826	0.952412	6.75832	2.07453	16.955	5.04386	11.8532	2.19625	4.4832	2.31176	39.3818
PI080671	USB-439	0.032	4.78916	4.11893	1.03301	0.864614	1.1404	9.93171	2.9744	20.9512	4.83558	16.1156	2.15007	4.26309	2.2773	40.986
PI088508	USB-456	0.01	1.73609	3.04301	0.509713	0.711099	0.616856	2.67989	1.13383	7.48103	3.65833	3.8227	1.92146	3.63928	2.1605	24.3276
PI091120	USB-469	0.0235	4.97098	4.07533	1.08515	0.868678	1.17407	11.8121	2.55073	24.6918	5.03299	20.2979	1.59994	4.19228	1.75291	49.2277
PI437347	USB-555	0.0115	2.19644	4.39795	0.500774	0.99708	0.533667	3.67329	1.11179	8.05222	4.40329	3.31019	1.91633	4.62453	2.25703	41.7866
PI437477B	USB-561	0.02	3.64181	3.92456	0.940096	1.06825	1.13109	3.32454	1.03594	8.9819	4.06813	5.03425	1.02536	3.66161	1.41733	62.8411
PI438329	USB-586	0.006	2.51611	3.59193	0.736412	0.889582	1.14794	2.59699	1.06305	7.06188	3.19433	1.3496	1.14468	3.76163	1.52441	22.4102
PI438450	USB-589	0.015	4.9291	4.58182	0.972839	0.871183	1.05486	13.4794	1.73726	19.5964	4.54685	14.5548	2.22788	4.19341	2.3583	51.9857
PI438504B	USB-591	0.013	3.32814	4.67736	0.777534	0.874206	1.28006	8.66159	1.58536	13.3355	4.46656	8.33012	2.94628	4.74451	3.04097	46.2435
PI464913	USB-593	0.0245	4.60027	4.82956	0.938609	0.911683	1.04805	12.038	2.85787	24.7214	4.99343	19.4379	2.70826	4.95303	2.83309	36.3432
PI476344	USB-599	0.009	1.75879	4.52798	0.376306	0.959564	0.399575	2.69727	0.831869	5.93441	4.51846	1.98684	1.78918	4.62428	2.1082	58.7093
PI518711	USB-611	0.018	3.29313	4.51854	0.849222	1.11169	0.680682	3.4908	1.1013	10.3778	4.99297	6.52042	1.49268	4.46765	1.84639	35.0833
PI574478C	USB-705	0.025	3.69506	4.06803	0.931169	0.830465	0.86972	5.38989	1.39533	10.7207	4.56227	9.01206	1.90302	3.85202	2.10058	27.0451
PI592936	USB-735	0.015	3.46882	2.77098	0.951829	0.582491	1.62985	4.44588	1.39041	12.4008	3.46631	9.08899	1.53081	2.98582	1.62598	46.1456
PI603412A	USB-772	0.012	2.35696	2.78524	0.698258	0.775988	1.05581	2.08485	0.967677	6.29391	3.71427	2.98987	1.5853	3.08853	1.79419	62.6569
PI603446	USB-776	0.0075	1.75388	2.15956	0.455776	0.463381	1.09809	1.35471	0.72246	3.67374	2.30196	1.14794	1.08655	2.27692	1.1808	46.0513
PI653874B	USB-818	0.0105	4.06232	4.74758	0.82313	0.945509	0.842557	10.554	1.62288	20.3892	4.80643	15.5519	2.99073	4.99844	3.076	33.9823
PI417091	HN106	0.01	2.31998	4.81418	0.42303	1.19444	0.471936	5.90817	1.34115	12.4279	5.28516	7.1286	1.29993	5.00679	1.51327	47.8425
PI407788A	HN006	0.019	3.99382	4.8585	0.931516	0.973149	0.814866	9.72486	2.41506	20.3693	5.10115	15.8176	2.53223	4.74493	2.65137	29.1377
PI437655	HN008	0.019	4.12454	4.862	0.824917	1.00428	0.865001	9.09686	1.75911	15.9177	5.0867	10.5168	2.12879	4.44457	2.28144	41.9408
S05-11482	HN013	0.02	3.39866	3.85253	0.780415	0.791389	1.0603	6.83118	2.06996	15.2069	4.6461	10.1236	2.0071	3.95633	2.14467	35.4378
PI437654	HN015	0.016	4.45283	4.94027	0.981197	1.02338	1.01593	13.3808	2.37559	23.8107	4.9955	18.6487	3.0568	5.02633	3.20092	45.9071
PI088788	HN020	0.016	1.65227	4.88479	0.450502	1.20854	0.371081	4.09898	1.03731	7.75215	4.99491	2.48545	1.87248	4.8692	2.20043	25.4716
PI548316	HN024	0.021	2.23463	3.80712	0.518587	0.948316	0.973608	3.23637	0.922732	7.0066	4.82994	5.86835	1.38361	3.96382	1.55784	23.1428
PI612611	HN026	0.021	2.30018	5.03493	0.580917	1.13969	0.575263	4.54382	1.28599	8.30906	5.18683	3.2358	2.1205	4.68924	2.42872	52.2848
PI598124	HN030	0.017	3.00336	4.6675	0.816151	0.940211	1.01542	4.59392	1.25858	9.53847	4.89203	5.28086	1.52584	4.91647	1.98839	40.2267
PI087617	HN033	0.025	3.42978	3.89397	0.691691	0.731921	0.981617	6.75768	1.66739	12.5609	4.08085	8.48001	1.75826	4.09501	1.91286	72.5275
PI087631-1	HN034	0.018	5.1394	5.03189	1.08701	1.05302	1.03268	16.1342	2.65514	29.1215	5.11025	24.0113	2.73114	4.2058	2.82951	31.8484
PI200471	HN036	0.0225	2.37744	4.25083	0.567712	0.914821	0.877546	4.35334	1.58527	11.7646	4.33247	7.58373	1.82706	4.39815	2.04469	27.3051
PI464920B	HN059	0.017	1.71333	3.48142	0.457757	0.780958	0.564055	2.03972	0.806472	4.9393	3.36281	1.57649	1.68542	3.66422	1.87487	44.8743
PI542044	HN065	0.011	4.52806	4.20428	0.915735	0.794909	1.15298	10.5871	1.76131	19.8458	4.81494	15.6119	2.08943	4.38719	2.23226	55.4271
PI547862	HN066	0.019	3.35973	3.34408	0.733486	0.72854	0.986344	6.14031	1.43015	12.4511	3.68512	8.6403	1.84796	3.44875	2.00821	55.6876
PI548317	HN067	0.02	4.27573	4.93035	1.00173	1.06041	0.945369	10.2192	1.44055	18.6095	5.07444	14.1334	2.54208	5.15684	2.73855	44.2786
PI548349	HN068	0.025	3.86007	4.88647	0.787268	1.02561	0.750869	11.0884	2.34132	20.1759	5.16977	14.8752	2.32793	4.67104	2.45092	49.6142
PI552538	HN073	0.022	4.27337	4.97654	1.07193	1.02228	0.859587	9.88864	2.51834	22.9599	5.08885	12.0376	2.31386	5.11867	2.43272	42.2975
PI567357	HN079	0.025	4.85244	5.05338	0.989863	0.924826	1.0875	12.7429	2.11611	20.2039	5.50725	14.296	2.19052	4.07639	2.29063	64.6169
PI567690	HN084	0.011	2.98818	4.8831	0.640002	1.07135	0.646348	7.01467	1.30307	13.0854	5.01622	9.43648	2.31059	4.83403	2.51	37.8555
PI567731	HN086	0.016	4.52027	4.94368	0.900436	0.928168	0.973102	13.2234	2.37422	26.5771	5.08569	21.5864	2.64518	4.89435	2.75389	46.5968
PI591539	HN087	0.0125	1.2073	2.89336	0.31009	0.749517	0.436417	1.59941	0.630684	4.10358	2.99033	1.11325	1.27518	3.22373	1.84548	70.4454
PI593258	HN088	0.027	2.8214	4.54362	0.573151	0.966744	0.779233	6.18395	1.73772	14.2288	5.01176	8.16166	1.70233	4.3553	1.91098	61.1058
PI597387	HN092	0.022	2.8693	2.45057	0.889836	0.570268	1.07741	2.71926	0.815798	5.38457	3.31984	3.17042	1.06176	2.83863	1.3221	42.9371
PI603497	HN097	0.0115	2.34432	4.80767	0.576862	1.08289	0.649595	4.67392	1.33565	11.4665	4.80289	7.2827	2.90617	4.99651	3.0711	20.9624
PI417015	HN107	0.022	4.07786	5.00064	0.836861	0.843094	0.9477	11.6976	2.34909	21.4528	5.08346	15.9226	2.86679	4.54698	2.95802	40.0148
PI561370	PI561370	0.013	4.11875	4.36268	0.964536	0.882508	1.24624	8.89396	1.85201	18.2622	4.69446	13.1565	1.81389	4.10865	2.0864	63.1734
PI574486	PI574486	0.014	2.68416	3.61544	0.695976	0.901718	1.27149	2.30241	0.905303	7.00913	4.01101	2.99812	1.43872	3.64063	1.79097	54.9051
HS6-3976	HS6-3976	0.018	3.6748	4.16847	0.756414	0.827117	0.866014	7.6474	1.64646	13.4013	4.40434	8.99698	1.78052	4.2232	1.98093	63.4658
LD02-4485	LD02-4485	0.022	4.50553	4.423	0.989607	0.849199	1.09329	9.27312	2.06112	20.3815	4.37194	16.0126	2.16089	4.59892	2.27753	62.774
Prohio	Prohio	0.018	3.58252	4.14177	0.717054	0.838557	0.937482	2.29888	1.3409	11.7216	4.74619	2.95136	1.82167	4.59344	2.09585	59.7567
LG00-3372	LG00-3372	0.025	4.07453	4.90788	0.791894	0.981051	0.750615	12.2789	1.98014	19.5901	5.25095	14.3392	2.17011	4.80188	2.34381	53.7604
LG04-4717	LG04-4717	0.025	3.24995	5.01291	0.849863	1.21852	0.705639	6.39859	1.72494	16.5187	5.14648	13.2328	1.75811	5.13232	1.99821	40.0785
LG05-4464	LG05-4464	0.0215	3.34874	3.74919	0.832929	0.825067	0.980041	8.31792	2.20323	18.5353	3.43876	14.6332	1.95757	4.11994	2.11216	23.621
LG05-4832	LG05-4832	0.021	4.80049	4.83866	1.04598	0.978584	1.04916	12.471	2.35398	18.6928	5.63607	11.5696	2.16267	4.95851	2.40116	40.4402
LG90-2550	LG90-2550	0.016	3.69784	3.84954	0.813828	0.790935	1.11931	6.62278	1.42406	12.1003	4.95135	7.66133	1.90069	3.53351	2.06875	44.9954
LG98-1605	LG98-1605	0.0175	3.31432	4.10069	0.782465	0.963501	0.815202	5.6267	1.42174	14	3.74991	10.5803	1.4195	4.21216	1.604	41.3519
PI548313	USB-023	0.009	2.16411	4.86195	0.53531	1.11781	0.448956	5.31809	1.11822	9.33045	5.08792	4.22383	2.21389	4.50312	2.33679	64.3515
PI549041A	USB-037	0.008	3.42895	4.62757	0.804816	1.01778	0.975904	9.20219	1.36864	16.5294	2.43085	13.2328	2.30126	4.76157	2.4753	21.7646
PI567558	USB-041	0.028	2.80231	4.37354	0.791397	0.947891	1.07751	6.34749	1.44715	10.533	4.46715	6.06584	1.71513	4.62167	1.9374	38.993
PI603442	USB-050	0.0195	4.21549	5.02536	0.89904	0.999131	0.86986	12.0909	2.34097	20.9203	5.20086	14.7347	2.58011	5.12722	2.72835	35.0103
PI054591	USB-061	0.016	3.31487	4.21839	0.745831	0.822104	1.0716	7.60323	1.5213	14.4848	4.93749	9.47406	1.67462	4.44002	1.84046	57.826
PI068604_1	USB-068	0.022	4.01749	4.62858	0.886745	1.10231	0.807734	9.81442	2.35867	23.7453	4.58552	19.1598	2.00964	5.07697	2.26156	39.1755
PI068732_1	USB-069	0.025	4.45822	4.65459	0.935468	1.12037	1.04344	5.87638	1.09464	15.6726	4.72724	15.4415	1.34747	4.78183	1.65996	54.2151
PI081041	USB-074	0.02	4.54264	4.5284	1.00953	0.838551	1.18568	11.346	2.38959	20.4805	5.07907	14.2637	2.34756	4.91445	2.48463	39.5083
PI087620	USB-086	0.0175	2.43031	4.93285	0.602454	1.04949	0.608217	6.24107	1.49543	11.1302	5.15553	6.25305	2.01049	4.72976	2.17517	52.6015
PI090486	USB-092	0.021	3.31348	4.92826	0.790514	1.06814	1.10379	8.89882	2.60145	22.01	4.11944	17.8906	2.66628	5.16493	2.8482	22.2894
PI103088	USB-100	0.023	4.54331	4.94705	1.03768	1.08501	1.0739	11.495	2.61742	32.1792	5.08581	27.2447	1.92983	5.11505	2.0746	25.3453
PI153231	USB-102	0.023	3.79583	4.60103	0.971399	0.955062	1.07817	8.11187	2.64102	24.5314	4.57162	14.7247	2.21898	4.92708	2.40279	22.9677
PI209334	USB-116	0.003	1.10514	0.953822	0.34387	0.283038	1.24751	1.0048	0.489265	2.19441	1.83639	0.358023	1.12951	1.42279	1.21504	NA
PI253661B	USB-119	0.018	2.6173	2.75817	0.744489	0.629696	1.24517	4.71501	1.15357	12.4656	1.32436	9.64665	1.21802	2.90764	1.32173	22.7981
PI437110A	USB-169	0.011	3.13588	4.96539	0.607095	1.01067	0.595661	7.81913	1.49908	15.3663	4.9607	10.3545	2.42431	4.83571	2.58428	48.5372
PI437685D	USB-183	0.022	5.01441	5.01585	0.967825	1.04141	1.02234	15.2601	2.84538	32.0626	5.02423	27.0165	2.97982	4.93702	3.0445	39.1483
PI437776	USB-185	0.006	3.78293	4.77197	0.851115	1.00523	0.799601	11.7989	1.5294	18.3042	4.80433	13.8185	2.54503	4.98286	2.6896	37.3201
PI438496B	USB-206	0.0125	3.36926	4.93812	0.700607	1.07061	0.641519	8.93414	1.96869	17.9184	6.04499	12.2351	2.40172	5.15275	2.6455	18.0163
PI438500	USB-208	0.0245	4.95038	4.75921	1.12328	1.07932	1.03921	12.5747	2.7989	27.2424	4.84936	22.0854	2.46556	5.11821	2.6075	27.4248
PI468408B	USB-217	0.02	3.97579	4.9548	0.803965	1.02765	0.877951	11.2356	2.13297	18.1465	5.46402	13.0155	3.03577	4.97098	3.16996	38.6001
PI479735	USB-221	0.0275	3.25265	4.57743	0.856666	0.918025	1.0017	5.82423	2.14684	15.9994	4.79603	9.54879	2.07042	4.85715	2.27956	31.5577
PI490766	USB-222	0.016	3.16127	2.89887	0.706336	0.608096	1.16615	2.20988	1.15065	9.43998	3.27472	6.16526	1.38491	3.30514	1.51479	57.5446
PI507471	USB-236	0.021	4.40986	4.67062	0.958563	0.933752	1.10089	9.22705	2.27301	24.0684	4.9112	19.4544	2.11144	5.01445	2.26734	32.2902
PI538386A	USB-245	0.015	3.07926	4.82758	0.619042	0.965634	0.642341	8.40623	1.75954	16.6807	4.80795	11.5595	2.97186	4.88327	3.08144	46.9353
PI556511	USB-282	0.022	3.89406	4.61063	0.814584	0.922737	0.877065	3.61788	1.57093	16.9788	5.36595	8.91189	1.76575	5.08278	2.08841	49.1792
PI567361	USB-304	0.0115	2.9004	4.17585	0.750117	0.981073	0.636398	3.47423	0.922153	7.7864	4.43673	3.14506	1.3087	4.24868	1.66305	53.9853
PI567435B	USB-313	0.018	3.01927	4.49453	0.77742	1.10961	0.705851	3.10841	1.0063	9.46846	4.16687	8.91745	1.35548	4.79742	1.56699	22.0091
PI567576	USB-320	0.027	4.3877	4.18834	1.05817	0.915636	1.17596	10.279	2.2116	22.631	4.26654	17.6478	1.77049	4.36908	1.9458	25.0548
PI594456A	USB-354	0.015	2.72953	4.98004	0.5407	1.0423	0.529066	7.48827	1.23377	13.4932	5.04516	8.50036	2.24987	4.42877	2.37316	64.7956
PI597478B	USB-363	0.016	3.37195	3.73441	0.829758	0.756053	1.08993	7.52516	1.88973	15.5024	4.8612	10.0645	1.56911	3.88572	1.70836	51.5353
PI603488	USB-375	0.012	3.39601	4.38416	0.839692	1.08948	0.792426	7.12049	1.4538	14.6046	2.53806	12.2724	1.31217	4.57137	1.57642	27.1781
PI603549	USB-382	0.0165	3.24763	3.27119	0.737886	0.645334	1.30946	4.94422	1.27129	10.2075	3.85249	6.76303	1.7554	3.48653	1.93905	61.0449
PI603556	USB-384	0.021	3.53897	3.78369	0.941593	0.803836	1.12434	6.1594	1.67267	15.0102	3.0844	9.67201	1.7179	4.14691	1.92564	26.5025
PI603675	USB-386	0.02	4.25889	4.87527	0.900599	0.995442	1.04164	8.91313	1.30556	14.1202	4.82337	9.2093	2.43182	4.63245	2.53072	59.5127
PI606374	USB-390	0.0145	2.85034	4.93796	0.629777	0.939393	0.650229	7.15817	1.35809	12.1728	4.9115	7.21997	2.46717	4.94511	2.66725	40.4042
PI068423	USB-421	0.019	3.11077	4.77663	0.732075	1.13343	0.705812	6.27951	1.49782	13.4893	6.81417	7.83051	1.42187	5.05557	1.56156	33.5868
PI068523	USB-423	0.011	2.39685	4.68288	0.570098	1.08134	0.599583	4.68632	1.07404	8.5322	4.70453	4.43935	1.56906	4.59943	1.83985	50.0214
PI068731	USB-425	0.022	4.49765	4.92573	0.964741	0.938559	0.888321	13.2455	2.53346	24.3838	5.47784	18.906	2.39873	4.85513	2.53903	49.8052
PI084509	USB-443	0.024	1.4649	2.67973	0.443296	0.652645	0.802714	1.47196	0.732955	3.78478	2.95379	1.40841	1.36545	2.89932	1.68408	27.5648
PI087618	USB-450	0.022	3.26394	4.40282	0.725245	0.878724	0.949615	6.75583	1.86481	16.3788	4.76266	12.145	2.4876	4.42393	2.66014	47.9547
PI088448	USB-453	0.0215	3.15337	4.77033	0.784146	1.29711	0.594609	4.55283	1.46321	12.583	4.55608	6.41393	1.72444	4.73743	1.91607	22.4692
PI091089	USB-468	0.008	2.75767	1.5489	0.568545	0.491449	1.2751	0.771117	0.454793	2.64401	2.09789	0.546124	0.639198	1.68372	0.916343	80.2385
PI092618	USB-476	0.009	1.44308	2.16419	0.368519	0.632955	0.57798	1.11315	0.617524	2.83257	2.42074	0.411826	0.800276	2.42613	1.24026	70.3983
PI092718-2	USB-478	0.012	2.48292	4.68225	0.527385	0.995356	0.986508	4.9833	1.20491	9.59265	4.55536	4.83971	1.61621	4.75512	1.85971	41.0663
PI092728	USB-479	0.024	2.92878	4.29527	0.734314	0.913651	0.910543	5.61482	1.44626	12.7519	4.77871	6.0746	1.88214	4.44693	2.21355	27.4467
PI209331	USB-498	0.016	2.70424	4.22998	0.642172	1.05238	0.606433	3.14694	1.20997	8.6486	4.59875	3.61215	1.90573	4.49916	2.33663	42.7473
PI407659B	USB-528	0.0205	2.08688	4.89742	0.446385	1.13929	0.416136	4.63484	1.39514	11.9999	5.10797	6.89198	2.29461	4.53982	2.46114	21.4956
PI424005	USB-538	0.005	2.67131	5.05548	0.54915	1.03013	0.555922	6.28022	1.08848	14.0298	2.66364	11.0986	1.967	5.04124	2.10926	26.9637
PI437476	USB-560	0.0155	3.36976	4.56808	0.898708	0.846438	1.20496	5.45924	1.36712	11.0657	4.98513	6.08058	1.68022	3.66456	1.85255	40.4099
PI437487	USB-562	0.009	2.34335	4.65276	0.658696	0.927189	0.749313	3.44619	0.998854	7.04224	4.78849	2.03208	1.80343	3.6665	1.9812	52.7252
PI438047	USB-580	0.008	2.08462	2.52371	0.551524	0.601064	0.86759	2.08872	0.709654	5.67086	2.90679	2.18079	1.38832	3.19367	1.59938	28.8737
PI438310	USB-584	0.018	1.86232	2.42487	0.443577	0.68957	0.762682	1.32464	0.718621	3.67209	2.72767	1.07913	1.26552	2.77865	1.47837	35.8532
PI438312	USB-585	0.009	1.64771	4.50742	0.506699	1.04025	0.648205	2.92655	0.724343	6.19571	4.23874	1.32596	1.84597	4.48868	2.20314	41.0917
PI475812B	USB-597	0.0155	2.86559	3.18525	0.723648	0.658237	1.00621	3.9658	1.16797	10.3503	3.64779	6.70249	1.45537	3.34217	1.58565	33.1411
PI534648	USB-616	0.021	4.53143	4.59243	0.961758	0.787114	1.22433	8.55241	2.03718	17.6526	4.698	14.1655	1.60434	4.88647	1.72475	54.3866
PI567366A	USB-669	0.016	4.18482	3.72617	0.890045	0.856502	1.19635	9.91888	2.00916	20.6766	4.54769	15.5648	2.37823	3.74435	2.45684	55.2109
PI567404A	USB-679	0.028	4.73389	4.09433	1.05666	0.881442	1.19521	6.86388	1.44403	13.7022	4.51391	10.2852	1.66875	4.18869	1.94013	60.27
PI567541B	USB-688	0.014	3.77131	4.68583	0.841021	1.03943	0.934666	8.56515	1.56429	16.2947	4.60094	11.9642	1.96719	4.48884	2.15467	43.8328
PI567599	USB-697	0.028	4.24742	5.04807	0.866604	0.920697	0.942834	12.1861	2.81884	19.5177	5.14496	13.7545	2.71814	4.54222	2.82903	42.0989
PI594409B	USB-737	0.024	3.55158	4.34743	0.75919	1.01393	0.850894	5.30779	1.92699	15.4944	5.2833	11.3972	2.31055	4.85993	2.62126	27.4868
PI594467	USB-740	0.014	3.09173	4.61265	0.724043	1.00557	0.561113	5.00759	1.41765	10.9849	5.13156	5.0329	1.45654	4.99297	1.79356	61.3937
PI603174A	USB-763	0.0075	1.65459	2.25763	0.497994	0.470866	1.3244	2.00464	0.835035	4.60315	3.81269	0.604535	1.05285	2.67374	1.5395	70.9675
PI603451A	USB-777	0.017	2.75853	4.96204	0.83696	1.16073	0.721188	4.81571	1.04861	9.46542	4.96643	4.499	1.9757	4.67458	2.25533	32.2416
PI603477A	USB-779	0.017	4.90518	4.69488	1.20789	1.03545	1.17303	9.52777	2.17666	25.3251	5.27471	24.3198	2.49783	5.01681	2.58552	24.6202
PI603502A	USB-782	0.011	4.64458	4.89979	0.898383	1.01418	0.89004	11.3135	1.4569	19.8347	5.05371	14.781	2.25297	4.50675	2.3314	64.1717
PI603911B	USB-802	0.009	2.25653	3.23942	0.632132	0.823919	0.8038	2.5584	0.956841	6.63935	4.09353	2.61595	1.33242	3.4653	1.71504	58.528
PI548402	HN002	0.019	4.79422	4.93997	1.09363	0.924917	1.20848	14.4294	2.81398	28.0687	5.00738	22.8456	2.94872	4.97511	3.05803	52.4856
PI089772	HN003	0.0175	4.35109	4.89374	1.04078	0.962004	1.05526	12.4991	1.96411	21.6389	5.36503	16.2496	2.30741	4.92468	2.47164	46.6852
PI090763	HN004	0.009	1.80651	4.84249	0.473586	1.08606	0.414718	3.56852	0.981887	6.8204	4.94385	1.7886	2.04697	4.91613	2.29683	63.2178
PI404166	HN005	0.0225	4.95227	4.93854	1.06146	0.966071	1.11087	14.8506	2.959	30.4143	5.07688	25.0573	3.24253	5.09841	3.33339	40.3142
PI424298	HN007	0.016	1.72655	5.05411	0.382142	1.31362	0.288149	4.34574	1.0715	8.28387	5.24307	3.0408	1.83263	4.36154	2.11164	28.0918
PI495017C	HN009	0.011	3.33774	3.93627	0.795192	0.825438	1.10249	4.19513	1.12254	8.59762	4.34199	4.76705	1.96714	3.34381	2.08666	58.4669
PI567305	HN012	0.0135	4.23845	4.96302	0.836402	0.941371	0.894463	11.9644	2.00955	26.9169	4.67108	22.2859	2.78374	4.95168	2.84356	63.571
PI209332	HN021	0.0155	3.73954	4.59838	0.797958	0.969539	0.860427	7.48799	1.76158	13.9696	4.66283	10.0817	2.06565	4.54268	2.21969	30.5158
PI404198B	HN022	0.013	2.43405	4.93955	0.640844	1.04753	0.636727	6.00351	1.44544	12.7739	4.97839	7.86126	1.98881	4.94149	2.2886	57.738
PI424608A	HN023	0.021	3.33783	4.62967	0.727781	0.889003	0.879048	7.35725	1.35052	12.7231	4.44103	8.36787	1.96039	4.56379	2.24728	49.8844
PI567516C	HN025	0.014	4.26351	5.0573	0.838139	1.00168	0.895601	11.85	1.49937	20.8523	4.72239	16.8675	2.64759	5.0027	2.76355	45.5436
PI407729	HN047	0.023	5.0463	4.99588	1.03675	1.04851	1.04843	16.1747	2.5155	31.1547	5.183	25.9717	2.93864	5.0658	3.01881	57.6285
PI408105A	HN049	0.0265	5.10262	4.71776	1.09983	0.990458	1.12744	15.1917	2.88562	32.1271	5.11219	26.968	2.73962	5.08059	2.87809	35.3395
PI437679	HN055	0.023	3.56796	4.99627	0.730561	1.00423	0.811182	10.3369	2.13288	20.4961	5.07368	15.3727	2.67424	4.80896	2.79366	46.8359
PI458515	HN058	0.025	5.11926	4.83769	1.08181	0.894351	1.24197	14.3761	2.54773	29.6684	5.03568	24.3123	2.50934	4.9757	2.60377	52.2537
PI567336B	HN076	0.0125	4.63115	4.92995	0.85103	0.975653	0.873083	12.0383	1.79894	24.7807	4.83575	20.1224	2.94822	4.89713	3.03685	45.1242
PI567354	HN078	0.023	5.12634	4.99229	1.04151	1.05619	1.08514	14.9434	1.56915	28.3992	4.92489	24.8096	3.00878	4.95725	3.05593	42.7927
PI567611	HN082	0.017	2.39445	4.98977	0.603303	1.00704	0.599405	6.09191	1.0336	12.3422	5.0142	8.81794	2.14006	3.63372	2.3566	44.9672
PI567651	HN083	0.017	2.93426	4.71005	0.612448	0.958324	0.635118	7.3024	1.96364	15.8239	4.67079	9.4688	2.34253	5.07073	2.53032	31.0246
PI567719	HN085	0.0195	2.76444	3.52633	0.756246	1.05403	0.685969	1.33015	0.695443	6.7204	3.78372	1.9531	1.14899	3.88838	1.77571	20.8375
PI594599	HN091	0.01	4.01547	4.82328	0.794149	1.00476	0.846601	8.42467	1.64622	17.5885	4.72395	13.435	2.61303	4.97721	2.90654	47.4413
PI603175	HN095	0.0105	3.06125	4.54191	0.798254	0.999043	0.846808	7.69951	1.6155	14.6959	4.4257	10.2702	2.41086	4.85222	2.85274	37.3186
PI603176A	HN096	0.01	4.06425	4.99862	0.776024	0.998431	0.777311	11.1969	1.34204	17.877	5.02296	12.8779	2.24702	3.72328	2.41691	54.5746
PI639740	HN099	0.015	4.31419	4.92371	0.98546	0.99569	0.906964	10.3293	2.19124	21.2546	5.11332	15.8109	2.54331	4.72016	2.70892	39.6119
PI229343	HN108	0.025	3.26015	4.84645	0.811531	0.952819	0.761482	5.03485	1.5298	11.6668	5.16333	5.60548	2.37107	4.57297	2.62737	29.3634
LD00-3309	LD00-3309	0.018	3.11629	4.65377	0.643014	0.946886	0.710392	9.0722	1.95438	18.241	4.82712	13.0662	2.18116	4.7839	2.35602	46.481
LD01-5907	LD01-5907	0.016	3.12526	4.18558	0.785114	0.813229	0.714345	7.76983	1.50209	11.4417	3.92456	6.04933	1.64346	4.18246	1.74401	53.4682
LD02-9050	LD02-9050	0.026	4.87379	4.93462	0.98323	0.932652	1.01476	12.0218	2.25975	24.1088	4.89688	19.1244	2.27258	5.0062	2.4355	52.539
S06-13640	S06-13640	0.024	3.74511	4.69455	0.882864	1.09453	1.00776	8.21185	2.5788	25.2669	5.07132	18.8947	2.3066	5.17504	2.4133	33.5458
LG05-4292	LG05-4292	0.023	4.57655	4.97224	1.005	0.941455	1.13994	13.5385	2.56128	26.0968	5.13215	20.575	2.4165	4.92144	2.5547	49.2752
LG05-4317	LG05-4317	0.0225	3.86735	4.87284	0.937868	0.979068	1.13289	11.0402	2.50406	20.1551	5.7426	12.1748	2.14169	5.01963	2.27573	31.9849
FC033243	USB-002	0.02	3.20315	4.43126	0.690705	0.837479	0.814383	6.80907	1.45367	10.5862	4.54925	6.0369	1.8655	4.6865	2.14367	57.7829
PI506862	USB-016	0.031	2.07379	4.83929	0.496025	0.95526	0.498767	5.39225	1.75498	12.0195	4.94553	7.074	2.20868	5.00712	2.40219	29.7663
PI559932	USB-038	0.0225	3.31348	3.3158	0.764409	0.741714	1.1805	4.83736	1.41598	11.3203	4.25985	7.72974	1.62291	3.85809	1.81643	40.6205
PI567426	USB-040	0.014	3.99032	3.84326	0.918159	0.86103	1.16121	6.22389	1.42869	13.0075	4.12968	9.9907	1.51792	3.91391	1.70452	47.6882
PI578495	USB-044	0.028	4.22206	5.00333	0.79352	0.925117	0.866279	12.1364	2.13831	19.4582	5.17891	14.2793	2.58414	4.32687	2.68464	35.321
PI597476	USB-048	0.0255	4.5356	4.59799	1.12114	1.08445	0.961481	10.8115	2.20136	24.0248	4.35783	19.8644	2.18251	5.03046	2.35158	26.5452
PI054614	USB-063	0.017	3.5908	4.92864	0.784463	1.08263	0.70886	9.86639	1.98938	20.1274	5.24181	14.4005	2.42991	5.08093	2.62366	36.0046
PI086972_2	USB-085	0.0175	3.42693	4.78668	0.825547	0.912136	0.956423	7.34325	1.72917	14.9274	4.92215	9.82152	1.77421	4.82312	1.99816	41.7556
PI090479P	USB-091	0.026	2.04681	4.02846	0.469885	0.854444	0.555457	4.26236	1.26387	8.60378	4.12087	4.4829	1.57485	4.1239	1.8281	56.2371
PI091159_4	USB-094	0.017	3.2433	1.99215	0.719131	0.519972	1.57063	1.86119	0.759265	6.59275	2.51158	5.52401	1.28763	2.28577	1.37297	41.2739
PI092651	USB-096	0.021	2.47744	3.63716	0.559366	1.03202	0.642642	3.56483	1.37118	12.8997	4.52461	7.5213	1.55803	3.86424	1.76564	29.7485
PI171428	USB-109	0.015	3.3626	4.7868	0.713921	0.933358	1.08778	9.3741	1.65288	15.8794	5.13325	10.7962	2.17856	4.78798	2.35588	33.7702
PI398965	USB-147	0.016	2.99062	3.91815	0.905742	0.968937	1.04194	2.79427	0.909033	5.92708	4.71856	2.38746	1.87344	4.08742	2.26339	27.5099
PI423926	USB-162	0.022	4.83264	4.599	1.22276	0.958014	1.14286	9.39393	1.78938	20.4262	4.80054	19.6299	2.16548	4.4064	2.3292	48.4934
PI430595	USB-167	0.027	3.51965	4.66329	0.790339	1.00807	0.914313	10.9923	2.13268	19.8602	4.71645	14.7294	2.50906	4.37093	2.61552	57.5886
PI437127A	USB-171	0.017	4.71573	4.83884	1.15874	0.983119	1.12632	12.5106	2.77685	25.8492	5.37463	20.4745	2.87197	5.00797	3.02187	34.5982
PI464912	USB-214	0.018	2.61317	4.00637	0.667109	0.96241	0.931493	3.62212	1.60802	12.9321	6.54465	6.10999	2.10222	4.25433	2.35428	21.0128
PI495020	USB-223	0.0215	3.13611	4.46445	0.72798	1.03951	0.726953	5.36893	1.47562	12.7277	4.14147	8.93628	1.95789	4.32598	2.16021	31.3448
PI506933	USB-228	0.015	4.32628	4.99524	0.812379	0.888314	0.982458	11.5166	1.98706	24.4617	5.01504	19.5546	2.75957	4.55553	2.82369	42.5676
PI507480	USB-238	0.017	3.84958	4.17231	0.917613	0.816199	1.03489	10.3622	2.09504	18.7568	4.49765	14.1088	2.21054	4.51029	2.36774	29.8377
PI548169	USB-250	0.0165	3.36656	3.94099	0.836791	0.823088	1.06039	6.26907	1.58886	12.818	4.93795	7.88005	1.63942	3.91681	1.7943	29.0394
PI548200	USB-253	0.02	4.6509	5.06079	0.980621	0.972052	0.991436	13.455	2.38649	23.028	5.14555	17.8824	2.84904	5.1469	2.97136	30.707
PI548359	USB-257	0.012	2.73509	4.81452	0.725215	1.00857	0.877357	6.93533	1.47877	11.9141	5.08354	7.06693	2.28269	4.82766	2.5491	41.0632
PI548427	USB-261	0.0205	3.19742	3.76166	0.747239	0.826214	1.00909	7.32625	1.92598	15.5332	3.96732	11.8733	2.16493	3.89524	2.27598	26.9925
PI548619	USB-271	0.0145	4.01518	4.33331	0.921981	0.853188	1.12249	9.84707	1.91217	19.686	4.29452	14.9617	2.3776	4.54201	2.50867	40.3531
PI561701	USB-287	0.0145	3.40961	4.81638	0.654859	0.921361	0.711026	6.38721	1.58776	15.4983	4.89894	11.2315	1.95152	4.5653	2.10662	51.6583
PI567352A	USB-302	0.014	3.33351	4.83985	0.801197	1.14957	0.69404	7.9058	1.94215	19.3098	5.09003	14.1508	1.92704	4.97376	2.1749	49.886
PI567353	USB-303	0.014	4.99609	4.86811	1.03138	0.892222	1.1885	14.789	2.28621	27.9263	4.95657	22.7899	2.90304	4.98892	3.04142	45.9473
PI567415A	USB-309	0.023	3.65984	4.37304	0.742812	0.869467	0.624611	7.26622	2.17973	19.5022	4.64534	13.4768	1.92351	4.45636	2.01513	41.429
PI567416	USB-310	0.019	3.49774	4.45447	0.828754	0.975258	1.03239	6.93003	1.8197	16.8323	4.77303	11.6479	2.25019	4.69488	2.43329	44.7968
PI567428	USB-312	0.018	2.91766	3.94908	0.733903	0.955335	0.772542	5.08717	1.38973	10.647	4.76962	6.89345	1.85853	4.08557	1.99907	30.2212
PI567488A	USB-315	0.015	3.61552	3.12302	0.958069	0.919498	1.33808	4.37012	1.0529	9.62812	3.50337	7.21188	0.965787	3.01624	1.44954	25.8992
PI567489A	USB-316	0.0175	3.23003	4.8435	0.769366	1.15345	0.638816	8.11524	1.86174	17.626	4.72909	12.4452	2.02707	5.15427	2.17124	19.052
PI567548	USB-319	0.011	1.83294	4.57259	0.393833	1.29784	0.301495	3.25113	0.791353	6.6476	4.52301	2.12459	1.35965	4.75824	1.82134	55.1124
PI567675	USB-322	0.025	4.75748	4.9848	1.01745	0.878104	1.17832	13.2472	2.88099	28.3591	5.08371	23.2843	3.00469	4.8676	3.06408	38.2911
PI567685	USB-323	0.023	4.2812	4.84384	0.983172	1.05359	0.895478	7.01048	1.40292	15.7025	4.75917	11.1345	2.66155	3.80476	2.74489	46.8069
PI567698A	USB-324	0.019	4.27741	3.57074	0.964801	0.772667	1.36033	7.19558	1.86402	17.5419	3.39285	14.149	1.63593	3.84697	1.77296	44.0815
PI567726	USB-325	0.013	2.14832	4.79192	0.526086	1.01348	0.520702	5.40893	1.57759	10.8742	5.40479	5.39047	2.30398	4.84586	2.46334	33.3854
PI567746	USB-326	0.017	3.82573	4.91883	0.841314	0.981444	0.785839	12.1347	2.10299	27.0785	4.81966	22.3664	2.2606	4.97452	2.49216	21.1225
PI567780B	USB-327	0.01	2.39991	4.91916	0.509323	1.00861	0.506559	6.60223	1.21426	10.5758	4.74476	5.83103	2.6754	4.93357	2.82714	45.4371
PI574477	USB-330	0.02	5.03948	4.8403	1.19498	0.816069	1.4867	11.9233	2.38909	21.3745	4.94023	16.3879	2.71563	4.39933	2.79564	60.0841
PI587588A	USB-338	0.015	4.05018	5.04007	0.791507	0.982558	0.805564	11.633	2.008	19.7621	5.23503	14.5847	2.30523	4.09458	2.39149	31.1616
PI587804	USB-342	0.01	5.06753	4.77442	1.01213	0.886186	1.21643	13.7603	1.72141	23.4835	5.00114	18.7961	3.09399	5.01319	3.18418	70.0626
PI592940	USB-346	0.011	3.21324	3.99771	0.874631	0.853504	1.09935	3.78961	1.2037	9.65124	4.45363	5.89198	1.27182	4.08734	1.50522	31.0371
PI602502B	USB-366	0.0185	3.45477	4.76536	0.812489	1.08746	0.752878	6.62349	1.5439	16.6263	4.34814	13.5592	2.00187	5.07811	2.16795	29.3612
PI602993	USB-367	0.012	2.92887	4.44575	0.605277	0.894346	0.659652	5.55	1.23689	10.3978	4.56539	5.92307	2.04809	4.73949	2.27199	44.6501
PI603492	USB-376	0.015	2.96402	3.07832	0.743856	0.677886	1.09612	4.94194	1.5621	10.7596	5.48172	5.27791	1.72551	3.415	1.82788	42.2565
PI603494	USB-377	0.0225	5.00266	3.7906	1.09989	0.643131	1.05944	10.365	2.17814	19.0807	4.18802	14.8927	2.09062	4.0073	2.20659	48.6055
PI603526	USB-381	0.021	4.79961	4.93863	1.00613	0.945896	1.11343	14.6866	2.58772	30.1606	5.2876	24.873	2.93427	4.83289	3.00235	45.4568
PI603555	USB-383	0.02	2.16043	4.8262	0.608869	1.07624	0.690098	5.24822	1.29317	8.10424	4.95556	3.14868	1.87197	3.37659	2.04878	19.9434
PI603559	USB-385	0.017	3.14388	4.68107	0.649413	0.965635	0.825422	7.28238	1.81275	14.4569	4.28297	10.1739	1.82283	4.98673	2.03592	49.9815
PI631123	USB-399	0.026	3.08019	4.95868	0.617908	1.17252	0.558306	9.1946	2.64996	28.4644	5.82892	21.6236	2.78179	5.04091	2.83764	27.9559
FC003654-1	USB-412	0.017	3.69329	4.93003	0.966245	1.00668	0.712403	8.92895	1.50462	13.0376	5.3641	8.12	1.94889	5.08876	2.10899	55.0818
PI060970	USB-418	0.019	4.22783	3.04455	1.00123	0.625909	1.58511	6.90214	1.75035	14.4307	3.70656	10.7241	1.4507	3.17986	1.63515	61.8087
PI062202-2	USB-419	0.021	4.9184	4.54997	1.11031	0.908906	1.08703	9.3443	2.05823	18.5063	5.622	15.9925	2.57827	4.8462	2.78499	54.5154
PI068679-2	USB-424	0.0145	2.25683	2.32386	0.53603	0.519365	0.988056	2.70326	0.853486	6.41022	2.8479	3.56232	1.33654	2.43296	1.4336	48.9981
PI070242-2	USB-432	0.0185	3.43965	4.71241	0.706368	0.987229	0.721975	9.00174	2.1563	17.0099	5.10915	11.2089	2.78477	4.98876	2.86591	52.9147
PI079870-4	USB-437	0.015	2.47738	3.55008	0.612021	0.828405	0.719716	4.45989	1.33287	9.13524	4.28643	4.84881	1.79366	4.04218	1.97005	38.7317
PI084660	USB-444	0.014	1.89325	2.87056	0.512021	0.675558	0.988183	2.79338	0.99069	6.00602	3.61763	2.38839	1.55744	3.12695	1.73504	39.4162
PI088499	USB-455	0.014	2.65832	3.167	0.740331	0.803779	0.838606	2.43425	0.810162	6.18174	3.96797	2.21376	1.63029	3.48658	1.86836	32.6285
PI090495N	USB-462	0.027	4.65469	4.6884	1.04139	1.01232	1.09079	8.53446	1.82617	16.407	5.05565	12.2473	1.66363	4.77155	1.8515	49.0225
PI091132-3	USB-470	0.028	3.36454	4.81764	0.817993	1.15874	0.769167	8.67156	2.69549	28.3631	6.77103	20.6248	2.32778	5.02086	2.4482	12.2634
PI091731-1	USB-473	0.006	1.11365	2.79373	0.259186	0.811956	0.476313	1.61706	0.720858	3.30341	3.02574	0.277661	1.69553	3.10035	1.89744	NA
PI092688-2	USB-477	0.026	2.32751	3.68613	0.513747	0.862511	1.06397	4.48349	1.3691	8.94028	4.87678	4.05962	1.61394	4.01042	1.7508	58.299
PI227320	USB-500	0.008	2.17683	4.82952	0.55058	0.975592	0.505461	4.18335	1.09423	8.7326	4.9912	3.7093	1.65031	4.05689	2.35855	39.2933
PI253652B	USB-504	0.0255	3.46697	4.75571	0.956122	1.28886	0.891518	5.40776	1.31468	11.9297	4.82189	8.17944	1.4906	5.03295	1.78653	30.7017
PI253656B	USB-505	0.012	3.20635	3.88357	0.762007	0.898217	0.788245	3.92598	1.32654	12.8916	2.69521	9.93105	2.13937	4.72888	2.30945	17.7067
PI377574	USB-520	0.012	1.2193	3.43952	0.359369	0.973536	0.942138	2.21896	0.743305	3.85319	2.15231	0.423852	1.31179	3.63446	1.62756	22.9204
PI378682C	USB-522	0.021	4.87135	4.82425	1.10083	0.946332	1.1633	14.9984	2.97972	30.6776	5.00603	26.0239	2.91087	5.12562	3.01053	44.3303
PI404161	USB-525	0.015	3.09577	4.71342	0.671308	0.930222	0.688053	7.05522	1.6801	12.7104	4.77509	7.93532	2.33758	4.97696	2.45305	37.3549
PI404199	USB-527	0.0165	3.15618	4.42583	0.715843	1.01917	0.689239	6.58956	1.48295	12.0315	4.41175	9.02967	2.00788	4.50161	2.29135	29.4781
PI417007	USB-533	0.011	2.60302	4.94507	0.549139	1.06856	0.51917	6.21167	1.34459	13.6675	5.0046	9.45287	2.72028	4.61206	2.83736	52.5142
PI430598B	USB-541	0.024	2.86147	4.74767	0.547353	0.987778	0.580222	6.44293	1.51693	12.0445	4.99533	6.90474	2.40771	4.20993	2.65984	49.3843
PI437798	USB-574	0.025	1.89461	3.77316	0.534407	0.941425	0.642146	1.65009	0.832425	4.64379	4.22829	1.48242	1.7868	4.06274	2.17977	39.2243
PI476939	USB-602	0.012	3.91521	4.52229	0.919061	1.0342	1.00983	3.59234	1.19797	14.1443	1.68572	12.467	1.78508	4.59479	1.95459	28.3725
PI540555	USB-619	0.028	3.58005	4.27952	0.818109	0.829801	0.751736	6.45379	1.77029	14.1535	4.32122	7.91948	1.97725	4.45636	2.15528	63.191
PI548547	USB-637	0.012	2.1874	3.07073	0.53177	0.837072	0.636178	2.24635	0.592654	5.06323	2.9314	2.13184	1.23052	3.00638	1.35496	62.4402
PI567265	USB-663	0.012	3.20249	3.79962	0.759692	0.716932	1.27727	6.06568	1.30532	12.1067	4.01825	8.0884	2.21085	3.99466	2.35141	58.6377
PI567272A	USB-664	0.016	3.34356	4.71595	0.78871	0.898397	1.03583	7.62878	1.92634	15.1274	4.45771	10.1266	2.40346	4.51703	2.66192	35.8885
PI567331	USB-666	0.01	3.47912	4.8457	0.684131	0.965201	0.689169	9.71166	1.3393	15.8557	5.19602	10.0688	2.29204	5.08699	2.4845	36.5505
PI567370A	USB-670	0.014	4.30029	4.87157	0.855069	0.929078	0.979521	10.6999	1.93223	18.4447	5.04933	13.5973	2.29637	4.38024	2.39347	59.6644
PI567395	USB-676	0.013	3.71132	4.97629	0.761813	1.01199	0.754296	10.219	1.90966	17.0055	5.11176	11.1882	2.51352	4.75672	2.704	44.4236
PI567396B	USB-677	0.022	2.57433	2.78977	0.546608	0.638916	0.86859	2.43272	0.932544	6.5989	2.56448	4.58729	1.30172	3.05533	1.41427	19.6557
PI567398	USB-678	0.009	3.26394	4.88265	0.705507	1.04903	0.67312	9.84438	1.68043	16.6304	4.83053	11.7999	2.6212	5.08371	2.76433	30.0909
PI567482B	USB-686	0.0205	4.63658	4.63127	1.00799	0.983327	1.0695	8.13871	1.40887	16.09	3.93316	13.4411	1.84317	4.02402	1.93609	59.7956
PI567503	USB-687	0.0235	3.44336	4.30859	0.785332	1.09286	0.959028	6.38152	1.59567	17.7006	2.25211	14.1656	1.66147	4.80395	1.83089	22.0356
PI567556	USB-690	0.02	4.66304	4.84831	1.06273	1.20029	0.93841	12.6542	2.22694	20.2791	5.80921	14.4699	2.28028	5.03088	2.52338	27.5535
PI567582A	USB-694	0.016	2.06544	2.98692	0.405603	0.850116	0.621714	1.44241	0.630314	5.77702	1.76677	4.01025	1.39712	3.52293	1.73848	10.5083
PI567638	USB-699	0.01	2.60545	3.13468	0.639703	0.809228	0.818401	2.94867	0.86542	5.97906	3.25623	1.99586	1.54221	3.26672	1.6995	54.4978
PI567648C	USB-700	0.012	3.62235	4.82472	0.731617	0.914712	0.802003	10.8772	1.86569	19.1723	5.06484	14.0621	2.86017	5.11471	2.98511	35.9701
PI567721	USB-701	0.0155	2.75046	3.5157	0.679657	0.853358	0.736732	4.04722	0.978209	8.06865	1.49262	4.40455	1.46563	3.52643	1.61101	21.1188
PI567772	USB-703	0.018	3.6855	4.83255	0.817892	1.01936	0.898935	6.8886	1.18664	12.5185	4.6191	7.89942	2.05986	4.48379	2.28167	40.1202
PI578490	USB-710	0.016	2.90267	4.874	0.67896	1.29311	0.507284	5.69134	1.66995	15.019	5.42072	9.59829	1.91079	4.65806	2.18259	43.6563
PI587575A	USB-713	0.007	2.27482	4.08978	0.683846	0.880656	0.582541	2.10422	0.890176	5.13359	3.98885	0.776386	1.68547	3.95018	1.90032	36.3724
PI588015B	USB-729	0.013	4.67913	4.8157	0.975315	0.917614	1.1519	13.1868	1.72673	23.9523	4.89246	20.7314	2.80503	4.69707	2.90941	50.386
PI588026C	USB-730	0.011	2.3405	2.75144	0.624272	0.603265	1.15397	3.24975	0.914739	7.22507	3.31677	3.9083	1.66309	3.00503	1.81159	51.1305
PI594883	USB-758	0.0075	1.71808	4.04096	0.471885	0.909053	0.518923	3.05187	0.969628	5.96646	4.2467	1.7966	2.14728	4.05941	2.4305	51.8926
PI597384	USB-759	0.009	1.91823	1.60147	0.527062	0.406628	1.25231	1.01998	0.675948	3.00697	2.60214	1.81497	0.92883	1.45841	1.02735	51.2959
PI603490	USB-780	0.021	4.8007	4.0367	1.01939	0.839914	1.1624	12.4533	2.52319	27.7596	4.3877	23.3719	2.47883	4.37017	2.59114	54.3553
PI603505	USB-783	0.0135	3.13436	4.49927	0.760888	0.989109	0.769392	7.31303	1.41068	13.0493	4.95396	8.06599	2.01348	4.38104	2.27565	23.5189
PI603554B	USB-792	0.01	2.27424	4.43567	0.682589	1.15029	0.595061	3.7234	0.975427	7.78956	5.04057	2.54628	1.90691	4.69109	2.25567	63.8678
PI603574	USB-794	0.018	4.90939	4.8093	1.01646	0.930658	1.1263	13.422	2.20841	23.3414	4.94553	17.8913	2.90018	4.81368	3.01978	38.9014
PI603687A	USB-798	0.024	4.05389	4.82775	0.888202	1.03715	0.862262	13.0332	3.01803	21.8308	6.5417	13.915	2.98656	5.08228	3.10813	45.2088
PI605839A	USB-803	0.009	3.05937	4.26079	0.662012	0.914862	0.835658	5.32823	1.16117	10.0567	3.94226	6.11445	1.869	4.70373	2.03609	58.0027
PI656647	USB-819	0.013	2.30117	3.96231	0.540855	1.12207	0.416873	2.79976	0.802049	7.07838	4.0751	2.979	1.56756	4.23094	2.0301	52.1873
PI567307	USB-298	0.0165	4.33741	4.92123	0.892661	0.945494	0.991464	12.3657	2.09137	24.4003	5.13346	19.2003	2.516	4.7426	2.61939	55.7347
PI594012	HN089	0.008	2.65786	4.82797	0.527088	1.05201	0.555987	4.60387	0.961146	8.41732	4.46075	3.95658	1.94605	4.07158	2.24039	62.5576
PI518664	HN001	0.028	4.54946	5.04394	0.845221	0.927421	0.960178	12.9427	2.07016	22.6494	5.21396	17.49	2.5047	4.34844	2.58224	51.6313
S10-11227	HN027	0.011	3.04787	4.48717	0.696581	0.943926	0.647864	5.81636	1.07714	9.59804	4.78647	5.39013	1.32512	3.94344	1.60336	36.4699
PI572239	HN028	0.0135	1.60092	3.23299	0.358145	0.687241	0.580123	3.59227	0.92208	6.75587	3.50532	2.41531	1.652	3.27451	1.88959	28.2105
PI196175	HN035	0.01	3.08465	4.06737	0.687267	0.845851	1.00848	5.38238	1.04188	10.4627	4.03519	6.91662	1.90025	4.11464	2.0429	51.0562
PI398593	HN041	0.02	4.63784	4.91735	1.08906	0.915106	1.26554	11.8446	1.88669	19.8037	5.16421	14.7203	2.23851	4.43265	2.34501	56.9615
PI398595	HN042	0.0145	4.68275	4.65225	0.960613	0.892674	1.20303	9.94458	1.8055	14.8491	4.94065	10.4962	2.08271	4.78402	2.23759	67.2342
PI398610	HN043	0.0175	4.46096	4.57583	1.1062	0.880574	1.21248	7.99143	1.69544	18.1374	4.0549	14.4679	1.96052	4.71228	2.12253	52.1509
PI398614	HN044	0.017	4.83323	4.42587	1.01587	0.887169	1.24603	11.9086	1.83767	21.9629	4.68376	17.2385	2.43496	4.62605	2.53337	43.0609
PI407965	HN048	0.013	3.72345	5.01049	0.783585	1.00989	0.752302	9.6216	1.88403	13.8062	5.13637	8.41985	2.27025	4.6504	2.41424	51.224
PI471938	HN061	0.0235	2.44173	4.492	0.592582	0.961063	0.713969	5.78425	1.46384	10.5004	4.8259	6.04768	1.98817	4.66737	2.25132	44.8823
PI561271	HN074	0.0265	3.9696	4.77551	0.846319	0.985282	0.833999	9.89473	2.84188	24.8435	5.10161	19.9411	2.70755	5.04975	2.83543	23.5427
PI567230	HN075	0.0115	4.80546	4.992	0.999482	0.97912	1.0276	15.6406	1.95049	29.1133	4.79224	24.6874	3.26317	5.04011	3.34856	55.8535
PI567343	HN077	0.009	3.58591	4.93378	0.667101	1.06449	0.627237	9.53804	1.39688	20.3846	3.82784	16.5568	2.6853	5.13843	2.8245	42.4563
PI567383	HN080	0.023	2.61034	4.81987	0.624667	1.07622	0.63638	6.51683	1.56126	11.68	5.34548	6.26906	2.2137	4.8625	2.44496	28.5081
PI605869A	HN098	0.013	4.59028	4.88694	1.02719	1.01965	0.996782	13.4508	2.39222	25.8851	4.32826	22.0097	2.61268	5.08362	2.76406	25.1327
TN05-3027	TN05-3027	0.0165	4.29814	4.92215	0.93479	0.991372	0.947676	12.8375	2.31441	21.0489	5.37522	15.6905	2.29946	4.98425	2.47751	40.9492
PI548452	USB-029	0.0195	2.537	4.86741	0.453442	1.07691	0.425356	6.56346	1.56806	12.2501	4.97924	7.22115	2.14856	4.89254	2.31253	50.109
PI062203	USB-066	0.017	3.21945	4.45346	0.803909	0.990271	0.906436	5.49412	1.56523	13.4916	4.5257	8.86997	1.89907	4.34953	2.17509	20.6554
PI083942	USB-076	0.02	3.46884	4.21726	0.813595	0.997498	0.816206	6.44457	1.68131	16.0359	4.47347	11.5625	1.86251	4.44221	2.06027	20.7532
PI379618	USB-143	0.018	5.13527	4.92932	1.14635	1.0147	1.1385	16.3211	3.2529	34.9454	4.94267	29.919	2.92171	5.09154	3.02729	32.509
PI398633	USB-146	0.0125	3.81352	4.94069	0.742926	0.953705	0.805488	10.3803	1.84726	17.8563	5.08139	12.7169	2.65155	4.76654	2.77991	35.3121
PI407742	USB-151	0.0215	4.42865	5.03257	0.970579	1.16832	0.901738	10.2553	2.28109	23.6121	4.55768	18.9243	2.44196	5.11139	2.5879	24.4948
PI416838	USB-153	0.0255	3.92465	4.55773	0.929915	0.93089	1.01276	8.1532	2.19347	19.536	4.75188	15.0811	2.16841	4.43341	2.26787	63.8089
PI417581	USB-161	0.018	2.68588	4.89709	0.653981	1.13906	0.535737	5.31249	1.20648	10.1747	5.02187	5.47784	1.9837	4.84687	2.16738	29.4543
PI504288	USB-227	0.003	1.62211	4.84047	0.313796	1.31715	0.228828	4.51082	0.606946	8.30864	2.05382	6.29753	2.15786	5.08244	2.6019	18.319
PI548696	USB-274	0.015	3.60495	3.31804	0.816089	0.618042	1.37449	7.65194	1.56659	14.1704	3.87414	9.96534	2.02486	3.45123	2.13938	34.3604
PI561387	USB-285	0.0115	2.82107	3.01784	0.709314	0.665567	1.21862	3.86634	0.919525	8.11663	3.18347	4.76776	1.45845	3.38872	1.7173	43.0251
PI567346	USB-301	0.013	3.42486	3.55259	0.852015	0.854741	1.04411	3.17099	0.930561	9.1574	3.45435	6.09103	1.5625	3.84284	1.73642	40.81
PI567407	USB-306	0.0175	3.60415	4.78554	0.827708	0.911619	0.928033	8.85975	2.1016	17.099	5.04828	11.951	2.30295	4.79813	2.49556	37.2706
PI567408	USB-307	0.015	2.66996	4.86684	0.598728	1.04283	0.575599	7.40668	2.3062	17.4499	5.03931	12.4106	2.59709	5.01622	2.74979	22.8237
PI567439	USB-314	0.0105	2.44707	3.85257	0.655248	0.982213	0.76038	3.1056	0.999397	6.23822	3.90628	2.54341	1.65943	3.40447	1.86547	67.3359
PI587712B	USB-341	0.015	4.30429	4.99482	0.922575	1.02355	0.902753	14.8032	2.4532	24.5038	5.22365	18.9014	2.97867	5.02692	3.10803	37.6432
PI594880	USB-357	0.018	4.69446	4.89014	0.954002	1.07683	0.873914	13.2922	3.48998	34.1629	5.13241	28.9828	3.30419	5.19602	3.39557	22.1438
PI594922	USB-358	0.017	1.76474	3.14592	0.452213	0.916012	0.842772	1.77514	0.749459	6.49038	3.00006	3.94088	1.25375	3.00669	1.43836	19.9834
PI598358	USB-364	0.01	2.33	3.3182	0.595272	0.904622	0.766565	2.61216	1.2457	9.18225	3.86634	4.61223	1.43846	3.86525	1.63269	32.3779
PI603495B	USB-378	0.017	4.18583	4.95051	0.759852	0.987539	0.769559	12.6032	2.0465	22.0752	5.08531	16.9898	3.25164	4.83382	3.34525	54.9855
PI632418	USB-400	0.016	2.48594	4.30168	0.697715	0.986766	0.702336	2.83271	0.960423	6.84433	4.52646	2.31787	2.25454	4.66636	2.55483	49.9664
PI079832	USB-436	0.011	2.395	2.7068	0.680574	0.786139	1.22648	1.76399	0.640072	5.13388	2.73479	3.60672	1.20198	2.87891	1.49904	20.5303
PI086084	USB-446	0.032	2.97792	4.52079	0.882103	1.07499	0.786062	3.89066	1.19794	8.95157	3.9685	3.93825	1.84753	4.85273	2.03766	30.9067
PI086982	USB-447	0.014	3.04619	4.43658	0.655132	1.04543	0.627274	3.35639	0.925449	8.35001	4.60781	4.86507	1.73384	4.79746	2.07486	55.7586
PI091725	USB-472	0.005	1.14813	0.9304	0.362447	0.27274	1.56591	0.472178	0.285445	1.69787	1.28205	0.0704379	0.841396	1.15956	0.976886	12.4122
PI093055S	USB-480	0.015	1.46111	2.28046	0.389177	0.591115	0.735791	0.934904	0.653618	3.95902	2.58032	1.64216	1.44118	2.73534	1.62569	16.8546
PI123587	USB-486	0.016	4.35551	4.08039	0.681308	0.9159	0.607006	2.43751	0.902529	8.4624	5.00392	3.34103	1.91501	4.22753	2.18011	53.5931
PI399058	USB-524	0.007	2.47826	2.77696	0.599978	0.687235	0.969024	2.76393	0.795259	6.62755	3.6877	2.80864	1.36177	3.18196	2.05082	30.6613
PI408088	USB-530	0.015	2.78968	4.84904	0.611489	1.0127	0.605054	7.82253	1.41877	15.9709	5.25676	10.5349	2.59134	5.06374	2.74258	35.7774
PI504495	USB-604	0.022	1.78716	3.72151	0.484005	0.821987	0.734183	3.4546	0.947171	6.89973	3.36635	2.89091	1.65463	3.99668	1.89109	47.1115
PI549023B	USB-642	0.02	3.93333	4.05208	0.94081	0.867668	1.10402	7.82863	2.12386	17.6171	4.29586	13.953	1.88289	4.31318	2.03451	42.2927
PI567060A	USB-656	0.015	4.6065	4.83828	0.988096	0.92764	1.12212	12.0592	1.78154	18.6991	4.50843	14.3507	2.4409	4.83761	2.55701	56.3017
PI567381B	USB-672	0.021	2.9511	4.85378	0.663664	1.06925	0.61673	7.77277	1.53428	12.3709	5.39907	7.08807	2.18199	5.00535	2.40161	59.2498
PI567390	USB-673	0.0205	2.61556	2.61052	0.693322	0.630577	1.32057	1.25086	0.638105	3.87785	2.81538	1.06247	1.65175	2.99497	1.88182	43.9773
PI567392	USB-674	0.02	3.8567	4.78769	0.785071	0.859275	0.837068	10.1124	2.00917	17.5186	4.92948	12.5891	1.97812	4.14012	2.08602	45.2086
PI594660A	USB-745	0.014	4.26014	4.40868	0.887236	0.96997	0.919135	7.0647	1.64449	20.1186	4.29991	18.2224	1.81742	4.66683	1.95601	25.5163
PI603510	USB-784	0.017	4.80787	5.02751	0.987359	1.01087	0.977566	15.0779	2.74509	30.4457	5.11994	25.2626	3.31711	5.07427	3.41467	36.6297
PI603910C	USB-801	0.015	3.64442	3.89061	0.865606	0.852529	1.06695	5.43992	1.35664	11.8863	3.47668	9.26903	1.59996	3.99087	1.75278	28.618
PI632654	USB-812	0.01	2.03845	4.0858	0.386856	1.08842	0.363141	3.36611	0.824168	6.81312	4.08525	1.74904	1.53402	3.90927	1.82489	64.5942
PI458020	AB-01	0.012	2.5724	4.52436	0.600073	0.961615	1.18281	5.80244	1.31771	10.6611	4.40388	5.59782	1.7322	4.31642	2.09055	49.4096

## Sheet: S3
Supplementary Table S3. Descriptive Statistics and Broad-Sense Heritability of RSA Traits
Trait	Mean	Range	SD	CV %	H2
Dry root biomass (g)	0.0173	0.0030 - 0.0343	0.0053	30.5095	0.32
Width (cm)	3.3657	1.0521 - 5.0943	0.7734	22.98	0.14
Depth (cm)	4.1976	1.0908 - 5.0527	0.7061	16.8219	0.26
SDx	0.7678	0.2942 - 1.1557	0.163	21.2265	0.12
SDy	0.9241	0.3020 - 1.2311	0.1453	15.7241	0.19
SDx/Sdy	0.9001	0.3217 - 1.8632	0.2354	26.1538	0.14
Convex hull area (cm2)	7.7697	0.5716 - 16.2865	3.1129	40.0643	0.16
Biomass (pixels)	3.6353e+07	5260405.57 - 78691237.8	1.26829e+07	34.8883	0.15
Total root length (cm)	16.1325	1.7480 - 35.1928	6.1199	37.9354	0.14
Primary root length (cm)	4.4415	1.4131 - 6.5332	0.8681	19.5441	0.16
Lateral root length (cm)	11.691	0.3349 - 30.2853	5.7227	48.9499	0.13
Lateral root tip depth (cm)	2.0702	0.8590 - 3.4051	0.4658	22.5009	0.19
Primary tip depth (cm)	4.2782	1.2945 - 5.1490	0.6278	14.6755	0.2
All tip depth (cm)	2.266	0.9595 - 3.4899	0.4321	19.0704	0.19
Vertical_angles (degree)	41.7573	12.4122 - 80.2385	11.7153	28.0558	0.27

## Sheet: S4
Supplementary Table S4. Metadata for validation of Soybean RSA.
Entry	PI#	MG	Plant name	Ecotype	Origin country	Origin city	Collection year
E-001	PI518664	V	Hutcheson	Cultivar	USA	Virginia	1988
E-005	PI404166	IV	VIR 5222	Landrace	China	NA	1975
E-008	PI437655	III	VIR 5269	Landrace	China	NA	1979
E-023	PI567516C	IV	NA	Cultivar	China	Shandong	NA
E-025	S10-11227	V	NA	Cultivar	USA	NA	NA
E-046	PI458515	IV	Tie Zhugan	Landrace	China	Shandong	1981
E-062	PI567336B	IV	Lao hei dou	Landrace	China	gansu	1993
E-070	PI567690	III	Fuyang 7	Landrace	China	anhui	1993
E-076	PI594599	IV	Chang de chun hei dou	Landrace	China	hunan	1996
E-083	PI605869A	V	sample140	Landrace	Vietnam	laocai	1998
E-084	PI639740	IV	LD00-3309	Cultivar	USA	Illinois	2005
E-090	PI404188A	II	Huaj an sier dian	Landrace	China	NA	1975
E-099	LD00-3309	IV	NA	Cultivar	USA	NA	NA
E-107	S06-13640	IV	NA	Cultivar	USA	NA	NA
E-113	LG00-3372	III	NA	Cultivar	USA	NA	NA
E-183	PI291309D	II	NA	Landrace	China	Heilongjiang	1963
E-215	PI438083	II	VIR 2506	Landrace	China	Northeast	1979
E-219	PI438500	III	Virginia	Landrace	USA	NA	1979
E-281	PI567746	IV	Pei xian da bai jiao	Landrace	China	Jiangsu	1993
E-363	PI090495N	IV	NA	Landrace	China	NA	NA
E-368	PI091120	II	NA	Landrace	China	Jilin	NA
E-402	PI417007	IV	Karasumame	Landrace	Japan	NA	1974
E-421	PI438312	III	Blaen Small	Landrace	Algeria	NA	1979
E-455	PI567398	IV	Lu lan dou	Landrace	China	shanxi	1993

## Sheet: S5
Supplementary Table S5. GWAS Results Linking SNPs to RSA Traits and GWAS candidate (GC) genes.
GWAS SNP	Model	Trait	P value	SNP Start	SNP End	Soy gene ID	Chromosome	geneID start	geneID stop	Strand	Gene distance	Gene Ontology	Best hit At Gene	At Gene Symbol	At define	At description	RNAexpr_Root	Cell_counts	Cell_Type_List	Color	Tissue
Gm06_17855981	Medians_Blink	Biomass_area	3.72e-11	17855980	17855982	Glyma.06G197200	Gm06	17854769	17855893	-	-88	GO:0005515	AT3G23880		F-box_and_associated_interaction_domains-containing_protein	F-box and associated interaction domains-containing protein;(source:Araport11) protein_coding	FALSE			turquoise	Root
Gm06_17855981	Medians_Blink	Biomass_area	3.72e-11	17855980	17855982	Glyma.06G197300	Gm06	17858853	17861476	-	2871	GO:0045905;GO:0045901;GO:0043022;GO:0006452;GO:0003746;GO:0003723	AT1G13950	ATELF5A-1;EIF-5A;EIF5A;ELF5A-1	eukaryotic_elongation_factor_5A-1	Encodes eukaryotic translation initiation factor 5A (EIF-5A).In mammalian cells it functions as a shuttle protein that translocates mRNA from the nucleus to cytoplasmic ribosomes. Overexpression results in an increase in both primary and secondary xylem formation. In RNAi suppressed lines, xylem formation is reduced. protein_coding EUKARYOTIC ELONGATION FACTOR 5A-1 (ELF5A-1) (EIF-5A);EUKARYOTIC E…	TRUE	10	Cortex, Pericycle, Vascular bundle/Xylem pole pericycle, Stele, Endodermis, Epidermis, Xylem, Vascular bundle, Metaphloem, Cluster13	brown	Leaf
Gm06_17855981	Medians_Blink	Biomass_area	3.72e-11	17855980	17855982	Glyma.06G197600	Gm06	17908489	17912658	+	52507	GO:0005515;GO:0006468;GO:0005524;GO:0004672	AT1G74360		Leucine-rich_repeat_protein_kinase_family_protein	NILR1 encodes a serine/threonine kinase involved in defense response to nematodes. protein_coding NEMATODE-INDUCED LRR-RLK 1 (NILR1) GERMINATION REPRESSION AND CELL EXPANSION RECEPTOR-LIKE KINASE (GRACE);NEMATODE-INDUCED LRR-RLK 1 (NILR1)	TRUE	10	Cortex, Pericycle, Vascular bundle/Xylem pole pericycle, Stele, Endodermis, Epidermis, Xylem, Vascular bundle, Metaphloem, Cluster13	turquoise	Root
Gm06_17855981	Medians_Blink	Biomass_area	3.72e-11	17855980	17855982	Glyma.06G197700	Gm06	17914239	17916414	+	58257		AT5G61190		putative_endonuclease_or_glycosyl_hydrolase_with_C2H2-type_zinc_finger_domain	putative endonuclease or glycosyl hydrolase with C2H2-type zinc finger domain-containing protein;(source:Araport11) protein_coding	FALSE	2	Cortex, Vascular bundle	grey	Leaf
Gm06_17855981	Medians_Blink	Biomass_area	3.72e-11	17855980	17855982	Glyma.06G197800	Gm06	17916751	17917534	-	60769		AT3G25400			dCTP pyrophosphatase-like protein;(source:Araport11) protein_coding	FALSE	0		turquoise	Root
Gm06_17855981	Medians_Blink	Biomass_area	3.72e-11	17855980	17855982	Glyma.06G197900	Gm06	17932807	17933421	-	76825	GO:0022857;GO:0016021	AT3G28050		nodulin_MtN21_/EamA-like_transporter_family_protein	nodulin MtN21-like transporter family protein protein_coding USUALLY MULTIPLE ACIDS MOVE IN AND OUT TRANSPORTERS 41 (UMAMIT41) USUALLY MULTIPLE ACIDS MOVE IN AND OUT TRANSPORTERS 41 (UMAMIT41)	FALSE	0
Gm06_17855981	Medians_Blink	Biomass_area	3.72e-11	17855980	17855982	Glyma.06G197933	Gm06	17935139	17935539	-	79157						FALSE
Gm06_17855981	Medians_Blink	Biomass_area	3.72e-11	17855980	17855982	Glyma.06G197966	Gm06	17936890	17937105	-	80908						FALSE
Gm06_17855981	Medians_Blink	Biomass_area	3.72e-11	17855980	17855982	Glyma.06G198000	Gm06	17939632	17945652	+	83650		AT1G13940		Plant_protein_of_unknown_function_(DUF863)	T-box transcription factor, putative (DUF863);(source:Araport11) protein_coding	FALSE	10	Cortex, Pericycle, Vascular bundle/Xylem pole pericycle, Stele, Endodermis, Epidermis, Xylem, Vascular bundle, Metaphloem, Cluster13	blue	Leaf
Gm06_17855981	Medians_Blink	Biomass_area	3.72e-11	17855980	17855982	Glyma.06G198100	Gm06	17950985	17954921	-	95003	GO:0055114;GO:0016491	AT5G07800		Flavin-binding_monooxygenase_family_protein	Flavin-binding monooxygenase family protein;(source:Araport11) protein_coding	FALSE	10	Cortex, Pericycle, Vascular bundle/Xylem pole pericycle, Stele, Endodermis, Epidermis, Xylem, Vascular bundle, Metaphloem, Cluster13	turquoise	Root
Gm06_17855981	Medians_Blink	Biomass_area	3.72e-11	17855980	17855982	Glyma.06G197100	Gm06	17759690	17760739	-	-95242	GO:0005515	AT3G06240		F-box_family_protein	F-box family protein;(source:Araport11) protein_coding	FALSE			darkmagenta	Unassigned
Gm06_17855981	Medians_Blink	Biomass_area	3.72e-11	17855980	17855982	Glyma.06G197000	Gm06	17741768	17742838	-	-113143	GO:0005515	AT3G06240		F-box_family_protein	F-box family protein;(source:Araport11) protein_coding	FALSE			grey	Leaf
Gm06_17855981	Medians_Blink	Biomass_area	3.72e-11	17855980	17855982	Glyma.06G196900	Gm06	17719096	17726665	-	-129316	GO:0006468;GO:0004672	AT1G18670	IBS1	Protein_kinase_superfamily_protein	Encodes a cyclin-dependent kinase-like protein with a ser/thr protein kinase domain and an N-terminal myristoylation sequence. Mutants in this gene are unable to express female sterility in response to beta-aminobutyric acid, as wild type plants do. protein_coding IMPAIRED IN BABA-INDUCED STERILITY 1 (IBS1) IMPAIRED IN BABA-INDUCED STERILITY 1 (IBS1)	FALSE	10	Cortex, Pericycle, Vascular bundle/Xylem pole pericycle, Stele, Endodermis, Epidermis, Xylem, Vascular bundle, Metaphloem, Cluster13	blue	Leaf
Gm06_17855981	Medians_Blink	Biomass_area	3.72e-11	17855980	17855982	Glyma.06G198300	Gm06	17989109	18001815	-	133127		AT5G16100			RWP-RK domain protein;(source:Araport11) protein_coding	FALSE	4	Cortex, Vascular bundle/Xylem pole pericycle, Stele, Cluster13	grey	Leaf
Gm06_17855981	Medians_Blink	Biomass_area	3.72e-11	17855980	17855982	Glyma.06G198401	Gm06	18004430	18004597	-	148448		AT2G47500		P-loop_nucleoside_triphosphate_hydrolases_superfamily_protein_with_CH_(Calponin_Homology)_domain	P-loop nucleoside triphosphate hydrolases superfamily protein with CH (Calponin Homology) domain-containing protein;(source:Araport11) protein_coding	TRUE			turquoise	Root
Gm06_17855981	Medians_Blink	Biomass_area	3.72e-11	17855980	17855982	Glyma.06G198500	Gm06	18008382	18008561	-	152400						FALSE			blue	Leaf
Gm06_17855981	Medians_Blink	Biomass_area	3.72e-11	17855980	17855982	Glyma.06G198550	Gm06	18009720	18011923	-	153738		AT3G52090	ATRPB13.6;NRPB11;NRPD11;NRPE11	DNA-directed_RNA_polymerase;_RBP11-like	Non-catalytic subunit common to nuclear DNA-dependent RNA polymerases II, IV and V; homologous to budding yeast RPB11 and the E. oli RNA polymerase alpha subunit. protein_coding (NRPB11) (NRPB11)	FALSE			brown	Leaf
Gm06_17855981	Medians_Blink	Biomass_area	3.72e-11	17855980	17855982	Glyma.06G198600	Gm06	18013438	18014655	-	157456		AT2G03430		Ankyrin_repeat_family_protein	Ankyrin repeat family protein;(source:Araport11) protein_coding	FALSE	10	Cortex, Pericycle, Vascular bundle/Xylem pole pericycle, Stele, Endodermis, Epidermis, Xylem, Vascular bundle, Metaphloem, Cluster13	brown	Leaf
Gm06_17855981	Medians_Blink	Biomass_area	3.72e-11	17855980	17855982	Glyma.06G196800	Gm06	17679258	17693839	-	-162142	GO:0045010;GO:0005884	AT5G07740		actin_binding	actin binding protein;(source:Araport11) protein_coding	FALSE	10	Cortex, Pericycle, Vascular bundle/Xylem pole pericycle, Stele, Endodermis, Epidermis, Xylem, Vascular bundle, Metaphloem, Cluster13	blue	Leaf
Gm06_17855981	Medians_Blink	Biomass_area	3.72e-11	17855980	17855982	Glyma.06G198800	Gm06	18030841	18032454	-	174859		AT5G02110	CYCD7;CYCD7;1	CYCLIN_D7;1	Encodes CYCLIN D7;1. Overexpression of CYCD7;1 induces cell proliferation and cell enlargement in the embryo and endosperm leading to overgrowth. protein_coding CYCLIN D7;1 (CYCD7;1) (CYCD7);CYCLIN D7;1 (CYCD7;1)	FALSE	0		tan	Leaf
Gm19_36670574	Medians_Blink	Biomass_area	9.25e-14	36670573	36670575	Glyma.19G109000	Gm19	36646143	36649797	+	-20777		AT2G39050		hydroxyproline-rich_glycoprotein_family_protein	Encodes a nucleocytoplasmic lectin that is capable of binding carbohydrates. It is involved in ABA mediated stomatal movement and increased expression is correlated with increased resistance to Pseudomonas syringae. protein_coding EUONYMUS LECTIN S3 (EULS3) (ARATHEULS3);EUONYMUS LECTIN S3 (EULS3)	FALSE	10	Cortex, Pericycle, Vascular bundle/Xylem pole pericycle, Stele, Endodermis, Epidermis, Xylem, Vascular bundle, Metaphloem, Cluster13	black	Hypocotyl
Gm19_36670574	Medians_Blink	Biomass_area	9.25e-14	36670573	36670575	Glyma.19G108800	Gm19	36627611	36630163	+	-40411	GO:0006355;GO:0003677	AT3G04070	anac047;NAC047	NAC_domain_containing_protein_47	NAC domain containing protein 47;(source:Araport11) protein_coding NAC DOMAIN CONTAINING PROTEIN 47 (NAC047) NAC DOMAIN CONTAINING PROTEIN 47 (anac047);SPEEDY HYPONASTIC GROWTH (SHYG);SPEEDY HYPONASTIC GROWTH (SHG);NAC DOMAIN CONTAINING PROTEIN 47 (NAC047)	FALSE	9	Cortex, Pericycle, Vascular bundle/Xylem pole pericycle, Stele, Endodermis, Epidermis, Xylem, Metaphloem, Cluster13	blue	Leaf
Gm19_36670574	Medians_Blink	Biomass_area	9.25e-14	36670573	36670575	Glyma.19G109100	Gm19	36711051	36714395	+	40476	GO:0006355;GO:0003677	AT5G18270	ANAC087	Arabidopsis_NAC_domain_containing_protein_87	NAC domain containing protein 87;(source:Araport11) protein_coding ARABIDOPSIS NAC DOMAIN CONTAINING PROTEIN 87 (ANAC087) ARABIDOPSIS NAC DOMAIN CONTAINING PROTEIN 87 (ANAC087)	TRUE	10	Cortex, Pericycle, Vascular bundle/Xylem pole pericycle, Stele, Endodermis, Epidermis, Xylem, Vascular bundle, Metaphloem, Cluster13	brown	Leaf
Gm19_36670574	Medians_Blink	Biomass_area	9.25e-14	36670573	36670575	Glyma.19G109200	Gm19	36720540	36728190	+	49965	GO:0003676	AT1G09230		RNA-binding_(RRM/RBD/RNP_motifs)_family_protein	Encodes a U12-type spliceosomal protein that is an indispensible component of the minor spliceosome and plays a crucial role in U12 intron splicing and plant development. protein_coding U11/U12-65K (U11/U12-65K) U11/U12-65K (U11/U12-65K)	FALSE	10	Cortex, Pericycle, Vascular bundle/Xylem pole pericycle, Stele, Endodermis, Epidermis, Xylem, Vascular bundle, Metaphloem, Cluster13	blue	Leaf
Gm19_36670574	Medians_Blink	Biomass_area	9.25e-14	36670573	36670575	Glyma.19G109267	Gm19	36729695	36731665	+	59120	GO:0043531	AT3G14470		NB-ARC_domain-containing_disease_resistance_protein	NB-ARC domain-containing disease resistance protein;(source:Araport11) protein_coding	FALSE	8	Cortex, Pericycle, Vascular bundle/Xylem pole pericycle, Stele, Endodermis, Epidermis, Xylem, Vascular bundle	grey	Leaf
Gm19_36670574	Medians_Blink	Biomass_area	9.25e-14	36670573	36670575	Glyma.19G109333	Gm19	36731666	36734697	+	61091		AT3G44480	cog1;RPP1	Disease_resistance_protein_(TIR-NBS-LRR_class)_family	Encodes a TIR-NB-LRR R-protein RPP1 that confers resistance to Peronospora parasitica (downy mildew). protein_coding RECOGNITION OF PERONOSPORA PARASITICA 1 (RPP1) RECOGNITION OF PERONOSPORA PARASITICA 1 (RPP1); (cog1)	FALSE	5	Cortex, Pericycle, Vascular bundle/Xylem pole pericycle, Stele, Endodermis	turquoise	Root
Gm19_36670574	Medians_Blink	Biomass_area	9.25e-14	36670573	36670575	Glyma.19G108600	Gm19	36599115	36602252	+	-68322		AT5G15010		Tetratricopeptide_repeat_(TPR)-like_superfamily_protein	Tetratricopeptide repeat (TPR)-like superfamily protein;(source:Araport11) protein_coding	FALSE	5	Cortex, Pericycle, Stele, Endodermis, Epidermis	blue	Leaf
Gm19_36670574	Medians_Blink	Biomass_area	9.25e-14	36670573	36670575	Glyma.19G109400	Gm19	36741208	36743820	+	70633	GO:0045454;GO:0015035;GO:0006662	AT1G08570	ACHT4	atypical_CYS__HIS_rich_thioredoxin_4	Encodes a member of the thioredoxin family protein. Located in the chloroplast. Shows high activity towards the chloroplast 2-Cys peroxiredoxin A, and poor activity towards the chloroplast NADP-malate dehydrogenase. The mRNA is cell-to-cell mobile. protein_coding ATYPICAL CYS HIS RICH THIOREDOXIN 4 (ACHT4) ATYPICAL CYS HIS RICH THIOREDOXIN 4 (ACHT4)	FALSE	10	Cortex, Pericycle, Vascular bundle/Xylem pole pericycle, Stele, Endodermis, Epidermis, Xylem, Vascular bundle, Metaphloem, Cluster13	pink	Leaf
Gm19_36670574	Medians_Blink	Biomass_area	9.25e-14	36670573	36670575	Glyma.19G108500	Gm19	36583835	36598478	+	-72096	GO:0016787	AT5G18280	APY2;ATAPY2	apyrase_2	Encodes an enzyme with ATPase and ADPase activity (an apyrase) that when mutated in combination with ATAPY1 causes a complete inhibition of pollen germination. protein_coding APYRASE 2 (APY2) APYRASE 2 (APY2);APYRASE 2 (ATAPY2)	FALSE	10	Cortex, Pericycle, Vascular bundle/Xylem pole pericycle, Stele, Endodermis, Epidermis, Xylem, Vascular bundle, Metaphloem, Cluster13	turquoise	Root
Gm19_36670574	Medians_Blink	Biomass_area	9.25e-14	36670573	36670575	Glyma.19G108400	Gm19	36568499	36578890	+	-91684	GO:0016020;GO:0006810;GO:0005215	AT5G18290	SIP1;2;SIP1B	Aquaporin-like_superfamily_protein	Belongs to a family of plant aquaporins.Similar to yeast and radish aquaporins. Located on ER protein_coding (SIP1;2) SMALL AND BASIC INTRINSIC PROTEIN 1B (SIP1b); (SIP1;2)	FALSE	10	Cortex, Pericycle, Vascular bundle/Xylem pole pericycle, Stele, Endodermis, Epidermis, Xylem, Vascular bundle, Metaphloem, Cluster13	yellow	Root
Gm19_36670574	Medians_Blink	Biomass_area	9.25e-14	36670573	36670575	Glyma.19G108300	Gm19	36554652	36558620	-	-111954	GO:0016020	AT5G06660		Protein_of_unknown_function_DUF106;_transmembrane	transmembrane/coiled-coil protein (Protein of unknown function DUF106, transmembrane);(source:Araport11) protein_coding	FALSE	10	Cortex, Pericycle, Vascular bundle/Xylem pole pericycle, Stele, Endodermis, Epidermis, Xylem, Vascular bundle, Metaphloem, Cluster13	blue	Leaf
Gm19_36670574	Medians_Blink	Biomass_area	9.25e-14	36670573	36670575	Glyma.19G109500	Gm19	36787648	36807147	+	117073	GO:0006355;GO:0005634	AT5G18230		transcription_regulator_NOT2/NOT3/NOT5_family_protein	transcription regulator NOT2/NOT3/NOT5 family protein;(source:Araport11) protein_coding (NOT3) (NOT3)	FALSE	10	Cortex, Pericycle, Vascular bundle/Xylem pole pericycle, Stele, Endodermis, Epidermis, Xylem, Vascular bundle, Metaphloem, Cluster13	pink	Leaf
Gm19_36670574	Medians_Blink	Biomass_area	9.25e-14	36670573	36670575	Glyma.19G108200	Gm19	36524156	36526950	+	-143624	GO:0048573;GO:0009909;GO:0008429	AT1G65480	FT	PEBP_(phosphatidylethanolamine-binding_protein)_family_protein	FT, together with LFY, promotes flowering and is antagonistic with its homologous gene, TERMINAL FLOWER1 (TFL1). Together with TSF, it plays an antagonistic role to TFL1 in the determination of inflorescence meristem identity. FT is expressed in leaves and is induced by long day treatment. Either the FT mRNA or protein is translocated to the shoot apex where it induces its own expression. Recent …	FALSE	0
Gm19_36670574	Medians_Blink	Biomass_area	9.25e-14	36670573	36670575	Glyma.19G109600	Gm19	36814895	36815347	+	144320	GO:0033177;GO:0015991;GO:0015078	ATCG00140		ATP_synthase_subunit_C_family_protein	ATPase III subunit protein_coding (ATPH) (ATPH)	FALSE	10	Cortex, Pericycle, Vascular bundle/Xylem pole pericycle, Stele, Endodermis, Epidermis, Xylem, Vascular bundle, Metaphloem, Cluster13	turquoise	Root
Gm19_36670574	Medians_Blink	Biomass_area	9.25e-14	36670573	36670575	Glyma.19G109700	Gm19	36830712	36831473	-	160137						FALSE
Gm19_36670574	Medians_Blink	Biomass_area	9.25e-14	36670573	36670575	Glyma.19G108100	Gm19	36505349	36507584	+	-162990	GO:0048573;GO:0009909;GO:0008429	AT1G65480	FT	PEBP_(phosphatidylethanolamine-binding_protein)_family_protein	FT, together with LFY, promotes flowering and is antagonistic with its homologous gene, TERMINAL FLOWER1 (TFL1). Together with TSF, it plays an antagonistic role to TFL1 in the determination of inflorescence meristem identity. FT is expressed in leaves and is induced by long day treatment. Either the FT mRNA or protein is translocated to the shoot apex where it induces its own expression. Recent …	FALSE
Gm19_36670574	Medians_Blink	Biomass_area	9.25e-14	36670573	36670575	Glyma.19G108000	Gm19	36498807	36500198	+	-170376						FALSE	2	Cortex, Endodermis	brown	Leaf
Gm19_36670574	Medians_Blink	Biomass_area	9.25e-14	36670573	36670575	Glyma.19G109901	Gm19	36843829	36845108	+	173254		AT3G04010		O-Glycosyl_hydrolases_family_17_protein	O-Glycosyl hydrolases family 17 protein;(source:Araport11) protein_coding	FALSE	1	Xylem	thistle	Unassigned
Gm19_36670574	Medians_Blink	Biomass_area	9.25e-14	36670573	36670575	Glyma.19G110000	Gm19	36870433	36871383	-	199858	GO:0005975;GO:0004553	AT1G11545	XTH8	xyloglucan_endotransglucosylase/hydrolase_8	xyloglucan endotransglucosylase/hydrolase 8;(source:Araport11) protein_coding XYLOGLUCAN ENDOTRANSGLUCOSYLASE/HYDROLASE 8 (XTH8) XYLOGLUCAN ENDOTRANSGLUCOSYLASE/HYDROLASE 8 (XTH8)	FALSE	0		grey	Leaf
Gm19_36670574	Medians_Blink	Biomass_area	9.25e-14	36670573	36670575	Glyma.19G110100	Gm19	36872623	36873965	-	202048						TRUE	1	Cluster13	turquoise	Root
Gm10_45938997	Medians_Blink	Convex_hull_area	4.42e-09	45938996	45938998	Glyma.10G228200	Gm10	45937342	45940535	+	0	GO:0005515	AT2G34930		disease_resistance_family_protein_/_LRR_family_protein	disease resistance family protein / LRR family protein;(source:Araport11) protein_coding	FALSE	3	Vascular bundle/Xylem pole pericycle, Stele, Epidermis	grey	Leaf
Gm10_45938997	Medians_Blink	Convex_hull_area	4.42e-09	45938996	45938998	Glyma.10G228301	Gm10	45943559	45945849	-	4561		AT3G49180	RID3	Transducin/WD40_repeat-like_superfamily_protein	Transducin/WD40 repeat-like superfamily protein;(source:Araport11) protein_coding ROOT INITIATION DEFECTIVE 3 (RID3) ROOT INITIATION DEFECTIVE 3 (RID3)	FALSE	0		grey	Leaf
Gm10_45938997	Medians_Blink	Convex_hull_area	4.42e-09	45938996	45938998	Glyma.10G228100	Gm10	45929524	45933954	+	-5043	GO:0005515	AT2G34930		disease_resistance_family_protein_/_LRR_family_protein	disease resistance family protein / LRR family protein;(source:Araport11) protein_coding	FALSE	1	Epidermis	brown	Leaf
Gm10_45938997	Medians_Blink	Convex_hull_area	4.42e-09	45938996	45938998	Glyma.10G228400	Gm10	45948153	45950774	+	9155						FALSE	0
Gm10_45938997	Medians_Blink	Convex_hull_area	4.42e-09	45938996	45938998	Glyma.10G228500	Gm10	45951393	45953596	-	12395	GO:0006468;GO:0005524;GO:0004672	AT1G21651		zinc_ion_binding	zinc ion binding protein;(source:Araport11) protein_coding	FALSE	2	Cortex, Epidermis	grey	Leaf
Gm10_45938997	Medians_Blink	Convex_hull_area	4.42e-09	45938996	45938998	Glyma.10G228600	Gm10	45955422	45958688	+	16424	GO:0005515	AT2G34930		disease_resistance_family_protein_/_LRR_family_protein	disease resistance family protein / LRR family protein;(source:Araport11) protein_coding	FALSE	1	Cortex	brown	Leaf
Gm10_45938997	Medians_Blink	Convex_hull_area	4.42e-09	45938996	45938998	Glyma.10G228000	Gm10	45915520	45918713	+	-20284	GO:0005515	AT2G34930		disease_resistance_family_protein_/_LRR_family_protein	disease resistance family protein / LRR family protein;(source:Araport11) protein_coding	FALSE	0		brown	Leaf
Gm10_45938997	Medians_Blink	Convex_hull_area	4.42e-09	45938996	45938998	Glyma.10G228700	Gm10	45961383	45967609	-	22385	GO:0005515	AT3G49660		Transducin/WD40_repeat-like_superfamily_protein	Encodes a structural core component of a COMPASS-like H3K4 histone methylation complex. protein_coding HUMAN WDR5 (WD40 REPEAT) HOMOLOG A (WDR5a) (AtWDR5a);HUMAN WDR5 (WD40 REPEAT) HOMOLOG A (WDR5a)	FALSE	10	Cortex, Pericycle, Vascular bundle/Xylem pole pericycle, Stele, Endodermis, Epidermis, Xylem, Vascular bundle, Metaphloem, Cluster13	blue	Leaf
Gm10_45938997	Medians_Blink	Convex_hull_area	4.42e-09	45938996	45938998	Glyma.10G227900	Gm10	45903480	45912924	+	-26073		AT5G52910	ATIM	timeless_family_protein	homolog of Drosophila timeless protein_coding TIMELESS (ATIM) TIMELESS (ATIM)	FALSE	10	Cortex, Pericycle, Vascular bundle/Xylem pole pericycle, Stele, Endodermis, Epidermis, Xylem, Vascular bundle, Metaphloem, Cluster13	green	Meristem
Gm10_45938997	Medians_Blink	Convex_hull_area	4.42e-09	45938996	45938998	Glyma.10G228800	Gm10	45968005	45970894	-	29007	GO:0005515	AT2G34930		disease_resistance_family_protein_/_LRR_family_protein	disease resistance family protein / LRR family protein;(source:Araport11) protein_coding	FALSE	0		skyblue2	Unassigned
Gm10_45938997	Medians_Blink	Convex_hull_area	4.42e-09	45938996	45938998	Glyma.10G228900	Gm10	45972461	45978982	-	33463	GO:0048544;GO:0006468;GO:0005524;GO:0004672	AT5G24080		Protein_kinase_superfamily_protein	Protein kinase superfamily protein;(source:Araport11) protein_coding	FALSE	6	Cortex, Pericycle, Vascular bundle/Xylem pole pericycle, Stele, Endodermis, Epidermis	blue	Leaf
Gm10_45938997	Medians_Blink	Convex_hull_area	4.42e-09	45938996	45938998	Glyma.10G227800	Gm10	45896326	45901396	-	-37601	GO:0030955;GO:0006096;GO:0004743;GO:0000287	AT5G52920	PKP-BETA1;PKP1;PKP2	plastidic_pyruvate_kinase_beta_subunit_1	encodes a dominant chloroplast pyruvate kinase beta subunit. Important for seed oil biosynthesis. Ubiquitously expressed, with significantly increased expression in maturing seeds. The mutant plant has wrinkled seeds, with a 50-70% reduction in seed fatty acid content. The mRNA is cell-to-cell mobile. protein_coding PLASTIDIC PYRUVATE KINASE BETA SUBUNIT 1 (PKP-BETA1) PLASTIDIAL PYRUVATE KINASE 1…	FALSE	10	Cortex, Pericycle, Vascular bundle/Xylem pole pericycle, Stele, Endodermis, Epidermis, Xylem, Vascular bundle, Metaphloem, Cluster13	brown	Leaf
Gm10_45938997	Medians_Blink	Convex_hull_area	4.42e-09	45938996	45938998	Glyma.10G229000	Gm10	45981280	45986221	+	42282	GO:0016020	AT5G60750		CAAX_amino_terminal_protease_family_protein	Encodes a chloroplast endoproteinase, SNOWY COTYLEDON4 (SCO4), required for photosynthetic acclimation to higher light intensities. protein_coding SNOWY COTYLEDON 4 (SCO4) SNOWY COTYLEDON 4 (SCO4)	FALSE	10	Cortex, Pericycle, Vascular bundle/Xylem pole pericycle, Stele, Endodermis, Epidermis, Xylem, Vascular bundle, Metaphloem, Cluster13	brown	Leaf
Gm10_45938997	Medians_Blink	Convex_hull_area	4.42e-09	45938996	45938998	Glyma.10G227700	Gm10	45892692	45893890	+	-45107	GO:0005975;GO:0004553	AT5G24090	ATCHIA;CHIA	chitinase_A	Chitinase A (class III) expressed exclusively under environmental stress conditions. Shown be a plant lysozyme involved in plant immunity. protein_coding CHITINASE A (CHIA) CHITINASE A (ATCHIA);LYSOZYME 1 (LYS1);CHITINASE A (CHIA)	TRUE	8	Cortex, Pericycle, Vascular bundle/Xylem pole pericycle, Stele, Endodermis, Epidermis, Xylem, Metaphloem	yellow	Root
Gm10_45938997	Medians_Blink	Convex_hull_area	4.42e-09	45938996	45938998	Glyma.10G229100	Gm10	45986609	45987666	+	47611						FALSE	2	Pericycle, Endodermis	grey	Leaf
Gm10_45938997	Medians_Blink	Convex_hull_area	4.42e-09	45938996	45938998	Glyma.10G229200	Gm10	45988288	45990900	+	49290		AT5G52900			Encodes a member of the MAKR (MEMBRANE-ASSOCIATED KINASE REGULATOR) gene family. MAKRs have putative kinase interacting motifs and membrane localization signals. Known members include: AT5G26230 (MAKR1), AT1G64080 (MAKR2), AT2G37380 (MAKR3), AT2G39370 (MAKR4), AT5G52870 (MAKR5) and AT5G52900 (MAKR6). protein_coding MEMBRANE-ASSOCIATED KINASE REGULATOR 6 (MAKR6) MEMBRANE-ASSOCIATED KINASE REGULATO…	FALSE	8	Cortex, Pericycle, Vascular bundle/Xylem pole pericycle, Stele, Endodermis, Epidermis, Xylem, Cluster13	brown	Leaf
Gm10_45938997	Medians_Blink	Convex_hull_area	4.42e-09	45938996	45938998	Glyma.10G227600	Gm10	45872980	45883703	+	-55294	GO:0030170;GO:0019752;GO:0016831	AT1G43710	emb1075	Pyridoxal_phosphate_(PLP)-dependent_transferases_superfamily_protein	Encodes a serine decarboxylase that is involved in ethanolamine metabolism and is crucial for plant growth. protein_coding EMBRYO DEFECTIVE 1075 (emb1075) EMBRYO DEFECTIVE 1075 (emb1075);ARABIDOPSIS THALIANA SERINE DECARBOXYLASE 1 (ATSDC1);SERINE DECARBOXYLASE 1 (SDC1)	FALSE	1	Metaphloem	darkseagreen4	Unassigned
Gm10_45938997	Medians_Blink	Convex_hull_area	4.42e-09	45938996	45938998	Glyma.10G229300	Gm10	45997972	46002023	-	58974	GO:0055085;GO:0016021;GO:0008308;GO:0006873	AT5G24030	SLAH3	SLAC1_homologue_3	Encodes a protein with ten predicted transmembrane helices. The SLAH3 protein has similarity to the SLAC1 protein involved in ion homeostasis in guard cells. Although it is not expressed in guard cells, it can complement an slac1-2 mutant suggesting that it performs a similar function. SLAH3:GFP localizes to the plasma membrane. protein_coding SLAC1 HOMOLOGUE 3 (SLAH3) SLAC1 HOMOLOGUE 3 (SLAH3)	TRUE	8	Cortex, Pericycle, Vascular bundle/Xylem pole pericycle, Stele, Endodermis, Epidermis, Xylem, Cluster13	turquoise	Root
Gm10_45938997	Medians_Blink	Convex_hull_area	4.42e-09	45938996	45938998	Glyma.10G227500	Gm10	45874575	45878832	-	-60165		AT3G04910	ATWNK1;WNK1;ZIK4	with_no_lysine_(K)_kinase_1	Serine/threonine protein kinase, whose transcription is regulated by circadian rhythm. protein_coding WITH NO LYSINE (K) KINASE 1 (WNK1) WITH NO LYSINE (K) KINASE 1 (WNK1); (ZIK4); (ATWNK1)	FALSE	0		midnightblue	Unassigned
Gm10_45938997	Medians_Blink	Convex_hull_area	4.42e-09	45938996	45938998	Glyma.10G227400	Gm10	45863495	45871591	+	-67406	GO:0055085;GO:0042626;GO:0016021;GO:0006810;GO:0005524;GO:0016887	AT3G59140	ATMRP14;MRP14	multidrug_resistance-associated_protein_14	member of MRP subfamily protein_coding ATP-BINDING CASSETTE C10 (ABCC10) MULTIDRUG RESISTANCE-ASSOCIATED PROTEIN 14 (ATMRP14);ATP-BINDING CASSETTE C10 (ABCC10);MULTIDRUG RESISTANCE-ASSOCIATED PROTEIN 14 (MRP14)	TRUE	10	Cortex, Pericycle, Vascular bundle/Xylem pole pericycle, Stele, Endodermis, Epidermis, Xylem, Vascular bundle, Metaphloem, Cluster13	turquoise	Root
Gm09_47116003	Medians_Blink	Dry_root_mass	8.09e-11	47116002	47116004	Glyma.09G245000	Gm09	47109312	47116095	+	0	GO:0003676	AT2G44710		RNA-binding_(RRM/RBD/RNP_motifs)_family_protein	RNA-binding (RRM/RBD/RNP motifs) family protein;(source:Araport11) protein_coding	FALSE	10	Cortex, Pericycle, Vascular bundle/Xylem pole pericycle, Stele, Endodermis, Epidermis, Xylem, Vascular bundle, Metaphloem, Cluster13	black	Hypocotyl
Gm09_47116003	Medians_Blink	Dry_root_mass	8.09e-11	47116002	47116004	Glyma.09G245100	Gm09	47115295	47115450	+	-553						TRUE			turquoise	Root
Gm09_47116003	Medians_Blink	Dry_root_mass	8.09e-11	47116002	47116004	Glyma.09G245200	Gm09	47118507	47124178	+	2503	GO:0006457;GO:0003755;GO:0000413	AT4G17070		peptidyl-prolyl_cis-trans_isomerases	peptidyl-prolyl cis-trans isomerase;(source:Araport11) protein_coding	FALSE	9	Cortex, Pericycle, Vascular bundle/Xylem pole pericycle, Stele, Endodermis, Epidermis, Xylem, Vascular bundle, Metaphloem	red	Meristem
Gm09_47116003	Medians_Blink	Dry_root_mass	8.09e-11	47116002	47116004	Glyma.09G244900	Gm09	47100049	47107113	+	-8890	GO:0009058;GO:0008676;GO:0008152;GO:0005737	AT1G79500	AtkdsA1	Aldolase-type_TIM_barrel_family_protein	Encodes a protein with 3-deoxy-8-phosphooctulonate synthase (KDOP synthase) activity which is involved in the biosynthesis of KDO, a component of cell wall rhamnogalacturonan II. protein_coding (AtkdsA1) (AtkdsA1);3-DEOXY-D-MANNO-OCTULOSONATE 8-PHOSPHATE SYNTHASE (KDO8PS); (ATKDO8PS)	FALSE	10	Cortex, Pericycle, Vascular bundle/Xylem pole pericycle, Stele, Endodermis, Epidermis, Xylem, Vascular bundle, Metaphloem, Cluster13	blue	Leaf
Gm09_47116003	Medians_Blink	Dry_root_mass	8.09e-11	47116002	47116004	Glyma.09G245300	Gm09	47125271	47128796	+	9267		AT2G44730		Alcohol_dehydrogenase_transcription_factor_Myb/SANT-like_family_protein	Alcohol dehydrogenase transcription factor Myb/SANT-like family protein;(source:Araport11) protein_coding	FALSE	10	Cortex, Pericycle, Vascular bundle/Xylem pole pericycle, Stele, Endodermis, Epidermis, Xylem, Vascular bundle, Metaphloem, Cluster13	black	Hypocotyl
Gm09_47116003	Medians_Blink	Dry_root_mass	8.09e-11	47116002	47116004	Glyma.09G245400	Gm09	47132883	47134762	+	16879		AT2G44740	CYCP4;1	cyclin_p4;1	cyclin p4;(source:Araport11) protein_coding CYCLIN P4;1 (CYCP4;1) CYCLIN P4;1 (CYCP4;1)	FALSE	10	Cortex, Pericycle, Vascular bundle/Xylem pole pericycle, Stele, Endodermis, Epidermis, Xylem, Vascular bundle, Metaphloem, Cluster13	grey	Leaf
Gm09_47116003	Medians_Blink	Dry_root_mass	8.09e-11	47116002	47116004	Glyma.09G244800	Gm09	47093515	47098228	+	-17775		AT2G44140		Peptidase_family_C54_protein	Autophagy protein that cleaves ATG8s. protein_coding AUTOPHAGY 4A (ATG4A) AUTOPHAGY 4A (ATG4A)	TRUE	9	Cortex, Pericycle, Vascular bundle/Xylem pole pericycle, Stele, Endodermis, Epidermis, Xylem, Vascular bundle, Metaphloem	turquoise	Root
Gm09_47116003	Medians_Blink	Dry_root_mass	8.09e-11	47116002	47116004	Glyma.09G244700	Gm09	47084878	47089897	-	-26106		AT5G23520		smr_(Small_MutS_Related)_domain-containing_protein	smr (Small MutS Related) domain-containing protein;(source:Araport11) protein_coding	TRUE	10	Cortex, Pericycle, Vascular bundle/Xylem pole pericycle, Stele, Endodermis, Epidermis, Xylem, Vascular bundle, Metaphloem, Cluster13	turquoise	Root
Gm09_47116003	Medians_Blink	Dry_root_mass	8.09e-11	47116002	47116004	Glyma.09G245500	Gm09	47142271	47145033	+	26267		AT2G20940		Protein_of_unknown_function_(DUF1279)	transmembrane protein, putative (DUF1279);(source:Araport11) protein_coding	FALSE	10	Cortex, Pericycle, Vascular bundle/Xylem pole pericycle, Stele, Endodermis, Epidermis, Xylem, Vascular bundle, Metaphloem, Cluster13	black	Hypocotyl
Gm09_47116003	Medians_Blink	Dry_root_mass	8.09e-11	47116002	47116004	Glyma.09G245600	Gm09	47145876	47148698	+	29872	GO:0006888;GO:0005801;GO:0005622	AT2G20930		SNARE-like_superfamily_protein	Part of multi-protein complex, acting as guanine nucleotide exchange factors (GEFs) and possibly as tethers, regulating intracellular trafficking. protein_coding (TTRAPPC2(L)) (TTRAPPC2(L))	FALSE	10	Cortex, Pericycle, Vascular bundle/Xylem pole pericycle, Stele, Endodermis, Epidermis, Xylem, Vascular bundle, Metaphloem, Cluster13	turquoise	Root
Gm09_47116003	Medians_Blink	Dry_root_mass	8.09e-11	47116002	47116004	Glyma.09G244600	Gm09	47083338	47084310	-	-31693						FALSE	0		brown	Leaf
Gm09_47116003	Medians_Blink	Dry_root_mass	8.09e-11	47116002	47116004	Glyma.09G245700	Gm09	47150514	47156680	+	34510	GO:0046034;GO:0015992;GO:0033178;GO:0016820;GO:0015991;GO:0005524	AT4G38510		ATPase;_V1_complex;_subunit_B_protein	One of three genes encoding the vacuolar ATP synthase subunit B1. The protein binds to and co-localizes with F-actin, bundles F-actin to form higher-order structure, and stabilizes actin filaments in vitro. protein_coding V-ATPASE B SUBUNIT 2 (VAB2) (ATVAB2);V-ATPASE B SUBUNIT 2 (VAB2)	FALSE	10	Cortex, Pericycle, Vascular bundle/Xylem pole pericycle, Stele, Endodermis, Epidermis, Xylem, Vascular bundle, Metaphloem, Cluster13	turquoise	Root
Gm09_47116003	Medians_Blink	Dry_root_mass	8.09e-11	47116002	47116004	Glyma.09G244501	Gm09	47077639	47077842	-	-38161						TRUE			turquoise	Root
Gm09_47116003	Medians_Blink	Dry_root_mass	8.09e-11	47116002	47116004	Glyma.09G244400	Gm09	47075120	47075710	+	-40293		AT1G55190	PRA1.F2;PRA7	PRA1_(Prenylated_rab_acceptor)_family_protein	PRA1 (Prenylated rab acceptor) family protein;(source:Araport11) protein_coding (PRA7) (PRA7);PRENYLATED RAB ACCEPTOR 1.F2 (PRA1.F2)	FALSE			grey	Leaf
Gm09_47116003	Medians_Blink	Dry_root_mass	8.09e-11	47116002	47116004	Glyma.09G244300	Gm09	47067854	47070244	-	-45759		AT1G71460		Pentatricopeptide_repeat_(PPR-like)_superfamily_protein	Pentatricopeptide repeat (PPR-like) superfamily protein;(source:Araport11) protein_coding	FALSE	7	Cortex, Pericycle, Vascular bundle/Xylem pole pericycle, Stele, Endodermis, Epidermis, Xylem	brown	Leaf
Gm09_47116003	Medians_Blink	Dry_root_mass	8.09e-11	47116002	47116004	Glyma.09G245800	Gm09	47164454	47165775	+	48450		AT4G17800		Predicted_AT-hook_DNA-binding_family_protein	Putative AT-hook DNA-binding family protein;(source:Araport11) protein_coding AT-HOOK MOTIF NUCLEAR LOCALIZED PROTEIN 23 (AHL23) AT-HOOK MOTIF NUCLEAR LOCALIZED PROTEIN 23 (AHL23)	TRUE	10	Cortex, Pericycle, Vascular bundle/Xylem pole pericycle, Stele, Endodermis, Epidermis, Xylem, Vascular bundle, Metaphloem, Cluster13	turquoise	Root
Gm09_47116003	Medians_Blink	Dry_root_mass	8.09e-11	47116002	47116004	Glyma.09G244200	Gm09	47064235	47067272	-	-48731	GO:0006412;GO:0005840;GO:0003735	AT3G26360		Ribosomal_protein_S21_family_protein	Ribosomal protein S21 family protein;(source:Araport11) protein_coding	FALSE	10	Cortex, Pericycle, Vascular bundle/Xylem pole pericycle, Stele, Endodermis, Epidermis, Xylem, Vascular bundle, Metaphloem, Cluster13	turquoise	Root
Gm09_47116003	Medians_Blink	Dry_root_mass	8.09e-11	47116002	47116004	Glyma.09G244100	Gm09	47062893	47064158	+	-51845	GO:0006355;GO:0005739;GO:0003690	AT3G18870		Mitochondrial_transcription_termination_factor_family_protein	Mitochondrial transcription termination factor family member. protein_coding (MTERF11) (MTERF11)	FALSE	0		grey	Leaf
Gm09_47116003	Medians_Blink	Dry_root_mass	8.09e-11	47116002	47116004	Glyma.09G245900	Gm09	47174057	47175877	+	58053	GO:0016758;GO:0008152	AT1G05680	UGT74E2	Uridine_diphosphate_glycosyltransferase_74E2	Encodes a UDP-glucosyltransferase, UGT74E2, that acts on IBA (indole-3-butyric acid) and affects auxin homeostasis. The transcript and protein levels of this enzyme are strongly induced by H2O2 and may allow integration of ROS (reactive oxygen species) and auxin signaling. This enzyme can also transfer glycosyl groups to several compounds related to the explosive TNT when this synthetic compound …	FALSE	2	Cortex, Pericycle	turquoise	Root
Gm09_47116003	Medians_Blink	Dry_root_mass	8.09e-11	47116002	47116004	Glyma.09G244000	Gm09	47049370	47056748	-	-59255	GO:0043565;GO:0006355;GO:0003700	AT2G44745		WRKY_family_transcription_factor	WRKY gene family member involved in vascular/pith development. protein_coding WRKY DNA-BINDING PROTEIN 12 (WRKY12) (ATWRKY12);WRKY DNA-BINDING PROTEIN 12 (WRKY12)	FALSE	8	Cortex, Pericycle, Vascular bundle/Xylem pole pericycle, Stele, Epidermis, Xylem, Vascular bundle, Metaphloem	purple	Hypocotyl
Gm11_31034808	Medians_Blink	Width	9.4e-09	31034807	31034809	Glyma.11G176301	Gm11	31054276	31057109	+	19467	GO:0005515;GO:0006468;GO:0005524;GO:0004672	AT2G26730		Leucine-rich_repeat_protein_kinase_family_protein	Leucine-rich repeat protein kinase family protein;(source:Araport11) protein_coding	TRUE	6	Cortex, Pericycle, Vascular bundle/Xylem pole pericycle, Stele, Endodermis, Epidermis	turquoise	Root
Gm11_31034808	Medians_Blink	Width	9.4e-09	31034807	31034809	Glyma.11G176302	Gm11	31203782	31207299	-	168973	GO:0022857;GO:0016021	AT3G28050		nodulin_MtN21_/EamA-like_transporter_family_protein	nodulin MtN21-like transporter family protein protein_coding USUALLY MULTIPLE ACIDS MOVE IN AND OUT TRANSPORTERS 41 (UMAMIT41) USUALLY MULTIPLE ACIDS MOVE IN AND OUT TRANSPORTERS 41 (UMAMIT41)	TRUE	10	Cortex, Pericycle, Vascular bundle/Xylem pole pericycle, Stele, Endodermis, Epidermis, Xylem, Vascular bundle, Metaphloem, Cluster13	turquoise	Root
Gm11_31034808	Medians_Blink	Width	9.4e-09	31034807	31034809	Glyma.11G176303	Gm11	31211389	31213756	+	176580	GO:0046983	AT4G09660			zinc finger MYM-type-like protein;(source:Araport11) protein_coding	FALSE			turquoise	Root
Gm11_31034808	Medians_Blink	Width	9.4e-09	31034807	31034809	Glyma.11G176306	Gm11	31242674	31243901	+	207865		AT4G11720	GCS1;HAP2	hapless_2	Encodes HAP2 with the following predicted motifs: an N-terminal secretion signal, a single transmembrane domain and a C-terminal histidine-rich domain. HAP2 is expressed only in the haploid sperm and is required for pollen tube guidance and fertilization. Predominantly localized to sperm endoplasmic reticulum membranes. May also reside in other endomembranes, including the plasma membrane. Target…	FALSE	0		blue2	Unassigned
Gm11_31034808	Medians_Blink	Width	9.4e-09	31034807	31034809	Glyma.11G176307	Gm11	31247597	31248464	-	212788	GO:0055114;GO:0020037;GO:0016705;GO:0005506	AT1G12740	CYP87A2	cytochrome_P450;_family_87;_subfamily_A;_polypeptide_2	encodes a protein with cytochrome P450 domain protein_coding CYTOCHROME P450, FAMILY 87, SUBFAMILY A, POLYPEPTIDE 2 (CYP87A2) CYTOCHROME P450, FAMILY 87, SUBFAMILY A, POLYPEPTIDE 2 (CYP87A2)	TRUE			turquoise	Root
Gm09_7083962	Medians_Blink	lr_length	1.1e-09	7083961	7083963	Glyma.09G069900	Gm09	7076526	7080338	+	-3624	GO:0006468;GO:0004672	AT2G05940		Protein_kinase_superfamily_protein	Encodes a receptor-like cytoplasmic kinase that phosphorylates the host target RIN4, leading to the activation of a plant innate immune receptor RPM1. protein_coding RPM1-INDUCED PROTEIN KINASE (RIPK) PBS1-LIKE 14 (PBL14);RPM1-INDUCED PROTEIN KINASE (RIPK)	TRUE	6	Cortex, Pericycle, Stele, Endodermis, Epidermis, Cluster13	yellow	Root
Gm09_7083962	Medians_Blink	lr_length	1.1e-09	7083961	7083963	Glyma.09G070000	Gm09	7106650	7109590	+	22687	GO:0006508;GO:0004252	AT2G05920		Subtilase_family_protein	Subtilase family protein;(source:Araport11) protein_coding SUBTILASE 1.8 (SBT1.8) SUBTILASE 1.8 (SBT1.8)	FALSE	9	Cortex, Pericycle, Vascular bundle/Xylem pole pericycle, Stele, Endodermis, Epidermis, Xylem, Vascular bundle, Metaphloem	brown	Leaf
Gm09_7083962	Medians_Blink	lr_length	1.1e-09	7083961	7083963	Glyma.09G070100	Gm09	7110815	7114565	-	26852	GO:0007186;GO:0005834;GO:0004871	AT5G20635			Encodes an atypical heterotrimeric G-protein gamma-subunit involved in guard cell K+-channel regulation and morphological development. protein_coding ARABIDOPSIS G PROTEIN GAMMA SUBUNIT 3 (AGG3) ARABIDOPSIS G PROTEIN GAMMA SUBUNIT 3 (AGG3)	TRUE	9	Cortex, Pericycle, Vascular bundle/Xylem pole pericycle, Stele, Epidermis, Xylem, Vascular bundle, Metaphloem, Cluster13	turquoise	Root
Gm09_7083962	Medians_Blink	lr_length	1.1e-09	7083961	7083963	Glyma.09G069800	Gm09	7048101	7053370	-	-30592	GO:0008234;GO:0006508	AT3G45310		Cysteine_proteinases_superfamily_protein	Cysteine proteinases superfamily protein;(source:Araport11) protein_coding	FALSE	10	Cortex, Pericycle, Vascular bundle/Xylem pole pericycle, Stele, Endodermis, Epidermis, Xylem, Vascular bundle, Metaphloem, Cluster13	turquoise	Root
Gm09_7083962	Medians_Blink	lr_length	1.1e-09	7083961	7083963	Glyma.09G070200	Gm09	7116273	7117991	+	32310		AT2G05910		Protein_of_unknown_function_(DUF567)	LURP-one-like protein (DUF567);(source:Araport11) protein_coding	TRUE	5	Cortex, Pericycle, Stele, Epidermis, Vascular bundle	turquoise	Root
Gm09_7083962	Medians_Blink	lr_length	1.1e-09	7083961	7083963	Glyma.09G069700	Gm09	7040977	7046513	-	-37449		AT2G06005	FIP1	FRIGIDA_interacting_protein_1	Encodes one of the FRI interacting proteins: FRIGIDA INTERACTING PROTEIN 1 (FIP1)/At2g06005, FIP2/ At4g17060. FRI (At4G00650) is a major determinant of natural variation in Arabidopsis flowering time. protein_coding FRIGIDA INTERACTING PROTEIN 1 (FIP1) FRIGIDA INTERACTING PROTEIN 1 (FIP1)	TRUE	10	Cortex, Pericycle, Vascular bundle/Xylem pole pericycle, Stele, Endodermis, Epidermis, Xylem, Vascular bundle, Metaphloem, Cluster13	turquoise	Root
Gm09_7083962	Medians_Blink	lr_length	1.1e-09	7083961	7083963	Glyma.09G070300	Gm09	7137689	7143865	+	53726	GO:0055114;GO:0016491;GO:0008152	AT1G54100	ALDH7B4	aldehyde_dehydrogenase_7B4	Aldehyde dehydrogenase protein_coding ALDEHYDE DEHYDROGENASE 7B4 (ALDH7B4) ALDEHYDE DEHYDROGENASE 7B4 (ALDH7B4)	TRUE	10	Cortex, Pericycle, Vascular bundle/Xylem pole pericycle, Stele, Endodermis, Epidermis, Xylem, Vascular bundle, Metaphloem, Cluster13	turquoise	Root
Gm09_7083962	Medians_Blink	lr_length	1.1e-09	7083961	7083963	Glyma.09G070400	Gm09	7144443	7148265	+	60480	GO:0016844;GO:0009058	AT3G51420	ATSSL4;SSL4	strictosidine_synthase-like_4	Although this enzyme is predicted to encode a strictosidine synthase (SS), it lacks a conserved catalytic glutamate residue found in active SS enzymes and it is not expected to have SS activity. protein_coding STRICTOSIDINE SYNTHASE-LIKE 4 (SSL4) STRICTOSIDINE SYNTHASE-LIKE 4 (SSL4);STRICTOSIDINE SYNTHASE-LIKE 4 (ATSSL4)	FALSE	0		grey	Leaf
Gm09_7083962	Medians_Blink	lr_length	1.1e-09	7083961	7083963	Glyma.09G069500	Gm09	7018553	7021936	-	-62026	GO:0008080	AT2G06025		Acyl-CoA_N-acyltransferases_(NAT)_superfamily_protein	Acyl-CoA N-acyltransferases (NAT) superfamily protein;(source:Araport11) protein_coding GCN5&#8208;RELATED N&#8208;ACETYLTRANSFERASE 6 (GNAT6) GCN5&#8208;RELATED N&#8208;ACETYLTRANSFERASE 6 (GNAT6)	TRUE	10	Cortex, Pericycle, Vascular bundle/Xylem pole pericycle, Stele, Endodermis, Epidermis, Xylem, Vascular bundle, Metaphloem, Cluster13	turquoise	Root
Gm09_7083962	Medians_Blink	lr_length	1.1e-09	7083961	7083963	Glyma.09G069401	Gm09	7014187	7016916	+	-67046		AT2G06040			Contributes to UV tolerance through nucleotide excision repair. protein_coding RADIATION SENSITIVE 7A (RAD7A) RADIATION SENSITIVE 7A (RAD7A)	FALSE	2	Endodermis, Epidermis	lightgreen	Unassigned
Gm09_7083962	Medians_Blink	lr_length	1.1e-09	7083961	7083963	Glyma.09G070500	Gm09	7151496	7156551	+	67533	GO:0016844;GO:0009058	AT3G51420	ATSSL4;SSL4	strictosidine_synthase-like_4	Although this enzyme is predicted to encode a strictosidine synthase (SS), it lacks a conserved catalytic glutamate residue found in active SS enzymes and it is not expected to have SS activity. protein_coding STRICTOSIDINE SYNTHASE-LIKE 4 (SSL4) STRICTOSIDINE SYNTHASE-LIKE 4 (SSL4);STRICTOSIDINE SYNTHASE-LIKE 4 (ATSSL4)	FALSE	6	Cortex, Stele, Epidermis, Vascular bundle, Metaphloem, Cluster13	brown	Leaf
Gm09_7083962	Medians_Blink	lr_length	1.1e-09	7083961	7083963	Glyma.09G070600	Gm09	7157459	7160951	-	73496		AT4G35740	ATRECQ3;RecQl3	DEAD/DEAH_box_RNA_helicase_family_protein_	Encodes RECQ3, an ATP-dependent helicase. protein_coding (RecQl3) A. THALIANA RECQ HELICASE 3 (ATRECQ3); (RecQl3)	TRUE	9	Cortex, Pericycle, Vascular bundle/Xylem pole pericycle, Stele, Endodermis, Epidermis, Xylem, Vascular bundle, Cluster13	turquoise	Root
Gm09_7083962	Medians_Blink	lr_length	1.1e-09	7083961	7083963	Glyma.09G069300	Gm09	7003490	7009649	-	-74313		AT5G35570		O-fucosyltransferase_family_protein	O-fucosyltransferase family protein;(source:Araport11) protein_coding	FALSE	5	Cortex, Pericycle, Vascular bundle/Xylem pole pericycle, Stele, Epidermis	grey	Leaf
Gm09_7083962	Medians_Blink	lr_length	1.1e-09	7083961	7083963	Glyma.09G070650	Gm09	7160985	7171480	-	77022	GO:0005524;GO:0003676	AT4G35740	ATRECQ3;RecQl3	DEAD/DEAH_box_RNA_helicase_family_protein_	Encodes RECQ3, an ATP-dependent helicase. protein_coding (RecQl3) A. THALIANA RECQ HELICASE 3 (ATRECQ3); (RecQl3)	FALSE	10	Cortex, Pericycle, Vascular bundle/Xylem pole pericycle, Stele, Endodermis, Epidermis, Xylem, Vascular bundle, Metaphloem, Cluster13	blue	Leaf
Gm09_7083962	Medians_Blink	lr_length	1.1e-09	7083961	7083963	Glyma.09G069200	Gm09	7002473	7003231	-	-80731		AT5G35570		O-fucosyltransferase_family_protein	O-fucosyltransferase family protein;(source:Araport11) protein_coding	FALSE			lavenderblush3	Unassigned
Gm09_7083962	Medians_Blink	lr_length	1.1e-09	7083961	7083963	Glyma.09G069100	Gm09	6993870	6995964	-	-87998		AT5G35570		O-fucosyltransferase_family_protein	O-fucosyltransferase family protein;(source:Araport11) protein_coding	FALSE	1	Cortex	brown	Leaf
Gm09_7083962	Medians_Blink	lr_length	1.1e-09	7083961	7083963	Glyma.09G070700	Gm09	7173910	7178014	-	89947	GO:0044237	AT2G05830		NagB/RpiA/CoA_transferase-like_superfamily_protein	Encodes a 5-methylthioribose-1-phosphate isomerase. protein_coding 5-METHYLTHIORIBOSE KINASE 1 (MTI1) 5-METHYLTHIORIBOSE-1-PHOSPHATE-ISOMERASE1 (MTI1);5-METHYLTHIORIBOSE KINASE 1 (MTI1)	TRUE	10	Cortex, Pericycle, Vascular bundle/Xylem pole pericycle, Stele, Endodermis, Epidermis, Xylem, Vascular bundle, Metaphloem, Cluster13	turquoise	Root
Gm09_7083962	Medians_Blink	lr_length	1.1e-09	7083961	7083963	Glyma.09G069000	Gm09	6988552	6992234	+	-91728		AT5G45550		Mob1/phocein_family_protein	Encodes a gene product involved in both sporogenesis and gametogenesis and is required for the normal progression of megasporogenesis and microsporogenesis. Additional alleles were isolated in a screen for enhancers of PID and genetic analysis indicates a role for MOB1A in auxin mediated signaling. protein_coding MOB1-LIKE (MOB1-like) (MOB1A);MOB1-LIKE (MOB1-like)	FALSE	10	Cortex, Pericycle, Vascular bundle/Xylem pole pericycle, Stele, Endodermis, Epidermis, Xylem, Vascular bundle, Metaphloem, Cluster13	yellow	Root
Gm09_7083962	Medians_Blink	lr_length	1.1e-09	7083961	7083963	Glyma.09G068866	Gm09	6986124	6986699	+	-97263						FALSE	0		darkgrey	Unassigned
Gm09_7083962	Medians_Blink	lr_length	1.1e-09	7083961	7083963	Glyma.09G068900	Gm09	6986208	6986384	-	-97578						FALSE			brown	Leaf
Gm12_26099549	Medians_Blink	pr_length	2.34e-11	26099548	26099550	Glyma.12G158000	Gm12	26129136	26137776	+	29586	GO:0003677	AT3G18380		sequence-specific_DNA_binding_transcription_factors;sequence-specific_DNA_binding	DNA-BINDING TRANSCRIPTION FACTOR 2;(source:Araport11) protein_coding SAWADEE HOMEODOMAIN HOMOLOG 2 (SHH2) DNA-BINDING TRANSCRIPTION FACTOR 2 (DTF2);SAWADEE HOMEODOMAIN HOMOLOG 2 (SHH2)	TRUE	10	Cortex, Pericycle, Vascular bundle/Xylem pole pericycle, Stele, Endodermis, Epidermis, Xylem, Vascular bundle, Metaphloem, Cluster13	turquoise	Root
Gm12_26099549	Medians_Blink	pr_length	2.34e-11	26099548	26099550	Glyma.12G157700	Gm12	25809106	25827199	-	-272350	GO:0008270;GO:0003677	AT3G14890		phosphoesterase	Encodes a base excision repair protein that, together with APE2, it plays overlapping roles in the maintenance of epigenome and genome stability in plants. protein_coding ZINC 4 FINGER DNA 3-PHOSPHOESTERASE (ZDP) ZINC 4 FINGER DNA 3-PHOSPHOESTERASE (ZDP)	TRUE	10	Cortex, Pericycle, Vascular bundle/Xylem pole pericycle, Stele, Endodermis, Epidermis, Xylem, Vascular bundle, Metaphloem, Cluster13	blue	Leaf
Gm12_26099549	Medians_Blink	pr_length	2.34e-11	26099548	26099550	Glyma.12G158300	Gm12	26388299	26389592	-	288749	GO:0030532;GO:0008380	AT2G47640		Small_nuclear_ribonucleoprotein_family_protein	Small nuclear ribonucleoprotein family protein;(source:Araport11) protein_coding	FALSE	0
Gm12_26099549	Medians_Blink	pr_length	2.34e-11	26099548	26099550	Glyma.12G157600	Gm12	25800783	25806667	-	-292882	GO:0043087	AT3G14910			Rab3 GTPase-activating protein non-catalytic subunit;(source:Araport11) protein_coding	FALSE	10	Cortex, Pericycle, Vascular bundle/Xylem pole pericycle, Stele, Endodermis, Epidermis, Xylem, Vascular bundle, Metaphloem, Cluster13	turquoise	Root
Gm02_45524181	Medians_Blink	pr_tip_depth	9.71e-09	45524180	45524182	Glyma.02G249400	Gm02	45521360	45522742	-	-1439		AT1G75250	ATRL6;RL6;RSM3	RAD-like_6	RAD-like 6;(source:Araport11) protein_coding RAD-LIKE 6 (RL6) RAD-LIKE 6 (ATRL6);RADIALIS-LIKE SANT/MYB 3 (RSM3);RAD-LIKE 6 (RL6)	FALSE			magenta	Leaf
Gm02_45524181	Medians_Blink	pr_tip_depth	9.71e-09	45524180	45524182	Glyma.02G249300	Gm02	45511996	45514666	-	-9515	GO:0016746;GO:0008152	AT3G11430	ATGPAT5;GPAT5	glycerol-3-phosphate_acyltransferase_5	sn-glycerol-3-phosphate 2-O-acyltransferas, involved in the biosynthesis of suberin polyester. protein_coding GLYCEROL-3-PHOSPHATE SN-2-ACYLTRANSFERASE 5 (GPAT5) GLYCEROL-3-PHOSPHATE SN-2-ACYLTRANSFERASE 5 (GPAT5);GLYCEROL-3-PHOSPHATE SN-2-ACYLTRANSFERASE 5 (ATGPAT5)	TRUE	2	Vascular bundle/Xylem pole pericycle, Endodermis	turquoise	Root
Gm02_45524181	Medians_Blink	pr_tip_depth	9.71e-09	45524180	45524182	Glyma.02G249500	Gm02	45534384	45536929	-	10202		AT5G02140		Pathogenesis-related_thaumatin_superfamily_protein	Pollen expressed thaumatin like protein. protein_coding (GCTLP1) (GCTLP1)	TRUE	8	Cortex, Pericycle, Vascular bundle/Xylem pole pericycle, Stele, Endodermis, Epidermis, Metaphloem, Cluster13	brown	Leaf
Gm02_45524181	Medians_Blink	pr_tip_depth	9.71e-09	45524180	45524182	Glyma.02G249200	Gm02	45508662	45509010	-	-15171						FALSE			magenta	Leaf
Gm02_45524181	Medians_Blink	pr_tip_depth	9.71e-09	45524180	45524182	Glyma.02G249100	Gm02	45505775	45507722	-	-16459	GO:0008270;GO:0005515	AT2G39720	RHC2A	RING-H2_finger_C2A	Encodes a putative RING-H2 finger protein RHC2a. protein_coding RING-H2 FINGER C2A (RHC2A) RING-H2 FINGER C2A (RHC2A);BCA2A ZINC FINGER ATL 11 (BTL11)	FALSE	4	Cortex, Pericycle, Vascular bundle/Xylem pole pericycle, Epidermis	red	Meristem
Gm02_45524181	Medians_Blink	pr_tip_depth	9.71e-09	45524180	45524182	Glyma.02G249600	Gm02	45542993	45546949	-	18811	GO:0005524	AT2G39730	RCA	rubisco_activase	Rubisco activase, a nuclear-encoded chloroplast protein that consists of two isoforms arising from alternative splicing in most plants. Required for the light activation of rubisco. Involved in jasmonate-induced leaf senescence. protein_coding RUBISCO ACTIVASE (RCA) RUBISCO ACTIVASE (RCA)	FALSE	8	Cortex, Pericycle, Vascular bundle/Xylem pole pericycle, Stele, Endodermis, Epidermis, Xylem, Metaphloem	turquoise	Root
Gm02_45524181	Medians_Blink	pr_tip_depth	9.71e-09	45524180	45524182	Glyma.02G249700	Gm02	45552810	45553734	+	28628		AT5G06080	LBD33	LOB_domain-containing_protein_33	LOB domain-containing protein 33;(source:Araport11) protein_coding LOB DOMAIN-CONTAINING PROTEIN 33 (LBD33) LOB DOMAIN-CONTAINING PROTEIN 33 (LBD33)	FALSE			antiquewhite4	Unassigned
Gm02_45524181	Medians_Blink	pr_tip_depth	9.71e-09	45524180	45524182	Glyma.02G249000	Gm02	45491794	45493564	-	-30617	GO:0006508;GO:0004190	AT2G39710		Eukaryotic_aspartyl_protease_family_protein	Encodes a Cysteine-rich peptide (CRP) family protein protein_coding	FALSE	1	Cortex	red	Meristem
Gm02_45524181	Medians_Blink	pr_tip_depth	9.71e-09	45524180	45524182	Glyma.02G249800	Gm02	45562523	45565115	-	38341		AT4G14465	AHL20	AT-hook_motif_nuclear-localized_protein_20	AT-hook protein. Overexpression results in early flowering in short and long days. protein_coding AT-HOOK MOTIF NUCLEAR-LOCALIZED PROTEIN 20 (AHL20) AT-HOOK MOTIF NUCLEAR-LOCALIZED PROTEIN 20 (AHL20)	FALSE			green	Meristem
Gm02_45524181	Medians_Blink	pr_tip_depth	9.71e-09	45524180	45524182	Glyma.02G248900	Gm02	45480813	45481067	+	-43114		AT2G39705	DVL11;RTFL8	ROTUNDIFOLIA_like_8	ROTUNDIFOLIA like 8;(source:Araport11) protein_coding ROTUNDIFOLIA LIKE 8 (RTFL8) DEVIL 11 (DVL11);ROTUNDIFOLIA LIKE 8 (RTFL8)	FALSE			yellow	Root
Gm02_45524181	Medians_Blink	pr_tip_depth	9.71e-09	45524180	45524182	Glyma.02G249900	Gm02	45572921	45573667	+	48739						FALSE	0		darkolivegreen	Unassigned
Gm02_45524181	Medians_Blink	pr_tip_depth	9.71e-09	45524180	45524182	Glyma.02G250000	Gm02	45577371	45584546	+	53189	GO:0032012;GO:0005086	AT1G13980	EMB30;GN;VAN7	sec7_domain-containing_protein	Encodes a GDP/GTP exchange factor for small G-proteins of the ADP ribosylation factor (RAF) class, and as regulator of intracellular trafficking. Homologous to Sec7p and YEC2 from yeast. Involved in the specification of apical-basal pattern formation. Essential for cell division, expansion and adhesion. It appears that heteotypic binding between the DCB and C-terminal domains of two GNOM proteins…	FALSE	9	Cortex, Pericycle, Vascular bundle/Xylem pole pericycle, Stele, Endodermis, Epidermis, Xylem, Vascular bundle, Cluster13	brown	Leaf
Gm02_45524181	Medians_Blink	pr_tip_depth	9.71e-09	45524180	45524182	Glyma.02G250100	Gm02	45591382	45592634	+	67200		AT2G37740	ATZFP10;ZFP10	zinc-finger_protein_10	zinc-finger protein 10;(source:Araport11) protein_coding ZINC-FINGER PROTEIN 10 (ZFP10) ZINC-FINGER PROTEIN 10 (ZFP10);ZINC-FINGER PROTEIN 10 (ATZFP10)	FALSE	0		red	Meristem
Gm02_45524181	Medians_Blink	pr_tip_depth	9.71e-09	45524180	45524182	Glyma.02G248800	Gm02	45440639	45441361	+	-82820		AT5G02220			cyclin-dependent kinase inhibitor;(source:Araport11) protein_coding SIAMESE-RELATED 4 (SMR4) SIAMESE-RELATED 4 (SMR4)	FALSE	0		grey	Leaf
Gm02_45524181	Medians_Blink	pr_tip_depth	9.71e-09	45524180	45524182	Glyma.02G250200	Gm02	45608947	45611078	+	84765	GO:0006470;GO:0004722	AT3G11410	AHG3;ATPP2CA;PP2CA	protein_phosphatase_2CA	Encodes protein phosphatase 2C. Negative regulator of ABA signalling. Expressed in seeds during germination. mRNA up-regulated by drought and ABA. protein_coding PROTEIN PHOSPHATASE 2CA (PP2CA) PROTEIN PHOSPHATASE 2CA (PP2CA);ABA-HYPERSENSITIVE GERMINATION 3 (AHG3);ARABIDOPSIS THALIANA PROTEIN PHOSPHATASE 2CA (ATPP2CA)	FALSE	10	Cortex, Pericycle, Vascular bundle/Xylem pole pericycle, Stele, Endodermis, Epidermis, Xylem, Vascular bundle, Metaphloem, Cluster13	blue	Leaf
Gm02_45524181	Medians_Blink	pr_tip_depth	9.71e-09	45524180	45524182	Glyma.02G248700	Gm02	45432516	45438395	-	-85786	GO:0031011;GO:0006355;GO:0006281	AT3G12380	ARP5;ATARP5	actin-related_protein_5	Encodes a gene similar to actin-related proteins in other organisms. Member of nuclear ARP gene family. protein_coding ACTIN-RELATED PROTEIN 5 (ARP5) ACTIN-RELATED PROTEIN 5 (ARP5)	TRUE	10	Cortex, Pericycle, Vascular bundle/Xylem pole pericycle, Stele, Endodermis, Epidermis, Xylem, Vascular bundle, Metaphloem, Cluster13	blue	Leaf
Gm02_45524181	Medians_Blink	pr_tip_depth	9.71e-09	45524180	45524182	Glyma.02G250300	Gm02	45612178	45615008	-	87996		AT3G14900			hypothetical protein;(source:Araport11) protein_coding EMBRYO DEFECTIVE 3120 (EMB3120) EMBRYO DEFECTIVE 3120 (EMB3120)	FALSE	9	Cortex, Pericycle, Vascular bundle/Xylem pole pericycle, Stele, Endodermis, Epidermis, Xylem, Vascular bundle, Metaphloem	blue	Leaf
Gm02_45524181	Medians_Blink	pr_tip_depth	9.71e-09	45524180	45524182	Glyma.02G250400	Gm02	45616441	45621206	-	92259	GO:0008168	AT2G39750		S-adenosyl-L-methionine-dependent_methyltransferases_superfamily_protein	S-adenosyl-L-methionine-dependent methyltransferases superfamily protein;(source:Araport11) protein_coding	FALSE	10	Cortex, Pericycle, Vascular bundle/Xylem pole pericycle, Stele, Endodermis, Epidermis, Xylem, Vascular bundle, Metaphloem, Cluster13	brown	Leaf
Gm02_45524181	Medians_Blink	pr_tip_depth	9.71e-09	45524180	45524182	Glyma.02G248600	Gm02	45431010	45431240	+	-92941		AT5G13830		FtsJ-like_methyltransferase_family_protein	FtsJ-like methyltransferase family protein;(source:Araport11) protein_coding TRNA METHYLTRANSFERASE 7C (TRM7C) (ATTRM7C);TRNA METHYLTRANSFERASE 7C (TRM7C)	FALSE			brown	Leaf
Gm02_45524181	Medians_Blink	pr_tip_depth	9.71e-09	45524180	45524182	Glyma.02G250500	Gm02	45627202	45627654	-	103020		AT3G55570			cytoplasmic tRNA 2-thiolation protein;(source:Araport11) protein_coding	FALSE	0		honeydew1	Unassigned
Gm06_35340939	Medians_Blink	pr_tip_depth	6.32e-09	35340938	35340940	Glyma.06G230500	Gm06	35376414	35378150	-	35474						FALSE	1	Vascular bundle/Xylem pole pericycle	steelblue	Unassigned
Gm06_35340939	Medians_Blink	pr_tip_depth	6.32e-09	35340938	35340940	Glyma.06G230600	Gm06	35387948	35400407	-	47008	GO:0016020;GO:0008378;GO:0006486	AT1G53290		Galactosyltransferase_family_protein	Galactosyltransferase family protein;(source:Araport11) protein_coding (GALT9) (GALT9)	FALSE	10	Cortex, Pericycle, Vascular bundle/Xylem pole pericycle, Stele, Endodermis, Epidermis, Xylem, Vascular bundle, Metaphloem, Cluster13	blue	Leaf
Gm06_35340939	Medians_Blink	pr_tip_depth	6.32e-09	35340938	35340940	Glyma.06G230700	Gm06	35394926	35398127	+	53986	GO:0003677;GO:0046983	AT4G15020		hAT_transposon_superfamily	hAT transposon superfamily;(source:Araport11) protein_coding	FALSE			blue	Leaf
Gm06_35340939	Medians_Blink	pr_tip_depth	6.32e-09	35340938	35340940	Glyma.06G230800	Gm06	35425733	35429817	+	84793	GO:0006468;GO:0005524;GO:0004672	AT1G16670		Protein_kinase_superfamily_protein	Encodes a cold-activated plasma membrane protein cold-responsive protein kinase that phosphorylates 14-3-3 proteins. The phosphorylated 14-3-3 proteins shuttle from the cytosol to the nucleus, where they interact with and destabilize the key cold-responsive C-repeat-binding factor (CBF) proteins, modulate CBF stability and the response to cold stress. protein_coding COLD-RESPONSIVE PROTEIN KINASE…	FALSE	10	Cortex, Pericycle, Vascular bundle/Xylem pole pericycle, Stele, Endodermis, Epidermis, Xylem, Vascular bundle, Metaphloem, Cluster13	turquoise	Root
Gm06_35340939	Medians_Blink	pr_tip_depth	6.32e-09	35340938	35340940	Glyma.06G230400	Gm06	35249094	35253245	-	-87694	GO:0045454;GO:0005515	AT1G53300	TTL1	tetratricopetide-repeat_thioredoxin-like_1	Encodes one of the 36 carboxylate clamp (CC)-tetratricopeptide repeat (TPR) proteins (Prasad 2010, Pubmed ID: 20856808) with potential to interact with Hsp90/Hsp70 as co-chaperones. The TTL family is required for osmotic stress tolerance and male sporogenesis. The mRNA is cell-to-cell mobile. protein_coding TETRATRICOPEPTIDE-REPEAT THIOREDOXIN-LIKE 1 (TTL1) TETRATRICOPEPTIDE-REPEAT THIOREDOXIN-LI…	FALSE	10	Cortex, Pericycle, Vascular bundle/Xylem pole pericycle, Stele, Endodermis, Epidermis, Xylem, Vascular bundle, Metaphloem, Cluster13	pink	Leaf
Gm06_35340939	Medians_Blink	pr_tip_depth	6.32e-09	35340938	35340940	Glyma.06G230300	Gm06	35231197	35236642	+	-104297		AT1G16890	UBC13B;UBC36	ubiquitin-conjugating_enzyme_36	UBC36/UBC13B encodes a protein that may play a role in DNA damage responses and error-free post-replicative DNA repair. It can bind to the MMZ/UEV1 proteins in vitro. protein_coding UBIQUITIN-CONJUGATING ENZYME 36 (UBC36) (ATUBC36);UBIQUITIN-CONJUGATING ENZYME 36 (UBC36)	TRUE	10	Cortex, Pericycle, Vascular bundle/Xylem pole pericycle, Stele, Endodermis, Epidermis, Xylem, Vascular bundle, Metaphloem, Cluster13	turquoise	Root
Gm06_35340939	Medians_Blink	pr_tip_depth	6.32e-09	35340938	35340940	Glyma.06G231000	Gm06	35453810	35458929	+	112870	GO:0003676	AT3G15010		RNA-binding_(RRM/RBD/RNP_motifs)_family_protein	RNA-binding (RRM/RBD/RNP motifs) family protein;(source:Araport11) protein_coding	FALSE	10	Cortex, Pericycle, Vascular bundle/Xylem pole pericycle, Stele, Endodermis, Epidermis, Xylem, Vascular bundle, Metaphloem, Cluster13	turquoise	Root
Gm06_35340939	Medians_Blink	pr_tip_depth	6.32e-09	35340938	35340940	Glyma.06G231100	Gm06	35459593	35459778	+	118653						TRUE			turquoise	Root
Gm06_35340939	Medians_Blink	pr_tip_depth	6.32e-09	35340938	35340940	Glyma.06G231200	Gm06	35475420	35480946	+	134480		AT2G31130			hypothetical protein;(source:Araport11) protein_coding	TRUE	7	Cortex, Pericycle, Vascular bundle/Xylem pole pericycle, Stele, Endodermis, Epidermis, Xylem	turquoise	Root
Gm06_35340939	Medians_Blink	pr_tip_depth	6.32e-09	35340938	35340940	Glyma.06G231300	Gm06	35479648	35484637	-	138708		AT1G73140	TBL31	Plant_protein_of_unknown_function_(DUF828)	Encodes a member of the TBL (TRICHOME BIREFRINGENCE-LIKE) gene family containing a plant-specific DUF231 (domain of unknown function) domain. TBL gene family has 46 members, two of which (TBR/AT5G06700 and TBL3/AT5G01360) have been shown to be involved in the synthesis and deposition of secondary wall cellulose, presumably by influencing the esterification state of pectic polymers. A nomenclature…	TRUE	5	Cortex, Pericycle, Vascular bundle/Xylem pole pericycle, Endodermis, Vascular bundle	turquoise	Root
Gm06_35340939	Medians_Blink	pr_tip_depth	6.32e-09	35340938	35340940	Glyma.06G231400	Gm06	35518118	35518963	-	177178						FALSE	0
Gm06_35340939	Medians_Blink	pr_tip_depth	6.32e-09	35340938	35340940	Glyma.06G230100	Gm06	35109507	35122779	-	-218160						FALSE	9	Cortex, Pericycle, Vascular bundle/Xylem pole pericycle, Stele, Endodermis, Epidermis, Xylem, Vascular bundle, Cluster13	grey	Leaf
Gm06_35340939	Medians_Blink	pr_tip_depth	6.32e-09	35340938	35340940	Glyma.06G230200	Gm06	35112347	35114116	+	-226823	GO:0006355;GO:0005739;GO:0003690	AT1G78930		Mitochondrial_transcription_termination_factor_family_protein	Mitochondrial transcription termination factor family protein;(source:Araport11) protein_coding (MTERF16) (MTERF16)	FALSE			darkolivegreen	Unassigned
Gm06_35340939	Medians_Blink	pr_tip_depth	6.32e-09	35340938	35340940	Glyma.06G231500	Gm06	35625149	35629768	+	284209	GO:0055114;GO:0016491;GO:0016616;GO:0019752	AT1G53240	mMDH1	Lactate/malate_dehydrogenase_family_protein	mMDH1 encodes a mitochrondrial malate dehydrogenase. It is expressed at higher levels than the other mitochrondrial isoform mMDH2 (At3G15020) according to transcript and proteomic analyses. protein_coding MITOCHONDRIAL MALATE DEHYDROGENASE 1 (mMDH1) MITOCHONDRIAL MALATE DEHYDROGENASE 1 (mMDH1)	FALSE	10	Cortex, Pericycle, Vascular bundle/Xylem pole pericycle, Stele, Endodermis, Epidermis, Xylem, Vascular bundle, Metaphloem, Cluster13	turquoise	Root
Gm07_35512631	Medians_Blink	pr_tip_depth	5.31e-09	35512630	35512632	Glyma.07G184000	Gm07	35507607	35510798	-	-1833	GO:0006468;GO:0005524;GO:0004672;GO:0030246	AT5G10530		Concanavalin_A-like_lectin_protein_kinase_family_protein	Concanavalin A-like lectin protein kinase family protein;(source:Araport11) protein_coding L-TYPE LECTIN RECEPTOR KINASE IX.1 (LECRK-IX.1) L-TYPE LECTIN RECEPTOR KINASE IX.1 (LECRK-IX.1)	TRUE	10	Cortex, Pericycle, Vascular bundle/Xylem pole pericycle, Stele, Endodermis, Epidermis, Xylem, Vascular bundle, Metaphloem, Cluster13	turquoise	Root
Gm07_35512631	Medians_Blink	pr_tip_depth	5.31e-09	35512630	35512632	Glyma.07G183900	Gm07	35502263	35504854	+	-7777	GO:0016020;GO:0006468;GO:0005524;GO:0004672	AT5G10530		Concanavalin_A-like_lectin_protein_kinase_family_protein	Concanavalin A-like lectin protein kinase family protein;(source:Araport11) protein_coding L-TYPE LECTIN RECEPTOR KINASE IX.1 (LECRK-IX.1) L-TYPE LECTIN RECEPTOR KINASE IX.1 (LECRK-IX.1)	FALSE	1	Epidermis	yellow	Root
Gm07_35512631	Medians_Blink	pr_tip_depth	5.31e-09	35512630	35512632	Glyma.07G183700	Gm07	35493005	35495320	-	-17311		AT1G18265		Protein_of_unknown_function;_DUF593	zein-binding protein (Protein of unknown function, DUF593);(source:Araport11) protein_coding	FALSE	9	Cortex, Pericycle, Vascular bundle/Xylem pole pericycle, Stele, Endodermis, Epidermis, Xylem, Vascular bundle, Metaphloem	yellow	Root
Gm07_35512631	Medians_Blink	pr_tip_depth	5.31e-09	35512630	35512632	Glyma.07G184100	Gm07	35532964	35538702	+	20332		AT5G09580			heat shock protein;(source:Araport11) protein_coding	FALSE	9	Cortex, Pericycle, Vascular bundle/Xylem pole pericycle, Stele, Endodermis, Epidermis, Xylem, Vascular bundle, Cluster13	blue	Leaf
Gm07_35512631	Medians_Blink	pr_tip_depth	5.31e-09	35512630	35512632	Glyma.07G183600	Gm07	35484102	35490752	-	-21879	GO:0055114;GO:0016491;GO:0008152	AT2G14170	ALDH6B2	aldehyde_dehydrogenase__6B2	Arabidopsis thaliana methylmalonate-semialdehyde dehydrogenase protein_coding ALDEHYDE DEHYDROGENASE 6B2 (ALDH6B2) (MMSD);ALDEHYDE DEHYDROGENASE 6B2 (ALDH6B2)	TRUE	10	Cortex, Pericycle, Vascular bundle/Xylem pole pericycle, Stele, Endodermis, Epidermis, Xylem, Vascular bundle, Metaphloem, Cluster13	turquoise	Root
Gm07_35512631	Medians_Blink	pr_tip_depth	5.31e-09	35512630	35512632	Glyma.07G184200	Gm07	35536867	35542957	-	24235	GO:0055085	AT5G64410	ATOPT4;OPT4	oligopeptide_transporter_4	oligopeptide transporter protein_coding OLIGOPEPTIDE TRANSPORTER 4 (OPT4) ARABIDOPSIS THALIANA OLIGOPEPTIDE TRANSPORTER 4 (ATOPT4);OLIGOPEPTIDE TRANSPORTER 4 (OPT4)	FALSE	2	Cortex, Vascular bundle	turquoise	Root
Gm07_35512631	Medians_Blink	pr_tip_depth	5.31e-09	35512630	35512632	Glyma.07G184300	Gm07	35545362	35548927	+	32730		AT5G09590	HSC70-5;MTHSC70-2	mitochondrial_HSO70_2	heat shock protein 70 (Hsc70-5); nuclear protein_coding MITOCHONDRIAL HSO70 2 (MTHSC70-2) MITOCHONDRIAL HSO70 2 (MTHSC70-2);HEAT SHOCK COGNATE (HSC70-5)	FALSE	9	Cortex, Pericycle, Vascular bundle/Xylem pole pericycle, Stele, Endodermis, Epidermis, Xylem, Vascular bundle, Metaphloem	blue	Leaf
Gm07_35512631	Medians_Blink	pr_tip_depth	5.31e-09	35512630	35512632	Glyma.07G183400	Gm07	35472709	35474493	+	-38138	GO:0016758;GO:0008152	AT5G17050	UGT78D2	UDP-glucosyl_transferase_78D2	The At5g17050 encodes a anthocyanidin 3-O-glucosyltransferase which specifically glucosylates the 3-position of the flavonoid C-ring. Anthocyanidins such as cyanidin and pelargonidin as well as flavonols such as kaempferol and quercetin are accepted substrates. protein_coding UDP-GLUCOSYL TRANSFERASE 78D2 (UGT78D2) UDP-GLUCOSYL TRANSFERASE 78D2 (UGT78D2)	FALSE	0		brown4	Unassigned
Gm07_35512631	Medians_Blink	pr_tip_depth	5.31e-09	35512630	35512632	Glyma.07G183300	Gm07	35469010	35471138	+	-41493	GO:0016758;GO:0008152	AT5G17050	UGT78D2	UDP-glucosyl_transferase_78D2	The At5g17050 encodes a anthocyanidin 3-O-glucosyltransferase which specifically glucosylates the 3-position of the flavonoid C-ring. Anthocyanidins such as cyanidin and pelargonidin as well as flavonols such as kaempferol and quercetin are accepted substrates. protein_coding UDP-GLUCOSYL TRANSFERASE 78D2 (UGT78D2) UDP-GLUCOSYL TRANSFERASE 78D2 (UGT78D2)	FALSE	1	Pericycle	mediumpurple3	Leaf
Gm07_35512631	Medians_Blink	pr_tip_depth	5.31e-09	35512630	35512632	Glyma.07G184400	Gm07	35559015	35560640	-	46383	GO:0005515	AT5G64430		Octicosapeptide/Phox/Bem1p_family_protein	Octicosapeptide/Phox/Bem1p family protein;(source:Araport11) protein_coding	FALSE	10	Cortex, Pericycle, Vascular bundle/Xylem pole pericycle, Stele, Endodermis, Epidermis, Xylem, Vascular bundle, Metaphloem, Cluster13	turquoise	Root
Gm07_35512631	Medians_Blink	pr_tip_depth	5.31e-09	35512630	35512632	Glyma.07G184500	Gm07	35564439	35569168	-	51807		AT5G64460		Phosphoglycerate_mutase_family_protein	Phosphoglycerate mutase family protein;(source:Araport11) protein_coding	FALSE	10	Cortex, Pericycle, Vascular bundle/Xylem pole pericycle, Stele, Endodermis, Epidermis, Xylem, Vascular bundle, Metaphloem, Cluster13	blue	Leaf
Gm07_35512631	Medians_Blink	pr_tip_depth	5.31e-09	35512630	35512632	Glyma.07G183200	Gm07	35456247	35457934	+	-54697	GO:0016758;GO:0008152	AT5G17050	UGT78D2	UDP-glucosyl_transferase_78D2	The At5g17050 encodes a anthocyanidin 3-O-glucosyltransferase which specifically glucosylates the 3-position of the flavonoid C-ring. Anthocyanidins such as cyanidin and pelargonidin as well as flavonols such as kaempferol and quercetin are accepted substrates. protein_coding UDP-GLUCOSYL TRANSFERASE 78D2 (UGT78D2) UDP-GLUCOSYL TRANSFERASE 78D2 (UGT78D2)	FALSE	4	Cortex, Vascular bundle/Xylem pole pericycle, Stele, Endodermis	turquoise	Root
Gm07_35512631	Medians_Blink	pr_tip_depth	5.31e-09	35512630	35512632	Glyma.07G184600	Gm07	35569994	35573707	+	57362		AT5G64470	TBL12	Plant_protein_of_unknown_function_(DUF828)	Encodes a member of the TBL (TRICHOME BIREFRINGENCE-LIKE) gene family containing a plant-specific DUF231 (domain of unknown function) domain. TBL gene family has 46 members, two of which (TBR/AT5G06700 and TBL3/AT5G01360) have been shown to be involved in the synthesis and deposition of secondary wall cellulose, presumably by influencing the esterification state of pectic polymers. A nomenclature…	FALSE	10	Cortex, Pericycle, Vascular bundle/Xylem pole pericycle, Stele, Endodermis, Epidermis, Xylem, Vascular bundle, Metaphloem, Cluster13	brown	Leaf
Gm07_35512631	Medians_Blink	pr_tip_depth	5.31e-09	35512630	35512632	Glyma.07G184700	Gm07	35576357	35578840	-	63725	GO:0055114;GO:0050661;GO:0033014;GO:0008883	AT1G58290	HEMA1	Glutamyl-tRNA_reductase_family_protein	Encodes a protein with glutamyl-tRNA reductase (GluTR) activity, catalyzing the NADPH-dependent reduction of Glu-tRNA(Glu) to glutamate 1-semialdehyde (GSA) with the release of free tRNA(Glu). It is involved in the early steps of chlorophyll biosynthesis. protein_coding (HEMA1) GLUTAMYL-TRNA REDUCTASE (GLUTR);ARABIDOPSIS THALIANA HEMA 1 (AtHEMA1); (HEMA1)	TRUE	10	Cortex, Pericycle, Vascular bundle/Xylem pole pericycle, Stele, Endodermis, Epidermis, Xylem, Vascular bundle, Metaphloem, Cluster13	yellow	Root
Gm07_35512631	Medians_Blink	pr_tip_depth	5.31e-09	35512630	35512632	Glyma.07G183100	Gm07	35445041	35447901	-	-64730		AT2G23970		Class_I_glutamine_amidotransferase-like_superfamily_protein	Class I glutamine amidotransferase-like superfamily protein;(source:Araport11) protein_coding	FALSE	9	Cortex, Pericycle, Vascular bundle/Xylem pole pericycle, Stele, Endodermis, Epidermis, Xylem, Vascular bundle, Metaphloem	yellow	Root
Gm07_35512631	Medians_Blink	pr_tip_depth	5.31e-09	35512630	35512632	Glyma.07G183050	Gm07	35439794	35440466	-	-72165						FALSE	0
Gm07_35512631	Medians_Blink	pr_tip_depth	5.31e-09	35512630	35512632	Glyma.07G184800	Gm07	35587017	35598387	+	74385	GO:0006813;GO:0055085;GO:0016021;GO:0015299;GO:0006812	AT4G04850	ATKEA3;KEA3	K+_efflux_antiporter_3	Encodes a potassium efflux antiporter; has three splice forms KEA3.1, KEA3.2, and KEA3.3, KEA3.2 is the most abundant splice form in all plant organs (silique, flower, leaf and root). KEA3.1 and KEA3.3 are minor variants that can be found in flowers and in leaves. KEA3 is localized to the thylakoid membrane and enriched in the stromal lamellae. It allows proton efflux from the thylakoid lumen by …	FALSE	10	Cortex, Pericycle, Vascular bundle/Xylem pole pericycle, Stele, Endodermis, Epidermis, Xylem, Vascular bundle, Metaphloem, Cluster13	turquoise	Root
Gm07_35512631	Medians_Blink	pr_tip_depth	5.31e-09	35512630	35512632	Glyma.07G183000	Gm07	35429014	35432226	+	-80405		AT5G09570		Cox19-like_CHCH_family_protein	Twin CX9C domain protein. Induced by low phosphate or iron, drought and heat stress. Loss of both At12cys-1 and At12cys-2 lead to enhanced tolerance to drought and light stress and increased anti-oxidant capacity. protein_coding (AT12CYS-2) (AT12CYS-2)	FALSE	10	Cortex, Pericycle, Vascular bundle/Xylem pole pericycle, Stele, Endodermis, Epidermis, Xylem, Vascular bundle, Metaphloem, Cluster13	yellow	Root
Gm07_35512631	Medians_Blink	pr_tip_depth	5.31e-09	35512630	35512632	Glyma.07G182900	Gm07	35418926	35427831	+	-84800	GO:0005525;GO:0003924	AT4G33650	ADL2;DRP3A	dynamin-related_protein_3A	Encodes a protein with high sequence similarity to the dynamin superfamily. Among those members ADL2 was most closely related to Dnm1p of yeast and likely a member of the Vps1p subfamily. Widely expressed in various tissues with highest expression in flower tissues. Localizes to the chloroplast, mitochondrion and peroxisome. Involved in peroxisome and mitochondria fission in combination with DRP3…	FALSE	10	Cortex, Pericycle, Vascular bundle/Xylem pole pericycle, Stele, Endodermis, Epidermis, Xylem, Vascular bundle, Metaphloem, Cluster13	turquoise	Root
Gm07_35512631	Medians_Blink	pr_tip_depth	5.31e-09	35512630	35512632	Glyma.07G184900	Gm07	35599788	35607788	+	87156	GO:0016020;GO:0006810;GO:0005215	AT5G64500		Major_facilitator_superfamily_protein	Major facilitator superfamily protein protein_coding	TRUE	10	Cortex, Pericycle, Vascular bundle/Xylem pole pericycle, Stele, Endodermis, Epidermis, Xylem, Vascular bundle, Metaphloem, Cluster13	turquoise	Root
Gm07_44928572	Medians_Blink	pr_tip_depth	6.49e-10	44928571	44928573	Glyma.07G274200	Gm07	44916606	44919247	-	-9325	GO:0055085;GO:0016021	AT5G44370	PHT4;6	phosphate_transporter_4;6	Encodes an inorganic phosphate transporter (PHT4;6). protein_coding PHOSPHATE TRANSPORTER 4;6 (PHT4;6) PHOSPHATE TRANSPORTER 4;6 (PHT4;6)	FALSE	8	Cortex, Pericycle, Vascular bundle/Xylem pole pericycle, Stele, Endodermis, Epidermis, Xylem, Metaphloem	turquoise	Root
Gm07_44928572	Medians_Blink	pr_tip_depth	6.49e-10	44928571	44928573	Glyma.07G274150	Gm07	44915490	44915651	-	-12921						FALSE			darkseagreen3	Unassigned
Gm07_44928572	Medians_Blink	pr_tip_depth	6.49e-10	44928571	44928573	Glyma.07G274100	Gm07	44907304	44913713	-	-14859		AT5G08565		Transcription_initiation_Spt4-like_protein	Transcription initiation Spt4-like protein;(source:Araport11) protein_coding (SPT4-1) (SPT4-1)	TRUE	9	Cortex, Pericycle, Vascular bundle/Xylem pole pericycle, Stele, Endodermis, Epidermis, Xylem, Vascular bundle, Metaphloem	turquoise	Root
Gm07_44928572	Medians_Blink	pr_tip_depth	6.49e-10	44928571	44928573	Glyma.07G274000	Gm07	44902263	44904871	-	-23701		AT3G59900	ARGOS	auxin-regulated_gene_involved_in_organ_size	Encodes ARGOS (Auxin-Regulated Gene Involved in Organ Size). Inducible by auxin. Involved in lateral organ size control. Transgenic plants expressing sense or antisense ARGOS cDNA display enlarged or reduced aerial organs, respectively. The alteration in organ size is attributable mainly to changes in cell number and the duration of organ growth. protein_coding AUXIN-REGULATED GENE INVOLVED IN OR…	FALSE	10	Cortex, Pericycle, Vascular bundle/Xylem pole pericycle, Stele, Endodermis, Epidermis, Xylem, Vascular bundle, Metaphloem, Cluster13	turquoise	Root
Gm07_44928572	Medians_Blink	pr_tip_depth	6.49e-10	44928571	44928573	Glyma.07G273900	Gm07	44890795	44894698	+	-33874		AT3G59910		Ankyrin_repeat_family_protein	Ankyrin repeat family protein;(source:Araport11) protein_coding	FALSE	10	Cortex, Pericycle, Vascular bundle/Xylem pole pericycle, Stele, Endodermis, Epidermis, Xylem, Vascular bundle, Metaphloem, Cluster13	blue	Leaf
Gm07_44928572	Medians_Blink	pr_tip_depth	6.49e-10	44928571	44928573	Glyma.07G273800	Gm07	44877154	44885079	-	-43493		AT2G43900		Endonuclease/exonuclease/phosphatase_family_protein	Encodes a 5-inositol-phosphate phosphatase, that, in vitro, shows activity against IP(1,4,5). protein_coding INOSITOL-POLYPHOSPHATE 5-PHOSPHATASE 12 (5PTASE12) INOSITOL-POLYPHOSPHATE 5-PHOSPHATASE 12 (5PTASE12)	FALSE	9	Cortex, Pericycle, Vascular bundle/Xylem pole pericycle, Stele, Endodermis, Epidermis, Xylem, Vascular bundle, Cluster13	blue	Leaf
Gm07_44928572	Medians_Blink	pr_tip_depth	6.49e-10	44928571	44928573	Glyma.07G273700	Gm07	44869004	44875424	-	-53148		AT2G43945			hypothetical protein;(source:Araport11) protein_coding	FALSE	10	Cortex, Pericycle, Vascular bundle/Xylem pole pericycle, Stele, Endodermis, Epidermis, Xylem, Vascular bundle, Metaphloem, Cluster13	brown	Leaf
Gm07_44928572	Medians_Blink	pr_tip_depth	6.49e-10	44928571	44928573	Glyma.07G273600	Gm07	44860176	44863761	+	-64811	GO:0055114;GO:0016491	AT1G57770		FAD/NAD(P)-binding_oxidoreductase_family_protein	FAD/NAD(P)-binding oxidoreductase family protein;(source:Araport11) protein_coding	FALSE	10	Cortex, Pericycle, Vascular bundle/Xylem pole pericycle, Stele, Endodermis, Epidermis, Xylem, Vascular bundle, Metaphloem, Cluster13	brown	Leaf
Gm07_44928572	Medians_Blink	pr_tip_depth	6.49e-10	44928571	44928573	Glyma.07G273500	Gm07	44856772	44859348	-	-69224	GO:0005515;GO:0006414;GO:0003746	AT1G09640		Translation_elongation_factor_EF1B;_gamma_chain	Translation elongation factor EF1B, gamma chain;(source:Araport11) protein_coding	FALSE	10	Cortex, Pericycle, Vascular bundle/Xylem pole pericycle, Stele, Endodermis, Epidermis, Xylem, Vascular bundle, Metaphloem, Cluster13	blue	Leaf
Gm07_44928572	Medians_Blink	pr_tip_depth	6.49e-10	44928571	44928573	Glyma.07G273400	Gm07	44852952	44855863	-	-72709		AT1G57680			plasminogen activator inhibitor;(source:Araport11) protein_coding CANDIDATE G-PROTEIN COUPLED RECEPTOR 1 (CAND1) CANDIDATE G-PROTEIN COUPLED RECEPTOR 1 (CAND1)	FALSE	9	Cortex, Pericycle, Vascular bundle/Xylem pole pericycle, Stele, Endodermis, Epidermis, Xylem, Vascular bundle, Metaphloem	turquoise	Root
Gm07_44928572	Medians_Blink	pr_tip_depth	6.49e-10	44928571	44928573	Glyma.07G273300	Gm07	44842346	44853624	-	-74948	GO:0016021;GO:0006665;GO:0004348	AT5G49900		Beta-glucosidase;_GBA2_type_family_protein	Beta-glucosidase, GBA2 type family protein;(source:Araport11) protein_coding	FALSE	10	Cortex, Pericycle, Vascular bundle/Xylem pole pericycle, Stele, Endodermis, Epidermis, Xylem, Vascular bundle, Metaphloem, Cluster13	yellow	Root
Gm07_44928572	Medians_Blink	pr_tip_depth	6.49e-10	44928571	44928573	Glyma.07G273100	Gm07	44828106	44840528	-	-88044	GO:0005525;GO:0003924	AT1G59610	ADL3;CF1;DL3;DRP2B	dynamin-like_3	A high molecular weight GTPase whose GTP-binding domain shows a low homology to those of other plant dynamin-like proteins.Contains a pleckstrin homologous domain. DRP2B and DRP1A participate together in clathrin-coated vesicle formation during endocytosis. The mRNA is cell-to-cell mobile. protein_coding DYNAMIN-LIKE 3 (DL3) DYNAMIN-LIKE 3 (DL3);DYNAMIN-LIKE 3 (ADL3);DYNAMIN RELATED PROTEIN 2B (D…	FALSE	10	Cortex, Pericycle, Vascular bundle/Xylem pole pericycle, Stele, Endodermis, Epidermis, Xylem, Vascular bundle, Metaphloem, Cluster13	blue	Leaf
Gm07_44928572	Medians_Blink	pr_tip_depth	6.49e-10	44928571	44928573	Glyma.07G273000	Gm07	44823162	44827256	-	-101316		AT2G23390			acyl-CoA;(source:Araport11) protein_coding	FALSE	10	Cortex, Pericycle, Vascular bundle/Xylem pole pericycle, Stele, Endodermis, Epidermis, Xylem, Vascular bundle, Metaphloem, Cluster13	brown	Leaf
Gm07_44928572	Medians_Blink	pr_tip_depth	6.49e-10	44928571	44928573	Glyma.07G272800	Gm07	44814499	44821841	+	-106731	GO:0006355;GO:0005634;GO:0003677;GO:0009725	AT1G59750	ARF1	auxin_response_factor_1	Encodes a member of the auxin response factor family. ARFs bind to the cis element 5-TGTCTC-3 ARFs mediate changes in gene expression in response to auxin. ARFs form heterodimers with IAA/AUX genes. ARF1 enhances mutant phenotypes of ARF2 and may act with ARF2 to control aspects of maturation and senescence.ARF1:LUC and 3xHA:ARF1 proteins have a half-life of ~3-4 hours and their degradation is re…	FALSE	10	Cortex, Pericycle, Vascular bundle/Xylem pole pericycle, Stele, Endodermis, Epidermis, Xylem, Vascular bundle, Metaphloem, Cluster13	black	Hypocotyl
Gm07_44928572	Medians_Blink	pr_tip_depth	6.49e-10	44928571	44928573	Glyma.07G272700	Gm07	44802850	44811307	-	-117265	GO:0007094	AT5G49880		mitotic_checkpoint_family_protein	Encodes a spindle assembly checkpoint protein MAD1. The mRNA is cell-to-cell mobile. protein_coding MITOTIC ARREST DEFICIENT 1 (MAD1) MITOTIC ARREST DEFICIENT 1 (MAD1);NITRIC OXIDE-INDUCED EARLY COTYLEDON SENESCENCE 1 (NES1); (ATMAD1)	FALSE	10	Cortex, Pericycle, Vascular bundle/Xylem pole pericycle, Stele, Endodermis, Epidermis, Xylem, Vascular bundle, Metaphloem, Cluster13	blue	Leaf
Gm07_44928572	Medians_Blink	pr_tip_depth	6.49e-10	44928571	44928573	Glyma.07G272600	Gm07	44788854	44791041	-	-137531	GO:0016020;GO:0006810;GO:0005215	AT1G59740		Major_facilitator_superfamily_protein	Major facilitator superfamily protein;(source:Araport11) protein_coding NRT1/ PTR FAMILY 4.3 (NPF4.3) NRT1/ PTR FAMILY 4.3 (NPF4.3); (ATNPF4.3)	FALSE	7	Cortex, Pericycle, Vascular bundle/Xylem pole pericycle, Stele, Endodermis, Xylem, Vascular bundle	yellow	Root
Gm07_44928572	Medians_Blink	pr_tip_depth	6.49e-10	44928571	44928573	Glyma.07G272500	Gm07	44783513	44787057	-	-141515	GO:0006397;GO:0005737;GO:0005634;GO:0003723	AT2G02570		nucleic_acid_binding;RNA_binding	Similar to SPF30 splicing factor. Under circadian control. Mutants have defects in alternative splicing and show more intron retention compared to wt. protein_coding SPLICING FACTOR 30 (SPF30) SPLICING FACTOR 30 (SPF30)	TRUE	10	Cortex, Pericycle, Vascular bundle/Xylem pole pericycle, Stele, Endodermis, Epidermis, Xylem, Vascular bundle, Metaphloem, Cluster13	turquoise	Root
Gm07_44928572	Medians_Blink	pr_tip_depth	6.49e-10	44928571	44928573	Glyma.07G272400	Gm07	44769868	44782830	+	-145742		AT2G02560	ATCAND1;CAND1;ETA2;HVE;TIP120	cullin-associated_and_neddylation_dissociated	Arabidopsis thaliana homolog of human CAND1 (cullin-associated and neddylation-dissociated). Putative similarity to TBP-interacting protein TIP120. Ubiquitously expressed in plant tissues throughout development. T-DNA insertion mutant plants were completely sterile and resistant to sirtinol and auxin, but not to gibberellins or brassinolide. Displayed developmental phenotypes similar to those of …	FALSE	10	Cortex, Pericycle, Vascular bundle/Xylem pole pericycle, Stele, Endodermis, Epidermis, Xylem, Vascular bundle, Metaphloem, Cluster13	blue	Leaf
Gm07_44928572	Medians_Blink	pr_tip_depth	6.49e-10	44928571	44928573	Glyma.07G272200	Gm07	44760843	44765169	-	-163403		AT5G49820	EMB1879;RUS6	Protein_of_unknown_function;_DUF647	root UVB sensitive protein (Protein of unknown function, DUF647);(source:Araport11) protein_coding ROOT UV-B SENSITIVE 6 (RUS6) EMBRYO DEFECTIVE 1879 (emb1879);ROOT UV-B SENSITIVE 6 (RUS6)	TRUE	10	Cortex, Pericycle, Vascular bundle/Xylem pole pericycle, Stele, Endodermis, Epidermis, Xylem, Vascular bundle, Metaphloem, Cluster13	turquoise	Root
Gm07_44928572	Medians_Blink	pr_tip_depth	6.49e-10	44928571	44928573	Glyma.07G272050	Gm07	44755331	44757009	-	-171563		AT4G02550			Myb/SANT-like DNA-binding domain protein;(source:Araport11) protein_coding	FALSE	0
Gm09_17696953	Medians_Blink	pr_tip_depth	4.36e-12	17696952	17696954	Glyma.09G100700	Gm09	17700036	17703976	+	3082						FALSE
Gm09_17696953	Medians_Blink	pr_tip_depth	4.36e-12	17696952	17696954	Glyma.09G100800	Gm09	17707804	17712109	+	10850						FALSE	0		skyblue3	Unassigned
Gm09_17696953	Medians_Blink	pr_tip_depth	4.36e-12	17696952	17696954	Glyma.09G100600	Gm09	17678668	17684808	+	-12145						FALSE	0
Gm09_17696953	Medians_Blink	pr_tip_depth	4.36e-12	17696952	17696954	Glyma.09G100500	Gm09	17648794	17653137	+	-43816						FALSE	0
Gm09_17696953	Medians_Blink	pr_tip_depth	4.36e-12	17696952	17696954	Glyma.09G100100	Gm09	17578307	17581157	-	-115796		AT5G54850			hexon;(source:Araport11) protein_coding	FALSE	6	Cortex, Pericycle, Vascular bundle/Xylem pole pericycle, Stele, Endodermis, Epidermis	pink	Leaf
Gm09_17696953	Medians_Blink	pr_tip_depth	4.36e-12	17696952	17696954	Glyma.09G100000	Gm09	17544837	17546199	+	-150754						FALSE	2	Epidermis, Metaphloem	grey	Leaf
Gm09_17696953	Medians_Blink	pr_tip_depth	4.36e-12	17696952	17696954	Glyma.09G099900	Gm09	17523813	17544179	+	-152774	GO:0006468;GO:0004672	AT1G56130		Leucine-rich_repeat_transmembrane_protein_kinase	Leucine-rich repeat transmembrane protein kinase;(source:Araport11) protein_coding	TRUE	10	Cortex, Pericycle, Vascular bundle/Xylem pole pericycle, Stele, Endodermis, Epidermis, Xylem, Vascular bundle, Metaphloem, Cluster13	turquoise	Root
Gm09_17696953	Medians_Blink	pr_tip_depth	4.36e-12	17696952	17696954	Glyma.09G099500	Gm09	17483088	17489265	+	-207688	GO:0055085;GO:0016021;GO:0008324;GO:0006812	AT1G16310		Cation_efflux_family_protein	Cation efflux family protein which affects ABA-JA crosstalk and susceptibility to Mamestra brassicae herbivory. protein_coding METAL-TOLERANCE PROTEIN 10 (MTP10) METAL-TOLERANCE PROTEIN 10 (MTP10)	TRUE	10	Cortex, Pericycle, Vascular bundle/Xylem pole pericycle, Stele, Endodermis, Epidermis, Xylem, Vascular bundle, Metaphloem, Cluster13	turquoise	Root
Gm09_17696953	Medians_Blink	pr_tip_depth	4.36e-12	17696952	17696954	Glyma.09G099600	Gm09	17484190	17484822	+	-212131						TRUE	9	Cortex, Pericycle, Vascular bundle/Xylem pole pericycle, Stele, Endodermis, Epidermis, Xylem, Vascular bundle, Metaphloem	turquoise	Root
Gm09_17696953	Medians_Blink	pr_tip_depth	4.36e-12	17696952	17696954	Glyma.09G099400	Gm09	17419609	17423910	+	-273043	GO:0003677;GO:0046983	AT3G42170		BED_zinc_finger_;hAT_family_dimerisation_domain	transposase-like gene with conserved domains from the family of hAT transposases that includes hobo from Drosophila melanogaster, Activator (Ac) from maize, and Tam3 from snapdragon but lacks several amino acids known to be essential for Ac transposition5. The DAYSLEEPER gene lacks 8 bp duplications and TIRs (a common feature of transcriptionally silent hAT transposases), however, DAYSLEEPER expr…	FALSE	10	Cortex, Pericycle, Vascular bundle/Xylem pole pericycle, Stele, Endodermis, Epidermis, Xylem, Vascular bundle, Metaphloem, Cluster13	blue	Leaf
Gm09_17696953	Medians_Blink	pr_tip_depth	4.36e-12	17696952	17696954	Glyma.09G100900	Gm09	17981648	17984377	+	284694						FALSE	0
Gm18_51895181	Medians_Blink	pr_tip_depth	8.73e-10	51895180	51895182	Glyma.18G226850	Gm18	51880629	51904149	+	0	GO:0005515;GO:0043531	AT4G26090	RPS2	NB-ARC_domain-containing_disease_resistance_protein	Encodes a plasma membrane protein with leucine-rich repeat, leucine zipper, and P loop domains that confers resistance to Pseudomonas syringae infection by interacting with the avirulence gene avrRpt2. RPS2 protein interacts directly with plasma membrane associated protein RIN4 and this interaction is disrupted by avrRpt2. The mRNA is cell-to-cell mobile. protein_coding RESISTANT TO P. SYRINGAE 2…	FALSE	10	Cortex, Pericycle, Vascular bundle/Xylem pole pericycle, Stele, Endodermis, Epidermis, Xylem, Vascular bundle, Metaphloem, Cluster13	brown	Leaf
Gm18_51895181	Medians_Blink	pr_tip_depth	8.73e-10	51895180	51895182	Glyma.18G227000	Gm18	51905562	51906586	+	10380						TRUE			turquoise	Root
Gm18_51895181	Medians_Blink	pr_tip_depth	8.73e-10	51895180	51895182	Glyma.18G227100	Gm18	51909689	51914173	+	14507		AT4G00755		F-box_family_protein	F-box family protein;(source:Araport11) protein_coding	TRUE	10	Cortex, Pericycle, Vascular bundle/Xylem pole pericycle, Stele, Endodermis, Epidermis, Xylem, Vascular bundle, Metaphloem, Cluster13	turquoise	Root
Gm18_51895181	Medians_Blink	pr_tip_depth	8.73e-10	51895180	51895182	Glyma.18G227200	Gm18	51920829	51926122	-	25647	GO:0016559;GO:0005779	AT1G01820	PEX11C	peroxin_11c	member of the peroxin11 (PEX11) gene family, integral to peroxisome membrane, controls peroxisome proliferation. protein_coding PEROXIN 11C (PEX11C) PEROXIN 11C (PEX11C)	FALSE	10	Cortex, Pericycle, Vascular bundle/Xylem pole pericycle, Stele, Endodermis, Epidermis, Xylem, Vascular bundle, Metaphloem, Cluster13	blue	Leaf
Gm18_51895181	Medians_Blink	pr_tip_depth	8.73e-10	51895180	51895182	Glyma.18G227300	Gm18	51924754	51924915	-	29572						FALSE			grey	Leaf
Gm18_51895181	Medians_Blink	pr_tip_depth	8.73e-10	51895180	51895182	Glyma.18G226700	Gm18	51861358	51862564	+	-32617						FALSE	3	Cortex, Pericycle, Vascular bundle	turquoise	Root
Gm18_51895181	Medians_Blink	pr_tip_depth	8.73e-10	51895180	51895182	Glyma.18G227400	Gm18	51932732	51936508	-	37550	GO:0005515	AT2G45720		ARM_repeat_superfamily_protein	ARM repeat superfamily protein;(source:Araport11) protein_coding	TRUE	9	Cortex, Pericycle, Vascular bundle/Xylem pole pericycle, Stele, Endodermis, Epidermis, Xylem, Vascular bundle, Cluster13	turquoise	Root
Gm18_51895181	Medians_Blink	pr_tip_depth	8.73e-10	51895180	51895182	Glyma.18G226600	Gm18	51850666	51853152	-	-42029		AT5G01150		Protein_of_unknown_function_(DUF674)	hypothetical protein (DUF674);(source:Araport11) protein_coding	FALSE	8	Cortex, Pericycle, Vascular bundle/Xylem pole pericycle, Stele, Endodermis, Epidermis, Xylem, Cluster13	brown	Leaf
Gm18_51895181	Medians_Blink	pr_tip_depth	8.73e-10	51895180	51895182	Glyma.18G227500	Gm18	51945318	51951114	-	50136	GO:0006412;GO:0005840;GO:0003735;GO:0015934	AT4G28360		Ribosomal_protein_L22p/L17e_family_protein	Ribosomal protein L22p/L17e family protein;(source:Araport11) protein_coding	FALSE	10	Cortex, Pericycle, Vascular bundle/Xylem pole pericycle, Stele, Endodermis, Epidermis, Xylem, Vascular bundle, Metaphloem, Cluster13	blue	Leaf
Gm18_51895181	Medians_Blink	pr_tip_depth	8.73e-10	51895180	51895182	Glyma.18G226551	Gm18	51843009	51843128	+	-52053						FALSE
Gm18_51895181	Medians_Blink	pr_tip_depth	8.73e-10	51895180	51895182	Glyma.18G226500	Gm18	51789556	51832726	+	-62455	GO:0005515;GO:0043531	AT1G61190		LRR_and_NB-ARC_domains-containing_disease_resistance_protein	Putative CC-NB-LRR resistance gene. Its ortholog in ecotype Wei-0 RPP39 (R_190-Wei-0, accession number JQ045573, PMID:22359513) has been shown experimentally to recognize the effector ATR39-1 produced by Hyaloperonospora arabidopsidis (Hpa). The mRNA is cell-to-cell mobile. protein_coding RESISTANCE TO PERONOSPORA PARASITICA 39 (RPP39)	TRUE	10	Cortex, Pericycle, Vascular bundle/Xylem pole pericycle, Stele, Endodermis, Epidermis, Xylem, Vascular bundle, Metaphloem, Cluster13	turquoise	Root
Gm18_51895181	Medians_Blink	pr_tip_depth	8.73e-10	51895180	51895182	Glyma.18G227600	Gm18	51964422	51964553	+	69240						FALSE
Gm18_51895181	Medians_Blink	pr_tip_depth	8.73e-10	51895180	51895182	Glyma.18G227700	Gm18	51968579	51970919	+	73397	GO:0008270;GO:0005515	AT3G03550		RING/U-box_superfamily_protein	RING/U-box superfamily protein;(source:Araport11) protein_coding ARABIDOPSIS T??XICOS EN LEVADURA 51 (ATL51) ARABIDOPSIS T??XICOS EN LEVADURA 51 (ATL51)	FALSE	10	Cortex, Pericycle, Vascular bundle/Xylem pole pericycle, Stele, Endodermis, Epidermis, Xylem, Vascular bundle, Metaphloem, Cluster13	blue	Leaf
Gm18_51895181	Medians_Blink	pr_tip_depth	8.73e-10	51895180	51895182	Glyma.18G227800	Gm18	51980569	51981640	+	85387		AT1G01840			AP2-like ethylene-responsive transcription factor SNZ;(source:Araport11) protein_coding	FALSE	8	Cortex, Pericycle, Vascular bundle/Xylem pole pericycle, Stele, Endodermis, Epidermis, Vascular bundle, Metaphloem	blue	Leaf
Gm18_51895181	Medians_Blink	pr_tip_depth	8.73e-10	51895180	51895182	Glyma.18G227900	Gm18	51981747	51987348	-	86565		AT1G01860	PFC1	Ribosomal_RNA_adenine_dimethylase_family_protein	dimethyladenosine transferase protein_coding PALEFACE 1 (PFC1) PALEFACE 1 (PFC1)	FALSE	9	Cortex, Pericycle, Vascular bundle/Xylem pole pericycle, Stele, Endodermis, Epidermis, Xylem, Vascular bundle, Metaphloem	brown	Leaf
Gm18_51895181	Medians_Blink	pr_tip_depth	8.73e-10	51895180	51895182	Glyma.18G228000	Gm18	51988029	51992788	-	92847	GO:0006281;GO:0004518	AT1G01880		5\'-3\'_exonuclease_family_protein	Encodes one of two GEN1 homologs in Arabidopsis. It is a member of the class IV Rad2/XPG family of nucleases that processes Holliday junctions in a manner analogous to the HJ resolvases of phages, archaea, and bacteria. protein_coding ORTHOLOG OF HSGEN1 (GEN1) ORTHOLOG OF HSGEN1 (GEN1); (ATGEN1)	FALSE	10	Cortex, Pericycle, Vascular bundle/Xylem pole pericycle, Stele, Endodermis, Epidermis, Xylem, Vascular bundle, Metaphloem, Cluster13	blue	Leaf
Gm18_51895181	Medians_Blink	pr_tip_depth	8.73e-10	51895180	51895182	Glyma.18G226400	Gm18	51783147	51786175	-	-109006		AT5G01150		Protein_of_unknown_function_(DUF674)	hypothetical protein (DUF674);(source:Araport11) protein_coding	TRUE	10	Cortex, Pericycle, Vascular bundle/Xylem pole pericycle, Stele, Endodermis, Epidermis, Xylem, Vascular bundle, Metaphloem, Cluster13	turquoise	Root
Gm18_51895181	Medians_Blink	pr_tip_depth	8.73e-10	51895180	51895182	Glyma.18G228100	Gm18	52005391	52009127	+	110209	GO:0016021;GO:0016020	AT4G23010	ATUTR2;UTR2	UDP-galactose_transporter_2	UDP-galactose transporter 2;(source:Araport11) protein_coding UDP-GALACTOSE TRANSPORTER 2 (UTR2) UDP-GALACTOSE TRANSPORTER 2 (UTR2)	FALSE	7	Cortex, Pericycle, Vascular bundle/Xylem pole pericycle, Stele, Epidermis, Vascular bundle, Metaphloem	brown	Leaf
Gm18_51895181	Medians_Blink	pr_tip_depth	8.73e-10	51895180	51895182	Glyma.18G226300	Gm18	51765122	51782390	+	-112791		AT1G62630		Disease_resistance_protein_(CC-NBS-LRR_class)_family	Disease resistance protein (CC-NBS-LRR class) family;(source:Araport11) protein_coding	FALSE	4	Cortex, Pericycle, Epidermis, Cluster13	turquoise	Root
Gm18_51895181	Medians_Blink	pr_tip_depth	8.73e-10	51895180	51895182	Glyma.18G228200	Gm18	52014080	52016780	+	118898		AT2G01770	ATVIT1;VIT1	vacuolar_iron_transporter_1	Encodes an iron transporter required for iron sequestration into vacuoles. Expressed in developing embryo and seed. Localized in the vacuolar membrane. protein_coding VACUOLAR IRON TRANSPORTER 1 (VIT1) (ATVIT1);VACUOLAR IRON TRANSPORTER 1 (VIT1)	FALSE	0		red	Meristem
Gm02_38012571	Medians_FarmCPU	Biomass_area	1.44e-09	38012570	38012572	Glyma.02G191500	Gm02	38009320	38026722	-	0	GO:0009058;GO:0005524;GO:0009396;GO:0004326	AT3G10160	ATDFC;DFC	DHFS-FPGS_homolog_C	Encodes a protein with tetrahydrofolylpolyglutamate synthase activity that is located in the mitochondrial matrix. One of the three folylpolyglutamate synthetase isoforms (FPGSs): FPGS1 (At5g05980, plastidic), FPGS2 (At3g10160, mitochondrial) and FPGS3 (At3g55630, cytosolic). protein_coding DHFS-FPGS HOMOLOG C (DFC) A. THALIANA DHFS-FPGS HOMOLOG C (ATDFC);FOLYLPOLYGLUTAMATE SYNTHETASE 2 (FPGS2);D…	FALSE	9	Cortex, Pericycle, Vascular bundle/Xylem pole pericycle, Stele, Endodermis, Epidermis, Xylem, Vascular bundle, Metaphloem	brown	Leaf
Gm02_38012571	Medians_FarmCPU	Biomass_area	1.44e-09	38012570	38012572	Glyma.02G191600	Gm02	38033318	38043565	-	20746	GO:0006415;GO:0003747;GO:0016149;GO:0005737	AT3G57190		peptide_chain_release_factor;_putative	Encodes a chloroplast stroma-localized ribosomal peptide chain release factor that is involved in the light- and stress-dependent regulation of stability of 3 processed petB transcripts to adjust cytochrome b(6) levels. It appears to bind to the 3-UTR of petB RNA, protecting it from 3-5 exonucleolytic attack. At-prfB3 arose from a gene duplication of At-prfB1. protein_coding PEPTIDE CHAIN RELEASE…	FALSE	6	Cortex, Pericycle, Vascular bundle/Xylem pole pericycle, Stele, Endodermis, Metaphloem	turquoise	Root
Gm02_38012571	Medians_FarmCPU	Biomass_area	1.44e-09	38012570	38012572	Glyma.02G191900	Gm02	38056392	38057990	-	43820		AT5G04010		F-box_family_protein	F-box family protein;(source:Araport11) protein_coding	FALSE	1	Cortex	grey	Leaf
Gm02_38012571	Medians_FarmCPU	Biomass_area	1.44e-09	38012570	38012572	Glyma.02G191100	Gm02	37938368	37943870	-	-68701	GO:0006281;GO:0004518	AT2G41460	ARP	apurinic_endonuclease-redox_protein	Apurinic endonuclease-redox protein. It functions as an apurinic/apyrimidinic class II endonuclease, and is involved in DNA repair. protein_coding APURINIC ENDONUCLEASE-REDOX PROTEIN (ARP) APURINIC ENDONUCLEASE-REDOX PROTEIN (ARP)	FALSE	8	Cortex, Pericycle, Vascular bundle/Xylem pole pericycle, Stele, Endodermis, Epidermis, Xylem, Vascular bundle	blue	Leaf
Gm02_38012571	Medians_FarmCPU	Biomass_area	1.44e-09	38012570	38012572	Glyma.02G191000	Gm02	37919497	37921151	+	-91420	GO:0006468;GO:0005524;GO:0004672;GO:0004674	AT5G26110		Protein_kinase_superfamily_protein	Protein kinase superfamily protein;(source:Araport11) protein_coding	FALSE	0
Gm02_38012571	Medians_FarmCPU	Biomass_area	1.44e-09	38012570	38012572	Glyma.02G191950	Gm02	38116654	38118418	-	104082		AT1G74670		Gibberellin-regulated_family_protein	Gibberellin-regulated family protein;(source:Araport11) protein_coding GA-STIMULATED ARABIDOPSIS 6 (GASA6) GA-STIMULATED ARABIDOPSIS 6 (GASA6)	FALSE	0		darkolivegreen	Unassigned
Gm02_38012571	Medians_FarmCPU	Biomass_area	1.44e-09	38012570	38012572	Glyma.02G192200	Gm02	38170676	38178753	+	158104	GO:0016787	AT3G10150	ATPAP16;PAP16	purple_acid_phosphatase_16	purple acid phosphatase 16;(source:Araport11) protein_coding PURPLE ACID PHOSPHATASE 16 (PAP16) PURPLE ACID PHOSPHATASE 16 (PAP16); (ATPAP16)	FALSE	10	Cortex, Pericycle, Vascular bundle/Xylem pole pericycle, Stele, Endodermis, Epidermis, Xylem, Vascular bundle, Metaphloem, Cluster13	turquoise	Root
Gm02_38012571	Medians_FarmCPU	Biomass_area	1.44e-09	38012570	38012572	Glyma.02G192300	Gm02	38195269	38201013	+	182697	GO:0008270;GO:0005515	AT5G22000	RHF2A	RING-H2_group_F2A	encodes a RING-type E3 ubiquitin ligase implicated in gametogenesis. Double mutant analyses with RHF1a suggests that RHF2a may be involved in targetting ICK4KRP6 for degradation following meiosis in order to allow the mitoses associated with megagametogenesis and microgametogenesis to occur. RHF2a is expressed in all four floral whorls and is present at ~8-fold higher levels than RHF1a in inflore…	TRUE	10	Cortex, Pericycle, Vascular bundle/Xylem pole pericycle, Stele, Endodermis, Epidermis, Xylem, Vascular bundle, Metaphloem, Cluster13	blue	Leaf
Gm02_38012571	Medians_FarmCPU	Biomass_area	1.44e-09	38012570	38012572	Glyma.02G190900	Gm02	37826935	37827758	+	-184813		AT5G40690			histone-lysine N-methyltransferase trithorax-like protein;(source:Araport11) protein_coding	TRUE	7	Cortex, Pericycle, Vascular bundle/Xylem pole pericycle, Stele, Endodermis, Epidermis, Cluster13	yellow	Root
Gm02_38012571	Medians_FarmCPU	Biomass_area	1.44e-09	38012570	38012572	Glyma.02G192400	Gm02	38201155	38202114	+	188583	GO:0009607;GO:0006952	AT1G70890	MLP43	MLP-like_protein_43	MLP-like protein 43;(source:Araport11) protein_coding MLP-LIKE PROTEIN 43 (MLP43) MAJOR LATEX PROTEIN LIKE 43 (MLP43);MLP-LIKE PROTEIN 43 (MLP43)	FALSE
Gm02_38012571	Medians_FarmCPU	Biomass_area	1.44e-09	38012570	38012572	Glyma.02G190700	Gm02	37771521	37776173	-	-236398	GO:0016021;GO:0008963	AT2G41490	GPT	UDP-glcnac-adolichol_phosphate_glcnac-1-p-transferase	UDP-GlcNAc:dolichol phosphate N-acetylglucosamine-1-phosphate transferase protein_coding UDP-GLCNAC-ADOLICHOL PHOSPHATE GLCNAC-1-P-TRANSFERASE (GPT) UDP-GLCNAC-ADOLICHOL PHOSPHATE GLCNAC-1-P-TRANSFERASE (GPT)	FALSE	10	Cortex, Pericycle, Vascular bundle/Xylem pole pericycle, Stele, Endodermis, Epidermis, Xylem, Vascular bundle, Metaphloem, Cluster13	blue	Leaf
Gm02_38012571	Medians_FarmCPU	Biomass_area	1.44e-09	38012570	38012572	Glyma.02G192500	Gm02	38251750	38257062	+	239178		AT5G26760			Encodes RPAP2 IYO Mate (RIMA), a homologue of yeast and human proteins linked to nuclear import of selective cargo. Knockdown of RIMA causes delayed onset of cell differentiation. protein_coding RPAP2 IYO MATE (RIMA) RPAP2 IYO MATE (RIMA)	FALSE	10	Cortex, Pericycle, Vascular bundle/Xylem pole pericycle, Stele, Endodermis, Epidermis, Xylem, Vascular bundle, Metaphloem, Cluster13	blue	Leaf
Gm02_38012571	Medians_FarmCPU	Biomass_area	1.44e-09	38012570	38012572	Glyma.02G192600	Gm02	38258697	38262904	-	246125		AT2G35880		TPX2_(targeting_protein_for_Xklp2)_protein_family	Microtubule-stabilizing protein. Expression is regulated by ethylene and it is a direct target of EIN3.During apical hook formation, it acts to modulate auxin maxima by regulating PIN traffiking. protein_coding WAVE-DAMPENED2-LIKE4 (WDL4) WAVE-DAMPENED2-LIKE4 (WDL4)	FALSE	10	Cortex, Pericycle, Vascular bundle/Xylem pole pericycle, Stele, Endodermis, Epidermis, Xylem, Vascular bundle, Metaphloem, Cluster13	blue	Leaf
Gm02_38012571	Medians_FarmCPU	Biomass_area	1.44e-09	38012570	38012572	Glyma.02G192700	Gm02	38290756	38296505	-	278184	GO:0006468;GO:0004672	AT5G04870	ATCPK1;CPK1	calcium_dependent_protein_kinase_1	A calcium-dependent protein kinase that can phosphorylate phenylalanine ammonia lyase (PAL), a key enzyme in pathogen defense.Phosphorylates, in vivo, the transcription factor ORE1, a master regulator of senescence. protein_coding CALCIUM DEPENDENT PROTEIN KINASE 1 (CPK1) (ATCPK1);CALCIUM DEPENDENT PROTEIN KINASE 1 (CPK1)	FALSE	10	Cortex, Pericycle, Vascular bundle/Xylem pole pericycle, Stele, Endodermis, Epidermis, Xylem, Vascular bundle, Metaphloem, Cluster13	grey	Leaf
Gm06_17855981	Medians_FarmCPU	Biomass_area	3.72e-11	17855980	17855982	Glyma.06G197200	Gm06	17854769	17855893	-	-88	GO:0005515	AT3G23880		F-box_and_associated_interaction_domains-containing_protein	F-box and associated interaction domains-containing protein;(source:Araport11) protein_coding	FALSE			turquoise	Root
Gm06_17855981	Medians_FarmCPU	Biomass_area	3.72e-11	17855980	17855982	Glyma.06G197300	Gm06	17858853	17861476	-	2871	GO:0045905;GO:0045901;GO:0043022;GO:0006452;GO:0003746;GO:0003723	AT1G13950	ATELF5A-1;EIF-5A;EIF5A;ELF5A-1	eukaryotic_elongation_factor_5A-1	Encodes eukaryotic translation initiation factor 5A (EIF-5A).In mammalian cells it functions as a shuttle protein that translocates mRNA from the nucleus to cytoplasmic ribosomes. Overexpression results in an increase in both primary and secondary xylem formation. In RNAi suppressed lines, xylem formation is reduced. protein_coding EUKARYOTIC ELONGATION FACTOR 5A-1 (ELF5A-1) (EIF-5A);EUKARYOTIC E…	TRUE	10	Cortex, Pericycle, Vascular bundle/Xylem pole pericycle, Stele, Endodermis, Epidermis, Xylem, Vascular bundle, Metaphloem, Cluster13	brown	Leaf
Gm06_17855981	Medians_FarmCPU	Biomass_area	3.72e-11	17855980	17855982	Glyma.06G197600	Gm06	17908489	17912658	+	52507	GO:0005515;GO:0006468;GO:0005524;GO:0004672	AT1G74360		Leucine-rich_repeat_protein_kinase_family_protein	NILR1 encodes a serine/threonine kinase involved in defense response to nematodes. protein_coding NEMATODE-INDUCED LRR-RLK 1 (NILR1) GERMINATION REPRESSION AND CELL EXPANSION RECEPTOR-LIKE KINASE (GRACE);NEMATODE-INDUCED LRR-RLK 1 (NILR1)	TRUE	10	Cortex, Pericycle, Vascular bundle/Xylem pole pericycle, Stele, Endodermis, Epidermis, Xylem, Vascular bundle, Metaphloem, Cluster13	turquoise	Root
Gm06_17855981	Medians_FarmCPU	Biomass_area	3.72e-11	17855980	17855982	Glyma.06G197700	Gm06	17914239	17916414	+	58257		AT5G61190		putative_endonuclease_or_glycosyl_hydrolase_with_C2H2-type_zinc_finger_domain	putative endonuclease or glycosyl hydrolase with C2H2-type zinc finger domain-containing protein;(source:Araport11) protein_coding	FALSE	2	Cortex, Vascular bundle	grey	Leaf
Gm06_17855981	Medians_FarmCPU	Biomass_area	3.72e-11	17855980	17855982	Glyma.06G197800	Gm06	17916751	17917534	-	60769		AT3G25400			dCTP pyrophosphatase-like protein;(source:Araport11) protein_coding	FALSE	0		turquoise	Root
Gm06_17855981	Medians_FarmCPU	Biomass_area	3.72e-11	17855980	17855982	Glyma.06G197900	Gm06	17932807	17933421	-	76825	GO:0022857;GO:0016021	AT3G28050		nodulin_MtN21_/EamA-like_transporter_family_protein	nodulin MtN21-like transporter family protein protein_coding USUALLY MULTIPLE ACIDS MOVE IN AND OUT TRANSPORTERS 41 (UMAMIT41) USUALLY MULTIPLE ACIDS MOVE IN AND OUT TRANSPORTERS 41 (UMAMIT41)	FALSE	0
Gm06_17855981	Medians_FarmCPU	Biomass_area	3.72e-11	17855980	17855982	Glyma.06G197933	Gm06	17935139	17935539	-	79157						FALSE
Gm06_17855981	Medians_FarmCPU	Biomass_area	3.72e-11	17855980	17855982	Glyma.06G197966	Gm06	17936890	17937105	-	80908						FALSE
Gm06_17855981	Medians_FarmCPU	Biomass_area	3.72e-11	17855980	17855982	Glyma.06G198000	Gm06	17939632	17945652	+	83650		AT1G13940		Plant_protein_of_unknown_function_(DUF863)	T-box transcription factor, putative (DUF863);(source:Araport11) protein_coding	FALSE	10	Cortex, Pericycle, Vascular bundle/Xylem pole pericycle, Stele, Endodermis, Epidermis, Xylem, Vascular bundle, Metaphloem, Cluster13	blue	Leaf
Gm06_17855981	Medians_FarmCPU	Biomass_area	3.72e-11	17855980	17855982	Glyma.06G198100	Gm06	17950985	17954921	-	95003	GO:0055114;GO:0016491	AT5G07800		Flavin-binding_monooxygenase_family_protein	Flavin-binding monooxygenase family protein;(source:Araport11) protein_coding	FALSE	10	Cortex, Pericycle, Vascular bundle/Xylem pole pericycle, Stele, Endodermis, Epidermis, Xylem, Vascular bundle, Metaphloem, Cluster13	turquoise	Root
Gm06_17855981	Medians_FarmCPU	Biomass_area	3.72e-11	17855980	17855982	Glyma.06G197100	Gm06	17759690	17760739	-	-95242	GO:0005515	AT3G06240		F-box_family_protein	F-box family protein;(source:Araport11) protein_coding	FALSE			darkmagenta	Unassigned
Gm06_17855981	Medians_FarmCPU	Biomass_area	3.72e-11	17855980	17855982	Glyma.06G197000	Gm06	17741768	17742838	-	-113143	GO:0005515	AT3G06240		F-box_family_protein	F-box family protein;(source:Araport11) protein_coding	FALSE			grey	Leaf
Gm06_17855981	Medians_FarmCPU	Biomass_area	3.72e-11	17855980	17855982	Glyma.06G196900	Gm06	17719096	17726665	-	-129316	GO:0006468;GO:0004672	AT1G18670	IBS1	Protein_kinase_superfamily_protein	Encodes a cyclin-dependent kinase-like protein with a ser/thr protein kinase domain and an N-terminal myristoylation sequence. Mutants in this gene are unable to express female sterility in response to beta-aminobutyric acid, as wild type plants do. protein_coding IMPAIRED IN BABA-INDUCED STERILITY 1 (IBS1) IMPAIRED IN BABA-INDUCED STERILITY 1 (IBS1)	FALSE	10	Cortex, Pericycle, Vascular bundle/Xylem pole pericycle, Stele, Endodermis, Epidermis, Xylem, Vascular bundle, Metaphloem, Cluster13	blue	Leaf
Gm06_17855981	Medians_FarmCPU	Biomass_area	3.72e-11	17855980	17855982	Glyma.06G198300	Gm06	17989109	18001815	-	133127		AT5G16100			RWP-RK domain protein;(source:Araport11) protein_coding	FALSE	4	Cortex, Vascular bundle/Xylem pole pericycle, Stele, Cluster13	grey	Leaf
Gm06_17855981	Medians_FarmCPU	Biomass_area	3.72e-11	17855980	17855982	Glyma.06G198401	Gm06	18004430	18004597	-	148448		AT2G47500		P-loop_nucleoside_triphosphate_hydrolases_superfamily_protein_with_CH_(Calponin_Homology)_domain	P-loop nucleoside triphosphate hydrolases superfamily protein with CH (Calponin Homology) domain-containing protein;(source:Araport11) protein_coding	TRUE			turquoise	Root
Gm06_17855981	Medians_FarmCPU	Biomass_area	3.72e-11	17855980	17855982	Glyma.06G198500	Gm06	18008382	18008561	-	152400						FALSE			blue	Leaf
Gm06_17855981	Medians_FarmCPU	Biomass_area	3.72e-11	17855980	17855982	Glyma.06G198550	Gm06	18009720	18011923	-	153738		AT3G52090	ATRPB13.6;NRPB11;NRPD11;NRPE11	DNA-directed_RNA_polymerase;_RBP11-like	Non-catalytic subunit common to nuclear DNA-dependent RNA polymerases II, IV and V; homologous to budding yeast RPB11 and the E. oli RNA polymerase alpha subunit. protein_coding (NRPB11) (NRPB11)	FALSE			brown	Leaf
Gm06_17855981	Medians_FarmCPU	Biomass_area	3.72e-11	17855980	17855982	Glyma.06G198600	Gm06	18013438	18014655	-	157456		AT2G03430		Ankyrin_repeat_family_protein	Ankyrin repeat family protein;(source:Araport11) protein_coding	FALSE	10	Cortex, Pericycle, Vascular bundle/Xylem pole pericycle, Stele, Endodermis, Epidermis, Xylem, Vascular bundle, Metaphloem, Cluster13	brown	Leaf
Gm06_17855981	Medians_FarmCPU	Biomass_area	3.72e-11	17855980	17855982	Glyma.06G196800	Gm06	17679258	17693839	-	-162142	GO:0045010;GO:0005884	AT5G07740		actin_binding	actin binding protein;(source:Araport11) protein_coding	FALSE	10	Cortex, Pericycle, Vascular bundle/Xylem pole pericycle, Stele, Endodermis, Epidermis, Xylem, Vascular bundle, Metaphloem, Cluster13	blue	Leaf
Gm06_17855981	Medians_FarmCPU	Biomass_area	3.72e-11	17855980	17855982	Glyma.06G198800	Gm06	18030841	18032454	-	174859		AT5G02110	CYCD7;CYCD7;1	CYCLIN_D7;1	Encodes CYCLIN D7;1. Overexpression of CYCD7;1 induces cell proliferation and cell enlargement in the embryo and endosperm leading to overgrowth. protein_coding CYCLIN D7;1 (CYCD7;1) (CYCD7);CYCLIN D7;1 (CYCD7;1)	FALSE	0		tan	Leaf
Gm14_38117630	Medians_FarmCPU	Biomass_area	2.75e-09	38117629	38117631	Glyma.14G160600	Gm14	38252891	38258034	-	135260	GO:0016987;GO:0006355;GO:0006352;GO:0003700;GO:0003677	AT5G24120	ATSIG5;SIG5;SIGE	sigma_factor_E	Encodes a specialized sigma factor that functions in regulation of plastid genes and is responsible for the light-dependent transcription at the psbD LRP. Activation of SIG5 is dependent upon blue light and mediated by cryptochromes. protein_coding SIGMA FACTOR E (SIGE) SIGMA FACTOR 5 (ATSIG5)	FALSE	10	Cortex, Pericycle, Vascular bundle/Xylem pole pericycle, Stele, Endodermis, Epidermis, Xylem, Vascular bundle, Metaphloem, Cluster13	pink	Leaf
Gm14_38117630	Medians_FarmCPU	Biomass_area	2.75e-09	38117629	38117631	Glyma.14G160700	Gm14	38338656	38342306	-	221025	GO:0046983	AT3G24140	FMA	basic_helix-loop-helix_(bHLH)_DNA-binding_superfamily_protein	Encodes a basic helix-loop-helix transcription factor whose activity is required to promote differentiation of stomatal guard cells and to halt proliferative divisions in their immediate precursors. It fulfills its role through recruitment of the Arabidopsis Retinoblastoma homologue, RETINOBLASTOMA-RELATED (RBR). Both transcript and protein are expressed in and are required for halting divisions …	FALSE	0		red	Meristem
Gm14_38117630	Medians_FarmCPU	Biomass_area	2.75e-09	38117629	38117631	Glyma.14G160200	Gm14	37873822	37874995	+	-242635	GO:0005515	AT3G23880		F-box_and_associated_interaction_domains-containing_protein	F-box and associated interaction domains-containing protein;(source:Araport11) protein_coding	FALSE
Gm14_38117630	Medians_FarmCPU	Biomass_area	2.75e-09	38117629	38117631	Glyma.14G160100	Gm14	37857725	37860537	-	-257093		AT5G53190		Nodulin_MtN3_family_protein	Nodulin MtN3 family protein;(source:Araport11) protein_coding (SWEET3) (AtSWEET3); (SWEET3)	TRUE	10	Cortex, Pericycle, Vascular bundle/Xylem pole pericycle, Stele, Endodermis, Epidermis, Xylem, Vascular bundle, Metaphloem, Cluster13	turquoise	Root
Gm19_28102691	Medians_FarmCPU	Biomass_area	2.83e-09	28102690	28102692	Glyma.19G076500	Gm19	28094841	28096460	-	-6231		AT3G27250			ABA&#8208;induced transcription repressor that acts as feedback regulator in ABA signalling. protein_coding (AITR1) DIG-LIKE 4 (DIL4); (AITR1)	FALSE	9	Cortex, Pericycle, Vascular bundle/Xylem pole pericycle, Stele, Endodermis, Epidermis, Xylem, Vascular bundle, Metaphloem	pink	Leaf
Gm19_28102691	Medians_FarmCPU	Biomass_area	2.83e-09	28102690	28102692	Glyma.19G076400	Gm19	28037928	28046100	+	-56591	GO:0020037;GO:0009055	AT5G40810		Cytochrome_C1_family	Cytochrome C1 family;(source:Araport11) protein_coding	FALSE	10	Cortex, Pericycle, Vascular bundle/Xylem pole pericycle, Stele, Endodermis, Epidermis, Xylem, Vascular bundle, Metaphloem, Cluster13	brown	Leaf
Gm19_28102691	Medians_FarmCPU	Biomass_area	2.83e-09	28102690	28102692	Glyma.19G076600	Gm19	28161864	28164135	+	59172						FALSE			blue	Leaf
Gm19_28102691	Medians_FarmCPU	Biomass_area	2.83e-09	28102690	28102692	Glyma.19G076700	Gm19	28168167	28169335	+	65475	GO:0016021	AT5G14280		DNA-binding_storekeeper_protein-related	DNA-binding storekeeper-like protein;(source:Araport11) protein_coding GEBP-LIKE PROTEIN 2 (GPL2) GEBP-LIKE PROTEIN 2 (GPL2)	TRUE	7	Cortex, Pericycle, Vascular bundle/Xylem pole pericycle, Stele, Endodermis, Epidermis, Xylem	turquoise	Root
Gm19_28102691	Medians_FarmCPU	Biomass_area	2.83e-09	28102690	28102692	Glyma.19G076300	Gm19	28030148	28035607	+	-67084		AT5G14260		Rubisco_methyltransferase_family_protein	Suppresses singlet oxygen-induced stress responses by protecting grana margins. protein_coding SAFEGUARD1 (SAFE1) SAFEGUARD1 (SAFE1)	FALSE	10	Cortex, Pericycle, Vascular bundle/Xylem pole pericycle, Stele, Endodermis, Epidermis, Xylem, Vascular bundle, Metaphloem, Cluster13	brown	Leaf
Gm19_28102691	Medians_FarmCPU	Biomass_area	2.83e-09	28102690	28102692	Glyma.19G076800	Gm19	28175571	28185259	-	72879		AT5G40780	LHT1	lysine_histidine_transporter_1	Encodes LHT1 (lysine histidine transporter), a high-affinity transporter for cellular amino acid uptake in both root epidermis and leaf mesophyll. protein_coding LYSINE HISTIDINE TRANSPORTER 1 (LHT1) (LHT1); (ATLHT1);LYSINE HISTIDINE TRANSPORTER 1 (LHT1)	TRUE	1	Vascular bundle/Xylem pole pericycle	yellow	Root
Gm19_28102691	Medians_FarmCPU	Biomass_area	2.83e-09	28102690	28102692	Glyma.19G076200	Gm19	28009352	28012772	+	-89919	GO:0005975;GO:0004553	AT5G24090	ATCHIA;CHIA	chitinase_A	Chitinase A (class III) expressed exclusively under environmental stress conditions. Shown be a plant lysozyme involved in plant immunity. protein_coding CHITINASE A (CHIA) CHITINASE A (ATCHIA);LYSOZYME 1 (LYS1);CHITINASE A (CHIA)	FALSE	4	Cortex, Pericycle, Stele, Epidermis	magenta	Leaf
Gm19_28102691	Medians_FarmCPU	Biomass_area	2.83e-09	28102690	28102692	Glyma.19G076901	Gm19	28208458	28209387	+	105766						TRUE	5	Cortex, Pericycle, Vascular bundle/Xylem pole pericycle, Stele, Endodermis	turquoise	Root
Gm19_28102691	Medians_FarmCPU	Biomass_area	2.83e-09	28102690	28102692	Glyma.19G077000	Gm19	28233190	28237751	-	130498		AT3G01750		Ankyrin_repeat_family_protein	Ankyrin repeat family protein;(source:Araport11) protein_coding	FALSE	10	Cortex, Pericycle, Vascular bundle/Xylem pole pericycle, Stele, Endodermis, Epidermis, Xylem, Vascular bundle, Metaphloem, Cluster13	blue	Leaf
Gm19_28102691	Medians_FarmCPU	Biomass_area	2.83e-09	28102690	28102692	Glyma.19G077050	Gm19	28239923	28240090	-	137231						FALSE			grey	Leaf
Gm19_28102691	Medians_FarmCPU	Biomass_area	2.83e-09	28102690	28102692	Glyma.19G077100	Gm19	28241748	28243425	-	139056		AT5G14290		Mitochondrial_ribosomal_protein_L37	Mitochondrial ribosomal protein L37;(source:Araport11) protein_coding	FALSE	10	Cortex, Pericycle, Vascular bundle/Xylem pole pericycle, Stele, Endodermis, Epidermis, Xylem, Vascular bundle, Metaphloem, Cluster13	blue	Leaf
Gm19_28102691	Medians_FarmCPU	Biomass_area	2.83e-09	28102690	28102692	Glyma.19G077200	Gm19	28272432	28276193	-	169740	GO:0005515	AT3G26000		Ribonuclease_inhibitor	RIPF1 is an F-Box E3 ligase that interacts with the ABA receptor RCAR3 and appears to be responsible for facilitating its turnover. protein_coding RCAR3 INTERACTING F-BOX PROTEIN 1 (RIFP1) RCAR3 INTERACTING F-BOX PROTEIN 1 (RIFP1)	FALSE	10	Cortex, Pericycle, Vascular bundle/Xylem pole pericycle, Stele, Endodermis, Epidermis, Xylem, Vascular bundle, Metaphloem, Cluster13	blue	Leaf
Gm19_28102691	Medians_FarmCPU	Biomass_area	2.83e-09	28102690	28102692	Glyma.19G076000	Gm19	27922045	27924716	-	-177975		AT1G37113			hypothetical protein;(source:Araport11) protein_coding MOVEMENT PROTEIN (MP) MOVEMENT PROTEIN (MP)	FALSE			turquoise	Root
Gm19_28102691	Medians_FarmCPU	Biomass_area	2.83e-09	28102690	28102692	Glyma.19G075800	Gm19	27905075	27915034	-	-187657	GO:0008152;GO:0003824	AT5G63380		AMP-dependent_synthetase_and_ligase_family_protein	Encodes a peroxisomal protein involved in the activation of fatty acids through esterification with CoA. At5g63380 preferentially activates fatty acids with increased chain length (C9:0 to C8:0) and thus shares characteristics with long-chain fatty acyl-CoA synthases. Also able to catalyze the conversion of OPDA to its CoA ester and is therefore thought to be involved in the peroxisomal &#946;-ox…	FALSE	9	Cortex, Pericycle, Vascular bundle/Xylem pole pericycle, Stele, Endodermis, Epidermis, Xylem, Vascular bundle, Metaphloem	blue	Leaf
Gm19_28102691	Medians_FarmCPU	Biomass_area	2.83e-09	28102690	28102692	Glyma.19G077300	Gm19	28297593	28307018	-	194901	GO:0055114;GO:0050661;GO:0006006;GO:0004345	AT5G40760	G6PD6	glucose-6-phosphate_dehydrogenase_6	Encodes a cytosolic glucose-6-phosphate dehydrogenase that is insensitive to reduction by DTT and whose mRNA is expressed ubiquitously. The mRNA is cell-to-cell mobile. protein_coding GLUCOSE-6-PHOSPHATE DEHYDROGENASE 6 (G6PD6) GLUCOSE-6-PHOSPHATE DEHYDROGENASE 6 (G6PD6)	FALSE	10	Cortex, Pericycle, Vascular bundle/Xylem pole pericycle, Stele, Endodermis, Epidermis, Xylem, Vascular bundle, Metaphloem, Cluster13	brown	Leaf
Gm19_28102691	Medians_FarmCPU	Biomass_area	2.83e-09	28102690	28102692	Glyma.19G075700	Gm19	27883555	27890969	+	-211722	GO:0005515	AT5G14250	COP13;CSN3;FUS11	Proteasome_component_(PCI)_domain_protein	Encodes subunit 3 of the COP9 signalosome. protein_coding CONSTITUTIVE PHOTOMORPHOGENIC 13 (COP13) CONSTITUTIVE PHOTOMORPHOGENIC 13 (COP13);FUSCA 11 (FUS11);COP9 SIGNALOSOME SUBUNIT 3 (CSN3)	TRUE	10	Cortex, Pericycle, Vascular bundle/Xylem pole pericycle, Stele, Endodermis, Epidermis, Xylem, Vascular bundle, Metaphloem, Cluster13	turquoise	Root
Gm19_28102691	Medians_FarmCPU	Biomass_area	2.83e-09	28102690	28102692	Glyma.19G075600	Gm19	27823253	27828744	-	-273947		AT5G14240		Thioredoxin_superfamily_protein	Thioredoxin superfamily protein;(source:Araport11) protein_coding	TRUE	10	Cortex, Pericycle, Vascular bundle/Xylem pole pericycle, Stele, Endodermis, Epidermis, Xylem, Vascular bundle, Metaphloem, Cluster13	turquoise	Root
Gm19_28102691	Medians_FarmCPU	Biomass_area	2.83e-09	28102690	28102692	Glyma.19G077400	Gm19	28398347	28399254	-	295655						TRUE	7	Cortex, Pericycle, Vascular bundle/Xylem pole pericycle, Stele, Endodermis, Epidermis, Xylem	turquoise	Root
Gm20_17925110	Medians_FarmCPU	Biomass_area	8.14e-09	17925109	17925111	Glyma.20G058501	Gm20	17897565	17897714	+	-27396						FALSE
Gm20_17925110	Medians_FarmCPU	Biomass_area	8.14e-09	17925109	17925111	Glyma.20G058400	Gm20	17859835	17896117	+	-28993		AT2G31340	emb1381	embryo_defective_1381	embryo defective 1381;(source:Araport11) protein_coding EMBRYO DEFECTIVE 1381 (emb1381) EMBRYO DEFECTIVE 1381 (emb1381)	FALSE	10	Cortex, Pericycle, Vascular bundle/Xylem pole pericycle, Stele, Endodermis, Epidermis, Xylem, Vascular bundle, Metaphloem, Cluster13	blue	Leaf
Gm20_17925110	Medians_FarmCPU	Biomass_area	8.14e-09	17925109	17925111	Glyma.20G058500	Gm20	17702670	17731410	+	-193700		AT5G35690			WT-like growth phenotype mutants of WSS1B do not display hypersensitivities after treatment with DNA-Protein crosslink inducing agents like camptothecin or cis-platin. protein_coding WSS1/SPRTN TYPE REPAIR PROTEASE B (WSS1B) WSS1/SPRTN TYPE REPAIR PROTEASE B (WSS1B)	TRUE	10	Cortex, Pericycle, Vascular bundle/Xylem pole pericycle, Stele, Endodermis, Epidermis, Xylem, Vascular bundle, Metaphloem, Cluster13	turquoise	Root
Gm20_17925110	Medians_FarmCPU	Biomass_area	8.14e-09	17925109	17925111	Glyma.20G058200	Gm20	18177566	18185635	+	252455	GO:0006412;GO:0005840;GO:0003735	AT3G01790		Ribosomal_protein_L13_family_protein	Ribosomal protein L13 family protein;(source:Araport11) protein_coding	FALSE	0
Gm03_38698646	Medians_FarmCPU	Convex_hull_area	1.22e-13	38698645	38698647	Glyma.03G160100	Gm03	38694932	38696965	-	-1681	GO:0055114;GO:0020037;GO:0016705;GO:0005506	AT5G63450	CYP94B1	cytochrome_P450;_family_94;_subfamily_B;_polypeptide_1	AtWRKY33 regulates root apoplastic barrier formation by controlling AtCYP94B1 leading to increased salt tolerance of Arabidopsis plants. Regulation by WRKY33 to control apoplastic barrier formation in roots to confer salt tolerance. protein_coding CYTOCHROME P450, FAMILY 94, SUBFAMILY B, POLYPEPTIDE 1 (CYP94B1) CYTOCHROME P450, FAMILY 94, SUBFAMILY B, POLYPEPTIDE 1 (CYP94B1)	TRUE	3	Cortex, Pericycle, Endodermis	yellow	Root
Gm03_38698646	Medians_FarmCPU	Convex_hull_area	1.22e-13	38698645	38698647	Glyma.03G160200	Gm03	38703552	38705474	+	4905	GO:0055114;GO:0020037;GO:0016705;GO:0005506	AT5G63450	CYP94B1	cytochrome_P450;_family_94;_subfamily_B;_polypeptide_1	AtWRKY33 regulates root apoplastic barrier formation by controlling AtCYP94B1 leading to increased salt tolerance of Arabidopsis plants. Regulation by WRKY33 to control apoplastic barrier formation in roots to confer salt tolerance. protein_coding CYTOCHROME P450, FAMILY 94, SUBFAMILY B, POLYPEPTIDE 1 (CYP94B1) CYTOCHROME P450, FAMILY 94, SUBFAMILY B, POLYPEPTIDE 1 (CYP94B1)	TRUE	8	Cortex, Pericycle, Vascular bundle/Xylem pole pericycle, Stele, Endodermis, Epidermis, Xylem, Metaphloem	yellow	Root
Gm03_38698646	Medians_FarmCPU	Convex_hull_area	1.22e-13	38698645	38698647	Glyma.03G160000	Gm03	38684105	38688892	+	-9754	GO:0003723	AT3G04610	FLK	RNA-binding_KH_domain-containing_protein	RNA-binding KH domain-containing protein;(source:Araport11) protein_coding FLOWERING LOCUS KH DOMAIN (FLK) (ATKH11);FLOWERING LOCUS KH DOMAIN (FLK)	FALSE	10	Cortex, Pericycle, Vascular bundle/Xylem pole pericycle, Stele, Endodermis, Epidermis, Xylem, Vascular bundle, Metaphloem, Cluster13	turquoise	Root
Gm03_38698646	Medians_FarmCPU	Convex_hull_area	1.22e-13	38698645	38698647	Glyma.03G160300	Gm03	38711991	38713760	+	13344	GO:0055114;GO:0020037;GO:0016705;GO:0005506	AT5G63450	CYP94B1	cytochrome_P450;_family_94;_subfamily_B;_polypeptide_1	AtWRKY33 regulates root apoplastic barrier formation by controlling AtCYP94B1 leading to increased salt tolerance of Arabidopsis plants. Regulation by WRKY33 to control apoplastic barrier formation in roots to confer salt tolerance. protein_coding CYTOCHROME P450, FAMILY 94, SUBFAMILY B, POLYPEPTIDE 1 (CYP94B1) CYTOCHROME P450, FAMILY 94, SUBFAMILY B, POLYPEPTIDE 1 (CYP94B1)	TRUE	8	Cortex, Pericycle, Vascular bundle/Xylem pole pericycle, Stele, Epidermis, Xylem, Vascular bundle, Metaphloem	yellow	Root
Gm03_38698646	Medians_FarmCPU	Convex_hull_area	1.22e-13	38698645	38698647	Glyma.03G160400	Gm03	38718233	38719006	+	19586						TRUE	0		yellow	Root
Gm03_38698646	Medians_FarmCPU	Convex_hull_area	1.22e-13	38698645	38698647	Glyma.03G159900	Gm03	38668019	38678093	-	-20553	GO:0016301;GO:0005524	AT2G30630		P-loop_containing_nucleoside_triphosphate_hydrolases_superfamily_protein	P-loop containing nucleoside triphosphate hydrolases superfamily protein;(source:Araport11) protein_coding	FALSE	2	Cortex, Vascular bundle/Xylem pole pericycle	salmon	Unassigned
Gm03_38698646	Medians_FarmCPU	Convex_hull_area	1.22e-13	38698645	38698647	Glyma.03G160466	Gm03	38734888	38735476	+	36241						FALSE	0		skyblue1	Unassigned
Gm03_38698646	Medians_FarmCPU	Convex_hull_area	1.22e-13	38698645	38698647	Glyma.03G159800	Gm03	38659992	38661353	-	-37293	GO:0006355;GO:0003700	AT1G50640	ATERF3;ERF3	ethylene_responsive_element_binding_factor_3	encodes a member of the ERF (ethylene response factor) subfamily B-1 of ERF/AP2 transcription factor family (ATERF-3). The protein contains one AP2 domain. There are 15 members in this subfamily including ATERF-3, ATERF-4, ATERF-7, and leafy petiole. protein_coding ETHYLENE RESPONSIVE ELEMENT BINDING FACTOR 3 (ERF3) (ATERF3);ETHYLENE RESPONSIVE ELEMENT BINDING FACTOR 3 (ERF3)	TRUE	8	Cortex, Pericycle, Vascular bundle/Xylem pole pericycle, Stele, Endodermis, Epidermis, Xylem, Vascular bundle	yellow	Root
Gm03_38698646	Medians_FarmCPU	Convex_hull_area	1.22e-13	38698645	38698647	Glyma.03G159700	Gm03	38654927	38657722	+	-40924	GO:0043565;GO:0006355;GO:0003700	AT2G30590	WRKY21	WRKY_DNA-binding_protein_21	Encodes WRKY DNA-binding protein 21 (WRKY21). protein_coding WRKY DNA-BINDING PROTEIN 21 (WRKY21) WRKY DNA-BINDING PROTEIN 21 (WRKY21)	FALSE	8	Cortex, Pericycle, Vascular bundle/Xylem pole pericycle, Stele, Endodermis, Epidermis, Xylem, Cluster13	blue	Leaf
Gm03_38698646	Medians_FarmCPU	Convex_hull_area	1.22e-13	38698645	38698647	Glyma.03G160532	Gm03	38740591	38740970	+	41944						FALSE	0		grey60	Root
Gm03_38698646	Medians_FarmCPU	Convex_hull_area	1.22e-13	38698645	38698647	Glyma.03G160600	Gm03	38745771	38750317	-	47124	GO:0005515	AT4G03030		Galactose_oxidase/kelch_repeat_superfamily_protein	Galactose oxidase/kelch repeat superfamily protein;(source:Araport11) protein_coding	TRUE	9	Cortex, Pericycle, Vascular bundle/Xylem pole pericycle, Stele, Endodermis, Epidermis, Xylem, Vascular bundle, Metaphloem	turquoise	Root
Gm03_38698646	Medians_FarmCPU	Convex_hull_area	1.22e-13	38698645	38698647	Glyma.03G159600	Gm03	38649999	38651317	-	-47329		AT1G55190	PRA1.F2;PRA7	PRA1_(Prenylated_rab_acceptor)_family_protein	PRA1 (Prenylated rab acceptor) family protein;(source:Araport11) protein_coding (PRA7) (PRA7);PRENYLATED RAB ACCEPTOR 1.F2 (PRA1.F2)	TRUE	7	Cortex, Pericycle, Vascular bundle/Xylem pole pericycle, Stele, Endodermis, Epidermis, Xylem	yellow	Root
Gm03_38698646	Medians_FarmCPU	Convex_hull_area	1.22e-13	38698645	38698647	Glyma.03G159500	Gm03	38642197	38647657	+	-50989	GO:0046872	AT2G30580	DRIP2	DREB2A-interacting_protein_2	Encodes a C3HC4 RING-domain-containing ubiquitin E3 ligase capable of interacting with DREB2A. DRIP2 seems to be involved in regulating stress-related transcriptional changes and drought tolerance. protein_coding DREB2A-INTERACTING PROTEIN 2 (DRIP2) (ATDRIP2); (BMI1A);DREB2A-INTERACTING PROTEIN 2 (DRIP2)	FALSE	8	Cortex, Pericycle, Vascular bundle/Xylem pole pericycle, Stele, Endodermis, Epidermis, Xylem, Cluster13	turquoise	Root
Gm03_38698646	Medians_FarmCPU	Convex_hull_area	1.22e-13	38698645	38698647	Glyma.03G159400	Gm03	38633786	38637947	+	-60699	GO:0055085;GO:0046873;GO:0030001;GO:0016020	AT5G09690	ATMGT7;MGT7;MRS2-7	magnesium_transporter_7	Transmembrane magnesium transporter. One of nine family members. Loss of function mutants exhibit poor growth under magnesium stress conditions. Splice variant AT5G09690.1 (386 aa) is a functional transporter while AT5G09690.4 (371 aa) does not have transporter activity. protein_coding MAGNESIUM TRANSPORTER 7 (MGT7) (MRS2-7);MAGNESIUM TRANSPORTER 7 (MGT7);ARABIDOPSIS THALIANA MAGNESIUM TRANSPORTE…	FALSE	8	Cortex, Pericycle, Vascular bundle/Xylem pole pericycle, Stele, Endodermis, Epidermis, Xylem, Vascular bundle	brown	Leaf
Gm03_38698646	Medians_FarmCPU	Convex_hull_area	1.22e-13	38698645	38698647	Glyma.03G160700	Gm03	38760682	38761964	+	62035		AT2G42410	ATZFP11;ZFP11	zinc_finger_protein_11	Encodes a zinc finger protein ZFP11. Overexpression of ZFP11 causes mortality and a deformed phenotype. protein_coding ZINC FINGER PROTEIN 11 (ZFP11) ZINC FINGER PROTEIN 11 (ATZFP11);ZINC FINGER PROTEIN 11 (ZFP11)	FALSE	1	Cortex	turquoise	Root
Gm03_38698646	Medians_FarmCPU	Convex_hull_area	1.22e-13	38698645	38698647	Glyma.03G159300	Gm03	38626934	38628171	+	-70475						FALSE	7	Cortex, Pericycle, Vascular bundle/Xylem pole pericycle, Stele, Endodermis, Epidermis, Xylem	grey	Leaf
Gm03_38698646	Medians_FarmCPU	Convex_hull_area	1.22e-13	38698645	38698647	Glyma.03G160800	Gm03	38773708	38776148	-	75061	GO:0046983	AT1G19260		TTF-type_zinc_finger_protein_with_HAT_dimerisation_domain	Encodes a ceramide synthase that uses very-long- chain fatty acyl-CoA and trihydroxy LCB substrates. protein_coding (LOH3) (LOH3)	FALSE
Gm03_38698646	Medians_FarmCPU	Convex_hull_area	1.22e-13	38698645	38698647	Glyma.03G159200	Gm03	38616239	38622371	-	-76275	GO:0016757;GO:0047262	AT1G06780	GAUT6	galacturonosyltransferase_6	Encodes a protein with putative galacturonosyltransferase activity. Required for synthesis of native homogalacturonan in growing pollen tubes; critical role in pollen tube growh and male fertility. protein_coding GALACTURONOSYLTRANSFERASE 6 (GAUT6) GALACTURONOSYLTRANSFERASE 6 (GAUT6)	TRUE	10	Cortex, Pericycle, Vascular bundle/Xylem pole pericycle, Stele, Endodermis, Epidermis, Xylem, Vascular bundle, Metaphloem, Cluster13	turquoise	Root
Gm03_38698646	Medians_FarmCPU	Convex_hull_area	1.22e-13	38698645	38698647	Glyma.03G160900	Gm03	38778902	38779438	+	80255		AT5G43540		C2H2_and_C2HC_zinc_fingers_superfamily_protein	C2H2 and C2HC zinc fingers superfamily protein;(source:Araport11) protein_coding	TRUE			turquoise	Root
Gm03_38698646	Medians_FarmCPU	Convex_hull_area	1.22e-13	38698645	38698647	Glyma.03G159100	Gm03	38614563	38615968	-	-82678	GO:0015979;GO:0009523;GO:0009507	AT2G30570	PSBW	photosystem_II_reaction_center_W	Encodes PsbW, a protein similar to photosystem II reaction center subunit W. Loss of PsbW destabilizes the supramolecular organization of PSII. protein_coding PHOTOSYSTEM II REACTION CENTER W (PSBW) PHOTOSYSTEM II REACTION CENTER W (PSBW)	FALSE	8	Cortex, Pericycle, Vascular bundle/Xylem pole pericycle, Stele, Endodermis, Epidermis, Xylem, Vascular bundle	turquoise	Root
Gm06_41838269	Medians_FarmCPU	Convex_hull_area	7.86e-09	41838268	41838270	Glyma.06G250600	Gm06	41837660	41843693	-	0		AT5G05800			Myb/SANT-like DNA-binding domain protein;(source:Araport11) protein_coding	FALSE	3	Cortex, Vascular bundle/Xylem pole pericycle, Stele	grey	Leaf
Gm06_41838269	Medians_FarmCPU	Convex_hull_area	7.86e-09	41838268	41838270	Glyma.06G250700	Gm06	41875715	41878193	-	37445		AT4G37210		Tetratricopeptide_repeat_(TPR)-like_superfamily_protein	Encodes a predominantly nuclear histone chaperone that promotes [H3-H4]2 tetrasome formation and does not promote disassembly of in vitro preassembled tetrasomes. protein_coding NUCLEAR AUTOANTIGENIC SPERM PROTEIN (NASP) NUCLEAR AUTOANTIGENIC SPERM PROTEIN (NASP)	FALSE	0		salmon	Unassigned
Gm06_41838269	Medians_FarmCPU	Convex_hull_area	7.86e-09	41838268	41838270	Glyma.06G250500	Gm06	41782601	41789521	+	-48748		AT2G20825	ULT2	Developmental_regulator;_ULTRAPETALA	Developmental regulator, ULTRAPETALA;(source:Araport11) protein_coding ULTRAPETALA 2 (ULT2) ULTRAPETALA 2 (ULT2)	FALSE	1	Epidermis	grey	Leaf
Gm06_41838269	Medians_FarmCPU	Convex_hull_area	7.86e-09	41838268	41838270	Glyma.06G250751	Gm06	41899480	41900035	+	61210						FALSE			blue	Leaf
Gm06_41838269	Medians_FarmCPU	Convex_hull_area	7.86e-09	41838268	41838270	Glyma.06G250400	Gm06	41758805	41765416	+	-72853		AT2G20825	ULT2	Developmental_regulator;_ULTRAPETALA	Developmental regulator, ULTRAPETALA;(source:Araport11) protein_coding ULTRAPETALA 2 (ULT2) ULTRAPETALA 2 (ULT2)	FALSE	1	Epidermis
Gm06_41838269	Medians_FarmCPU	Convex_hull_area	7.86e-09	41838268	41838270	Glyma.06G250901	Gm06	41939589	41942068	+	101319		AT2G20825	ULT2	Developmental_regulator;_ULTRAPETALA	Developmental regulator, ULTRAPETALA;(source:Araport11) protein_coding ULTRAPETALA 2 (ULT2) ULTRAPETALA 2 (ULT2)	FALSE	4	Cortex, Vascular bundle/Xylem pole pericycle, Stele, Endodermis	grey	Leaf
Gm06_41838269	Medians_FarmCPU	Convex_hull_area	7.86e-09	41838268	41838270	Glyma.06G250300	Gm06	41722952	41732844	+	-105425		AT2G20825	ULT2	Developmental_regulator;_ULTRAPETALA	Developmental regulator, ULTRAPETALA;(source:Araport11) protein_coding ULTRAPETALA 2 (ULT2) ULTRAPETALA 2 (ULT2)	FALSE	1	Vascular bundle	brown	Leaf
Gm06_41838269	Medians_FarmCPU	Convex_hull_area	7.86e-09	41838268	41838270	Glyma.06G250100	Gm06	41697249	41702504	+	-135765	GO:0005515	AT3G13682	LDL2	LSD1-like2	Encodes a homolog of human Lysine-Specific Demethylase1. Involved in H3K4 methylation of target genes including the flowering loci FLC and FWA. protein_coding LSD1-LIKE2 (LDL2) LSD1-LIKE2 (LDL2)	FALSE	10	Cortex, Pericycle, Vascular bundle/Xylem pole pericycle, Stele, Endodermis, Epidermis, Xylem, Vascular bundle, Metaphloem, Cluster13	brown	Leaf
Gm06_41838269	Medians_FarmCPU	Convex_hull_area	7.86e-09	41838268	41838270	Glyma.06G249800	Gm06	41614674	41616113	+	-222156	GO:0009607;GO:0006952	AT5G45870	PYL12;RCAR6	PYR1-like_12	Encodes a member of the PYR (pyrabactin resistance )/PYL(PYR1-like)/RCAR (regulatory components of ABA receptor) family proteins with 14 members. PYR/PYL/RCAR family proteins function as abscisic acid sensors. Mediate ABA-dependent regulation of protein phosphatase 2Cs ABI1 and ABI2. protein_coding PYR1-LIKE 12 (PYL12) REGULATORY COMPONENTS OF ABA RECEPTOR 6 (RCAR6);PYR1-LIKE 12 (PYL12)	TRUE	10	Cortex, Pericycle, Vascular bundle/Xylem pole pericycle, Stele, Endodermis, Epidermis, Xylem, Vascular bundle, Metaphloem, Cluster13	turquoise	Root
Gm06_41838269	Medians_FarmCPU	Convex_hull_area	7.86e-09	41838268	41838270	Glyma.06G249700	Gm06	41597488	41599462	-	-238807		AT5G54370		Late_embryogenesis_abundant_(LEA)_protein-related	Late embryogenesis abundant (LEA) protein-like protein;(source:Araport11) protein_coding	TRUE	10	Cortex, Pericycle, Vascular bundle/Xylem pole pericycle, Stele, Endodermis, Epidermis, Xylem, Vascular bundle, Metaphloem, Cluster13	turquoise	Root
Gm06_41838269	Medians_FarmCPU	Convex_hull_area	7.86e-09	41838268	41838270	Glyma.06G249600	Gm06	41555643	41556396	+	-281873		AT1G52855			hypothetical protein;(source:Araport11) protein_coding	TRUE	0		yellow	Root
Gm06_41838269	Medians_FarmCPU	Convex_hull_area	7.86e-09	41838268	41838270	Glyma.06G249500	Gm06	41538584	41544291	-	-293978	GO:0046854	AT5G54390	AHL;ATAHL;HL	HAL2-like	Encodes a 3-phosphoadenosine-5-phosphate (PAP) phosphatase that is sensitive to physiological concentrations of Na+. It does not also act as inositol polyphosphate 1-phosphatases, which other members of the HAL2-like family do. It is proposed that AHL acts in concert with sulphotransferases to prevent both the toxicity of PAP on RNA processing enzymes as well as the product inhibition of PAP on s…	FALSE	7	Cortex, Pericycle, Vascular bundle/Xylem pole pericycle, Stele, Endodermis, Epidermis, Cluster13	turquoise	Root
Gm08_43556802	Medians_FarmCPU	Convex_hull_area	2.96e-10	43556801	43556803	Glyma.08G323200	Gm08	43554151	43558420	-	0	GO:0043531	AT3G07040	RPM1;RPS3	NB-ARC_domain-containing_disease_resistance_protein	Contains an N-terminal tripartite nucleotide binding site and a C-terminal tandem array of leucine-rich repeats. Confers resistance to Pseudomonas syringae strains that carry the avirulence genes avrB and avrRpm1. protein_coding RESISTANCE TO P. SYRINGAE PV MACULICOLA 1 (RPM1) RESISTANCE TO PSEUDOMONAS SYRINGAE 3 (RPS3);RESISTANCE TO P. SYRINGAE PV MACULICOLA 1 (RPM1)	TRUE	10	Cortex, Pericycle, Vascular bundle/Xylem pole pericycle, Stele, Endodermis, Epidermis, Xylem, Vascular bundle, Metaphloem, Cluster13	turquoise	Root
Gm08_43556802	Medians_FarmCPU	Convex_hull_area	2.96e-10	43556801	43556803	Glyma.08G323300	Gm08	43567631	43570790	-	10828		AT4G26900	AT-HF;HISN4	HIS_HF	encodes a glutamine amidotransferase and cyclase, catalyzes the fifth and sixth steps of the histidine biosynthetic pathway protein_coding HIS HF (AT-HF) (HISN4);HIS HF (AT-HF)	FALSE	10	Cortex, Pericycle, Vascular bundle/Xylem pole pericycle, Stele, Endodermis, Epidermis, Xylem, Vascular bundle, Metaphloem, Cluster13	orangered4	Unassigned
Gm08_43556802	Medians_FarmCPU	Convex_hull_area	2.96e-10	43556801	43556803	Glyma.08G323400	Gm08	43571824	43573416	-	15021		AT5G55380		MBOAT_(membrane_bound_O-acyl_transferase)_family_protein	MBOAT (membrane bound O-acyl transferase) family protein;(source:Araport11) protein_coding	TRUE	10	Cortex, Pericycle, Vascular bundle/Xylem pole pericycle, Stele, Endodermis, Epidermis, Xylem, Vascular bundle, Metaphloem, Cluster13	turquoise	Root
Gm08_43556802	Medians_FarmCPU	Convex_hull_area	2.96e-10	43556801	43556803	Glyma.08G323100	Gm08	43536773	43538041	-	-18761		AT5G55380		MBOAT_(membrane_bound_O-acyl_transferase)_family_protein	MBOAT (membrane bound O-acyl transferase) family protein;(source:Araport11) protein_coding	TRUE	8	Cortex, Pericycle, Vascular bundle/Xylem pole pericycle, Stele, Endodermis, Epidermis, Xylem, Vascular bundle	turquoise	Root
Gm08_43556802	Medians_FarmCPU	Convex_hull_area	2.96e-10	43556801	43556803	Glyma.08G323000	Gm08	43534188	43536992	+	-19810		AT5G55510		Mitochondrial_import_inner_membrane_translocase_subunit_Tim17/Tim22/Tim23_family_protein	PRAT protein family which has a unique system for importing and exporting proteins from chloroplasts. Acts in the export of proteins from chloroplasts during leaf senescence. protein_coding HYPOTHETICAL PROTEIN 22 (HP22) HYPOTHETICAL PROTEIN 22 (HP22)	FALSE	0		grey	Leaf
Gm08_43556802	Medians_FarmCPU	Convex_hull_area	2.96e-10	43556801	43556803	Glyma.08G323500	Gm08	43576857	43581212	-	20054		AT5G41370	ATXPB1;XPB1	homolog_of_xeroderma_pigmentosum_complementation_group_B_1	Encodes XPB1, a DNA repair protein and transcription factor. Arabidopsis thaliana has duplicated XPB gene (AtXPB1 and AtXPB2, with high similarity to each other). XPB proteins are involved in both DNA repair and transcription, they are component of the transcription factor IIH (TFIIH) and are responsible for DNA helicase activity during nucleotide (nt) excision repair (NER). Complementation assay…	FALSE	2	Cortex, Vascular bundle/Xylem pole pericycle	purple	Hypocotyl
Gm08_43556802	Medians_FarmCPU	Convex_hull_area	2.96e-10	43556801	43556803	Glyma.08G322900	Gm08	43530765	43533342	+	-23460	GO:0033179;GO:0015991;GO:0015078	AT5G55290		ATPase;_V0_complex;_subunit_E	Member of V-ATPase family. Vacuolar-type H + -ATPase (V-ATPase) is a multisubunit proton pump located on the endomembranes. protein_coding (VHA-E1) (VHA-E1)	FALSE	10	Cortex, Pericycle, Vascular bundle/Xylem pole pericycle, Stele, Endodermis, Epidermis, Xylem, Vascular bundle, Metaphloem, Cluster13	turquoise	Root
Gm08_43556802	Medians_FarmCPU	Convex_hull_area	2.96e-10	43556801	43556803	Glyma.08G322800	Gm08	43526666	43529988	+	-26814	GO:0003924	AT5G55280	ATFTSZ1-1;CPFTSZ;FTSZ1-1	homolog_of_bacterial_cytokinesis_Z-ring_protein_FTSZ_1-1	Encodes one of two FtsZ proteins, tubulin-like proteins, in Arabidopsis. It is involved in chloroplast division. protein_coding HOMOLOG OF BACTERIAL CYTOKINESIS Z-RING PROTEIN FTSZ 1-1 (FTSZ1-1) HOMOLOG OF BACTERIAL CYTOKINESIS Z-RING PROTEIN FTSZ 1-1 (FTSZ1-1); (FTSZ1);ARABIDOPSIS THALIANA HOMOLOG OF BACTERIAL CYTOKINESIS Z-RING PROTEIN FTSZ 1-1 (ATFTSZ1-1);CHLOROPLAST FTSZ (CPFTSZ)	FALSE	7	Cortex, Pericycle, Vascular bundle/Xylem pole pericycle, Stele, Endodermis, Epidermis, Xylem	brown	Leaf
Gm08_43556802	Medians_FarmCPU	Convex_hull_area	2.96e-10	43556801	43556803	Glyma.08G323600	Gm08	43585851	43587107	-	29048		AT5G55380		MBOAT_(membrane_bound_O-acyl_transferase)_family_protein	MBOAT (membrane bound O-acyl transferase) family protein;(source:Araport11) protein_coding	FALSE	6	Cortex, Pericycle, Vascular bundle/Xylem pole pericycle, Stele, Endodermis, Epidermis	yellow	Root
Gm08_43556802	Medians_FarmCPU	Convex_hull_area	2.96e-10	43556801	43556803	Glyma.08G322700	Gm08	43518172	43524970	+	-31832	GO:0006352;GO:0005634;GO:0051090	AT1G04950	ATTAF6;TAF6;TAFII59	TATA_BOX_ASSOCIATED_FACTOR_II_59	Encodes one of two Arabidopsis proteins with significant similarity to the histone fold TBP-associated factor TAF6. Mutants are embryo lethal and transmission of the mutant allele through the male gametophyte is significantly reduced. This is due to reduced pollen tube growth of the mutant. protein_coding TATA BOX ASSOCIATED FACTOR II 59 (TAFII59) EMBRYO DEFECTIVE 2781 (EMB2781); (ATTAF6);TATA BO…	FALSE	9	Cortex, Pericycle, Vascular bundle/Xylem pole pericycle, Stele, Endodermis, Epidermis, Xylem, Vascular bundle, Cluster13	turquoise	Root
Gm08_43556802	Medians_FarmCPU	Convex_hull_area	2.96e-10	43556801	43556803	Glyma.08G323700	Gm08	43588911	43590486	-	32108		AT5G55390	EDM2	ENHANCED_DOWNY_MILDEW_2	Encodes EDM2 (enhanced downy mildew 2). The predicted protein bears typical features of transcriptional regulators. EDM2 contains two putative bipartite nuclear localization signals (NLS) two zinc-finger-like motifs, a Proline-rich region and a large aspartic acid-rich region. Both zinc-finger-like stretches resemble the PHD (plant homeodomain) finger motif. Mutations in EDM2 comprise RPP7 mediat…	FALSE			blue	Leaf
Gm08_43556802	Medians_FarmCPU	Convex_hull_area	2.96e-10	43556801	43556803	Glyma.08G323800	Gm08	43594168	43595635	-	37365		AT5G55390	EDM2	ENHANCED_DOWNY_MILDEW_2	Encodes EDM2 (enhanced downy mildew 2). The predicted protein bears typical features of transcriptional regulators. EDM2 contains two putative bipartite nuclear localization signals (NLS) two zinc-finger-like motifs, a Proline-rich region and a large aspartic acid-rich region. Both zinc-finger-like stretches resemble the PHD (plant homeodomain) finger motif. Mutations in EDM2 comprise RPP7 mediat…	FALSE			brown	Leaf
Gm08_43556802	Medians_FarmCPU	Convex_hull_area	2.96e-10	43556801	43556803	Glyma.08G323850	Gm08	43595981	43601997	-	39178		AT5G55390	EDM2	ENHANCED_DOWNY_MILDEW_2	Encodes EDM2 (enhanced downy mildew 2). The predicted protein bears typical features of transcriptional regulators. EDM2 contains two putative bipartite nuclear localization signals (NLS) two zinc-finger-like motifs, a Proline-rich region and a large aspartic acid-rich region. Both zinc-finger-like stretches resemble the PHD (plant homeodomain) finger motif. Mutations in EDM2 comprise RPP7 mediat…	FALSE	9	Cortex, Pericycle, Vascular bundle/Xylem pole pericycle, Stele, Endodermis, Epidermis, Xylem, Vascular bundle, Metaphloem	brown	Leaf
Gm08_43556802	Medians_FarmCPU	Convex_hull_area	2.96e-10	43556801	43556803	Glyma.08G322600	Gm08	43511695	43516956	+	-39846	GO:0005515	AT1G16240	ATSYP51;SYP51	syntaxin_of_plants_51	Encodes one of 24 Arabidopsis syntaxins. Its mRNA has been shown to be expressed. protein_coding SYNTAXIN OF PLANTS 51 (SYP51) (ATSYP51);SYNTAXIN OF PLANTS 51 (SYP51)	TRUE	10	Cortex, Pericycle, Vascular bundle/Xylem pole pericycle, Stele, Endodermis, Epidermis, Xylem, Vascular bundle, Metaphloem, Cluster13	turquoise	Root
Gm08_43556802	Medians_FarmCPU	Convex_hull_area	2.96e-10	43556801	43556803	Glyma.08G322501	Gm08	43509522	43510076	-	-46726		AT3G20270		lipid-binding_serum_glycoprotein_family_protein	Encodes one of the two LBP/BPI related proteins (AT1G04970/LBR-1, AT3G20270/LBR-2) that bind to LPS directly and regulate PR1 expression. protein_coding (LBR-2) (LBR-2)	FALSE	0
Gm08_43556802	Medians_FarmCPU	Convex_hull_area	2.96e-10	43556801	43556803	Glyma.08G324000	Gm08	43604989	43609204	+	48186	GO:0005515	AT4G22360		SWIB_complex_BAF60b_domain-containing_protein	SWIB complex BAF60b domain-containing protein;(source:Araport11) protein_coding	FALSE	10	Cortex, Pericycle, Vascular bundle/Xylem pole pericycle, Stele, Endodermis, Epidermis, Xylem, Vascular bundle, Metaphloem, Cluster13	blue	Leaf
Gm08_43556802	Medians_FarmCPU	Convex_hull_area	2.96e-10	43556801	43556803	Glyma.08G322400	Gm08	43504210	43507202	-	-49600	GO:0008289	AT1G04970		lipid-binding_serum_glycoprotein_family_protein	Encodes one of the two LBP/BPI related proteins (AT1G04970/LBR-1, AT3G20270/LBR-2) that bind to LPS directly and regulate PR1 expression. Putative BPI/LBP family protein. protein_coding (LBR-1) (LBR-1)	FALSE	3	Cortex, Vascular bundle/Xylem pole pericycle, Cluster13	white	Unassigned
Gm08_43556802	Medians_FarmCPU	Convex_hull_area	2.96e-10	43556801	43556803	Glyma.08G324100	Gm08	43617022	43618061	+	60219		AT5G55410		Bifunctional_inhibitor/lipid-transfer_protein/seed_storage_2S_albumin_superfamily_protein	Bifunctional inhibitor/lipid-transfer protein/seed storage 2S albumin superfamily protein;(source:Araport11) protein_coding	TRUE	9	Cortex, Pericycle, Vascular bundle/Xylem pole pericycle, Stele, Endodermis, Epidermis, Xylem, Vascular bundle, Metaphloem	turquoise	Root
Gm08_43556802	Medians_FarmCPU	Convex_hull_area	2.96e-10	43556801	43556803	Glyma.08G324200	Gm08	43618234	43624284	-	61431	GO:0055085;GO:0016021;GO:0015299;GO:0006812;GO:0055075;GO:0009651;GO:0006814;GO:0005886;GO:0005774	AT5G55470	ATNHX3;NHX3	Na+/H+_(sodium_hydrogen)_exchanger_3	member of Sodium proton exchanger family protein_coding NA+/H+ (SODIUM HYDROGEN) EXCHANGER 3 (NHX3) ARABIDOPSIS THALIANA NA+/H+ (SODIUM HYDROGEN) EXCHANGER 3 (ATNHX3);NA+/H+ (SODIUM HYDROGEN) EXCHANGER 3 (NHX3)	FALSE	4	Cortex, Stele, Epidermis, Vascular bundle	purple	Hypocotyl
Gm08_43556802	Medians_FarmCPU	Convex_hull_area	2.96e-10	43556801	43556803	Glyma.08G322300	Gm08	43486568	43489905	-	-66897	GO:0008168	AT5G55250	IAMT1	IAA_carboxylmethyltransferase_1	Encodes an enzyme which specifically converts IAA to its methyl ester form MelIAA. This gene belongs to the family of carboxyl methyltransferases whose members catalyze the transfer of the methyl group from S-adenosyl-L-methionine to carboxylic acid-containing substrates to form small molecule methyl esters. Expression of TCP genes is downregulated in mutant iamt1-D. SABATH methyltransferase. pro…	TRUE	5	Cortex, Pericycle, Stele, Endodermis, Epidermis	green	Meristem
Gm11_4760258	Medians_FarmCPU	Convex_hull_area	4.53e-12	4760257	4760259	Glyma.11G062900	Gm11	4756168	4768474	-	0	GO:0030132;GO:0030130;GO:0016192;GO:0006886;GO:0005198	AT3G11130		Clathrin;_heavy_chain	CHC1 heavy chain subunit of clathrin. Involved in vesicle mediated trafficking. Mutants show reduced rates of endocytosis and defects clathrin mediated exocytosis. Mutants also have increased dehydration tolerance which may be related to the overall slower stomatal aperture dynamics. Overall growth is affected. protein_coding CLATHRIN HEAVY CHAIN 1 (CHC1) HOT ABA DEFICIENCY SUPPRESSOR 1 (HAS1); (…	FALSE	10	Cortex, Pericycle, Vascular bundle/Xylem pole pericycle, Stele, Endodermis, Epidermis, Xylem, Vascular bundle, Metaphloem, Cluster13	yellow	Root
Gm11_4760258	Medians_FarmCPU	Convex_hull_area	4.53e-12	4760257	4760259	Glyma.11G063000	Gm11	4769205	4771990	+	8946		AT5G66631		Tetratricopeptide_repeat_(TPR)-like_superfamily_protein	Tetratricopeptide repeat (TPR)-like superfamily protein;(source:Araport11) protein_coding	FALSE	8	Cortex, Pericycle, Vascular bundle/Xylem pole pericycle, Stele, Endodermis, Epidermis, Xylem, Metaphloem	brown	Leaf
Gm11_4760258	Medians_FarmCPU	Convex_hull_area	4.53e-12	4760257	4760259	Glyma.11G063100	Gm11	4772730	4774970	+	12471	GO:0006468;GO:0004672	AT2G33580		Protein_kinase_superfamily_protein	Encodes a putative LysM-containing receptor-like kinase. LYK5 is a major chitin receptor and forms a chitin-induced complex with related kinase CERK1. Based on protein sequence alignment analysis, it was determined as a pseudo kinase due to a lack of the ATP-binding P-loop in the kinase domain. protein_coding LYSM-CONTAINING RECEPTOR-LIKE KINASE 5 (LYK5) (ATLYK5);LYSM-CONTAINING RECEPTOR-LIKE KIN…	TRUE	6	Cortex, Pericycle, Vascular bundle/Xylem pole pericycle, Endodermis, Epidermis, Vascular bundle	turquoise	Root
Gm11_4760258	Medians_FarmCPU	Convex_hull_area	4.53e-12	4760257	4760259	Glyma.11G062700	Gm11	4743603	4746010	+	-14248	GO:0055114;GO:0020037;GO:0016705;GO:0005506	AT3G26300	CYP71B34	cytochrome_P450;_family_71;_subfamily_B;_polypeptide_34	putative cytochrome P450 protein_coding CYTOCHROME P450, FAMILY 71, SUBFAMILY B, POLYPEPTIDE 34 (CYP71B34) CYTOCHROME P450, FAMILY 71, SUBFAMILY B, POLYPEPTIDE 34 (CYP71B34)	TRUE	0		turquoise	Root
Gm11_4760258	Medians_FarmCPU	Convex_hull_area	4.53e-12	4760257	4760259	Glyma.11G063200	Gm11	4777368	4779674	-	17109	GO:0006468;GO:0005524;GO:0004672	AT2G23770		protein_kinase_family_protein_/_peptidoglycan-binding_LysM_domain-containing_protein	Encodes a putative LysM-containing receptor-like kinase LYK4. Shares overlapping function with LYK5 in mediating chitin-triggered immune responses. Based on protein sequence alignment analysis, it was determined as a pseudo kinase due to a lack of the ATP-binding P-loop in the kinase domain. protein_coding LYSM-CONTAINING RECEPTOR-LIKE KINASE 4 (LYK4) (ATLYK4);LYSM-CONTAINING RECEPTOR-LIKE KINASE…	FALSE	6	Cortex, Pericycle, Vascular bundle/Xylem pole pericycle, Stele, Epidermis, Xylem	yellow	Root
Gm11_4760258	Medians_FarmCPU	Convex_hull_area	4.53e-12	4760257	4760259	Glyma.11G063300	Gm11	4781512	4783037	-	21253		AT5G09280		Pectin_lyase-like_superfamily_protein	Pectin lyase-like superfamily protein;(source:Araport11) protein_coding	FALSE
Gm11_4760258	Medians_FarmCPU	Convex_hull_area	4.53e-12	4760257	4760259	Glyma.11G063400	Gm11	4786347	4791109	+	26088		AT4G36850		PQ-loop_repeat_family_protein_/_transmembrane_family_protein	PQ-loop repeat family protein / transmembrane family protein;(source:Araport11) protein_coding	FALSE	2	Pericycle, Epidermis	grey	Leaf
Gm11_4760258	Medians_FarmCPU	Convex_hull_area	4.53e-12	4760257	4760259	Glyma.11G062600	Gm11	4730070	4732519	+	-27739	GO:0055114;GO:0020037;GO:0016705;GO:0005506	AT3G26300	CYP71B34	cytochrome_P450;_family_71;_subfamily_B;_polypeptide_34	putative cytochrome P450 protein_coding CYTOCHROME P450, FAMILY 71, SUBFAMILY B, POLYPEPTIDE 34 (CYP71B34) CYTOCHROME P450, FAMILY 71, SUBFAMILY B, POLYPEPTIDE 34 (CYP71B34)	TRUE	10	Cortex, Pericycle, Vascular bundle/Xylem pole pericycle, Stele, Endodermis, Epidermis, Xylem, Vascular bundle, Metaphloem, Cluster13	turquoise	Root
Gm11_4760258	Medians_FarmCPU	Convex_hull_area	4.53e-12	4760257	4760259	Glyma.11G063500	Gm11	4793415	4795260	-	33156		AT2G23780		RING/U-box_superfamily_protein	Leucine rich extensin protein involved in cell wall biogenesis and organization. Interacts with several members of the RALF family of ligand peptides. protein_coding LEUCINE-RICH REPEAT EXTENSIN 4 (LRX4)	FALSE	9	Cortex, Pericycle, Vascular bundle/Xylem pole pericycle, Stele, Endodermis, Epidermis, Xylem, Vascular bundle, Cluster13	yellow	Root
Gm11_4760258	Medians_FarmCPU	Convex_hull_area	4.53e-12	4760257	4760259	Glyma.11G062500	Gm11	4723140	4726670	+	-33588	GO:0055114;GO:0020037;GO:0016705;GO:0005506	AT3G26300	CYP71B34	cytochrome_P450;_family_71;_subfamily_B;_polypeptide_34	putative cytochrome P450 protein_coding CYTOCHROME P450, FAMILY 71, SUBFAMILY B, POLYPEPTIDE 34 (CYP71B34) CYTOCHROME P450, FAMILY 71, SUBFAMILY B, POLYPEPTIDE 34 (CYP71B34)	TRUE	5	Cortex, Pericycle, Vascular bundle/Xylem pole pericycle, Endodermis, Epidermis	turquoise	Root
Gm11_4760258	Medians_FarmCPU	Convex_hull_area	4.53e-12	4760257	4760259	Glyma.11G063600	Gm11	4797878	4799208	+	37619	GO:0016021	AT4G36830	HOS3-1	GNS1/SUR4_membrane_protein_family	ELO family protein. protein_coding (HOS3-1) ELO HOMOLOG 4 (ELO4); (HOS3-1)	FALSE	5	Cortex, Pericycle, Endodermis, Epidermis, Xylem	turquoise	Root
Gm11_4760258	Medians_FarmCPU	Convex_hull_area	4.53e-12	4760257	4760259	Glyma.11G062400	Gm11	4713191	4719742	+	-40516	GO:0008270	AT4G36860	DAR1	LIM_domain-containing_protein	DAR1 is a member of a small (7 member) ubiquitin binding protein family. It appears to play a role in regulation of endoreduplication in leaf epidermal tissue. protein_coding DA1-RELATED PROTEIN 1 (DAR1) DA1-RELATED PROTEIN 1 (DAR1)	FALSE	9	Cortex, Pericycle, Vascular bundle/Xylem pole pericycle, Stele, Endodermis, Epidermis, Xylem, Vascular bundle, Cluster13	turquoise	Root
Gm11_4760258	Medians_FarmCPU	Convex_hull_area	4.53e-12	4760257	4760259	Glyma.11G063700	Gm11	4802054	4804411	-	41795		AT2G23790		Protein_of_unknown_function_(DUF607)	calcium uniporter (DUF607);(source:Araport11) protein_coding	FALSE	10	Cortex, Pericycle, Vascular bundle/Xylem pole pericycle, Stele, Endodermis, Epidermis, Xylem, Vascular bundle, Metaphloem, Cluster13	black	Hypocotyl
Gm11_4760258	Medians_FarmCPU	Convex_hull_area	4.53e-12	4760257	4760259	Glyma.11G063800	Gm11	4805687	4808173	-	45428		AT2G18630		Protein_of_unknown_function_(DUF677)	transmembrane protein, putative (DUF677);(source:Araport11) protein_coding	TRUE	9	Cortex, Pericycle, Vascular bundle/Xylem pole pericycle, Stele, Endodermis, Epidermis, Xylem, Metaphloem, Cluster13	turquoise	Root
Gm11_4760258	Medians_FarmCPU	Convex_hull_area	4.53e-12	4760257	4760259	Glyma.11G063900	Gm11	4815391	4816797	-	55132	GO:0008299	AT4G36810	GGPS1	geranylgeranyl_pyrophosphate_synthase_1	Encodes a protein with geranylgeranyl pyrophosphate synthase activity involved in isoprenoid biosynthesis. The enzyme appears to be targeted to the chloroplast in epidermal cells and guard cells of leaves, and in etioplasts in roots. The mRNA is cell-to-cell mobile. protein_coding GERANYLGERANYL PYROPHOSPHATE SYNTHASE 1 (GGPS1) ISOPRENYL DIPHOSPHATE SYNTHASE11 (IDS11);GERANYLGERANYL PYROPHOSPHATE…	FALSE	6	Cortex, Pericycle, Vascular bundle/Xylem pole pericycle, Stele, Epidermis, Vascular bundle	brown	Leaf
Gm11_4760258	Medians_FarmCPU	Convex_hull_area	4.53e-12	4760257	4760259	Glyma.11G064000	Gm11	4823672	4827441	+	63413		AT4G36800	RCE1	RUB1_conjugating_enzyme_1	RUB1 conjugating enzyme that conjugates CUL1 and is involved in auxin response and embryogenesis. RCE1 protein physically interacts with RBX1, which may be the E3 for CUL1. protein_coding RUB1 CONJUGATING ENZYME 1 (RCE1) RUB1 CONJUGATING ENZYME 1 (RCE1)	TRUE	10	Cortex, Pericycle, Vascular bundle/Xylem pole pericycle, Stele, Endodermis, Epidermis, Xylem, Vascular bundle, Metaphloem, Cluster13	turquoise	Root
Gm11_4760258	Medians_FarmCPU	Convex_hull_area	4.53e-12	4760257	4760259	Glyma.11G062300	Gm11	4687660	4695906	-	-64352	GO:0006355;GO:0003677	AT4G36870	BLH2;SAW1	BEL1-like_homeodomain_2	Encodes a member of the BEL family of homeodomain proteins. Plants doubly mutant for saw1/saw2 (blh2/blh4) have serrated leaves. BP is expressed in the serrated leaves, therefore saw1/saw2 may act redundantly to repress BP in leaves. Regulates together with BLH4 demethylesterification of homogalacturonan in seed mucilage. protein_coding BEL1-LIKE HOMEODOMAIN 2 (BLH2) SAWTOOTH 1 (SAW1);BEL1-LIKE H…	FALSE	10	Cortex, Pericycle, Vascular bundle/Xylem pole pericycle, Stele, Endodermis, Epidermis, Xylem, Vascular bundle, Metaphloem, Cluster13	blue	Leaf
Gm11_4760258	Medians_FarmCPU	Convex_hull_area	4.53e-12	4760257	4760259	Glyma.11G064100	Gm11	4827510	4831914	-	67251	GO:0055085;GO:0016021	AT4G36790		Major_facilitator_superfamily_protein	Major facilitator superfamily protein;(source:Araport11) protein_coding	FALSE	3	Cortex, Stele, Epidermis	turquoise	Root
Gm11_4760258	Medians_FarmCPU	Convex_hull_area	4.53e-12	4760257	4760259	Glyma.11G064200	Gm11	4835485	4835829	-	75226	GO:0004869	AT5G47550		Cystatin/monellin_superfamily_protein	Putative phytocystatin expressed in seedlings and induced by heat stress and abscisic acid. Overexpression increases germination rate and heat stress tolerance. CYS5 is a target of ABF1 and ABF3 transcriptional regulators which bind to its promoter. protein_coding CYSTEINE PROTEINASE INHIBITOR 5 (CYS5) CYSTEINE PROTEINASE INHIBITOR 5 (CYS5)	FALSE			coral2	Unassigned
Gm11_4760258	Medians_FarmCPU	Convex_hull_area	4.53e-12	4760257	4760259	Glyma.11G062200	Gm11	4676662	4680532	+	-79726		AT3G50780			BTB/POZ domain protein;(source:Araport11) protein_coding	TRUE	9	Cortex, Pericycle, Vascular bundle/Xylem pole pericycle, Stele, Endodermis, Epidermis, Xylem, Vascular bundle, Cluster13	turquoise	Root
Gm14_22180278	Medians_FarmCPU	Convex_hull_area	3.06e-09	22180277	22180279	Glyma.14G138700	Gm14	22278186	22279126	+	97907	GO:0009733	AT2G24400		SAUR-like_auxin-responsive_protein_family_	SAUR-like auxin-responsive protein family;(source:Araport11) protein_coding SMALL AUXIN UPREGULATED RNA 38 (SAUR38) SMALL AUXIN UPREGULATED RNA 38 (SAUR38)	FALSE	3	Cortex, Pericycle, Epidermis	turquoise	Root
Gm14_22180278	Medians_FarmCPU	Convex_hull_area	3.06e-09	22180277	22180279	Glyma.14G138450	Gm14	21981500	21981766	+	-198512						FALSE			darkolivegreen	Unassigned
Gm02_5521177	Medians_FarmCPU	Depth	1.74e-09	5521176	5521178	Glyma.02G061100	Gm02	5523749	5526227	-	2571	GO:0042549;GO:0019898;GO:0015979;GO:0009654;GO:0009523;GO:0005509	AT3G50820	OEC33;PSBO-2;PSBO2	photosystem_II_subunit_O-2	Encodes a protein which is an extrinsic subunit of photosystem II and which has been proposed to play a central role in stabilization of the catalytic manganese cluster. In <i>Arabidopsis thaliana</i> the PsbO proteins are encoded by two genes: <i>psbO1</i> and <i>psbO2</i>. PsbO2 is the minor isoform in the wild-type. Mutants defective in this gene have been shown to be affected in the dephospho…	FALSE	10	Cortex, Pericycle, Vascular bundle/Xylem pole pericycle, Stele, Endodermis, Epidermis, Xylem, Vascular bundle, Metaphloem, Cluster13	turquoise	Root
Gm02_5521177	Medians_FarmCPU	Depth	1.74e-09	5521176	5521178	Glyma.02G061000	Gm02	5514679	5516837	-	-4340		AT3G50810		Uncharacterised_protein_family_(UPF0497)	Uncharacterized protein family (UPF0497);(source:Araport11) protein_coding CASP-LIKE PROTEIN 5C2 (CASPL5C2) CASP-LIKE PROTEIN 5C2 (CASPL5C2)	TRUE	10	Cortex, Pericycle, Vascular bundle/Xylem pole pericycle, Stele, Endodermis, Epidermis, Xylem, Vascular bundle, Metaphloem, Cluster13	turquoise	Root
Gm02_5521177	Medians_FarmCPU	Depth	1.74e-09	5521176	5521178	Glyma.02G061300	Gm02	5531293	5536863	-	10115		AT3G50830	ATCOR413-PM2;COR413-PM2	cold-regulated_413-plasma_membrane_2	cold acclimation protein WCOR413-like protein beta form. Transcript is not detectable. protein_coding COLD-REGULATED 413-PLASMA MEMBRANE 2 (COR413-PM2) (ATCOR413-PM2);COLD-REGULATED 413-PLASMA MEMBRANE 2 (COR413-PM2)	FALSE	8	Cortex, Pericycle, Vascular bundle/Xylem pole pericycle, Stele, Endodermis, Epidermis, Vascular bundle, Metaphloem	grey	Leaf
Gm02_5521177	Medians_FarmCPU	Depth	1.74e-09	5521176	5521178	Glyma.02G060900	Gm02	5503948	5504690	-	-16487		AT2G23690			PADRE protein. protein_coding	FALSE	2	Cortex, Stele	turquoise	Root
Gm02_5521177	Medians_FarmCPU	Depth	1.74e-09	5521176	5521178	Glyma.02G061400	Gm02	5538932	5542093	-	17754		AT5G66560		Phototropic-responsive_NPH3_family_protein	Phototropic-responsive NPH3 family protein;(source:Araport11) protein_coding	FALSE	10	Cortex, Pericycle, Vascular bundle/Xylem pole pericycle, Stele, Endodermis, Epidermis, Xylem, Vascular bundle, Metaphloem, Cluster13	blue	Leaf
Gm02_5521177	Medians_FarmCPU	Depth	1.74e-09	5521176	5521178	Glyma.02G061500	Gm02	5544054	5545280	-	22876						FALSE	0		darkred	Unassigned
Gm02_5521177	Medians_FarmCPU	Depth	1.74e-09	5521176	5521178	Glyma.02G061600	Gm02	5546631	5549148	+	25453	GO:0045454;GO:0015035;GO:0006662	AT4G37200	HCF164	Thioredoxin_superfamily_protein	Encodes thioredoxin-like protein with disulfide reductase activity that is involved in the biogenesis of the plastid cytochrome b6f complex. Protein is located in the thylakoid membrane with the C-terminal hydrophilic portion, containing the thioredoxin like domain, extending into the thylakoid lumen. protein_coding HIGH CHLOROPHYLL FLUORESCENCE 164 (HCF164) HIGH CHLOROPHYLL FLUORESCENCE 164 (HCF…	TRUE	1	Cortex	turquoise	Root
Gm02_5521177	Medians_FarmCPU	Depth	1.74e-09	5521176	5521178	Glyma.02G061700	Gm02	5550322	5555012	-	29144	GO:0006468;GO:0005524;GO:0004672	AT2G23450		Protein_kinase_superfamily_protein	Protein kinase superfamily protein;(source:Araport11) protein_coding	FALSE	10	Cortex, Pericycle, Vascular bundle/Xylem pole pericycle, Stele, Endodermis, Epidermis, Xylem, Vascular bundle, Metaphloem, Cluster13	turquoise	Root
Gm02_5521177	Medians_FarmCPU	Depth	1.74e-09	5521176	5521178	Glyma.02G060800	Gm02	5487304	5488845	-	-32332		AT5G66590		CAP_(Cysteine-rich_secretory_proteins;_Antigen_5;_and_Pathogenesis-related_1_protein)_superfamily_protein	CAP (Cysteine-rich secretory proteins, Antigen 5, and Pathogenesis-related 1 protein) superfamily protein;(source:Araport11) protein_coding	FALSE	2	Cortex, Pericycle	red	Meristem
Gm02_5521177	Medians_FarmCPU	Depth	1.74e-09	5521176	5521178	Glyma.02G060732	Gm02	5481323	5486064	+	-35113		AT5G66600		Protein_of_unknown_function;_DUF547	electron transporter, putative (Protein of unknown function, DUF547);(source:Araport11) protein_coding	FALSE	9	Cortex, Pericycle, Vascular bundle/Xylem pole pericycle, Stele, Endodermis, Epidermis, Xylem, Vascular bundle, Cluster13	blue	Leaf
Gm02_5521177	Medians_FarmCPU	Depth	1.74e-09	5521176	5521178	Glyma.02G061800	Gm02	5564600	5564836	+	43422						TRUE			turquoise	Root
Gm02_5521177	Medians_FarmCPU	Depth	1.74e-09	5521176	5521178	Glyma.02G061902	Gm02	5565797	5569036	-	44619		AT3G50380		Protein_of_unknown_function_(DUF1162)	vacuolar protein sorting-associated protein, putative (DUF1162);(source:Araport11) protein_coding	TRUE	7	Cortex, Vascular bundle/Xylem pole pericycle, Stele, Endodermis, Epidermis, Xylem, Metaphloem	turquoise	Root
Gm02_5521177	Medians_FarmCPU	Depth	1.74e-09	5521176	5521178	Glyma.02G062000	Gm02	5569203	5570045	-	48025		AT3G50380		Protein_of_unknown_function_(DUF1162)	vacuolar protein sorting-associated protein, putative (DUF1162);(source:Araport11) protein_coding	FALSE			turquoise	Root
Gm02_5521177	Medians_FarmCPU	Depth	1.74e-09	5521176	5521178	Glyma.02G062100	Gm02	5570095	5571141	-	48917		AT3G50380		Protein_of_unknown_function_(DUF1162)	vacuolar protein sorting-associated protein, putative (DUF1162);(source:Araport11) protein_coding	FALSE	7	Cortex, Pericycle, Stele, Endodermis, Epidermis, Xylem, Cluster13	turquoise	Root
Gm02_5521177	Medians_FarmCPU	Depth	1.74e-09	5521176	5521178	Glyma.02G060666	Gm02	5469251	5470882	-	-50295	GO:0005975;GO:0004553	AT1G11820		O-Glycosyl_hydrolases_family_17_protein	O-Glycosyl hydrolases family 17 protein;(source:Araport11) protein_coding	FALSE	0
Gm02_5521177	Medians_FarmCPU	Depth	1.74e-09	5521176	5521178	Glyma.02G060600	Gm02	5465162	5466355	-	-54822		AT5G62410	ATCAP-E1;ATSMC4;SMC2;TTN3	structural_maintenance_of_chromosomes_2	SMC2-1 (SMC2) protein_coding STRUCTURAL MAINTENANCE OF CHROMOSOMES 2 (SMC2) STRUCTURAL MAINTENANCE OF CHROMOSOMES 2 (SMC2); (ATSMC4); (ATCAP-E1);TITAN 3 (TTN3)	FALSE	8	Cortex, Pericycle, Vascular bundle/Xylem pole pericycle, Stele, Endodermis, Epidermis, Xylem, Metaphloem
Gm02_5521177	Medians_FarmCPU	Depth	1.74e-09	5521176	5521178	Glyma.02G062200	Gm02	5577769	5581972	+	56591		AT2G23520		Pyridoxal_phosphate_(PLP)-dependent_transferases_superfamily_protein	Pyridoxal phosphate (PLP)-dependent transferases superfamily protein;(source:Araport11) protein_coding	FALSE	9	Cortex, Pericycle, Vascular bundle/Xylem pole pericycle, Stele, Endodermis, Epidermis, Xylem, Vascular bundle, Metaphloem	blue	Leaf
Gm02_5521177	Medians_FarmCPU	Depth	1.74e-09	5521176	5521178	Glyma.02G060500	Gm02	5447804	5463102	-	-58075	GO:0005515;GO:0034968;GO:0018024;GO:0008270;GO:0005634	AT2G23740		nucleic_acid_binding;sequence-specific_DNA_binding_transcription_factors;zinc_ion_binding	Encodes a SET-domain protein SUVR5 that mediates H3K9me2 deposition and silencing at stimulus response genes in a DNA methylation-independent manner. protein_coding SU(VAR)3-9-RELATED PROTEIN 5 (SUVR5) SU(VAR)3-9-RELATED PROTEIN 5 (SUVR5)	FALSE	10	Cortex, Pericycle, Vascular bundle/Xylem pole pericycle, Stele, Endodermis, Epidermis, Xylem, Vascular bundle, Metaphloem, Cluster13	blue	Leaf
Gm02_5521177	Medians_FarmCPU	Depth	1.74e-09	5521176	5521178	Glyma.02G062251	Gm02	5583293	5584447	+	62115	GO:0031683;GO:0019001;GO:0007186;GO:0004871;GO:0003924	AT2G23460	ATXLG1;XLG1	extra-large_G-protein_1	encodes a novel G-alpha protein that shares similarity to plant, yeast, and animal G-alpha proteins at the C-terminus. It contains an N-terminus that is as large as the C-terminus, is a member of a small family, and is expressed in all tissues examined, including roots, leaves, stems, flowers, and fruits. protein_coding EXTRA-LARGE G-PROTEIN 1 (XLG1) EXTRA-LARGE G-PROTEIN 1 (XLG1); (ATXLG1)	FALSE			blue	Leaf
Gm02_5521177	Medians_FarmCPU	Depth	1.74e-09	5521176	5521178	Glyma.02G062302	Gm02	5585681	5588041	+	64503	GO:0031683;GO:0019001;GO:0007186;GO:0004871;GO:0003924	AT2G23460	ATXLG1;XLG1	extra-large_G-protein_1	encodes a novel G-alpha protein that shares similarity to plant, yeast, and animal G-alpha proteins at the C-terminus. It contains an N-terminus that is as large as the C-terminus, is a member of a small family, and is expressed in all tissues examined, including roots, leaves, stems, flowers, and fruits. protein_coding EXTRA-LARGE G-PROTEIN 1 (XLG1) EXTRA-LARGE G-PROTEIN 1 (XLG1); (ATXLG1)	TRUE	2	Cortex, Pericycle	turquoise	Root
Gm02_37649943	Medians_FarmCPU	Depth	2.2e-10	37649942	37649944	Glyma.02G190600	Gm02	37672336	37677219	+	22392	GO:0005515	AT2G41500	EMB2776;LIS	WD-40_repeat_family_protein_/_small_nuclear_ribonucleoprotein_Prp4p-related	Encodes LACHESIS (LIS), a protein with seven WD40 repeats. LIS is homologous to the yeast splicing factor PRP4 which is associated with the U4/U6 complex of the spliceosome. LIS is involved in a mechanism that prevents accessory cells from adopting gametic cell fate: lis mutant forms supernumerary egg cells. protein_coding LACHESIS (LIS) PROLINE-RICH PROTEIN 4 (PRP4);LACHESIS (LIS); (ATSAP60); (A…	FALSE	10	Cortex, Pericycle, Vascular bundle/Xylem pole pericycle, Stele, Endodermis, Epidermis, Xylem, Vascular bundle, Metaphloem, Cluster13	blue	Leaf
Gm02_37649943	Medians_FarmCPU	Depth	2.2e-10	37649942	37649944	Glyma.02G190201	Gm02	37624725	37626387	-	-23556						FALSE	1	Cortex	red	Meristem
Gm02_37649943	Medians_FarmCPU	Depth	2.2e-10	37649942	37649944	Glyma.02G190700	Gm02	37771521	37776173	-	121577	GO:0016021;GO:0008963	AT2G41490	GPT	UDP-glcnac-adolichol_phosphate_glcnac-1-p-transferase	UDP-GlcNAc:dolichol phosphate N-acetylglucosamine-1-phosphate transferase protein_coding UDP-GLCNAC-ADOLICHOL PHOSPHATE GLCNAC-1-P-TRANSFERASE (GPT) UDP-GLCNAC-ADOLICHOL PHOSPHATE GLCNAC-1-P-TRANSFERASE (GPT)	FALSE	10	Cortex, Pericycle, Vascular bundle/Xylem pole pericycle, Stele, Endodermis, Epidermis, Xylem, Vascular bundle, Metaphloem, Cluster13	blue	Leaf
Gm02_37649943	Medians_FarmCPU	Depth	2.2e-10	37649942	37649944	Glyma.02G190000	Gm02	37510283	37515605	+	-134338	GO:0006629;GO:0004806	AT5G04040	SDP1	Patatin-like_phospholipase_family_protein	Encodes a triacylglycerol lipase that is involved in storage lipid breakdown during seed germination. The mutant plant exhibits a much slower rate of postgerminative growth than the wild type. protein_coding SUGAR-DEPENDENT1 (SDP1) SUGAR-DEPENDENT1 (SDP1)	FALSE	10	Cortex, Pericycle, Vascular bundle/Xylem pole pericycle, Stele, Endodermis, Epidermis, Xylem, Vascular bundle, Metaphloem, Cluster13	turquoise	Root
Gm02_37649943	Medians_FarmCPU	Depth	2.2e-10	37649942	37649944	Glyma.02G189900	Gm02	37506681	37507296	+	-142647						FALSE	3	Cortex, Pericycle, Vascular bundle/Xylem pole pericycle	navajowhite2	Unassigned
Gm02_37649943	Medians_FarmCPU	Depth	2.2e-10	37649942	37649944	Glyma.02G189850	Gm02	37506670	37507273	-	-142670						FALSE	0		grey	Leaf
Gm02_37649943	Medians_FarmCPU	Depth	2.2e-10	37649942	37649944	Glyma.02G189700	Gm02	37492053	37499590	-	-150353		AT2G27040	AGO4;OCP11	Argonaute_family_protein	AGO4 is a member of a class of PAZ/PIWI domain containing proteins involved in siRNA mediated gene silencing.Loss of function mutations have reduced site specific CpNpG and CpHpH methylation, abnormal ovule/megagametophyte develoment and increased susceptibility to bacterial pathogens including Tobacco rattle virus. protein_coding ARGONAUTE 4 (AGO4) OVEREXPRESSOR OF CATIONIC PEROXIDASE 11 (OCP11)…	FALSE	4	Vascular bundle/Xylem pole pericycle, Endodermis, Vascular bundle, Metaphloem	purple	Hypocotyl
Gm02_37649943	Medians_FarmCPU	Depth	2.2e-10	37649942	37649944	Glyma.02G190900	Gm02	37826935	37827758	+	176991		AT5G40690			histone-lysine N-methyltransferase trithorax-like protein;(source:Araport11) protein_coding	TRUE	7	Cortex, Pericycle, Vascular bundle/Xylem pole pericycle, Stele, Endodermis, Epidermis, Cluster13	yellow	Root
Gm02_37649943	Medians_FarmCPU	Depth	2.2e-10	37649942	37649944	Glyma.02G189600	Gm02	37418565	37426605	-	-223338	GO:0008168	AT5G04060		S-adenosyl-L-methionine-dependent_methyltransferases_superfamily_protein	S-adenosyl-L-methionine-dependent methyltransferases superfamily protein;(source:Araport11) protein_coding	FALSE	10	Cortex, Pericycle, Vascular bundle/Xylem pole pericycle, Stele, Endodermis, Epidermis, Xylem, Vascular bundle, Metaphloem, Cluster13	brown	Leaf
Gm02_37649943	Medians_FarmCPU	Depth	2.2e-10	37649942	37649944	Glyma.02G191000	Gm02	37919497	37921151	+	269553	GO:0006468;GO:0005524;GO:0004672;GO:0004674	AT5G26110		Protein_kinase_superfamily_protein	Protein kinase superfamily protein;(source:Araport11) protein_coding	FALSE	0
Gm02_37649943	Medians_FarmCPU	Depth	2.2e-10	37649942	37649944	Glyma.02G191100	Gm02	37938368	37943870	-	288424	GO:0006281;GO:0004518	AT2G41460	ARP	apurinic_endonuclease-redox_protein	Apurinic endonuclease-redox protein. It functions as an apurinic/apyrimidinic class II endonuclease, and is involved in DNA repair. protein_coding APURINIC ENDONUCLEASE-REDOX PROTEIN (ARP) APURINIC ENDONUCLEASE-REDOX PROTEIN (ARP)	FALSE	8	Cortex, Pericycle, Vascular bundle/Xylem pole pericycle, Stele, Endodermis, Epidermis, Xylem, Vascular bundle	blue	Leaf
Gm06_42308843	Medians_FarmCPU	Depth	9.68e-11	42308842	42308844	Glyma.06G252566	Gm06	42312306	42314016	+	3462	GO:0016758;GO:0008152	AT5G17050	UGT78D2	UDP-glucosyl_transferase_78D2	The At5g17050 encodes a anthocyanidin 3-O-glucosyltransferase which specifically glucosylates the 3-position of the flavonoid C-ring. Anthocyanidins such as cyanidin and pelargonidin as well as flavonols such as kaempferol and quercetin are accepted substrates. protein_coding UDP-GLUCOSYL TRANSFERASE 78D2 (UGT78D2) UDP-GLUCOSYL TRANSFERASE 78D2 (UGT78D2)	FALSE	1	Cortex
Gm06_42308843	Medians_FarmCPU	Depth	9.68e-11	42308842	42308844	Glyma.06G252800	Gm06	42338859	42340652	+	30015		AT1G80410	EMB2753	tetratricopeptide_repeat_(TPR)-containing_protein	Encodes the catalytic subunit of a N-terminal acetyltransferase. protein_coding NAA15 (NAA15) MUTANT,SNC1-ENHANCING 6 (MUSE6);OMISHA (OMA);EMBRYO DEFECTIVE 2753 (EMB2753);NAA15 (NAA15)	FALSE			grey	Leaf
Gm06_42308843	Medians_FarmCPU	Depth	9.68e-11	42308842	42308844	Glyma.06G252433	Gm06	42267726	42269781	-	-39062						FALSE			thistle1	Unassigned
Gm06_42308843	Medians_FarmCPU	Depth	9.68e-11	42308842	42308844	Glyma.06G252100	Gm06	42206254	42208458	+	-100385		AT2G20825	ULT2	Developmental_regulator;_ULTRAPETALA	Developmental regulator, ULTRAPETALA;(source:Araport11) protein_coding ULTRAPETALA 2 (ULT2) ULTRAPETALA 2 (ULT2)	FALSE	4	Cortex, Vascular bundle/Xylem pole pericycle, Stele, Xylem	turquoise	Root
Gm06_42308843	Medians_FarmCPU	Depth	9.68e-11	42308842	42308844	Glyma.06G251900	Gm06	42156722	42157984	+	-150859	GO:0016788	AT5G03610		GDSL-like_Lipase/Acylhydrolase_superfamily_protein	GDSL-motif esterase/acyltransferase/lipase. Enzyme group with broad substrate specificity that may catalyze acyltransfer or hydrolase reactions with lipid and non-lipid substrates. protein_coding (GGL25) (GGL25)	FALSE
Gm06_42308843	Medians_FarmCPU	Depth	9.68e-11	42308842	42308844	Glyma.06G253602	Gm06	42549114	42553623	+	240270	GO:0030170					FALSE	8	Cortex, Pericycle, Vascular bundle/Xylem pole pericycle, Stele, Endodermis, Epidermis, Xylem, Metaphloem	brown	Leaf
Gm06_42308843	Medians_FarmCPU	Depth	9.68e-11	42308842	42308844	Glyma.06G253700	Gm06	42564499	42570629	+	255655		AT4G21570		Protein_of_unknown_function_(DUF300)	organic solute transporter ostalpha protein (DUF300);(source:Araport11) protein_coding	FALSE	10	Cortex, Pericycle, Vascular bundle/Xylem pole pericycle, Stele, Endodermis, Epidermis, Xylem, Vascular bundle, Metaphloem, Cluster13	blue	Leaf
Gm06_42308843	Medians_FarmCPU	Depth	9.68e-11	42308842	42308844	Glyma.06G253800	Gm06	42575773	42578100	-	266929						FALSE	10	Cortex, Pericycle, Vascular bundle/Xylem pole pericycle, Stele, Endodermis, Epidermis, Xylem, Vascular bundle, Metaphloem, Cluster13	blue	Leaf
Gm06_42308843	Medians_FarmCPU	Depth	9.68e-11	42308842	42308844	Glyma.06G253900	Gm06	42583508	42586096	-	274664		AT3G13677			hypothetical protein;(source:Araport11) protein_coding	FALSE	10	Cortex, Pericycle, Vascular bundle/Xylem pole pericycle, Stele, Endodermis, Epidermis, Xylem, Vascular bundle, Metaphloem, Cluster13	blue	Leaf
Gm12_12060674	Medians_FarmCPU	Depth	1.78e-09	12060673	12060675	Glyma.12G117900	Gm12	12071214	12074191	+	10539		AT2G20560		DNAJ_heat_shock_family_protein	DNAJ heat shock family protein;(source:Araport11) protein_coding DNAJ PROTEIN (DNAJ) DNAJ PROTEIN (DNAJ)	FALSE	9	Cortex, Pericycle, Vascular bundle/Xylem pole pericycle, Stele, Endodermis, Epidermis, Xylem, Vascular bundle, Metaphloem	brown2	Mixed
Gm12_12060674	Medians_FarmCPU	Depth	1.78e-09	12060673	12060675	Glyma.12G117800	Gm12	12025879	12027241	+	-33433		AT2G20562			Encodes a putative signalling peptide with similarity to TAX1. No known function has been demonstrated yet. protein_coding TAXIMIN 2 (TAX2) TAXIMIN 2 (TAX2)	TRUE	2	Cortex, Pericycle	turquoise	Root
Gm12_12060674	Medians_FarmCPU	Depth	1.78e-09	12060673	12060675	Glyma.12G118200	Gm12	12167307	12169519	+	106632		AT5G59200	OTP80	Tetratricopeptide_repeat_(TPR)-like_superfamily_protein	Encodes a chloroplast RNA editing factor. protein_coding ORGANELLE TRANSCRIPT PROCESSING 80 (OTP80) ORGANELLE TRANSCRIPT PROCESSING 80 (OTP80)	FALSE	6	Cortex, Pericycle, Vascular bundle/Xylem pole pericycle, Stele, Endodermis, Epidermis	brown	Leaf
Gm12_12060674	Medians_FarmCPU	Depth	1.78e-09	12060673	12060675	Glyma.12G118300	Gm12	12173706	12181203	+	113031		AT1G12700		ATP_binding;nucleic_acid_binding;helicases	Encodes RNA PROCESSING FACTOR 1 (RPF1), a pentatricopeptide repeat (PPR) protein of the P-class containing canonical PPR-repeats. RPF1 is required for the 5?-end processing of the nad4 mRNA in mitochondria. Ler and other accessions impaired in processing of the nad4 mRNA 5&#8242;-end, contain a single nucleotide polymorphism (SNP) 807 nucleotides downstream of the predicted translation start codo…	FALSE	9	Cortex, Pericycle, Vascular bundle/Xylem pole pericycle, Stele, Endodermis, Epidermis, Xylem, Vascular bundle, Cluster13	blue	Leaf
Gm12_12060674	Medians_FarmCPU	Depth	1.78e-09	12060673	12060675	Glyma.12G117700	Gm12	11930016	11935252	-	-125422		AT2G20570	ATGLK1;GLK1;GPRI1	GBF\'s_pro-rich_region-interacting_factor_1	Encodes GLK1, Golden2-like 1, one of a pair of partially redundant nuclear transcription factors that regulate chloroplast development in a cell-autonomous manner. GLK2, Golden2-like 2, is encoded by At5g44190. GLK1 and GLK2 regulate the expression of the photosynthetic apparatus. GLK1 is also a member of the GARP transcription factor family. protein_coding GBFS PRO-RICH REGION-INTERACTING FACTOR…	FALSE	7	Cortex, Pericycle, Vascular bundle/Xylem pole pericycle, Stele, Endodermis, Epidermis, Xylem	turquoise	Root
Gm12_12060674	Medians_FarmCPU	Depth	1.78e-09	12060673	12060675	Glyma.12G117600	Gm12	11888823	11896288	-	-164386		AT2G20580	ATRPN1A;RPN1A	26S_proteasome_regulatory_subunit_S2_1A	encoding the RPN subunits of the 26S proteasome The mRNA is cell-to-cell mobile. protein_coding 26S PROTEASOME REGULATORY SUBUNIT S2 1A (RPN1A) 26S PROTEASOME REGULATORY SUBUNIT S2 1A (RPN1A);26S PROTEASOME REGULATORY SUBUNIT S2 1A (ATRPN1A)	FALSE	10	Cortex, Pericycle, Vascular bundle/Xylem pole pericycle, Stele, Endodermis, Epidermis, Xylem, Vascular bundle, Metaphloem, Cluster13	blue	Leaf
Gm12_12060674	Medians_FarmCPU	Depth	1.78e-09	12060673	12060675	Glyma.12G117500	Gm12	11873434	11876321	-	-184353		AT2G33847			hypothetical protein;(source:Araport11) protein_coding	FALSE	8	Cortex, Pericycle, Vascular bundle/Xylem pole pericycle, Stele, Endodermis, Epidermis, Xylem, Metaphloem	blue	Leaf
Gm12_12060674	Medians_FarmCPU	Depth	1.78e-09	12060673	12060675	Glyma.12G117400	Gm12	11867522	11870844	+	-189830	GO:0006508;GO:0004222	AT5G51740		Peptidase_family_M48_family_protein	Mitochondrial ATP-independent protease. Important for maintenance of proper function of the oxphos system. protein_coding (OMA1) (OMA1)	FALSE	10	Cortex, Pericycle, Vascular bundle/Xylem pole pericycle, Stele, Endodermis, Epidermis, Xylem, Vascular bundle, Metaphloem, Cluster13	blue	Leaf
Gm12_12060674	Medians_FarmCPU	Depth	1.78e-09	12060673	12060675	Glyma.12G117300	Gm12	11799041	11801634	+	-259040	GO:0016021	AT2G42770		Peroxisomal_membrane_22_kDa_(Mpv17/PMP22)_family_protein	Peroxisomal membrane 22 kDa (Mpv17/PMP22) family protein;(source:Araport11) protein_coding	FALSE			brown	Leaf
Gm12_12060674	Medians_FarmCPU	Depth	1.78e-09	12060673	12060675	Glyma.12G118600	Gm12	12328212	12332187	+	267537	GO:0006468;GO:0005524;GO:0004672	AT1G28440	HSL1	HAESA-like_1	HAESA-like 1;(source:Araport11) protein_coding HAESA-LIKE 1 (HSL1) HAESA-LIKE 1 (HSL1)	FALSE	10	Cortex, Pericycle, Vascular bundle/Xylem pole pericycle, Stele, Endodermis, Epidermis, Xylem, Vascular bundle, Metaphloem, Cluster13	blue	Leaf
Gm12_12060674	Medians_FarmCPU	Depth	1.78e-09	12060673	12060675	Glyma.12G118700	Gm12	12342091	12345217	+	281416	GO:0006355;GO:0003677	AT4G28500	ANAC073;NAC073;SND2	NAC_domain_containing_protein_73	NAC domain containing protein 73;(source:Araport11) protein_coding NAC DOMAIN CONTAINING PROTEIN 73 (NAC073) NAC DOMAIN CONTAINING PROTEIN 73 (ANAC073);NAC DOMAIN CONTAINING PROTEIN 73 (NAC073);SECONDARY WALL-ASSOCIATED NAC DOMAIN PROTEIN 2 (SND2)	TRUE	10	Cortex, Pericycle, Vascular bundle/Xylem pole pericycle, Stele, Endodermis, Epidermis, Xylem, Vascular bundle, Metaphloem, Cluster13	turquoise	Root
Gm12_12060674	Medians_FarmCPU	Depth	1.78e-09	12060673	12060675	Glyma.12G117102	Gm12	11752175	11770662	+	-290012		AT2G20590		Reticulon_family_protein	Reticulon family protein;(source:Araport11) protein_coding RETICULON 17 (RTN17) RETICULON 17 (RTN17)	TRUE	9	Cortex, Pericycle, Vascular bundle/Xylem pole pericycle, Stele, Endodermis, Epidermis, Xylem, Vascular bundle, Cluster13	turquoise	Root
Gm14_19669054	Medians_FarmCPU	Depth	5.82e-19	19669053	19669055	Glyma.14G135400	Gm14	19694571	19697624	-	25516	GO:0043565;GO:0006355;GO:0003700	AT4G31550	ATWRKY11;WRKY11	WRKY_DNA-binding_protein_11	member of WRKY Transcription Factor; Group II-d; negative regulator of basal resistance to Pseudomonas syringae. protein_coding WRKY DNA-BINDING PROTEIN 11 (WRKY11) (AtWRKY11);WRKY DNA-BINDING PROTEIN 11 (WRKY11)	TRUE	10	Cortex, Pericycle, Vascular bundle/Xylem pole pericycle, Stele, Endodermis, Epidermis, Xylem, Vascular bundle, Metaphloem, Cluster13	turquoise	Root
Gm14_19669054	Medians_FarmCPU	Depth	5.82e-19	19669053	19669055	Glyma.14G135200	Gm14	19641605	19643499	+	-25555						FALSE	8	Cortex, Pericycle, Vascular bundle/Xylem pole pericycle, Stele, Endodermis, Epidermis, Xylem, Metaphloem	grey	Leaf
Gm14_19669054	Medians_FarmCPU	Depth	5.82e-19	19669053	19669055	Glyma.14G135100	Gm14	19588862	19591903	-	-77151	GO:0006887;GO:0000145	AT4G31540	ATEXO70G1;EXO70G1	exocyst_subunit_exo70_family_protein_G1	A member of EXO70 gene family, putative exocyst subunits, conserved in land plants. Arabidopsis thaliana contains 23 putative EXO70 genes, which can be classified into eight clusters on the phylogenetic tree. protein_coding EXOCYST SUBUNIT EXO70 FAMILY PROTEIN G1 (EXO70G1) EXOCYST SUBUNIT EXO70 FAMILY PROTEIN G1 (EXO70G1);EXOCYST SUBUNIT EXO70 FAMILY PROTEIN G1 (ATEXO70G1)	FALSE	9	Cortex, Pericycle, Vascular bundle/Xylem pole pericycle, Stele, Endodermis, Epidermis, Xylem, Metaphloem, Cluster13	brown	Leaf
Gm14_19669054	Medians_FarmCPU	Depth	5.82e-19	19669053	19669055	Glyma.14G135500	Gm14	19775809	19781714	-	106754	GO:0046983	AT3G42170		BED_zinc_finger_;hAT_family_dimerisation_domain	transposase-like gene with conserved domains from the family of hAT transposases that includes hobo from Drosophila melanogaster, Activator (Ac) from maize, and Tam3 from snapdragon but lacks several amino acids known to be essential for Ac transposition5. The DAYSLEEPER gene lacks 8 bp duplications and TIRs (a common feature of transcriptionally silent hAT transposases), however, DAYSLEEPER expr…	FALSE	0		grey	Leaf
Gm14_19669054	Medians_FarmCPU	Depth	5.82e-19	19669053	19669055	Glyma.14G135001	Gm14	19546572	19550649	+	-118405		AT2G27210	BSL3	BRI1_suppressor_1_(BSU1)-like_3	Protein phosphatase which promotes stomatal ACD by establishing kinase-based signalling asymmetry in the two daughter cells. protein_coding BRI1 SUPPRESSOR 1 (BSU1)-LIKE 3 (BSL3) BRI1 SUPPRESSOR 1 (BSU1)-LIKE 3 (BSL3)	FALSE	9	Cortex, Pericycle, Vascular bundle/Xylem pole pericycle, Stele, Endodermis, Epidermis, Xylem, Vascular bundle, Metaphloem	red	Meristem
Gm14_19669054	Medians_FarmCPU	Depth	5.82e-19	19669053	19669055	Glyma.14G134900	Gm14	19532940	19534019	+	-135035		AT5G10695			methionyl-tRNA synthetase;(source:Araport11) protein_coding	FALSE	2	Cortex, Vascular bundle/Xylem pole pericycle	brown2	Mixed
Gm14_19669054	Medians_FarmCPU	Depth	5.82e-19	19669053	19669055	Glyma.14G134800	Gm14	19502629	19511876	-	-157178		AT5G10690		pentatricopeptide_(PPR)_repeat-containing_protein_/_CBS_domain-containing_protein	pentatricopeptide (PPR) repeat-containing protein / CBS domain-containing protein;(source:Araport11) protein_coding	FALSE	9	Cortex, Pericycle, Vascular bundle/Xylem pole pericycle, Stele, Endodermis, Epidermis, Xylem, Vascular bundle, Cluster13	yellow	Root
Gm14_19669054	Medians_FarmCPU	Depth	5.82e-19	19669053	19669055	Glyma.14G134700	Gm14	19477371	19480389	+	-188665	GO:0005516	AT5G39380		Plant_calmodulin-binding_protein-related	Plant calmodulin-binding protein-like protein;(source:Araport11) protein_coding	TRUE	8	Cortex, Pericycle, Vascular bundle/Xylem pole pericycle, Stele, Endodermis, Epidermis, Xylem, Metaphloem	turquoise	Root
Gm14_19669054	Medians_FarmCPU	Depth	5.82e-19	19669053	19669055	Glyma.14G134600	Gm14	19457280	19463149	-	-205905	GO:0008270;GO:0005515	AT5G24870		RING/U-box_superfamily_protein	Ubiquitin E3 ligase, works with WDL7 in module which regulates microtubule disassembly to mediate stomatal closure in response to drought stress and ABA treatment. MREL57 interacts with, ubiquitinates and degrades WDL7, effect is enhanced by ABA. protein_coding (CTL07) (MREL57); (CTL07)	TRUE	10	Cortex, Pericycle, Vascular bundle/Xylem pole pericycle, Stele, Endodermis, Epidermis, Xylem, Vascular bundle, Metaphloem, Cluster13	turquoise	Root
Gm14_19669054	Medians_FarmCPU	Depth	5.82e-19	19669053	19669055	Glyma.14G135900	Gm14	19877279	19890792	+	208224		AT4G31570			nucleoporin;(source:Araport11) protein_coding	FALSE	10	Cortex, Pericycle, Vascular bundle/Xylem pole pericycle, Stele, Endodermis, Epidermis, Xylem, Vascular bundle, Metaphloem, Cluster13	blue	Leaf
Gm14_19669054	Medians_FarmCPU	Depth	5.82e-19	19669053	19669055	Glyma.14G134500	Gm14	19451824	19454356	+	-214698	GO:0070461	AT2G24530			Member of SAGA complex, SPT modulu subunit, interacts with HAG1. protein_coding (ADA1E) (ADA1E)	FALSE	8	Cortex, Pericycle, Vascular bundle/Xylem pole pericycle, Stele, Endodermis, Epidermis, Xylem, Metaphloem	blue	Leaf
Gm18_17125731	Medians_FarmCPU	Depth	1.53e-10	17125730	17125732	Glyma.18G127801	Gm18	17149367	17150251	-	23635	GO:0007165;GO:0005515	AT4G12010		Disease_resistance_protein_(TIR-NBS-LRR_class)_family	Leucine-rich repeat domain (NLR) receptor. Dominant negative alleles suppress catma3 autoimmunity. Co-regulates with WRKY19 basal levels of immunity to root-knot nematodes. protein_coding DOMINANT SUPRESSOR OF CAMTA3 NUMBER 1 (DSC1) DOMINANT SUPRESSOR OF CAMTA3 NUMBER 1 (DSC1)	FALSE	0		palevioletred3	Unassigned
Gm18_17125731	Medians_FarmCPU	Depth	1.53e-10	17125730	17125732	Glyma.18G127900	Gm18	17151366	17153560	+	25634	GO:0007165;GO:0005515	AT4G16990	RLM3	disease_resistance_protein_(TIR-NBS_class);_putative	disease resistance protein (TIR-NBS class);(source:Araport11) protein_coding RESISTANCE TO LEPTOSPHAERIA MACULANS 3 (RLM3) TIR-NBS16 (TN16);RESISTANCE TO LEPTOSPHAERIA MACULANS 3 (RLM3)	TRUE	6	Cortex, Vascular bundle/Xylem pole pericycle, Stele, Endodermis, Epidermis, Metaphloem	yellow	Root
Gm18_17125731	Medians_FarmCPU	Depth	1.53e-10	17125730	17125732	Glyma.18G128000	Gm18	17155604	17158319	+	29872	GO:0007165;GO:0005515	AT5G36930		Disease_resistance_protein_(TIR-NBS-LRR_class)_family	Disease resistance protein (TIR-NBS-LRR class) family;(source:Araport11) protein_coding	TRUE	10	Cortex, Pericycle, Vascular bundle/Xylem pole pericycle, Stele, Endodermis, Epidermis, Xylem, Vascular bundle, Metaphloem, Cluster13	turquoise	Root
Gm18_17125731	Medians_FarmCPU	Depth	1.53e-10	17125730	17125732	Glyma.18G127700	Gm18	17091595	17092809	+	-32922		AT4G24760		alpha/beta-Hydrolases_superfamily_protein	alpha/beta-Hydrolases superfamily protein;(source:Araport11) protein_coding	FALSE			brown	Leaf
Gm18_17125731	Medians_FarmCPU	Depth	1.53e-10	17125730	17125732	Glyma.18G128200	Gm18	17182077	17185179	-	56345		AT1G59710		Protein_of_unknown_function_(DUF569)	actin cross-linking protein (DUF569);(source:Araport11) protein_coding	FALSE	9	Cortex, Pericycle, Vascular bundle/Xylem pole pericycle, Stele, Endodermis, Epidermis, Xylem, Vascular bundle, Metaphloem	blue	Leaf
Gm18_17125731	Medians_FarmCPU	Depth	1.53e-10	17125730	17125732	Glyma.18G127500	Gm18	17034705	17037347	-	-88384		AT1G10350		DNAJ_heat_shock_family_protein	DNAJ heat shock family protein;(source:Araport11) protein_coding	TRUE	10	Cortex, Pericycle, Vascular bundle/Xylem pole pericycle, Stele, Endodermis, Epidermis, Xylem, Vascular bundle, Metaphloem, Cluster13	turquoise	Root
Gm18_17125731	Medians_FarmCPU	Depth	1.53e-10	17125730	17125732	Glyma.18G127400	Gm18	17031677	17033400	+	-92331	GO:0045454;GO:0015035;GO:0006662	AT5G39950	ATH2;ATTRX2;ATTRXH2;TRX2;TRXH2	thioredoxin_2	encodes a cytosolic thioredoxin that reduces disulfide bridges of target proteins by the reversible formation of a disulfide bridge between two neighboring Cys residues present in the active site. Thioredoxins have been found to regulate a variety of biological reactions in prokaryotic and eukaryotic cells. protein_coding THIOREDOXIN 2 (TRX2) THIOREDOXIN 2 (TRX2);ARABIDOPSIS THIOREDOXIN H2 (ATH2)…	FALSE	8	Cortex, Pericycle, Vascular bundle/Xylem pole pericycle, Stele, Epidermis, Xylem, Vascular bundle, Metaphloem	turquoise	Root
Gm18_17125731	Medians_FarmCPU	Depth	1.53e-10	17125730	17125732	Glyma.18G128300	Gm18	17224649	17228908	-	98917		AT4G20720		dentin_sialophosphoprotein-related	dentin sialophosphoprotein-like protein;(source:Araport11) protein_coding	FALSE	10	Cortex, Pericycle, Vascular bundle/Xylem pole pericycle, Stele, Endodermis, Epidermis, Xylem, Vascular bundle, Metaphloem, Cluster13	blue	Leaf
Gm18_17125731	Medians_FarmCPU	Depth	1.53e-10	17125730	17125732	Glyma.18G128400	Gm18	17229624	17239296	-	103892	GO:0005515	AT1G10370	ATGSTU17;ERD9;GST30;GST30B	Glutathione_S-transferase_family_protein	Encodes GSTU17 (Glutathione S-Transferase U17). Functions as a negative component of stress-mediated signal transduction pathways in drought and salt stress responses. protein_coding EARLY-RESPONSIVE TO DEHYDRATION 9 (ERD9) GLUTATHIONE S-TRANSFERASE 30 (GST30);GLUTATHIONE S-TRANSFERASE TAU 17 (ATGSTU17);GLUTATHIONE S-TRANSFERASE U17 (GSTU17);EARLY-RESPONSIVE TO DEHYDRATION 9 (ERD9);GLUTATHIONE S-…	FALSE	3	Cortex, Vascular bundle/Xylem pole pericycle, Metaphloem	grey	Leaf
Gm18_17125731	Medians_FarmCPU	Depth	1.53e-10	17125730	17125732	Glyma.18G128466	Gm18	17241905	17243432	-	116173		AT1G05670		Pentatricopeptide_repeat_(PPR-like)_superfamily_protein	Pentatricopeptide repeat (PPR-like) superfamily protein;(source:Araport11) protein_coding	FALSE	8	Cortex, Pericycle, Vascular bundle/Xylem pole pericycle, Stele, Endodermis, Epidermis, Xylem, Metaphloem	grey	Leaf
Gm18_17125731	Medians_FarmCPU	Depth	1.53e-10	17125730	17125732	Glyma.18G128532	Gm18	17243433	17245027	-	117701		AT1G05670		Pentatricopeptide_repeat_(PPR-like)_superfamily_protein	Pentatricopeptide repeat (PPR-like) superfamily protein;(source:Araport11) protein_coding	FALSE	7	Cortex, Pericycle, Vascular bundle/Xylem pole pericycle, Stele, Endodermis, Epidermis, Xylem	grey	Leaf
Gm18_17125731	Medians_FarmCPU	Depth	1.53e-10	17125730	17125732	Glyma.18G127333	Gm18	16989357	16999482	+	-126249	GO:0019239;GO:0032264;GO:0003876	AT2G38280	ATAMPD;FAC1	AMP_deaminase;_putative_/_myoadenylate_deaminase;_putative	Encodes a protein with in vitro AMP deaminase activity that is involved in embryogenesis. Homozygous mutant embryos fail to develop past the zygote stage. protein_coding EMBRYONIC FACTOR1 (FAC1) ADENOSINE 5-MONOPHOSPHATE DEAMINASE (ATAMPD);EMBRYONIC FACTOR1 (FAC1)	TRUE	10	Cortex, Pericycle, Vascular bundle/Xylem pole pericycle, Stele, Endodermis, Epidermis, Xylem, Vascular bundle, Metaphloem, Cluster13	turquoise	Root
Gm18_17125731	Medians_FarmCPU	Depth	1.53e-10	17125730	17125732	Glyma.18G127267	Gm18	16986182	16989356	+	-136375	GO:0032264;GO:0003876	AT2G38280	ATAMPD;FAC1	AMP_deaminase;_putative_/_myoadenylate_deaminase;_putative	Encodes a protein with in vitro AMP deaminase activity that is involved in embryogenesis. Homozygous mutant embryos fail to develop past the zygote stage. protein_coding EMBRYONIC FACTOR1 (FAC1) ADENOSINE 5-MONOPHOSPHATE DEAMINASE (ATAMPD);EMBRYONIC FACTOR1 (FAC1)	FALSE	10	Cortex, Pericycle, Vascular bundle/Xylem pole pericycle, Stele, Endodermis, Epidermis, Xylem, Vascular bundle, Metaphloem, Cluster13	blue	Leaf
Gm18_17125731	Medians_FarmCPU	Depth	1.53e-10	17125730	17125732	Glyma.18G128600	Gm18	17273543	17277772	-	147811	GO:0016020;GO:0008378;GO:0006486;GO:0030246	AT5G62620		Galactosyltransferase_family_protein	Encodes a Golgi-localized hydroxyproline-O-galactosyltransferase. Mutants display multiple phenotypes including reduced seed coat mucilage and accelerated leaf senescence. protein_coding (GALT6) (GALT6)	FALSE	10	Cortex, Pericycle, Vascular bundle/Xylem pole pericycle, Stele, Endodermis, Epidermis, Xylem, Vascular bundle, Metaphloem, Cluster13	pink	Leaf
Gm18_17125731	Medians_FarmCPU	Depth	1.53e-10	17125730	17125732	Glyma.18G128950	Gm18	17294907	17296341	-	169175		AT1G10410		Protein_of_unknown_function_(DUF1336)	CW14 protein (DUF1336);(source:Araport11) protein_coding	FALSE			grey	Leaf
Gm18_17125731	Medians_FarmCPU	Depth	1.53e-10	17125730	17125732	Glyma.18G129200	Gm18	17350659	17410082	+	224927	GO:0016021;GO:0015914;GO:0005524;GO:0004012;GO:0000287	AT1G59820	ALA3	aminophospholipid_ATPase_3	Encodes a phospholipid translocase. Involved in secretory vesicle formation from trans-Golgi in peripheral columella cells at the root tip. Mutants have short primary roots and grow slower. The mRNA is cell-to-cell mobile. protein_coding AMINOPHOSPHOLIPID ATPASE 3 (ALA3) AMINOPHOSPHOLIPID ATPASE 3 (ALA3)	FALSE	10	Cortex, Pericycle, Vascular bundle/Xylem pole pericycle, Stele, Endodermis, Epidermis, Xylem, Vascular bundle, Metaphloem, Cluster13	blue	Leaf
Gm18_17125731	Medians_FarmCPU	Depth	1.53e-10	17125730	17125732	Glyma.18G129000	Gm18	17355549	17357209	+	229817						FALSE			darkturquoise	Unassigned
Gm18_17125731	Medians_FarmCPU	Depth	1.53e-10	17125730	17125732	Glyma.18G127200	Gm18	16835789	16841994	+	-283737	GO:0016020;GO:0006810;GO:0005215	AT1G69870	NRT1.7	nitrate_transporter_1.7	Encodes a low affinity nitrate transporter NRT1.7. Expressed in phloem. Responsible for source-to-sink remobilization of nitrate. The mRNA is cell-to-cell mobile. protein_coding NRT1/ PTR FAMILY 2.13 (NPF2.13) NITRATE TRANSPORTER 1.7 (NRT1.7); (ATNPF2.13);NRT1/ PTR FAMILY 2.13 (NPF2.13)	FALSE	0		brown	Leaf
Gm01_14659420	Medians_FarmCPU	lr_length	1.85e-11	14659419	14659421	Glyma.01G074600	Gm01	14361998	14363654	+	-295766	GO:0016758;GO:0008152	AT4G01070	GT72B1;UGT72B1	UDP-Glycosyltransferase_superfamily_protein	the glycosyltransferase (UGT72B1) is involved in metabolizing xenobiotica (chloroaniline and chlorophenole). Comparison between wild type and knock-out mutant demonstrates the central role of this gene for metabolizing chloroaniline but significantly less for chlorophenole. The glucosyltransferase preferred UDP-xylose over UDP-glucose indicating its (additional) functioning as a xylosyltransferas…	TRUE	9	Cortex, Pericycle, Vascular bundle/Xylem pole pericycle, Stele, Endodermis, Epidermis, Xylem, Vascular bundle, Cluster13	turquoise	Root
Gm01_16605694	Medians_FarmCPU	lr_length	4.08e-09	16605693	16605695	Glyma.01G074700	Gm01	16650871	16678550	+	45176	GO:0017056;GO:0005643	AT1G10390		Nucleoporin_autopeptidase	DRA2 is a homolog of mammalian nucleoporin 98 and a likely component of the nuclear pore complex in Arabidopsis. It positively participates in the control of the hypocotyl elongation response to plant proximity and control of shade induced gene expression. Nucleoportin which redundantly inhibits flowering together with Nup98b through multiple pathways including clock, photoperiod, and age pathway…	FALSE	10	Cortex, Pericycle, Vascular bundle/Xylem pole pericycle, Stele, Endodermis, Epidermis, Xylem, Vascular bundle, Metaphloem, Cluster13	greenyellow	Leaf
Gm01_16605694	Medians_FarmCPU	lr_length	4.08e-09	16605693	16605695	Glyma.01G074800	Gm01	16686273	16690111	-	80578		AT4G25170		Uncharacterised_conserved_protein_(UCP012943)	Uncharacterized conserved protein (UCP012943);(source:Araport11) protein_coding	FALSE	9	Cortex, Pericycle, Vascular bundle/Xylem pole pericycle, Stele, Endodermis, Epidermis, Xylem, Vascular bundle, Metaphloem	brown	Leaf
Gm05_7256807	Medians_FarmCPU	lr_length	3.81e-16	7256806	7256808	Glyma.05G069000	Gm05	7260830	7263675	+	4022		AT3G29230		Tetratricopeptide_repeat_(TPR)-like_superfamily_protein	Tetratricopeptide repeat (TPR)-like superfamily protein;(source:Araport11) protein_coding	FALSE	8	Cortex, Pericycle, Vascular bundle/Xylem pole pericycle, Stele, Endodermis, Epidermis, Xylem, Metaphloem	brown	Leaf
Gm05_7256807	Medians_FarmCPU	lr_length	3.81e-16	7256806	7256808	Glyma.05G069100	Gm05	7264028	7266359	-	7220		AT4G17030	AT-EXPR;ATEXLB1;ATEXPR1;ATHEXP_BETA_3.1;EXLB1;EXPR	expansin-like_B1	Encodes EXLB1 (expansin-like B1), a member of the expansin family. protein_coding EXPANSIN-LIKE B1 (EXLB1) EXPANSIN-LIKE B1 (ATEXLB1); (EXPR);EXPANSIN-LIKE B1 (EXLB1); (ATEXPR1); (ATHEXP BETA 3.1); (AT-EXPR)	FALSE	2	Cortex, Pericycle	turquoise	Root
Gm05_7256807	Medians_FarmCPU	lr_length	3.81e-16	7256806	7256808	Glyma.05G068900	Gm05	7243404	7248742	+	-8065	GO:0005525	AT2G44610	ATRAB6A;ATRABH1B;RAB6;RAB6A	Ras-related_small_GTP-binding_family_protein	Golgi-localized small GTPase, participates in the trafficking of CESA6 to the plasma membrane, maintaining Golgi organization and morphology, possible role in exocytosis. Plays and important role in hypocotyl growth by influencing cell elongation/growth and deposition of cellulose microfibrils in the cell wall. Plays an important role in cellulose synthesis. Influences both the distribution and v…	TRUE	10	Cortex, Pericycle, Vascular bundle/Xylem pole pericycle, Stele, Endodermis, Epidermis, Xylem, Vascular bundle, Metaphloem, Cluster13	turquoise	Root
Gm05_7256807	Medians_FarmCPU	lr_length	3.81e-16	7256806	7256808	Glyma.05G068800	Gm05	7239289	7240255	+	-16552	GO:0004857	AT5G38610		Plant_invertase/pectin_methylesterase_inhibitor_superfamily_protein	Plant invertase/pectin methylesterase inhibitor superfamily protein;(source:Araport11) protein_coding	FALSE	0		pink	Leaf
Gm05_7256807	Medians_FarmCPU	lr_length	3.81e-16	7256806	7256808	Glyma.05G069150	Gm05	7274761	7277887	-	17953	GO:0005525;GO:0003924	AT1G14830	ADL1C;ADL5;DL1C;DRP1C	DYNAMIN-like_1C	Encodes a dynamin-like protein that is involved in mitochondrial morphogenesis and pollen development. Protein is localized as speckles in the cytoplasm, partially co-localizes with mitochondrial markers, cell plate of dividing cells, and the tip of root hairs, root cap cells, and expanding part of trichoblasts. protein_coding DYNAMIN-LIKE 1C (DL1C) DYNAMIN-LIKE 1C (ADL1C);DYNAMIN-LIKE 1C (DL1C);…	FALSE	8	Cortex, Pericycle, Vascular bundle/Xylem pole pericycle, Stele, Endodermis, Epidermis, Vascular bundle, Cluster13	brown	Leaf
Gm05_7256807	Medians_FarmCPU	lr_length	3.81e-16	7256806	7256808	Glyma.05G068750	Gm05	7211949	7212137	-	-44670						FALSE			lightsteelblue1	Unassigned
Gm05_7256807	Medians_FarmCPU	lr_length	3.81e-16	7256806	7256808	Glyma.05G068700	Gm05	7203310	7204801	+	-52006	GO:0004857	AT5G46940		Plant_invertase/pectin_methylesterase_inhibitor_superfamily_protein	pectin methylesterase inhibitor protein_coding	FALSE	0		turquoise	Root
Gm05_7256807	Medians_FarmCPU	lr_length	3.81e-16	7256806	7256808	Glyma.05G069200	Gm05	7309249	7314256	-	52441		AT5G05800			Myb/SANT-like DNA-binding domain protein;(source:Araport11) protein_coding	FALSE			blue	Leaf
Gm05_7256807	Medians_FarmCPU	lr_length	3.81e-16	7256806	7256808	Glyma.05G068600	Gm05	7187819	7198820	+	-57987	GO:0006508;GO:0004176;GO:0005524;GO:0030163;GO:0004252	AT5G47040	LON2	lon_protease_2	Encodes a member of the Lon protease-like proteins (Lon1/At5g26860, Lon2/At5g47040, Lon3/At3g05780, Lon4/At3g05790). Lon is a multifunctional ATP-dependent protease which exists in bacteria, archaea and within organelles in eukaryotic cells. Lon proteases are responsible for the degradation of abnormal, damaged and unstable proteins. protein_coding LON PROTEASE 2 (LON2) LON PROTEASE 2 (LON2);ABER…	FALSE	10	Cortex, Pericycle, Vascular bundle/Xylem pole pericycle, Stele, Endodermis, Epidermis, Xylem, Vascular bundle, Metaphloem, Cluster13	turquoise	Root
Gm05_7256807	Medians_FarmCPU	lr_length	3.81e-16	7256806	7256808	Glyma.05G069400	Gm05	7322916	7325278	-	66108	GO:0016021;GO:0005215	AT4G18210	ATPUP10;PUP10	purine_permease_10	Member of a family of proteins related to PUP1, a purine transporter. May be involved in the transport of purine and purine derivatives such as cytokinins, across the plasma membrane. The mRNA is cell-to-cell mobile. protein_coding PURINE PERMEASE 10 (PUP10) PURINE PERMEASE 10 (PUP10);PURINE PERMEASE 10 (ATPUP10)	FALSE	0		lightsteelblue1	Unassigned
Gm05_7256807	Medians_FarmCPU	lr_length	3.81e-16	7256806	7256808	Glyma.05G068500	Gm05	7158439	7160200	+	-96607		AT5G47060		Protein_of_unknown_function_(DUF581)	hypothetical protein (DUF581);(source:Araport11) protein_coding	FALSE	10	Cortex, Pericycle, Vascular bundle/Xylem pole pericycle, Stele, Endodermis, Epidermis, Xylem, Vascular bundle, Metaphloem, Cluster13	blue	Leaf
Gm05_7256807	Medians_FarmCPU	lr_length	3.81e-16	7256806	7256808	Glyma.05G069466	Gm05	7356195	7358840	-	99387		AT3G19760	EIF4A-III	eukaryotic_initiation_factor_4A-III	Encodes an RNA helicase that may be a component of the Exon Junction Complex. Subcellular localization is modulated by stress. Under normal conditions it is localized to the nuceloplasm but under hyopoxic conditions it localizes to the nucleolus and splicing speckles. protein_coding EUKARYOTIC INITIATION FACTOR 4A-III (EIF4A-III) EUKARYOTIC INITIATION FACTOR 4A-III (EIF4A-III); (RH2)	FALSE	1	Vascular bundle/Xylem pole pericycle	cyan	Unassigned
Gm05_7256807	Medians_FarmCPU	lr_length	3.81e-16	7256806	7256808	Glyma.05G069532	Gm05	7358897	7363020	-	102089		AT4G12110	ATSMO1;ATSMO1-1;SMO1-1	sterol-4alpha-methyl_oxidase_1-1	Encodes a member of the SMO1 family of sterol 4alpha-methyl oxidases. More specifically functions as a 4,4-dimethyl-9beta,19-cyclopropylsterol-4alpha-methyl oxidase. Works together with SMO1-2 to maintain correct sterol composition and balance auxin and cytokinin activities during embryogenesis. protein_coding STEROL-4ALPHA-METHYL OXIDASE 1-1 (SMO1-1) STEROL-4ALPHA-METHYL OXIDASE 1-1 (SMO1-1); (A…	FALSE	0		ivory	Unassigned
Gm05_7256807	Medians_FarmCPU	lr_length	3.81e-16	7256806	7256808	Glyma.05G069600	Gm05	7363081	7365540	-	106273						FALSE	0
Gm05_7256807	Medians_FarmCPU	lr_length	3.81e-16	7256806	7256808	Glyma.05G069701	Gm05	7366073	7367575	-	109265	GO:0016021;GO:0005215	AT4G18210	ATPUP10;PUP10	purine_permease_10	Member of a family of proteins related to PUP1, a purine transporter. May be involved in the transport of purine and purine derivatives such as cytokinins, across the plasma membrane. The mRNA is cell-to-cell mobile. protein_coding PURINE PERMEASE 10 (PUP10) PURINE PERMEASE 10 (PUP10);PURINE PERMEASE 10 (ATPUP10)	FALSE	0		lavenderblush2	Unassigned
Gm05_7256807	Medians_FarmCPU	lr_length	3.81e-16	7256806	7256808	Glyma.05G069800	Gm05	7387824	7388303	-	131016		AT4G02360		Protein_of_unknown_function;_DUF538	transmembrane protein, putative (Protein of unknown function, DUF538);(source:Araport11) protein_coding	FALSE			lightpink4	Unassigned
Gm05_7256807	Medians_FarmCPU	lr_length	3.81e-16	7256806	7256808	Glyma.05G068400	Gm05	7099663	7103302	+	-153505		AT1G32740		SBP_(S-ribonuclease_binding_protein)_family_protein	SBP (S-ribonuclease binding protein) family protein;(source:Araport11) protein_coding	TRUE	10	Cortex, Pericycle, Vascular bundle/Xylem pole pericycle, Stele, Endodermis, Epidermis, Xylem, Vascular bundle, Metaphloem, Cluster13	yellow	Root
Gm05_7256807	Medians_FarmCPU	lr_length	3.81e-16	7256806	7256808	Glyma.05G070000	Gm05	7429866	7435130	+	173058	GO:0008168	AT4G18030		S-adenosyl-L-methionine-dependent_methyltransferases_superfamily_protein	S-adenosyl-L-methionine-dependent methyltransferases superfamily protein;(source:Araport11) protein_coding	FALSE	10	Cortex, Pericycle, Vascular bundle/Xylem pole pericycle, Stele, Endodermis, Epidermis, Xylem, Vascular bundle, Metaphloem, Cluster13	black	Hypocotyl
Gm05_7256807	Medians_FarmCPU	lr_length	3.81e-16	7256806	7256808	Glyma.05G070200	Gm05	7468890	7475908	+	212082	GO:0000160	AT4G18020	APRR2;PRR2	CheY-like_two-component_responsive_regulator_family_protein	Encodes pseudo-response regulator 2 (APRR2) that interacts with a calcium sensor (CML9). protein_coding (APRR2) PSEUDO-RESPONSE REGULATOR 2 (PRR2); (APRR2)	FALSE	9	Cortex, Pericycle, Vascular bundle/Xylem pole pericycle, Stele, Endodermis, Epidermis, Xylem, Vascular bundle, Metaphloem	pink	Leaf
Gm05_7256807	Medians_FarmCPU	lr_length	3.81e-16	7256806	7256808	Glyma.05G068200	Gm05	7023559	7028303	+	-228504		AT1G32730			electron carrier/iron ion-binding protein;(source:Araport11) protein_coding	FALSE	10	Cortex, Pericycle, Vascular bundle/Xylem pole pericycle, Stele, Endodermis, Epidermis, Xylem, Vascular bundle, Metaphloem, Cluster13	blue	Leaf
Gm05_24611593	Medians_FarmCPU	lr_length	1.11e-11	24611592	24611594	Glyma.05G095200	Gm05	24531195	24532301	+	-79292						FALSE	0
Gm05_24611593	Medians_FarmCPU	lr_length	1.11e-11	24611592	24611594	Glyma.05G095150	Gm05	24525470	24531156	+	-80437						FALSE
Gm05_24611593	Medians_FarmCPU	lr_length	1.11e-11	24611592	24611594	Glyma.05G095100	Gm05	24524303	24524967	+	-86626						FALSE
Gm05_24611593	Medians_FarmCPU	lr_length	1.11e-11	24611592	24611594	Glyma.05G095000	Gm05	24520248	24522560	+	-89033	GO:0030955;GO:0006096;GO:0004743;GO:0000287	AT3G52990		Pyruvate_kinase_family_protein	Pyruvate kinase family protein;(source:Araport11) protein_coding	FALSE			salmon	Unassigned
Gm05_24611593	Medians_FarmCPU	lr_length	1.11e-11	24611592	24611594	Glyma.05G095400	Gm05	24754575	24755718	-	142981	GO:0008199;GO:0006879;GO:0006826	AT3G11050	ATFER2;FER2	ferritin_2	ferritin 2;(source:Araport11) protein_coding FERRITIN 2 (FER2) FERRITIN 2 (FER2);FERRITIN 2 (ATFER2)	TRUE			turquoise	Root
Gm05_24611593	Medians_FarmCPU	lr_length	1.11e-11	24611592	24611594	Glyma.05G095500	Gm05	24761684	24766178	-	150090		AT1G45207		Remorin_family_protein	Remorin family protein;(source:Araport11) protein_coding	FALSE	4	Cortex, Pericycle, Stele, Epidermis	green	Meristem
Gm05_24611593	Medians_FarmCPU	lr_length	1.11e-11	24611592	24611594	Glyma.05G095600	Gm05	24793069	24795387	-	181475	GO:0009041;GO:0006221	AT3G18680		Amino_acid_kinase_family_protein	Encodes a functional UMP Kinase located in the plastid that binds to group II intron plastid transcription products. Mutants show decreased accumulation of target transcripts/proteins. protein_coding PLASTID 55 UMP KINASE (PUMPKIN) PLASTID 55 UMP KINASE (PUMPKIN)	FALSE	6	Cortex, Pericycle, Vascular bundle/Xylem pole pericycle, Stele, Endodermis, Epidermis	grey	Leaf
Gm05_24611593	Medians_FarmCPU	lr_length	1.11e-11	24611592	24611594	Glyma.05G095633	Gm05	24796700	24796948	-	185106						FALSE			grey	Leaf
Gm05_24611593	Medians_FarmCPU	lr_length	1.11e-11	24611592	24611594	Glyma.05G095666	Gm05	24886208	24887252	-	274614		AT5G67020			hypothetical protein;(source:Araport11) protein_coding	FALSE	2	Cortex, Epidermis	grey	Leaf
Gm05_24611593	Medians_FarmCPU	lr_length	1.11e-11	24611592	24611594	Glyma.05G094900	Gm05	24323983	24325265	+	-286328	GO:0046983	AT5G67060	HEC1	basic_helix-loop-helix_(bHLH)_DNA-binding_superfamily_protein	Encodes a bHLH transcription factor that is involved in transmitting tract and stigma development and acts as a local modulator of auxin and cytokinin responses to control gynoecium development. HEC1 affects auxin transport by acting as a transcriptional regulator of PIN1 and PIN3. Inhibits thermomorphogenesis. protein_coding HECATE 1 (HEC1) HECATE 1 (HEC1)	FALSE	7	Cortex, Pericycle, Vascular bundle/Xylem pole pericycle, Stele, Endodermis, Epidermis, Vascular bundle	green	Meristem
Gm02_15770618	Medians_FarmCPU	pr_tip_depth	1.01e-09	15770617	15770619	Glyma.02G149100	Gm02	15767626	15770830	-	0	GO:0055114;GO:0016491;GO:0016209;GO:0006979;GO:0004602	AT2G48150	ATGPX4;GPX4	glutathione_peroxidase_4	Encodes glutathione peroxidase. protein_coding GLUTATHIONE PEROXIDASE 4 (GPX4) GLUTATHIONE PEROXIDASE 4 (GPX4); (GPXL4);GLUTATHIONE PEROXIDASE 4 (ATGPX4)	TRUE	10	Cortex, Pericycle, Vascular bundle/Xylem pole pericycle, Stele, Endodermis, Epidermis, Xylem, Vascular bundle, Metaphloem, Cluster13	yellow	Root
Gm02_15770618	Medians_FarmCPU	pr_tip_depth	1.01e-09	15770617	15770619	Glyma.02G149200	Gm02	15772389	15784423	-	1770		AT2G48160		Tudor/PWWP/MBT_domain-containing_protein	HUA and HUA-LIKE (HULK) genes act redundantly to regulate a subset of essential genes, with some (or all) family members also having specific functions. protein_coding HUA2 LIKE 2 (HULK2) (SL3);HUA2 LIKE 2 (HULK2)	FALSE	10	Cortex, Pericycle, Vascular bundle/Xylem pole pericycle, Stele, Endodermis, Epidermis, Xylem, Vascular bundle, Metaphloem, Cluster13	blue	Leaf
Gm02_15770618	Medians_FarmCPU	pr_tip_depth	1.01e-09	15770617	15770619	Glyma.02G149000	Gm02	15763584	15764188	-	-6430		AT3G63088	DVL14;RTFL14	ROTUNDIFOLIA_like_14	ROTUNDIFOLIA like 14;(source:Araport11) protein_coding ROTUNDIFOLIA LIKE 14 (RTFL14) ROTUNDIFOLIA LIKE 14 (RTFL14);DEVIL 14 (DVL14)	FALSE	9	Cortex, Pericycle, Vascular bundle/Xylem pole pericycle, Stele, Endodermis, Epidermis, Xylem, Vascular bundle, Metaphloem	grey	Leaf
Gm02_15770618	Medians_FarmCPU	pr_tip_depth	1.01e-09	15770617	15770619	Glyma.02G148900	Gm02	15755724	15760333	+	-10285		AT4G02880			ELKS/Rab6-interacting/CAST family protein;(source:Araport11) protein_coding	TRUE	10	Cortex, Pericycle, Vascular bundle/Xylem pole pericycle, Stele, Endodermis, Epidermis, Xylem, Vascular bundle, Metaphloem, Cluster13	turquoise	Root
Gm02_15770618	Medians_FarmCPU	pr_tip_depth	1.01e-09	15770617	15770619	Glyma.02G149300	Gm02	15785914	15787727	+	15295	GO:0055085;GO:0016021	AT1G16390	3-Oct;ATOCT3	organic_cation/carnitine_transporter_3	organic cation/carnitine transporter 3;(source:Araport11) protein_coding ORGANIC CATION/CARNITINE TRANSPORTER 3 (OCT3) ORGANIC CATION/CARNITINE TRANSPORTER 3 (OCT3);ORGANIC CATION/CARNITINE TRANSPORTER 3 (ATOCT3)	FALSE	2	Pericycle, Vascular bundle	brown	Leaf
Gm02_15770618	Medians_FarmCPU	pr_tip_depth	1.01e-09	15770617	15770619	Glyma.02G148700	Gm02	15752352	15752798	-	-17820		AT3G63095		Tetratricopeptide_repeat_(TPR)-like_superfamily_protein	Encodes a Protease inhibitor/seed storage/LTP family protein protein_coding	FALSE			darkgrey	Unassigned
Gm02_15770618	Medians_FarmCPU	pr_tip_depth	1.01e-09	15770617	15770619	Glyma.02G148600	Gm02	15745796	15747303	+	-23315	GO:0008033	AT3G63110	ATIPT3;IPT3	isopentenyltransferase_3	Encodes cytokinin synthase involved in cytokinin biosynthesis. IPT3 subcellular localization is modulated by farnesylation- when farnesylated it is localized to the nucleus, otherwise to the chloroplast. protein_coding ISOPENTENYLTRANSFERASE 3 (IPT3) ISOPENTENYLTRANSFERASE 3 (ATIPT3);ISOPENTENYLTRANSFERASE 3 (IPT3)	FALSE	5	Pericycle, Vascular bundle/Xylem pole pericycle, Epidermis, Xylem, Metaphloem	grey	Leaf
Gm02_15770618	Medians_FarmCPU	pr_tip_depth	1.01e-09	15770617	15770619	Glyma.02G149402	Gm02	15797470	15803743	-	26851		AT2G48120	PAC	pale_cress_protein_(PAC)	The pale cress (pac) mutant affects chloroplast and leaf development; mutants are ABA-deficient and accumulate lower levels of carotenoids and chlorophyll compared to wild type. PAC binds 23srRNA and appears to be required for 50s ribosome assembly. Three alternative transcripts of this gene exist.PAC is essential for photoautotrophic growth and associates with psbK-psbI, ndhF, ndhD, and 23S ribo…	FALSE	9	Cortex, Pericycle, Vascular bundle/Xylem pole pericycle, Stele, Endodermis, Epidermis, Xylem, Vascular bundle, Metaphloem	brown	Leaf
Gm02_15770618	Medians_FarmCPU	pr_tip_depth	1.01e-09	15770617	15770619	Glyma.02G148500	Gm02	15736858	15739385	+	-31233	GO:0046983	AT5G64980			transcription factor;(source:Araport11) protein_coding	FALSE	3	Cortex, Pericycle, Vascular bundle/Xylem pole pericycle	red	Meristem
Gm02_15770618	Medians_FarmCPU	pr_tip_depth	1.01e-09	15770617	15770619	Glyma.02G149500	Gm02	15803059	15804294	-	32440						FALSE	9	Cortex, Pericycle, Vascular bundle/Xylem pole pericycle, Stele, Endodermis, Epidermis, Xylem, Vascular bundle, Cluster13	brown	Leaf
Gm02_15770618	Medians_FarmCPU	pr_tip_depth	1.01e-09	15770617	15770619	Glyma.02G149600	Gm02	15805257	15809672	-	34638	GO:0005515	AT3G06190	ATBPM2;BPM2	BTB-POZ_and_MATH_domain_2	Encodes a member of the MATH-BTB domain proteins (BPMs) that directly interact with and target for proteasomal degradation the class I homeobox-leucine zipper (HD-ZIP) transcription factor ATHB6. Known members include AT5G19000 (BPM1), AT3G06190 (BPM2), AT2G39760 (BPM3), AT3G03740 (BPM4), AT5G21010 (BPM5) and AT3G43700 (BPM6). protein_coding BTB-POZ AND MATH DOMAIN 2 (BPM2) BTB-POZ AND MATH DOMAI…	TRUE	10	Cortex, Pericycle, Vascular bundle/Xylem pole pericycle, Stele, Endodermis, Epidermis, Xylem, Vascular bundle, Metaphloem, Cluster13	yellow	Root
Gm02_15770618	Medians_FarmCPU	pr_tip_depth	1.01e-09	15770617	15770619	Glyma.02G148400	Gm02	15730059	15732620	-	-37998	GO:0009058;GO:0003824	AT4G02860		Phenazine_biosynthesis_PhzC/PhzF_protein	Phenazine biosynthesis PhzC/PhzF protein;(source:Araport11) protein_coding D-AMINO ACID RACEMASE2 (DAAR2) D-AMINO ACID RACEMASE2 (DAAR2)	TRUE	9	Cortex, Pericycle, Vascular bundle/Xylem pole pericycle, Stele, Endodermis, Epidermis, Xylem, Vascular bundle, Metaphloem	turquoise	Root
Gm02_15770618	Medians_FarmCPU	pr_tip_depth	1.01e-09	15770617	15770619	Glyma.02G148351	Gm02	15728471	15728981	+	-41637		AT5G62130		Per1-like_family_protein	Per1-like family protein;(source:Araport11) protein_coding	FALSE	0
Gm02_15770618	Medians_FarmCPU	pr_tip_depth	1.01e-09	15770617	15770619	Glyma.02G149700	Gm02	15813992	15819259	+	43373		AT4G02920			hypothetical protein;(source:Araport11) protein_coding	FALSE	10	Cortex, Pericycle, Vascular bundle/Xylem pole pericycle, Stele, Endodermis, Epidermis, Xylem, Vascular bundle, Metaphloem, Cluster13	brown	Leaf
Gm02_15770618	Medians_FarmCPU	pr_tip_depth	1.01e-09	15770617	15770619	Glyma.02G148300	Gm02	15721669	15725318	-	-45300	GO:0009058;GO:0003824	AT4G02860		Phenazine_biosynthesis_PhzC/PhzF_protein	Phenazine biosynthesis PhzC/PhzF protein;(source:Araport11) protein_coding D-AMINO ACID RACEMASE2 (DAAR2) D-AMINO ACID RACEMASE2 (DAAR2)	FALSE	3	Cortex, Stele, Endodermis	red	Meristem
Gm02_15770618	Medians_FarmCPU	pr_tip_depth	1.01e-09	15770617	15770619	Glyma.02G149800	Gm02	15817860	15825347	+	47241	GO:0007005;GO:0004842	AT1G63900		E3_Ubiquitin_ligase_family_protein	Encodes a RING-type ubiquitin E3 ligase of the chloroplast outer membrane that associates with TOC complexes and mediates ubiquitination of TOC components, promoting their degradation. It not only regulates chloroplast protein import but also targets components of the peroxisome protein import apparatus, PEX13 in particular. Several studies have been done to examine the peroxisomal localization o…	FALSE	10	Cortex, Pericycle, Vascular bundle/Xylem pole pericycle, Stele, Endodermis, Epidermis, Xylem, Vascular bundle, Metaphloem, Cluster13	blue	Leaf
Gm02_15770618	Medians_FarmCPU	pr_tip_depth	1.01e-09	15770617	15770619	Glyma.02G149850	Gm02	15826419	15828522	+	55800						FALSE	0
Gm02_15770618	Medians_FarmCPU	pr_tip_depth	1.01e-09	15770617	15770619	Glyma.02G148200	Gm02	15712038	15713834	-	-56784	GO:0006508;GO:0004190	AT1G03220		Eukaryotic_aspartyl_protease_family_protein	Eukaryotic aspartyl protease family protein;(source:Araport11) protein_coding SECRETED ASPARTIC PROTEASE 2 (SAP2) SECRETED ASPARTIC PROTEASE 2 (SAP2)	FALSE	9	Cortex, Pericycle, Vascular bundle/Xylem pole pericycle, Stele, Endodermis, Epidermis, Xylem, Vascular bundle, Cluster13	yellow	Root
Gm02_15770618	Medians_FarmCPU	pr_tip_depth	1.01e-09	15770617	15770619	Glyma.02G148100	Gm02	15703593	15707449	-	-63169		AT2G27310		F-box_family_protein	F-box family protein;(source:Araport11) protein_coding	TRUE	7	Cortex, Pericycle, Vascular bundle/Xylem pole pericycle, Stele, Epidermis, Xylem, Vascular bundle	turquoise	Root
Gm02_15770618	Medians_FarmCPU	pr_tip_depth	1.01e-09	15770617	15770619	Glyma.02G148000	Gm02	15702172	15702573	+	-68045		AT3G22060		Receptor-like_protein_kinase-related_family_protein	contains Pfam profile: PF01657 Domain of unknown function that is usually associated with protein kinase domain Pfam:PF00069, however this protein does not have the protein kinase domain protein_coding	TRUE			turquoise	Root
Gm02_25515820	Medians_FarmCPU	pr_tip_depth	1.26e-14	25515819	25515821	Glyma.02G164500	Gm02	25320997	25322431	+	-193389		AT1G63855		Putative_methyltransferase_family_protein	Putative methyltransferase family protein;(source:Araport11) protein_coding	FALSE			grey	Leaf
Gm02_25515820	Medians_FarmCPU	pr_tip_depth	1.26e-14	25515819	25515821	Glyma.02G164400	Gm02	25290978	25293376	-	-222444	GO:0055085;GO:0016021	AT2G39210		Major_facilitator_superfamily_protein	Major facilitator superfamily transmembrane transporter responsible for the uptake of picolinate herbicides. protein_coding PICLORAM RESISTANT30 (PIC30) PICLORAM RESISTANT30 (PIC30)	FALSE	0		turquoise	Root
Gm02_25515820	Medians_FarmCPU	pr_tip_depth	1.26e-14	25515819	25515821	Glyma.02G164700	Gm02	25746967	25777043	+	231146	GO:0005515	AT2G32700	LUH	LEUNIG_homolog	Encodes a WD40 repeat and LUFS domain containing protein that is similar to LUG. Interacts physically with SEUSS and likely functions as part of a repressor complex that represses AG. Involved in cell wall modifications necessary for mucilage extrusion and mediates aluminium sensitivity through PECTIN METHYLESTERASE46-modulated root cell wall pectin methylesterification. protein_coding LEUNIG_HOM…	TRUE	10	Cortex, Pericycle, Vascular bundle/Xylem pole pericycle, Stele, Endodermis, Epidermis, Xylem, Vascular bundle, Metaphloem, Cluster13	turquoise	Root
Gm04_29977360	Medians_FarmCPU	pr_tip_depth	5.52e-09	29977359	29977361	Glyma.04G148900	Gm04	29995566	29999243	+	18205		AT4G17486		PPPDE_putative_thiol_peptidase_family_protein	PPPDE putative thiol peptidase family protein;(source:Araport11) protein_coding	FALSE	0		lightcyan	Unassigned
Gm04_29977360	Medians_FarmCPU	pr_tip_depth	5.52e-09	29977359	29977361	Glyma.04G148800	Gm04	29953608	29957586	+	-19774		AT5G58340		myb-like_HTH_transcriptional_regulator_family_protein	myb-like HTH transcriptional regulator family protein;(source:Araport11) protein_coding	FALSE	9	Cortex, Pericycle, Vascular bundle/Xylem pole pericycle, Stele, Endodermis, Epidermis, Xylem, Vascular bundle, Metaphloem	purple	Hypocotyl
Gm06_42308843	Medians_FarmCPU	pr_tip_depth	9.68e-11	42308842	42308844	Glyma.06G252566	Gm06	42312306	42314016	+	3462	GO:0016758;GO:0008152	AT5G17050	UGT78D2	UDP-glucosyl_transferase_78D2	The At5g17050 encodes a anthocyanidin 3-O-glucosyltransferase which specifically glucosylates the 3-position of the flavonoid C-ring. Anthocyanidins such as cyanidin and pelargonidin as well as flavonols such as kaempferol and quercetin are accepted substrates. protein_coding UDP-GLUCOSYL TRANSFERASE 78D2 (UGT78D2) UDP-GLUCOSYL TRANSFERASE 78D2 (UGT78D2)	FALSE	1	Cortex
Gm06_42308843	Medians_FarmCPU	pr_tip_depth	9.68e-11	42308842	42308844	Glyma.06G252800	Gm06	42338859	42340652	+	30015		AT1G80410	EMB2753	tetratricopeptide_repeat_(TPR)-containing_protein	Encodes the catalytic subunit of a N-terminal acetyltransferase. protein_coding NAA15 (NAA15) MUTANT,SNC1-ENHANCING 6 (MUSE6);OMISHA (OMA);EMBRYO DEFECTIVE 2753 (EMB2753);NAA15 (NAA15)	FALSE			grey	Leaf
Gm06_42308843	Medians_FarmCPU	pr_tip_depth	9.68e-11	42308842	42308844	Glyma.06G252433	Gm06	42267726	42269781	-	-39062						FALSE			thistle1	Unassigned
Gm06_42308843	Medians_FarmCPU	pr_tip_depth	9.68e-11	42308842	42308844	Glyma.06G252100	Gm06	42206254	42208458	+	-100385		AT2G20825	ULT2	Developmental_regulator;_ULTRAPETALA	Developmental regulator, ULTRAPETALA;(source:Araport11) protein_coding ULTRAPETALA 2 (ULT2) ULTRAPETALA 2 (ULT2)	FALSE	4	Cortex, Vascular bundle/Xylem pole pericycle, Stele, Xylem	turquoise	Root
Gm06_42308843	Medians_FarmCPU	pr_tip_depth	9.68e-11	42308842	42308844	Glyma.06G251900	Gm06	42156722	42157984	+	-150859	GO:0016788	AT5G03610		GDSL-like_Lipase/Acylhydrolase_superfamily_protein	GDSL-motif esterase/acyltransferase/lipase. Enzyme group with broad substrate specificity that may catalyze acyltransfer or hydrolase reactions with lipid and non-lipid substrates. protein_coding (GGL25) (GGL25)	FALSE
Gm06_42308843	Medians_FarmCPU	pr_tip_depth	9.68e-11	42308842	42308844	Glyma.06G253602	Gm06	42549114	42553623	+	240270	GO:0030170					FALSE	8	Cortex, Pericycle, Vascular bundle/Xylem pole pericycle, Stele, Endodermis, Epidermis, Xylem, Metaphloem	brown	Leaf
Gm06_42308843	Medians_FarmCPU	pr_tip_depth	9.68e-11	42308842	42308844	Glyma.06G253700	Gm06	42564499	42570629	+	255655		AT4G21570		Protein_of_unknown_function_(DUF300)	organic solute transporter ostalpha protein (DUF300);(source:Araport11) protein_coding	FALSE	10	Cortex, Pericycle, Vascular bundle/Xylem pole pericycle, Stele, Endodermis, Epidermis, Xylem, Vascular bundle, Metaphloem, Cluster13	blue	Leaf
Gm06_42308843	Medians_FarmCPU	pr_tip_depth	9.68e-11	42308842	42308844	Glyma.06G253800	Gm06	42575773	42578100	-	266929						FALSE	10	Cortex, Pericycle, Vascular bundle/Xylem pole pericycle, Stele, Endodermis, Epidermis, Xylem, Vascular bundle, Metaphloem, Cluster13	blue	Leaf
Gm06_42308843	Medians_FarmCPU	pr_tip_depth	9.68e-11	42308842	42308844	Glyma.06G253900	Gm06	42583508	42586096	-	274664		AT3G13677			hypothetical protein;(source:Araport11) protein_coding	FALSE	10	Cortex, Pericycle, Vascular bundle/Xylem pole pericycle, Stele, Endodermis, Epidermis, Xylem, Vascular bundle, Metaphloem, Cluster13	blue	Leaf
Gm07_35512631	Medians_FarmCPU	pr_tip_depth	5.31e-09	35512630	35512632	Glyma.07G184000	Gm07	35507607	35510798	-	-1833	GO:0006468;GO:0005524;GO:0004672;GO:0030246	AT5G10530		Concanavalin_A-like_lectin_protein_kinase_family_protein	Concanavalin A-like lectin protein kinase family protein;(source:Araport11) protein_coding L-TYPE LECTIN RECEPTOR KINASE IX.1 (LECRK-IX.1) L-TYPE LECTIN RECEPTOR KINASE IX.1 (LECRK-IX.1)	TRUE	10	Cortex, Pericycle, Vascular bundle/Xylem pole pericycle, Stele, Endodermis, Epidermis, Xylem, Vascular bundle, Metaphloem, Cluster13	turquoise	Root
Gm07_35512631	Medians_FarmCPU	pr_tip_depth	5.31e-09	35512630	35512632	Glyma.07G183900	Gm07	35502263	35504854	+	-7777	GO:0016020;GO:0006468;GO:0005524;GO:0004672	AT5G10530		Concanavalin_A-like_lectin_protein_kinase_family_protein	Concanavalin A-like lectin protein kinase family protein;(source:Araport11) protein_coding L-TYPE LECTIN RECEPTOR KINASE IX.1 (LECRK-IX.1) L-TYPE LECTIN RECEPTOR KINASE IX.1 (LECRK-IX.1)	FALSE	1	Epidermis	yellow	Root
Gm07_35512631	Medians_FarmCPU	pr_tip_depth	5.31e-09	35512630	35512632	Glyma.07G183700	Gm07	35493005	35495320	-	-17311		AT1G18265		Protein_of_unknown_function;_DUF593	zein-binding protein (Protein of unknown function, DUF593);(source:Araport11) protein_coding	FALSE	9	Cortex, Pericycle, Vascular bundle/Xylem pole pericycle, Stele, Endodermis, Epidermis, Xylem, Vascular bundle, Metaphloem	yellow	Root
Gm07_35512631	Medians_FarmCPU	pr_tip_depth	5.31e-09	35512630	35512632	Glyma.07G184100	Gm07	35532964	35538702	+	20332		AT5G09580			heat shock protein;(source:Araport11) protein_coding	FALSE	9	Cortex, Pericycle, Vascular bundle/Xylem pole pericycle, Stele, Endodermis, Epidermis, Xylem, Vascular bundle, Cluster13	blue	Leaf
Gm07_35512631	Medians_FarmCPU	pr_tip_depth	5.31e-09	35512630	35512632	Glyma.07G183600	Gm07	35484102	35490752	-	-21879	GO:0055114;GO:0016491;GO:0008152	AT2G14170	ALDH6B2	aldehyde_dehydrogenase__6B2	Arabidopsis thaliana methylmalonate-semialdehyde dehydrogenase protein_coding ALDEHYDE DEHYDROGENASE 6B2 (ALDH6B2) (MMSD);ALDEHYDE DEHYDROGENASE 6B2 (ALDH6B2)	TRUE	10	Cortex, Pericycle, Vascular bundle/Xylem pole pericycle, Stele, Endodermis, Epidermis, Xylem, Vascular bundle, Metaphloem, Cluster13	turquoise	Root
Gm07_35512631	Medians_FarmCPU	pr_tip_depth	5.31e-09	35512630	35512632	Glyma.07G184200	Gm07	35536867	35542957	-	24235	GO:0055085	AT5G64410	ATOPT4;OPT4	oligopeptide_transporter_4	oligopeptide transporter protein_coding OLIGOPEPTIDE TRANSPORTER 4 (OPT4) ARABIDOPSIS THALIANA OLIGOPEPTIDE TRANSPORTER 4 (ATOPT4);OLIGOPEPTIDE TRANSPORTER 4 (OPT4)	FALSE	2	Cortex, Vascular bundle	turquoise	Root
Gm07_35512631	Medians_FarmCPU	pr_tip_depth	5.31e-09	35512630	35512632	Glyma.07G184300	Gm07	35545362	35548927	+	32730		AT5G09590	HSC70-5;MTHSC70-2	mitochondrial_HSO70_2	heat shock protein 70 (Hsc70-5); nuclear protein_coding MITOCHONDRIAL HSO70 2 (MTHSC70-2) MITOCHONDRIAL HSO70 2 (MTHSC70-2);HEAT SHOCK COGNATE (HSC70-5)	FALSE	9	Cortex, Pericycle, Vascular bundle/Xylem pole pericycle, Stele, Endodermis, Epidermis, Xylem, Vascular bundle, Metaphloem	blue	Leaf
Gm07_35512631	Medians_FarmCPU	pr_tip_depth	5.31e-09	35512630	35512632	Glyma.07G183400	Gm07	35472709	35474493	+	-38138	GO:0016758;GO:0008152	AT5G17050	UGT78D2	UDP-glucosyl_transferase_78D2	The At5g17050 encodes a anthocyanidin 3-O-glucosyltransferase which specifically glucosylates the 3-position of the flavonoid C-ring. Anthocyanidins such as cyanidin and pelargonidin as well as flavonols such as kaempferol and quercetin are accepted substrates. protein_coding UDP-GLUCOSYL TRANSFERASE 78D2 (UGT78D2) UDP-GLUCOSYL TRANSFERASE 78D2 (UGT78D2)	FALSE	0		brown4	Unassigned
Gm07_35512631	Medians_FarmCPU	pr_tip_depth	5.31e-09	35512630	35512632	Glyma.07G183300	Gm07	35469010	35471138	+	-41493	GO:0016758;GO:0008152	AT5G17050	UGT78D2	UDP-glucosyl_transferase_78D2	The At5g17050 encodes a anthocyanidin 3-O-glucosyltransferase which specifically glucosylates the 3-position of the flavonoid C-ring. Anthocyanidins such as cyanidin and pelargonidin as well as flavonols such as kaempferol and quercetin are accepted substrates. protein_coding UDP-GLUCOSYL TRANSFERASE 78D2 (UGT78D2) UDP-GLUCOSYL TRANSFERASE 78D2 (UGT78D2)	FALSE	1	Pericycle	mediumpurple3	Leaf
Gm07_35512631	Medians_FarmCPU	pr_tip_depth	5.31e-09	35512630	35512632	Glyma.07G184400	Gm07	35559015	35560640	-	46383	GO:0005515	AT5G64430		Octicosapeptide/Phox/Bem1p_family_protein	Octicosapeptide/Phox/Bem1p family protein;(source:Araport11) protein_coding	FALSE	10	Cortex, Pericycle, Vascular bundle/Xylem pole pericycle, Stele, Endodermis, Epidermis, Xylem, Vascular bundle, Metaphloem, Cluster13	turquoise	Root
Gm07_35512631	Medians_FarmCPU	pr_tip_depth	5.31e-09	35512630	35512632	Glyma.07G184500	Gm07	35564439	35569168	-	51807		AT5G64460		Phosphoglycerate_mutase_family_protein	Phosphoglycerate mutase family protein;(source:Araport11) protein_coding	FALSE	10	Cortex, Pericycle, Vascular bundle/Xylem pole pericycle, Stele, Endodermis, Epidermis, Xylem, Vascular bundle, Metaphloem, Cluster13	blue	Leaf
Gm07_35512631	Medians_FarmCPU	pr_tip_depth	5.31e-09	35512630	35512632	Glyma.07G183200	Gm07	35456247	35457934	+	-54697	GO:0016758;GO:0008152	AT5G17050	UGT78D2	UDP-glucosyl_transferase_78D2	The At5g17050 encodes a anthocyanidin 3-O-glucosyltransferase which specifically glucosylates the 3-position of the flavonoid C-ring. Anthocyanidins such as cyanidin and pelargonidin as well as flavonols such as kaempferol and quercetin are accepted substrates. protein_coding UDP-GLUCOSYL TRANSFERASE 78D2 (UGT78D2) UDP-GLUCOSYL TRANSFERASE 78D2 (UGT78D2)	FALSE	4	Cortex, Vascular bundle/Xylem pole pericycle, Stele, Endodermis	turquoise	Root
Gm07_35512631	Medians_FarmCPU	pr_tip_depth	5.31e-09	35512630	35512632	Glyma.07G184600	Gm07	35569994	35573707	+	57362		AT5G64470	TBL12	Plant_protein_of_unknown_function_(DUF828)	Encodes a member of the TBL (TRICHOME BIREFRINGENCE-LIKE) gene family containing a plant-specific DUF231 (domain of unknown function) domain. TBL gene family has 46 members, two of which (TBR/AT5G06700 and TBL3/AT5G01360) have been shown to be involved in the synthesis and deposition of secondary wall cellulose, presumably by influencing the esterification state of pectic polymers. A nomenclature…	FALSE	10	Cortex, Pericycle, Vascular bundle/Xylem pole pericycle, Stele, Endodermis, Epidermis, Xylem, Vascular bundle, Metaphloem, Cluster13	brown	Leaf
Gm07_35512631	Medians_FarmCPU	pr_tip_depth	5.31e-09	35512630	35512632	Glyma.07G184700	Gm07	35576357	35578840	-	63725	GO:0055114;GO:0050661;GO:0033014;GO:0008883	AT1G58290	HEMA1	Glutamyl-tRNA_reductase_family_protein	Encodes a protein with glutamyl-tRNA reductase (GluTR) activity, catalyzing the NADPH-dependent reduction of Glu-tRNA(Glu) to glutamate 1-semialdehyde (GSA) with the release of free tRNA(Glu). It is involved in the early steps of chlorophyll biosynthesis. protein_coding (HEMA1) GLUTAMYL-TRNA REDUCTASE (GLUTR);ARABIDOPSIS THALIANA HEMA 1 (AtHEMA1); (HEMA1)	TRUE	10	Cortex, Pericycle, Vascular bundle/Xylem pole pericycle, Stele, Endodermis, Epidermis, Xylem, Vascular bundle, Metaphloem, Cluster13	yellow	Root
Gm07_35512631	Medians_FarmCPU	pr_tip_depth	5.31e-09	35512630	35512632	Glyma.07G183100	Gm07	35445041	35447901	-	-64730		AT2G23970		Class_I_glutamine_amidotransferase-like_superfamily_protein	Class I glutamine amidotransferase-like superfamily protein;(source:Araport11) protein_coding	FALSE	9	Cortex, Pericycle, Vascular bundle/Xylem pole pericycle, Stele, Endodermis, Epidermis, Xylem, Vascular bundle, Metaphloem	yellow	Root
Gm07_35512631	Medians_FarmCPU	pr_tip_depth	5.31e-09	35512630	35512632	Glyma.07G183050	Gm07	35439794	35440466	-	-72165						FALSE	0
Gm07_35512631	Medians_FarmCPU	pr_tip_depth	5.31e-09	35512630	35512632	Glyma.07G184800	Gm07	35587017	35598387	+	74385	GO:0006813;GO:0055085;GO:0016021;GO:0015299;GO:0006812	AT4G04850	ATKEA3;KEA3	K+_efflux_antiporter_3	Encodes a potassium efflux antiporter; has three splice forms KEA3.1, KEA3.2, and KEA3.3, KEA3.2 is the most abundant splice form in all plant organs (silique, flower, leaf and root). KEA3.1 and KEA3.3 are minor variants that can be found in flowers and in leaves. KEA3 is localized to the thylakoid membrane and enriched in the stromal lamellae. It allows proton efflux from the thylakoid lumen by …	FALSE	10	Cortex, Pericycle, Vascular bundle/Xylem pole pericycle, Stele, Endodermis, Epidermis, Xylem, Vascular bundle, Metaphloem, Cluster13	turquoise	Root
Gm07_35512631	Medians_FarmCPU	pr_tip_depth	5.31e-09	35512630	35512632	Glyma.07G183000	Gm07	35429014	35432226	+	-80405		AT5G09570		Cox19-like_CHCH_family_protein	Twin CX9C domain protein. Induced by low phosphate or iron, drought and heat stress. Loss of both At12cys-1 and At12cys-2 lead to enhanced tolerance to drought and light stress and increased anti-oxidant capacity. protein_coding (AT12CYS-2) (AT12CYS-2)	FALSE	10	Cortex, Pericycle, Vascular bundle/Xylem pole pericycle, Stele, Endodermis, Epidermis, Xylem, Vascular bundle, Metaphloem, Cluster13	yellow	Root
Gm07_35512631	Medians_FarmCPU	pr_tip_depth	5.31e-09	35512630	35512632	Glyma.07G182900	Gm07	35418926	35427831	+	-84800	GO:0005525;GO:0003924	AT4G33650	ADL2;DRP3A	dynamin-related_protein_3A	Encodes a protein with high sequence similarity to the dynamin superfamily. Among those members ADL2 was most closely related to Dnm1p of yeast and likely a member of the Vps1p subfamily. Widely expressed in various tissues with highest expression in flower tissues. Localizes to the chloroplast, mitochondrion and peroxisome. Involved in peroxisome and mitochondria fission in combination with DRP3…	FALSE	10	Cortex, Pericycle, Vascular bundle/Xylem pole pericycle, Stele, Endodermis, Epidermis, Xylem, Vascular bundle, Metaphloem, Cluster13	turquoise	Root
Gm07_35512631	Medians_FarmCPU	pr_tip_depth	5.31e-09	35512630	35512632	Glyma.07G184900	Gm07	35599788	35607788	+	87156	GO:0016020;GO:0006810;GO:0005215	AT5G64500		Major_facilitator_superfamily_protein	Major facilitator superfamily protein protein_coding	TRUE	10	Cortex, Pericycle, Vascular bundle/Xylem pole pericycle, Stele, Endodermis, Epidermis, Xylem, Vascular bundle, Metaphloem, Cluster13	turquoise	Root
Gm10_11766051	Medians_FarmCPU	pr_tip_depth	2.02e-11	11766050	11766052	Glyma.10G089200	Gm10	11753371	11762517	-	-3534		AT3G60830	ARP7;ATARP7	actin-related_protein_7	Encodes an actin-related protein required for normal embryogenesis, plant architecture and floral organ abscission. protein_coding ACTIN-RELATED PROTEIN 7 (ARP7) ACTIN-RELATED PROTEIN 7 (ATARP7);ACTIN-RELATED PROTEIN 7 (ARP7); (ARP7)	FALSE	10	Cortex, Pericycle, Vascular bundle/Xylem pole pericycle, Stele, Endodermis, Epidermis, Xylem, Vascular bundle, Metaphloem, Cluster13	brown	Leaf
Gm10_11766051	Medians_FarmCPU	pr_tip_depth	2.02e-11	11766050	11766052	Glyma.10G089300	Gm10	11777793	11778344	+	11741		AT1G51400		Photosystem_II_5_kD_protein	Photosystem II 5 kD protein;(source:Araport11) protein_coding	FALSE	6	Cortex, Pericycle, Vascular bundle/Xylem pole pericycle, Stele, Epidermis, Cluster13	turquoise	Root
Gm10_11766051	Medians_FarmCPU	pr_tip_depth	2.02e-11	11766050	11766052	Glyma.10G089500	Gm10	11794965	11795855	-	28913		AT3G21055	PSBTN	photosystem_II_subunit_T	Encodes photosystem II 5 kD protein subunit PSII-T. This is a nuclear-encoded gene (PsbTn) which also has a plastid-encoded paralog (PsbTc). protein_coding PHOTOSYSTEM II SUBUNIT T (PSBTN) PHOTOSYSTEM II SUBUNIT T (PSBTN)	FALSE	8	Cortex, Pericycle, Vascular bundle/Xylem pole pericycle, Stele, Endodermis, Epidermis, Vascular bundle, Metaphloem	turquoise	Root
Gm10_11766051	Medians_FarmCPU	pr_tip_depth	2.02e-11	11766050	11766052	Glyma.10G089600	Gm10	11796058	11812133	-	30006	GO:0055114;GO:0050660;GO:0017150;GO:0008033	AT5G47970		Aldolase-type_TIM_barrel_family_protein	Aldolase-type TIM barrel family protein;(source:Araport11) protein_coding	FALSE	10	Cortex, Pericycle, Vascular bundle/Xylem pole pericycle, Stele, Endodermis, Epidermis, Xylem, Vascular bundle, Metaphloem, Cluster13	blue	Leaf
Gm10_11766051	Medians_FarmCPU	pr_tip_depth	2.02e-11	11766050	11766052	Glyma.10G089000	Gm10	11725899	11728270	+	-37781		AT2G28305	ATLOG1;LOG1	Putative_lysine_decarboxylase_family_protein	Putative lysine decarboxylase family protein;(source:Araport11) protein_coding LONELY GUY 1 (LOG1) (ATLOG1);LONELY GUY 1 (LOG1)	TRUE	3	Vascular bundle/Xylem pole pericycle, Endodermis, Metaphloem	turquoise	Root
Gm10_11766051	Medians_FarmCPU	pr_tip_depth	2.02e-11	11766050	11766052	Glyma.10G088900	Gm10	11714177	11719196	-	-46855	GO:0005975;GO:0004650	AT3G07970	QRT2	Pectin_lyase-like_superfamily_protein	Required for pollen separation during normal development. In qrt mutants, the outer walls of the four meiotic products of the pollen mother cell are fused, and pollen grains are released in tetrads.May be required for cell type-specific pectin degradation. protein_coding QUARTET 2 (QRT2) QUARTET 2 (QRT2)	FALSE	2	Cortex, Xylem	lavenderblush2	Unassigned
Gm10_11766051	Medians_FarmCPU	pr_tip_depth	2.02e-11	11766050	11766052	Glyma.10G089700	Gm10	11816123	11821417	+	50071		AT3G08010	ATAB2	RNA_binding	Encodes a chloroplast-localized protein ATAB2. ATAB2 is involved in the biogenesis of Photosystem I and II. ATAB2 has A/U-rich RNA-binding activity and presumably functions as an activator of translation with targets at PS I and PS II. protein_coding (ATAB2) (ATAB2)	FALSE	6	Cortex, Pericycle, Vascular bundle/Xylem pole pericycle, Stele, Endodermis, Epidermis	brown	Leaf
Gm10_11766051	Medians_FarmCPU	pr_tip_depth	2.02e-11	11766050	11766052	Glyma.10G089800	Gm10	11831700	11832697	-	65648	GO:0008270;GO:0005515	AT1G55530		RING/U-box_superfamily_protein	RING/U-box superfamily protein;(source:Araport11) protein_coding BCA2A ZINC FINGER ATL 6 (BTL06) BCA2A ZINC FINGER ATL 6 (BTL06)	FALSE	0		lightsteelblue	Leaf
Gm10_11766051	Medians_FarmCPU	pr_tip_depth	2.02e-11	11766050	11766052	Glyma.10G089900	Gm10	11840298	11844880	+	74246	GO:0055085;GO:0016021;GO:0015299;GO:0006812	AT3G52080	chx28	cation/hydrogen_exchanger_28	encodes a cation:proton exchanger expressed in pollen protein_coding CATION/HYDROGEN EXCHANGER 28 (chx28) CATION/HYDROGEN EXCHANGER 28 (chx28)	FALSE	0		green	Meristem
Gm10_11766051	Medians_FarmCPU	pr_tip_depth	2.02e-11	11766050	11766052	Glyma.10G090000	Gm10	11846239	11853490	-	80187	GO:0006265;GO:0005524;GO:0003918;GO:0003677	AT3G23890	ATTOPII;TOPII	topoisomerase_II	Encodes a topoisomerase II that is highly expressed in young seedlings. The protein is localized in the nucleus and gene expression levels are increased in proliferative tissues. protein_coding TOPOISOMERASE II (TOPII) (ATTOPII);TOPOISOMERASE II (TOPII)	FALSE	10	Cortex, Pericycle, Vascular bundle/Xylem pole pericycle, Stele, Endodermis, Epidermis, Xylem, Vascular bundle, Metaphloem, Cluster13	green	Meristem
Gm10_11766051	Medians_FarmCPU	pr_tip_depth	2.02e-11	11766050	11766052	Glyma.10G088700	Gm10	11677543	11685349	+	-80702		AT2G17030		F-box_family_protein_with_a_domain_of_unknown_function_(DUF295)	Encodes a SKP1/ASK-interacting protein. protein_coding SKP1/ASK-INTERACTING PROTEIN 23 (SKIP23) SKP1/ASK-INTERACTING PROTEIN 23 (SKIP23);F-BOX/DUF295 ANCESTRAL 11 (ATFDA11); (ATSKIP23)	FALSE	10	Cortex, Pericycle, Vascular bundle/Xylem pole pericycle, Stele, Endodermis, Epidermis, Xylem, Vascular bundle, Metaphloem, Cluster13	black	Hypocotyl
Gm10_11766051	Medians_FarmCPU	pr_tip_depth	2.02e-11	11766050	11766052	Glyma.10G088800	Gm10	11682660	11685020	+	-81031						TRUE			grey	Leaf
Gm10_11766051	Medians_FarmCPU	pr_tip_depth	2.02e-11	11766050	11766052	Glyma.10G090100	Gm10	11865150	11867914	-	99098		AT3G08030		Protein_of_unknown_function;_DUF642	The mRNA of this gene is expressed in viable seeds. Its detection in a dry seed lot has potential for use as a molecular marker for germination performance as absence of expression correlates with decreased germination. Encodes DUF642 cell wall protein. protein_coding (ATHA2-1) (ATHA2-1)	TRUE	10	Cortex, Pericycle, Vascular bundle/Xylem pole pericycle, Stele, Endodermis, Epidermis, Xylem, Vascular bundle, Metaphloem, Cluster13	turquoise	Root
Gm10_11766051	Medians_FarmCPU	pr_tip_depth	2.02e-11	11766050	11766052	Glyma.10G090300	Gm10	11910475	11910977	-	144423						FALSE
Gm10_11766051	Medians_FarmCPU	pr_tip_depth	2.02e-11	11766050	11766052	Glyma.10G088400	Gm10	11617992	11619480	-	-146571		AT5G17630		Nucleotide/sugar_transporter_family_protein	Phosphate translocator family member which resides in the plastid inner envelope membrane. Retrieves excessive pentose phosphates from the extra-plastidial space and makes them available to the plastids. protein_coding XYLULOSE 5-PHOSPHATE/PHOSPHATE TRANSLOCATOR (XPT) XYLULOSE 5-PHOSPHATE/PHOSPHATE TRANSLOCATOR (XPT)	FALSE	9	Cortex, Pericycle, Vascular bundle/Xylem pole pericycle, Stele, Endodermis, Epidermis, Xylem, Vascular bundle, Metaphloem	brown	Leaf
Gm10_11766051	Medians_FarmCPU	pr_tip_depth	2.02e-11	11766050	11766052	Glyma.10G090350	Gm10	11917146	11917780	+	151094						FALSE	2	Pericycle, Vascular bundle/Xylem pole pericycle
Gm10_11766051	Medians_FarmCPU	pr_tip_depth	2.02e-11	11766050	11766052	Glyma.10G088300	Gm10	11601773	11608010	-	-158041	GO:0006468;GO:0005524;GO:0004672	AT1G53570	MAP3KA;MAPKKK3	mitogen-activated_protein_kinase_kinase_kinase_3	Encodes a member of the MEKK subfamily that functions redundantly with MAPKKK5 to activate MPK3/6 downstream of multiple pattern recognition receptors and confer resistance to both bacterial and fungal pathogens. protein_coding MITOGEN-ACTIVATED PROTEIN KINASE KINASE KINASE 3 (MAP3KA) MAP KINASE KINASE KINASE 3 (MAPKKK3);MITOGEN-ACTIVATED PROTEIN KINASE KINASE KINASE 3 (MAP3KA)	FALSE	0
Gm10_11766051	Medians_FarmCPU	pr_tip_depth	2.02e-11	11766050	11766052	Glyma.10G090400	Gm10	11926595	11927463	+	160543		AT1G35430			transmembrane protein;(source:Araport11) protein_coding	FALSE	8	Cortex, Pericycle, Vascular bundle/Xylem pole pericycle, Stele, Endodermis, Epidermis, Xylem, Vascular bundle	grey	Leaf
Gm10_11766051	Medians_FarmCPU	pr_tip_depth	2.02e-11	11766050	11766052	Glyma.10G088200	Gm10	11592125	11594336	-	-171715	GO:0055114;GO:0020037;GO:0016705;GO:0005506	AT1G75130	CYP721A1	cytochrome_P450;_family_721;_subfamily_A;_polypeptide_1	member of CYP721A protein_coding CYTOCHROME P450, FAMILY 721, SUBFAMILY A, POLYPEPTIDE 1 (CYP721A1) CYTOCHROME P450, FAMILY 721, SUBFAMILY A, POLYPEPTIDE 1 (CYP721A1)	FALSE			yellowgreen	Unassigned
Gm10_11766051	Medians_FarmCPU	pr_tip_depth	2.02e-11	11766050	11766052	Glyma.10G090500	Gm10	11937814	11943513	+	171762	GO:0008168;GO:0008152;GO:0006694	AT5G13710	CPH;SMT1	sterol_methyltransferase_1	SMT1 controls the level of cholesterol in plants protein_coding STEROL METHYLTRANSFERASE 1 (SMT1) CEPHALOPOD (CPH);STEROL METHYLTRANSFERASE 1 (SMT1)	FALSE	10	Cortex, Pericycle, Vascular bundle/Xylem pole pericycle, Stele, Endodermis, Epidermis, Xylem, Vascular bundle, Metaphloem, Cluster13	brown	Leaf
Gm12_13953189	Medians_FarmCPU	pr_tip_depth	2.75e-14	13953188	13953190	Glyma.12G128000	Gm12	13959078	13960034	-	5888						TRUE	4	Cortex, Vascular bundle/Xylem pole pericycle, Endodermis, Epidermis	turquoise	Root
Gm12_13953189	Medians_FarmCPU	pr_tip_depth	2.75e-14	13953188	13953190	Glyma.12G127801	Gm12	13931265	13932241	-	-20948						FALSE	1	Endodermis
Gm12_13953189	Medians_FarmCPU	pr_tip_depth	2.75e-14	13953188	13953190	Glyma.12G127600	Gm12	13920783	13921777	+	-31412		AT1G06340		Plant_Tudor-like_protein	Plant Tudor-like protein;(source:Araport11) protein_coding	FALSE	10	Cortex, Pericycle, Vascular bundle/Xylem pole pericycle, Stele, Endodermis, Epidermis, Xylem, Vascular bundle, Metaphloem, Cluster13	brown	Leaf
Gm12_13953189	Medians_FarmCPU	pr_tip_depth	2.75e-14	13953188	13953190	Glyma.12G128100	Gm12	14033323	14037024	+	80133		AT2G42610	LSH10	Protein_of_unknown_function_(DUF640)	LIGHT-DEPENDENT SHORT HYPOCOTYLS-like protein (DUF640);(source:Araport11) protein_coding LIGHT SENSITIVE HYPOCOTYLS 10 (LSH10) LIGHT SENSITIVE HYPOCOTYLS 10 (LSH10)	FALSE	5	Cortex, Pericycle, Vascular bundle/Xylem pole pericycle, Endodermis, Xylem	turquoise	Root
Gm12_13953189	Medians_FarmCPU	pr_tip_depth	2.75e-14	13953188	13953190	Glyma.12G127400	Gm12	13862401	13863798	+	-89391		AT1G06320			hypothetical protein;(source:Araport11) protein_coding	FALSE	1	Cortex	tan	Leaf
Gm12_13953189	Medians_FarmCPU	pr_tip_depth	2.75e-14	13953188	13953190	Glyma.12G127300	Gm12	13860952	13862059	+	-91130	GO:0008234;GO:0006508	AT5G45890	SAG12	senescence-associated_gene_12	Senescence-associated gene 12 (SAG12) encoding a cysteine protease influenced by cytokinin, auxin, and sugars.Localized to special vacuole found during senescence called senescence associated vacuoles which are different from central vacuole in the tonoplast composition and pH. protein_coding SENESCENCE-ASSOCIATED GENE 12 (SAG12) SENESCENCE-ASSOCIATED GENE 12 (SAG12); (ATSAG12)	FALSE			plum2	Unassigned
Gm12_13953189	Medians_FarmCPU	pr_tip_depth	2.75e-14	13953188	13953190	Glyma.12G127200	Gm12	13855783	13856887	-	-96302	GO:0008234;GO:0006508	AT5G45890	SAG12	senescence-associated_gene_12	Senescence-associated gene 12 (SAG12) encoding a cysteine protease influenced by cytokinin, auxin, and sugars.Localized to special vacuole found during senescence called senescence associated vacuoles which are different from central vacuole in the tonoplast composition and pH. protein_coding SENESCENCE-ASSOCIATED GENE 12 (SAG12) SENESCENCE-ASSOCIATED GENE 12 (SAG12); (ATSAG12)	FALSE			darkgrey	Unassigned
Gm12_13953189	Medians_FarmCPU	pr_tip_depth	2.75e-14	13953188	13953190	Glyma.12G127100	Gm12	13854962	13855478	+	-97711	GO:0009733	AT4G34770		SAUR-like_auxin-responsive_protein_family_	SAUR-like auxin-responsive protein family;(source:Araport11) protein_coding SMALL AUXIN UPREGULATED RNA 1 (SAUR1) SMALL AUXIN UPREGULATED RNA 1 (SAUR1)	FALSE	0		turquoise	Root
Gm12_13953189	Medians_FarmCPU	pr_tip_depth	2.75e-14	13953188	13953190	Glyma.12G127000	Gm12	13849761	13850662	-	-102527	GO:0009733	AT4G38840		SAUR-like_auxin-responsive_protein_family_	SAUR-like auxin-responsive protein family;(source:Araport11) protein_coding SMALL AUXIN UPREGULATED RNA 14 (SAUR14) SMALL AUXIN UPREGULATED RNA 14 (SAUR14)	FALSE	0		paleturquoise	Unassigned
Gm12_13953189	Medians_FarmCPU	pr_tip_depth	2.75e-14	13953188	13953190	Glyma.12G126700	Gm12	13834550	13835258	-	-117931	GO:0009733	AT4G38840		SAUR-like_auxin-responsive_protein_family_	SAUR-like auxin-responsive protein family;(source:Araport11) protein_coding SMALL AUXIN UPREGULATED RNA 14 (SAUR14) SMALL AUXIN UPREGULATED RNA 14 (SAUR14)	FALSE
Gm12_13953189	Medians_FarmCPU	pr_tip_depth	2.75e-14	13953188	13953190	Glyma.12G126600	Gm12	13807630	13808401	-	-144788	GO:0009733	AT4G38840		SAUR-like_auxin-responsive_protein_family_	SAUR-like auxin-responsive protein family;(source:Araport11) protein_coding SMALL AUXIN UPREGULATED RNA 14 (SAUR14) SMALL AUXIN UPREGULATED RNA 14 (SAUR14)	FALSE	0		lightsteelblue	Leaf
Gm12_13953189	Medians_FarmCPU	pr_tip_depth	2.75e-14	13953188	13953190	Glyma.12G126500	Gm12	13805863	13807077	+	-146112	GO:0009733	AT4G38840		SAUR-like_auxin-responsive_protein_family_	SAUR-like auxin-responsive protein family;(source:Araport11) protein_coding SMALL AUXIN UPREGULATED RNA 14 (SAUR14) SMALL AUXIN UPREGULATED RNA 14 (SAUR14)	FALSE	0		turquoise	Root
Gm12_13953189	Medians_FarmCPU	pr_tip_depth	2.75e-14	13953188	13953190	Glyma.12G126400	Gm12	13805202	13805375	-	-147814						FALSE			brown	Leaf
Gm12_13953189	Medians_FarmCPU	pr_tip_depth	2.75e-14	13953188	13953190	Glyma.12G126300	Gm12	13800773	13801045	+	-152144	GO:0009733	AT4G38840		SAUR-like_auxin-responsive_protein_family_	SAUR-like auxin-responsive protein family;(source:Araport11) protein_coding SMALL AUXIN UPREGULATED RNA 14 (SAUR14) SMALL AUXIN UPREGULATED RNA 14 (SAUR14)	FALSE
Gm12_13953189	Medians_FarmCPU	pr_tip_depth	2.75e-14	13953188	13953190	Glyma.12G126200	Gm12	13796369	13796641	+	-156548	GO:0009733	AT4G38840		SAUR-like_auxin-responsive_protein_family_	SAUR-like auxin-responsive protein family;(source:Araport11) protein_coding SMALL AUXIN UPREGULATED RNA 14 (SAUR14) SMALL AUXIN UPREGULATED RNA 14 (SAUR14)	FALSE			floralwhite	Unassigned
Gm12_13953189	Medians_FarmCPU	pr_tip_depth	2.75e-14	13953188	13953190	Glyma.12G126100	Gm12	13790371	13790646	-	-162543	GO:0009733	AT4G38840		SAUR-like_auxin-responsive_protein_family_	SAUR-like auxin-responsive protein family;(source:Araport11) protein_coding SMALL AUXIN UPREGULATED RNA 14 (SAUR14) SMALL AUXIN UPREGULATED RNA 14 (SAUR14)	FALSE
Gm12_13953189	Medians_FarmCPU	pr_tip_depth	2.75e-14	13953188	13953190	Glyma.12G125900	Gm12	13776883	13777701	+	-175488	GO:0009733	AT4G38840		SAUR-like_auxin-responsive_protein_family_	SAUR-like auxin-responsive protein family;(source:Araport11) protein_coding SMALL AUXIN UPREGULATED RNA 14 (SAUR14) SMALL AUXIN UPREGULATED RNA 14 (SAUR14)	FALSE	0		turquoise	Root
Gm12_13953189	Medians_FarmCPU	pr_tip_depth	2.75e-14	13953188	13953190	Glyma.12G125800	Gm12	13775602	13776472	-	-176717	GO:0009733	AT4G38840		SAUR-like_auxin-responsive_protein_family_	SAUR-like auxin-responsive protein family;(source:Araport11) protein_coding SMALL AUXIN UPREGULATED RNA 14 (SAUR14) SMALL AUXIN UPREGULATED RNA 14 (SAUR14)	FALSE	0		turquoise	Root
Gm12_13953189	Medians_FarmCPU	pr_tip_depth	2.75e-14	13953188	13953190	Glyma.12G125550	Gm12	13738898	13743051	+	-210138						FALSE	0		purple	Hypocotyl
Gm12_13953189	Medians_FarmCPU	pr_tip_depth	2.75e-14	13953188	13953190	Glyma.12G125300	Gm12	13733154	13734067	+	-219122	GO:0009733	AT4G38840		SAUR-like_auxin-responsive_protein_family_	SAUR-like auxin-responsive protein family;(source:Araport11) protein_coding SMALL AUXIN UPREGULATED RNA 14 (SAUR14) SMALL AUXIN UPREGULATED RNA 14 (SAUR14)	FALSE	2	Endodermis, Epidermis	turquoise	Root
Gm15_10024740	Medians_FarmCPU	pr_tip_depth	4.88e-10	10024739	10024741	Glyma.15G127100	Gm15	10022167	10027625	-	0	GO:0043531	AT3G14470		NB-ARC_domain-containing_disease_resistance_protein	NB-ARC domain-containing disease resistance protein;(source:Araport11) protein_coding	FALSE	6	Cortex, Stele, Endodermis, Epidermis, Vascular bundle, Cluster13	turquoise	Root
Gm15_10024740	Medians_FarmCPU	pr_tip_depth	4.88e-10	10024739	10024741	Glyma.15G127000	Gm15	10012939	10017123	+	-7617						FALSE	5	Cortex, Vascular bundle/Xylem pole pericycle, Epidermis, Metaphloem, Cluster13	firebrick4	Unassigned
Gm15_10024740	Medians_FarmCPU	pr_tip_depth	4.88e-10	10024739	10024741	Glyma.15G127200	Gm15	10033083	10039335	-	8342	GO:0005515	AT5G45110	ATNPR3;NPR3	NPR1-like_protein_3	Encodes NPR3, a paralog of NPR1. Involved in negative regulation of defense responses against bacterial and oomycete pathogens. npr3 mutants has elevated level of PR1 expression. Interacts with TGA2, TGA3, TGA5 and TGA6 in yeast two hybrid assays. NPR3 and NPR4 are receptors for the immune signal salicylic acid. The mRNA is cell-to-cell mobile. protein_coding NPR1-LIKE PROTEIN 3 (NPR3) NPR1-LIKE …	TRUE	10	Cortex, Pericycle, Vascular bundle/Xylem pole pericycle, Stele, Endodermis, Epidermis, Xylem, Vascular bundle, Metaphloem, Cluster13	turquoise	Root
Gm15_10024740	Medians_FarmCPU	pr_tip_depth	4.88e-10	10024739	10024741	Glyma.15G126900	Gm15	10012125	10016053	-	-8687	GO:0043531	AT3G14470		NB-ARC_domain-containing_disease_resistance_protein	NB-ARC domain-containing disease resistance protein;(source:Araport11) protein_coding	FALSE	9	Cortex, Pericycle, Vascular bundle/Xylem pole pericycle, Stele, Endodermis, Epidermis, Vascular bundle, Metaphloem, Cluster13	blue	Leaf
Gm15_10024740	Medians_FarmCPU	pr_tip_depth	4.88e-10	10024739	10024741	Glyma.15G126800	Gm15	10003792	10008567	-	-16173		AT3G06880		Transducin/WD40_repeat-like_superfamily_protein	Transducin/WD40 repeat-like superfamily protein;(source:Araport11) protein_coding	FALSE	9	Cortex, Pericycle, Vascular bundle/Xylem pole pericycle, Stele, Endodermis, Epidermis, Xylem, Vascular bundle, Metaphloem	blue	Leaf
Gm15_10024740	Medians_FarmCPU	pr_tip_depth	4.88e-10	10024739	10024741	Glyma.15G127300	Gm15	10047401	10049238	-	22660	GO:0051082;GO:0016272;GO:0006457	AT1G49245		Prefoldin_chaperone_subunit_family_protein	Prefoldin chaperone subunit family protein;(source:Araport11) protein_coding	FALSE	9	Cortex, Pericycle, Vascular bundle/Xylem pole pericycle, Stele, Endodermis, Epidermis, Xylem, Vascular bundle, Metaphloem	turquoise	Root
Gm15_10024740	Medians_FarmCPU	pr_tip_depth	4.88e-10	10024739	10024741	Glyma.15G127400	Gm15	10052094	10060531	+	27353		AT1G08490	ATCPNIFS;ATNFS2;ATSUFS;CPNIFS;SUFS	chloroplastic_NIFS-like_cysteine_desulfurase	Chloroplastic NifS-like protein that can catalyze the conversion of cysteine into alanine and elemental sulfur (S(0)) and of selenocysteine into alanine and elemental Se (Se(0)). Overexpression enhances selenium tolerance and accumulation. protein_coding CHLOROPLASTIC NIFS-LIKE CYSTEINE DESULFURASE (CPNIFS) (ATNFS2); (ATSUFS); (SUFS); (ATCPNIFS);CHLOROPLASTIC NIFS-LIKE CYSTEINE DESULFURASE (CPNIF…	FALSE	10	Cortex, Pericycle, Vascular bundle/Xylem pole pericycle, Stele, Endodermis, Epidermis, Xylem, Vascular bundle, Metaphloem, Cluster13	blue	Leaf
Gm15_10024740	Medians_FarmCPU	pr_tip_depth	4.88e-10	10024739	10024741	Glyma.15G126700	Gm15	9991857	9997056	-	-27684	GO:0005515;GO:0003676	AT1G31280	AGO2	Argonaute_family_protein	Encodes Argonaute gene that binds viral siRNAs and is involved in antiviral defense response. Regulates innate immunity.Mutants have increased susceptibility to Potato virus X and tobacco rattle virus. protein_coding ARGONAUTE 2 (AGO2) (ATAGO2);ARGONAUTE 2 (AGO2)	FALSE	9	Cortex, Pericycle, Vascular bundle/Xylem pole pericycle, Stele, Endodermis, Epidermis, Xylem, Vascular bundle, Metaphloem	blue	Leaf
Gm15_10024740	Medians_FarmCPU	pr_tip_depth	4.88e-10	10024739	10024741	Glyma.15G126600	Gm15	9986006	9988938	-	-35802		AT3G05320		O-fucosyltransferase_family_protein	Golgi localized protein with similarity to protein O-fucosyltransferases. Mutants show lower seed set/reduced fertility. Mutant pollen fails to compete with wild type due to the inability to penetrate the stigma-style boundary. protein_coding O-FUCOSYL TRANSFERASE 1 (OFT1) (ATOFT1);O-FUCOSYL TRANSFERASE 1 (OFT1)	FALSE	2	Vascular bundle/Xylem pole pericycle, Stele	red	Meristem
Gm15_10024740	Medians_FarmCPU	pr_tip_depth	4.88e-10	10024739	10024741	Glyma.15G127450	Gm15	10061797	10062777	-	37056						FALSE	0		thistle2	Unassigned
Gm15_10024740	Medians_FarmCPU	pr_tip_depth	4.88e-10	10024739	10024741	Glyma.15G127500	Gm15	10065366	10071368	+	40625		AT2G43870		Pectin_lyase-like_superfamily_protein	Pectin lyase-like superfamily protein;(source:Araport11) protein_coding	FALSE	0		brown	Leaf
Gm15_10024740	Medians_FarmCPU	pr_tip_depth	4.88e-10	10024739	10024741	Glyma.15G126500	Gm15	9969842	9975983	-	-48757	GO:0016567;GO:0004842	AT4G19670		RING/U-box_superfamily_protein	RING/U-box superfamily protein;(source:Araport11) protein_coding	FALSE	10	Cortex, Pericycle, Vascular bundle/Xylem pole pericycle, Stele, Endodermis, Epidermis, Xylem, Vascular bundle, Metaphloem, Cluster13	blue	Leaf
Gm15_10024740	Medians_FarmCPU	pr_tip_depth	4.88e-10	10024739	10024741	Glyma.15G127567	Gm15	10076159	10082323	-	51418		AT1G71440	PFI;TFC_E	tubulin_folding_cofactor_E_/_Pfifferling_(PFI)	Encodes tubulin-folding cofactor E. Mutant embryos consist of one or a few grossly enlarged cells, surrounded by an endosperm that fails to cellularize and contains a few big nuclei. protein_coding PFIFFERLING (PFI) TUBULIN-FOLDING COFACTOR E (TFC E);PFIFFERLING (PFI)	TRUE	10	Cortex, Pericycle, Vascular bundle/Xylem pole pericycle, Stele, Endodermis, Epidermis, Xylem, Vascular bundle, Metaphloem, Cluster13	turquoise	Root
Gm15_10024740	Medians_FarmCPU	pr_tip_depth	4.88e-10	10024739	10024741	Glyma.15G127633	Gm15	10082324	10084677	-	57583		AT1G71440	PFI;TFC_E	tubulin_folding_cofactor_E_/_Pfifferling_(PFI)	Encodes tubulin-folding cofactor E. Mutant embryos consist of one or a few grossly enlarged cells, surrounded by an endosperm that fails to cellularize and contains a few big nuclei. protein_coding PFIFFERLING (PFI) TUBULIN-FOLDING COFACTOR E (TFC E);PFIFFERLING (PFI)	FALSE	10	Cortex, Pericycle, Vascular bundle/Xylem pole pericycle, Stele, Endodermis, Epidermis, Xylem, Vascular bundle, Metaphloem, Cluster13	blue	Leaf
Gm15_10024740	Medians_FarmCPU	pr_tip_depth	4.88e-10	10024739	10024741	Glyma.15G127700	Gm15	10088328	10100494	+	63587		AT5G45160		Root_hair_defective_3_GTP-binding_protein_(RHD3)	Root hair defective 3 GTP-binding protein (RHD3);(source:Araport11) protein_coding RHD-LIKE2 (RL2) RHD-LIKE2 (RL2)	FALSE	10	Cortex, Pericycle, Vascular bundle/Xylem pole pericycle, Stele, Endodermis, Epidermis, Xylem, Vascular bundle, Metaphloem, Cluster13	blue	Leaf
Gm15_10024740	Medians_FarmCPU	pr_tip_depth	4.88e-10	10024739	10024741	Glyma.15G126400	Gm15	9956494	9958269	+	-66471		AT5G45100		SBP_(S-ribonuclease_binding_protein)_family_protein	Encodes one of the BRGs (BOI-related gene) involved in resistance to Botrytis cinerea. protein_coding BOI-RELATED GENE 1 (BRG1) BOI-RELATED GENE 1 (BRG1)	TRUE	10	Cortex, Pericycle, Vascular bundle/Xylem pole pericycle, Stele, Endodermis, Epidermis, Xylem, Vascular bundle, Metaphloem, Cluster13	turquoise	Root
Gm15_10024740	Medians_FarmCPU	pr_tip_depth	4.88e-10	10024739	10024741	Glyma.15G127800	Gm15	10101940	10107768	-	77199		AT5G45170		Haloacid_dehalogenase-like_hydrolase_(HAD)_superfamily_protein	Haloacid dehalogenase-like hydrolase (HAD) superfamily protein;(source:Araport11) protein_coding	FALSE	10	Cortex, Pericycle, Vascular bundle/Xylem pole pericycle, Stele, Endodermis, Epidermis, Xylem, Vascular bundle, Metaphloem, Cluster13	brown	Leaf
Gm15_10024740	Medians_FarmCPU	pr_tip_depth	4.88e-10	10024739	10024741	Glyma.15G126200	Gm15	9936565	9941768	+	-82972	GO:0016192;GO:0016021	AT1G04760	ATVAMP726;VAMP726	vesicle-associated_membrane_protein_726	member of Synaptobrevin -like protein family protein_coding VESICLE-ASSOCIATED MEMBRANE PROTEIN 726 (VAMP726) VESICLE-ASSOCIATED MEMBRANE PROTEIN 726 (ATVAMP726);VESICLE-ASSOCIATED MEMBRANE PROTEIN 726 (VAMP726)	FALSE	10	Cortex, Pericycle, Vascular bundle/Xylem pole pericycle, Stele, Endodermis, Epidermis, Xylem, Vascular bundle, Metaphloem, Cluster13	turquoise	Root
Gm15_10024740	Medians_FarmCPU	pr_tip_depth	4.88e-10	10024739	10024741	Glyma.15G126100	Gm15	9929248	9929610	-	-95130	GO:0015979;GO:0009522	ATCG00630		PSAJ	Encodes subunit J of photosystem I. protein_coding (PSAJ) (PSAJ)	FALSE	8	Cortex, Pericycle, Vascular bundle/Xylem pole pericycle, Stele, Endodermis, Epidermis, Xylem, Vascular bundle
Gm15_10024740	Medians_FarmCPU	pr_tip_depth	4.88e-10	10024739	10024741	Glyma.15G126000	Gm15	9921253	9927234	-	-97506		AT1G29350		Kinase-related_protein_of_unknown_function_(DUF1296)	RNA polymerase II degradation factor-like protein (DUF1296);(source:Araport11) protein_coding	FALSE	10	Cortex, Pericycle, Vascular bundle/Xylem pole pericycle, Stele, Endodermis, Epidermis, Xylem, Vascular bundle, Metaphloem, Cluster13	brown	Leaf
Gm15_45526543	Medians_FarmCPU	pr_tip_depth	5.48e-13	45526542	45526544	Glyma.15G237600	Gm15	45533361	45544977	-	6817		AT3G54500			Member of a small family (4 proteins) in Arabidopsis that have some overlap in function. LNK2 along with LNK1 functions in the integration of light signaling and circadian clock. It is regulated by the clock TOC1 complex. Functions as a transcriptional coactivator. protein_coding NIGHT LIGHT-INDUCIBLE AND CLOCK-REGULATED GENE 2 (LNK2) NIGHT LIGHT-INDUCIBLE AND CLOCK-REGULATED GENE 2 (LNK2)	FALSE	10	Cortex, Pericycle, Vascular bundle/Xylem pole pericycle, Stele, Endodermis, Epidermis, Xylem, Vascular bundle, Metaphloem, Cluster13	turquoise	Root
Gm15_45526543	Medians_FarmCPU	pr_tip_depth	5.48e-13	45526542	45526544	Glyma.15G237500	Gm15	45518099	45519394	-	-7149	GO:0006508;GO:0004190	AT1G64830		Eukaryotic_aspartyl_protease_family_protein	Eukaryotic aspartyl protease family protein;(source:Araport11) protein_coding	FALSE			red	Meristem
Gm15_45526543	Medians_FarmCPU	pr_tip_depth	5.48e-13	45526542	45526544	Glyma.15G237800	Gm15	45577669	45582985	+	51125	GO:0005544;GO:0005509	AT5G12380	ANNAT8	annexin_8	Involved in multiple stress signaling pathways; negatively regulates RPW8.1-mediated cell death and disease resistance. protein_coding ANNEXIN 8 (ANNAT8) ANNEXIN 8 (ANN8);ANNEXIN 8 (ANNAT8)	FALSE	9	Cortex, Pericycle, Vascular bundle/Xylem pole pericycle, Stele, Endodermis, Epidermis, Xylem, Metaphloem, Cluster13	turquoise	Root
Gm15_45526543	Medians_FarmCPU	pr_tip_depth	5.48e-13	45526542	45526544	Glyma.15G237900	Gm15	45588241	45594626	+	61697	GO:0055114;GO:0016972	AT1G49880		Erv1/Alr_family_protein	Encodes Erv1, a component of the mitochondrial intermembrane space assembly machinery involved in the import pathway of the small intermembrane space proteins. It contains a Cys-X-Cys shuttle disulfide and oxidizes thioredoxin in vitro. Flavoenzyme-encoding gene. protein_coding ERV1 (Erv1) ERV1 (Erv1); (AtErv1);EMBRYO DEFECTIVE 3106 (EMB3106)	FALSE	10	Cortex, Pericycle, Vascular bundle/Xylem pole pericycle, Stele, Endodermis, Epidermis, Xylem, Vascular bundle, Metaphloem, Cluster13	blue	Leaf
Gm15_45526543	Medians_FarmCPU	pr_tip_depth	5.48e-13	45526542	45526544	Glyma.15G237300	Gm15	45454494	45459667	-	-66876	GO:0007275;GO:0006511;GO:0005634	AT3G61790		Protein_with_RING/U-box_and_TRAF-like_domains	SINAT E3 ubiquitin ligase involved in mediation of FREE1 and VPS23A degradation to modulate abscisic acid signaling. protein_coding (SINAT3) (SINAT3)	TRUE	10	Cortex, Pericycle, Vascular bundle/Xylem pole pericycle, Stele, Endodermis, Epidermis, Xylem, Vascular bundle, Metaphloem, Cluster13	turquoise	Root
Gm15_45526543	Medians_FarmCPU	pr_tip_depth	5.48e-13	45526542	45526544	Glyma.15G237200	Gm15	45410034	45413912	+	-112631	GO:0005515;GO:0006468;GO:0005524;GO:0004672	AT1G35710		Protein_kinase_family_protein_with_leucine-rich_repeat_domain	kinase family with leucine-rich repeat domain-containing protein;(source:Araport11) protein_coding	FALSE	0		brown	Leaf
Gm15_45526543	Medians_FarmCPU	pr_tip_depth	5.48e-13	45526542	45526544	Glyma.15G238400	Gm15	45644552	45652390	-	118008	GO:0005544;GO:0005509	AT2G38750	ANNAT4	annexin_4	Annexins are a family of calcium dependent membrane binding proteins though to be involved in Golgi mediated secretion. This is one of four annexins identified in Arabidopsis. protein_coding ANNEXIN 4 (ANNAT4) ANNEXIN 4 (ANNAT4); (ATANN4)	TRUE	9	Cortex, Pericycle, Vascular bundle/Xylem pole pericycle, Stele, Endodermis, Epidermis, Xylem, Metaphloem, Cluster13	yellow	Root
Gm15_45526543	Medians_FarmCPU	pr_tip_depth	5.48e-13	45526542	45526544	Glyma.15G238300	Gm15	45644974	45647032	+	118430	GO:0005544;GO:0005509	AT5G12380	ANNAT8	annexin_8	Involved in multiple stress signaling pathways; negatively regulates RPW8.1-mediated cell death and disease resistance. protein_coding ANNEXIN 8 (ANNAT8) ANNEXIN 8 (ANN8);ANNEXIN 8 (ANNAT8)	FALSE	1	Epidermis	grey	Leaf
Gm15_45526543	Medians_FarmCPU	pr_tip_depth	5.48e-13	45526542	45526544	Glyma.15G237000	Gm15	45398319	45400278	+	-126265		AT3G54470		uridine_5\'-monophosphate_synthase_/_UMP_synthase_(PYRE-F)_(UMPS)	encodes the bi-functional orotate phosphoribosyltransferase/orotidine-5-phosphate decarboxylase catalyzing the fifth and sixth step in the de novo pyrimidine ribonucleotide biosynthesis protein_coding	FALSE	0		thistle1	Unassigned
Gm15_45526543	Medians_FarmCPU	pr_tip_depth	5.48e-13	45526542	45526544	Glyma.15G236900	Gm15	45383137	45395750	-	-130793	GO:0005515;GO:0005096	AT3G07940		Calcium-dependent_ARF-type_GTPase_activating_protein_family	Calcium-dependent ARF-type GTPase activating protein family;(source:Araport11) protein_coding	FALSE	3	Cortex, Epidermis, Xylem	pink	Leaf
Gm15_45526543	Medians_FarmCPU	pr_tip_depth	5.48e-13	45526542	45526544	Glyma.15G238500	Gm15	45666378	45670874	+	139834	GO:0005544;GO:0005509	AT2G38760	ANN3;ANNAT3	annexin_3	Annexins are calcium binding proteins that are localized in the cytoplasm. When cytosolic Ca2+ increases, they relocate to the plasma membrane. The mRNA is cell-to-cell mobile. protein_coding ANNEXIN 3 (ANNAT3) ANNEXIN 3 (ANN3); (ATANN3);ANNEXIN 3 (ANNAT3)	TRUE	10	Cortex, Pericycle, Vascular bundle/Xylem pole pericycle, Stele, Endodermis, Epidermis, Xylem, Vascular bundle, Metaphloem, Cluster13	turquoise	Root
Gm15_45526543	Medians_FarmCPU	pr_tip_depth	5.48e-13	45526542	45526544	Glyma.15G238600	Gm15	45675325	45678792	+	148781						FALSE	6	Cortex, Pericycle, Vascular bundle/Xylem pole pericycle, Endodermis, Epidermis, Metaphloem	turquoise	Root
Gm15_45526543	Medians_FarmCPU	pr_tip_depth	5.48e-13	45526542	45526544	Glyma.15G236800	Gm15	45360759	45360914	+	-165629						TRUE			brown	Leaf
Gm15_45526543	Medians_FarmCPU	pr_tip_depth	5.48e-13	45526542	45526544	Glyma.15G236700	Gm15	45358695	45360434	+	-166109	GO:0045454;GO:0015035;GO:0009055	AT5G13810		Glutaredoxin_family_protein	Glutaredoxin family protein;(source:Araport11) protein_coding	FALSE	10	Cortex, Pericycle, Vascular bundle/Xylem pole pericycle, Stele, Endodermis, Epidermis, Xylem, Vascular bundle, Metaphloem, Cluster13	black	Hypocotyl
Gm15_45526543	Medians_FarmCPU	pr_tip_depth	5.48e-13	45526542	45526544	Glyma.15G238700	Gm15	45699382	45699633	-	172838	GO:0015979;GO:0046872;GO:0016021;GO:0009523	ATCG00580		photosystem_II_reaction_center_protein_E	PSII cytochrome b559. There have been many speculations about the function of Cyt b559, but the most favored at present is that it plays a protective role by acting as an electron acceptor or electron donor under conditions when electron flow through PSII is not optimized. protein_coding PHOTOSYSTEM II REACTION CENTER PROTEIN E (PSBE) PHOTOSYSTEM II REACTION CENTER PROTEIN E (PSBE)	FALSE			magenta	Leaf
Gm15_45526543	Medians_FarmCPU	pr_tip_depth	5.48e-13	45526542	45526544	Glyma.15G238851	Gm15	45700790	45700903	+	174246	GO:0009512	ATCG00600		PETG	Cytochrome b6-f complex, subunit V. Disruption of homologous gene in Chlamydomonas results in disruption of cytochrome b6-f complex. protein_coding (PETG) (PETG)	FALSE
Gm15_45526543	Medians_FarmCPU	pr_tip_depth	5.48e-13	45526542	45526544	Glyma.15G238900	Gm15	45706562	45707679	+	180018	GO:0006412;GO:0005840;GO:0005622;GO:0003735	ATCG00650		ribosomal_protein_S18	chloroplast-encoded ribosomal protein S18 protein_coding RIBOSOMAL PROTEIN S18 (RPS18) RIBOSOMAL PROTEIN S18 (RPS18)	FALSE	7	Cortex, Pericycle, Vascular bundle/Xylem pole pericycle, Stele, Endodermis, Epidermis, Xylem	turquoise	Root
Gm15_45526543	Medians_FarmCPU	pr_tip_depth	5.48e-13	45526542	45526544	Glyma.15G239000	Gm15	45706562	45707559	+	180018	GO:0006412;GO:0005840;GO:0005622;GO:0003735	ATCG00640		ribosomal_protein_L33	encodes a chloroplast ribosomal protein L33, a constituent of the large subunit of the ribosomal complex protein_coding RIBOSOMAL PROTEIN L33 (RPL33) RIBOSOMAL PROTEIN L33 (RPL33)	FALSE	0		bisque4	Unassigned
Gm15_45526543	Medians_FarmCPU	pr_tip_depth	5.48e-13	45526542	45526544	Glyma.15G239151	Gm15	45709127	45709712	-	182583						FALSE	3	Cortex, Vascular bundle/Xylem pole pericycle, Stele	grey	Leaf
Gm15_45526543	Medians_FarmCPU	pr_tip_depth	5.48e-13	45526542	45526544	Glyma.15G236500	Gm15	45307106	45328720	-	-197823	GO:0005515	AT5G13480	FY	Transducin/WD40_repeat-like_superfamily_protein	Encodes a protein with similarity to yeast Pfs2p, an mRNA processing factor. Involved in regulation of flowering time; affects FCA mRNA processing. Homozygous mutants are late flowering, null alleles are embryo lethal. protein_coding (FY) (WDR33); (FY)	FALSE	10	Cortex, Pericycle, Vascular bundle/Xylem pole pericycle, Stele, Endodermis, Epidermis, Xylem, Vascular bundle, Metaphloem, Cluster13	blue	Leaf
Gm20_2062349	Medians_FarmCPU	pr_tip_depth	3.45e-09	2062348	2062350	Glyma.20G019967	Gm20	2062048	2064003	+	0	GO:0006506;GO:0004584	AT1G11880		transferases;_transferring_hexosyl_groups	transferases, transferring hexosyl groups;(source:Araport11) protein_coding	FALSE	7	Cortex, Pericycle, Vascular bundle/Xylem pole pericycle, Stele, Endodermis, Xylem, Vascular bundle	red	Meristem
Gm20_2062349	Medians_FarmCPU	pr_tip_depth	3.45e-09	2062348	2062350	Glyma.20G019900	Gm20	2056136	2061205	+	-1144		AT2G35140		DCD_(Development_and_Cell_Death)_domain_protein	DCD (Development and Cell Death) domain protein;(source:Araport11) protein_coding	FALSE	10	Cortex, Pericycle, Vascular bundle/Xylem pole pericycle, Stele, Endodermis, Epidermis, Xylem, Vascular bundle, Metaphloem, Cluster13	green	Meristem
Gm20_2062349	Medians_FarmCPU	pr_tip_depth	3.45e-09	2062348	2062350	Glyma.20G020033	Gm20	2064407	2065050	+	2057	GO:0006506;GO:0004584	AT1G11880		transferases;_transferring_hexosyl_groups	transferases, transferring hexosyl groups;(source:Araport11) protein_coding	FALSE			blue	Leaf
Gm20_2062349	Medians_FarmCPU	pr_tip_depth	3.45e-09	2062348	2062350	Glyma.20G020100	Gm20	2066103	2069804	+	3753		AT4G19900		alpha_1;4-glycosyltransferase_family_protein	alpha 1,4-glycosyltransferase family protein;(source:Araport11) protein_coding	FALSE	9	Cortex, Pericycle, Vascular bundle/Xylem pole pericycle, Stele, Endodermis, Epidermis, Xylem, Vascular bundle, Metaphloem	blue	Leaf
Gm20_2062349	Medians_FarmCPU	pr_tip_depth	3.45e-09	2062348	2062350	Glyma.20G020200	Gm20	2070526	2075933	-	8176	GO:0007165;GO:0005515;GO:0043531	AT5G17680		disease_resistance_protein_(TIR-NBS-LRR_class);_putative	disease resistance protein (TIR-NBS-LRR class);(source:Araport11) protein_coding	FALSE	8	Cortex, Pericycle, Vascular bundle/Xylem pole pericycle, Endodermis, Epidermis, Xylem, Vascular bundle, Metaphloem	yellow	Root
Gm20_2062349	Medians_FarmCPU	pr_tip_depth	3.45e-09	2062348	2062350	Glyma.20G019800	Gm20	2048471	2053932	+	-8417		AT1G49350		pfkB-like_carbohydrate_kinase_family_protein	PsiMP Glycosylase (PUMY) that hydrolyzes PsiMP to uracil and ribose-5-phosphate. Acts together with PUMY in the peroxisome to prevent toxic pseudouridine monophosphate accumulation. Acts together with the a pseudouridine kinase PUKI in the peroxisome to prevent toxic pseudouridine monophosphate accumulation. protein_coding PSEUDORURIDINE KINASE (PUKI) PSEUDORURIDINE KINASE (PUKI)	TRUE	10	Cortex, Pericycle, Vascular bundle/Xylem pole pericycle, Stele, Endodermis, Epidermis, Xylem, Vascular bundle, Metaphloem, Cluster13	turquoise	Root
Gm20_2062349	Medians_FarmCPU	pr_tip_depth	3.45e-09	2062348	2062350	Glyma.20G019700	Gm20	2043876	2047462	-	-14887		AT2G35120		Single_hybrid_motif_superfamily_protein	Single hybrid motif superfamily protein;(source:Araport11) protein_coding	TRUE	10	Cortex, Pericycle, Vascular bundle/Xylem pole pericycle, Stele, Endodermis, Epidermis, Xylem, Vascular bundle, Metaphloem, Cluster13	turquoise	Root
Gm20_2062349	Medians_FarmCPU	pr_tip_depth	3.45e-09	2062348	2062350	Glyma.20G020300	Gm20	2082113	2087103	+	19763	GO:0005515	AT4G19880		Glutathione_S-transferase_family_protein	Glutathione S-transferase family protein;(source:Araport11) protein_coding	TRUE	10	Cortex, Pericycle, Vascular bundle/Xylem pole pericycle, Stele, Endodermis, Epidermis, Xylem, Vascular bundle, Metaphloem, Cluster13	turquoise	Root
Gm20_2062349	Medians_FarmCPU	pr_tip_depth	3.45e-09	2062348	2062350	Glyma.20G019600	Gm20	2039396	2042553	-	-19796		AT2G35120		Single_hybrid_motif_superfamily_protein	Single hybrid motif superfamily protein;(source:Araport11) protein_coding	TRUE	10	Cortex, Pericycle, Vascular bundle/Xylem pole pericycle, Stele, Endodermis, Epidermis, Xylem, Vascular bundle, Metaphloem, Cluster13	turquoise	Root
Gm20_2062349	Medians_FarmCPU	pr_tip_depth	3.45e-09	2062348	2062350	Glyma.20G019502	Gm20	2036174	2038613	+	-23736						FALSE	8	Cortex, Pericycle, Vascular bundle/Xylem pole pericycle, Stele, Endodermis, Epidermis, Vascular bundle, Cluster13	brown	Leaf
Gm20_2062349	Medians_FarmCPU	pr_tip_depth	3.45e-09	2062348	2062350	Glyma.20G019400	Gm20	2025559	2033781	-	-28568	GO:0005524	AT5G18820	EMB3007	TCP-1/cpn60_chaperonin_family_protein	Encodes a subunit of chloroplasts chaperonins that are involved in mediating the folding of newly synthesized, translocated, or stress-denatured proteins. Cpn60 subunits are: Cpn60alpha1 (At2g28000), AtCpn60alpha2 (At5g18820), AtCpn60beta1 (At1g55490), AtCpn60beta2 (At3g13470), AtCpn60beta3 (At5g56500), AtCpn60beta4 (At1g26230). protein_coding (CPNA2) EMBRYO DEFECTIVE 3007 (EMB3007);CHAPERONIN-60…	FALSE	10	Cortex, Pericycle, Vascular bundle/Xylem pole pericycle, Stele, Endodermis, Epidermis, Xylem, Vascular bundle, Metaphloem, Cluster13	blue	Leaf
Gm20_2062349	Medians_FarmCPU	pr_tip_depth	3.45e-09	2062348	2062350	Glyma.20G020400	Gm20	2096582	2107047	+	34232		AT5G45030		Trypsin_family_protein	Trypsin family protein;(source:Araport11) protein_coding	FALSE	10	Cortex, Pericycle, Vascular bundle/Xylem pole pericycle, Stele, Endodermis, Epidermis, Xylem, Vascular bundle, Metaphloem, Cluster13	blue	Leaf
Gm20_2062349	Medians_FarmCPU	pr_tip_depth	3.45e-09	2062348	2062350	Glyma.20G019300	Gm20	1995861	2018424	-	-43925		AT2G35110	GRL;NAP1;NAPP	transcription_activators	Component of the WAVE protein complex which act as activators of ARP2/3 complex involved in actin nucleation. Required for trichome morphogenesis. Mutant displays distorted trichomes, a phenotype that can be phenocopied by treatment of WT plants with actin-interacting drugs. Its ER localization is independent of upstream SPK1 activation signaling and the physical association with the WAVE/SCAR Re…	FALSE	10	Cortex, Pericycle, Vascular bundle/Xylem pole pericycle, Stele, Endodermis, Epidermis, Xylem, Vascular bundle, Metaphloem, Cluster13	blue	Leaf
Gm20_2062349	Medians_FarmCPU	pr_tip_depth	3.45e-09	2062348	2062350	Glyma.20G020600	Gm20	2124521	2127286	-	62171		AT5G45040		Cytochrome_c	Encodes a Class I cytochrome c family member possessing a high structural homology with photosynthetic cytochrome c(6) from cyanobacteria, but structurally and functionally distinct through the presence of a disulfide bond. protein_coding CYTOCHROME C6A (CYTC6A) CYTOCHROME C6A (CYTC6A)	FALSE	9	Cortex, Pericycle, Vascular bundle/Xylem pole pericycle, Stele, Endodermis, Epidermis, Xylem, Vascular bundle, Metaphloem	brown	Leaf
Gm20_2062349	Medians_FarmCPU	pr_tip_depth	3.45e-09	2062348	2062350	Glyma.20G019200	Gm20	1990797	1994539	+	-67810	GO:0046983;GO:0006351;GO:0003899	AT2G15430	NRPB3;NRPD3;NRPE3A;RBP36A;RPB35.5A	DNA-directed_RNA_polymerase_family_protein	Non-catalytic subunit of nuclear DNA-dependent RNA polymerases II, IV and V; homologous to budding yeast RPB3 and the E. coli RNA polymerase alpha subunit. A closely related paralog, encoded by At2g15400, can substitute for At2g15430 in the context of Pol V. protein_coding (NRPB3) (NRPD3); (RBP36A); (RPB35.5A); (NRPB3); (NRPE3A)	TRUE	7	Cortex, Pericycle, Vascular bundle/Xylem pole pericycle, Stele, Endodermis, Epidermis, Xylem	greenyellow	Leaf
Gm20_2062349	Medians_FarmCPU	pr_tip_depth	3.45e-09	2062348	2062350	Glyma.20G020800	Gm20	2130911	2137119	+	68561	GO:0008374;GO:0006629	AT4G19860		alpha/beta-Hydrolases_superfamily_protein	Encodes a cytosolic calcium-independent phospholipase A. protein_coding	TRUE	10	Cortex, Pericycle, Vascular bundle/Xylem pole pericycle, Stele, Endodermis, Epidermis, Xylem, Vascular bundle, Metaphloem, Cluster13	turquoise	Root
Gm20_2062349	Medians_FarmCPU	pr_tip_depth	3.45e-09	2062348	2062350	Glyma.20G020900	Gm20	2137125	2140812	-	74775		AT4G19840	ATPP2-A1;ATPP2A-1;PP2-A1	phloem_protein_2-A1	encodes a phloem lectin, similar to phloem lectin in cucumber and celery. Gene is expressed in the phloem, predominantly in the companion cells. The mRNA is cell-to-cell mobile. protein_coding PHLOEM PROTEIN 2-A1 (PP2-A1) PHLOEM PROTEIN 2-A1 (ATPP2-A1);ARATHNICTABA 5 (AN5);PHLOEM PROTEIN 2-A1 (PP2-A1);PHLOEM PROTEIN 2-A1 (ATPP2A-1)	FALSE	7	Cortex, Pericycle, Endodermis, Epidermis, Xylem, Metaphloem, Cluster13	blue	Leaf
Gm20_2062349	Medians_FarmCPU	pr_tip_depth	3.45e-09	2062348	2062350	Glyma.20G019100	Gm20	1981470	1984866	+	-77483	GO:0055114;GO:0032542	AT1G31170	ATSRX;SRX	sulfiredoxin	encodes a cysteine-sulfinic acid reductase (sulfiredoxin - EC 1.8.98.2) capable of reducing overoxidized plastidic 2-Cys-Prx involved in peroxide detoxification and response to oxidative stress protein_coding SULFIREDOXIN (SRX) SULFIREDOXIN (SRX)	FALSE	10	Cortex, Pericycle, Vascular bundle/Xylem pole pericycle, Stele, Endodermis, Epidermis, Xylem, Vascular bundle, Metaphloem, Cluster13	blue	Leaf
Gm20_2062349	Medians_FarmCPU	pr_tip_depth	3.45e-09	2062348	2062350	Glyma.20G021000	Gm20	2142964	2145450	-	80614		AT4G19840	ATPP2-A1;ATPP2A-1;PP2-A1	phloem_protein_2-A1	encodes a phloem lectin, similar to phloem lectin in cucumber and celery. Gene is expressed in the phloem, predominantly in the companion cells. The mRNA is cell-to-cell mobile. protein_coding PHLOEM PROTEIN 2-A1 (PP2-A1) PHLOEM PROTEIN 2-A1 (ATPP2-A1);ARATHNICTABA 5 (AN5);PHLOEM PROTEIN 2-A1 (PP2-A1);PHLOEM PROTEIN 2-A1 (ATPP2A-1)	FALSE			blue	Leaf
Gm20_2062349	Medians_FarmCPU	pr_tip_depth	3.45e-09	2062348	2062350	Glyma.20G019000	Gm20	1976605	1981202	+	-81147		AT2G35100	ARAD1	Exostosin_family_protein	Putative glycosyltransferase, similar to other CAZy Family 47 proteins. The protein is predicted to be a type 2 membrane protein with a signal anchor and is predicted to be targeted to the secretory pathway and to have a single transmembrane helix near the N terminus; hence, the protein has the features expected for a type II membrane protein targeted to the Golgi vesicles. The gene was shown to …	FALSE	10	Cortex, Pericycle, Vascular bundle/Xylem pole pericycle, Stele, Endodermis, Epidermis, Xylem, Vascular bundle, Metaphloem, Cluster13	blue	Leaf
Gm02_23961034	Medians_FarmCPU	total_root_length	3.48e-09	23961033	23961035	Glyma.02G164116	Gm02	24046012	24048673	-	84977	GO:0046983	AT2G41130		basic_helix-loop-helix_(bHLH)_DNA-binding_superfamily_protein	Encodes STC8 (salt tolerant callus 8)/bHLH106 (basic helix-loop-helix transcription factor bHLH106). Knockout lines are more sensitive to NaCl, KCl, LiCl, ABA, and low temperatures than the wild-type. protein_coding (BHLH106) (BHLH106);SALT TOLERANT CALLUS 8 (STC8)	FALSE	5	Cortex, Pericycle, Vascular bundle/Xylem pole pericycle, Stele, Vascular bundle	turquoise	Root
Gm06_41838269	Medians_FarmCPU	total_root_length	7.86e-09	41838268	41838270	Glyma.06G250600	Gm06	41837660	41843693	-	0		AT5G05800			Myb/SANT-like DNA-binding domain protein;(source:Araport11) protein_coding	FALSE	3	Cortex, Vascular bundle/Xylem pole pericycle, Stele	grey	Leaf
Gm06_41838269	Medians_FarmCPU	total_root_length	7.86e-09	41838268	41838270	Glyma.06G250700	Gm06	41875715	41878193	-	37445		AT4G37210		Tetratricopeptide_repeat_(TPR)-like_superfamily_protein	Encodes a predominantly nuclear histone chaperone that promotes [H3-H4]2 tetrasome formation and does not promote disassembly of in vitro preassembled tetrasomes. protein_coding NUCLEAR AUTOANTIGENIC SPERM PROTEIN (NASP) NUCLEAR AUTOANTIGENIC SPERM PROTEIN (NASP)	FALSE	0		salmon	Unassigned
Gm06_41838269	Medians_FarmCPU	total_root_length	7.86e-09	41838268	41838270	Glyma.06G250500	Gm06	41782601	41789521	+	-48748		AT2G20825	ULT2	Developmental_regulator;_ULTRAPETALA	Developmental regulator, ULTRAPETALA;(source:Araport11) protein_coding ULTRAPETALA 2 (ULT2) ULTRAPETALA 2 (ULT2)	FALSE	1	Epidermis	grey	Leaf
Gm06_41838269	Medians_FarmCPU	total_root_length	7.86e-09	41838268	41838270	Glyma.06G250751	Gm06	41899480	41900035	+	61210						FALSE			blue	Leaf
Gm06_41838269	Medians_FarmCPU	total_root_length	7.86e-09	41838268	41838270	Glyma.06G250400	Gm06	41758805	41765416	+	-72853		AT2G20825	ULT2	Developmental_regulator;_ULTRAPETALA	Developmental regulator, ULTRAPETALA;(source:Araport11) protein_coding ULTRAPETALA 2 (ULT2) ULTRAPETALA 2 (ULT2)	FALSE	1	Epidermis
Gm06_41838269	Medians_FarmCPU	total_root_length	7.86e-09	41838268	41838270	Glyma.06G250901	Gm06	41939589	41942068	+	101319		AT2G20825	ULT2	Developmental_regulator;_ULTRAPETALA	Developmental regulator, ULTRAPETALA;(source:Araport11) protein_coding ULTRAPETALA 2 (ULT2) ULTRAPETALA 2 (ULT2)	FALSE	4	Cortex, Vascular bundle/Xylem pole pericycle, Stele, Endodermis	grey	Leaf
Gm06_41838269	Medians_FarmCPU	total_root_length	7.86e-09	41838268	41838270	Glyma.06G250300	Gm06	41722952	41732844	+	-105425		AT2G20825	ULT2	Developmental_regulator;_ULTRAPETALA	Developmental regulator, ULTRAPETALA;(source:Araport11) protein_coding ULTRAPETALA 2 (ULT2) ULTRAPETALA 2 (ULT2)	FALSE	1	Vascular bundle	brown	Leaf
Gm06_41838269	Medians_FarmCPU	total_root_length	7.86e-09	41838268	41838270	Glyma.06G250100	Gm06	41697249	41702504	+	-135765	GO:0005515	AT3G13682	LDL2	LSD1-like2	Encodes a homolog of human Lysine-Specific Demethylase1. Involved in H3K4 methylation of target genes including the flowering loci FLC and FWA. protein_coding LSD1-LIKE2 (LDL2) LSD1-LIKE2 (LDL2)	FALSE	10	Cortex, Pericycle, Vascular bundle/Xylem pole pericycle, Stele, Endodermis, Epidermis, Xylem, Vascular bundle, Metaphloem, Cluster13	brown	Leaf
Gm06_41838269	Medians_FarmCPU	total_root_length	7.86e-09	41838268	41838270	Glyma.06G249800	Gm06	41614674	41616113	+	-222156	GO:0009607;GO:0006952	AT5G45870	PYL12;RCAR6	PYR1-like_12	Encodes a member of the PYR (pyrabactin resistance )/PYL(PYR1-like)/RCAR (regulatory components of ABA receptor) family proteins with 14 members. PYR/PYL/RCAR family proteins function as abscisic acid sensors. Mediate ABA-dependent regulation of protein phosphatase 2Cs ABI1 and ABI2. protein_coding PYR1-LIKE 12 (PYL12) REGULATORY COMPONENTS OF ABA RECEPTOR 6 (RCAR6);PYR1-LIKE 12 (PYL12)	TRUE	10	Cortex, Pericycle, Vascular bundle/Xylem pole pericycle, Stele, Endodermis, Epidermis, Xylem, Vascular bundle, Metaphloem, Cluster13	turquoise	Root
Gm06_41838269	Medians_FarmCPU	total_root_length	7.86e-09	41838268	41838270	Glyma.06G249700	Gm06	41597488	41599462	-	-238807		AT5G54370		Late_embryogenesis_abundant_(LEA)_protein-related	Late embryogenesis abundant (LEA) protein-like protein;(source:Araport11) protein_coding	TRUE	10	Cortex, Pericycle, Vascular bundle/Xylem pole pericycle, Stele, Endodermis, Epidermis, Xylem, Vascular bundle, Metaphloem, Cluster13	turquoise	Root
Gm06_41838269	Medians_FarmCPU	total_root_length	7.86e-09	41838268	41838270	Glyma.06G249600	Gm06	41555643	41556396	+	-281873		AT1G52855			hypothetical protein;(source:Araport11) protein_coding	TRUE	0		yellow	Root
Gm06_41838269	Medians_FarmCPU	total_root_length	7.86e-09	41838268	41838270	Glyma.06G249500	Gm06	41538584	41544291	-	-293978	GO:0046854	AT5G54390	AHL;ATAHL;HL	HAL2-like	Encodes a 3-phosphoadenosine-5-phosphate (PAP) phosphatase that is sensitive to physiological concentrations of Na+. It does not also act as inositol polyphosphate 1-phosphatases, which other members of the HAL2-like family do. It is proposed that AHL acts in concert with sulphotransferases to prevent both the toxicity of PAP on RNA processing enzymes as well as the product inhibition of PAP on s…	FALSE	7	Cortex, Pericycle, Vascular bundle/Xylem pole pericycle, Stele, Endodermis, Epidermis, Cluster13	turquoise	Root
Gm06_42199048	Medians_FarmCPU	total_root_length	4.31e-21	42199047	42199049	Glyma.06G252100	Gm06	42206254	42208458	+	7205		AT2G20825	ULT2	Developmental_regulator;_ULTRAPETALA	Developmental regulator, ULTRAPETALA;(source:Araport11) protein_coding ULTRAPETALA 2 (ULT2) ULTRAPETALA 2 (ULT2)	FALSE	4	Cortex, Vascular bundle/Xylem pole pericycle, Stele, Xylem	turquoise	Root
Gm06_42199048	Medians_FarmCPU	total_root_length	4.31e-21	42199047	42199049	Glyma.06G251900	Gm06	42156722	42157984	+	-41064	GO:0016788	AT5G03610		GDSL-like_Lipase/Acylhydrolase_superfamily_protein	GDSL-motif esterase/acyltransferase/lipase. Enzyme group with broad substrate specificity that may catalyze acyltransfer or hydrolase reactions with lipid and non-lipid substrates. protein_coding (GGL25) (GGL25)	FALSE
Gm06_42199048	Medians_FarmCPU	total_root_length	4.31e-21	42199047	42199049	Glyma.06G252433	Gm06	42267726	42269781	-	68677						FALSE			thistle1	Unassigned
Gm06_42199048	Medians_FarmCPU	total_root_length	4.31e-21	42199047	42199049	Glyma.06G252566	Gm06	42312306	42314016	+	113257	GO:0016758;GO:0008152	AT5G17050	UGT78D2	UDP-glucosyl_transferase_78D2	The At5g17050 encodes a anthocyanidin 3-O-glucosyltransferase which specifically glucosylates the 3-position of the flavonoid C-ring. Anthocyanidins such as cyanidin and pelargonidin as well as flavonols such as kaempferol and quercetin are accepted substrates. protein_coding UDP-GLUCOSYL TRANSFERASE 78D2 (UGT78D2) UDP-GLUCOSYL TRANSFERASE 78D2 (UGT78D2)	FALSE	1	Cortex
Gm06_42199048	Medians_FarmCPU	total_root_length	4.31e-21	42199047	42199049	Glyma.06G252800	Gm06	42338859	42340652	+	139810		AT1G80410	EMB2753	tetratricopeptide_repeat_(TPR)-containing_protein	Encodes the catalytic subunit of a N-terminal acetyltransferase. protein_coding NAA15 (NAA15) MUTANT,SNC1-ENHANCING 6 (MUSE6);OMISHA (OMA);EMBRYO DEFECTIVE 2753 (EMB2753);NAA15 (NAA15)	FALSE			grey	Leaf
Gm06_42199048	Medians_FarmCPU	total_root_length	4.31e-21	42199047	42199049	Glyma.06G250901	Gm06	41939589	41942068	+	-256980		AT2G20825	ULT2	Developmental_regulator;_ULTRAPETALA	Developmental regulator, ULTRAPETALA;(source:Araport11) protein_coding ULTRAPETALA 2 (ULT2) ULTRAPETALA 2 (ULT2)	FALSE	4	Cortex, Vascular bundle/Xylem pole pericycle, Stele, Endodermis	grey	Leaf
Gm06_42199048	Medians_FarmCPU	total_root_length	4.31e-21	42199047	42199049	Glyma.06G250751	Gm06	41899480	41900035	+	-299013						FALSE			blue	Leaf
Gm07_40840782	Medians_FarmCPU	total_root_length	7.31e-09	40840781	40840783	Glyma.07G227400	Gm07	40828535	40834903	-	-5879	GO:0006355;GO:0005634;GO:0003677;GO:0003700	AT5G08550	ILP1	GC-rich_sequence_DNA-binding_factor-like_protein	Encodes a transcriptional repressor that is homologous to the C-terminal region of mammalian GC binding factor. It regulates endoreduplication through control of CYC2A expression. protein_coding INCREASED LEVEL OF POLYPLOIDY1-1D (ILP1) INCREASED LEVEL OF POLYPLOIDY1-1D (ILP1)	FALSE	10	Cortex, Pericycle, Vascular bundle/Xylem pole pericycle, Stele, Endodermis, Epidermis, Xylem, Vascular bundle, Metaphloem, Cluster13	brown	Leaf
Gm07_40840782	Medians_FarmCPU	total_root_length	7.31e-09	40840781	40840783	Glyma.07G227600	Gm07	40854386	40861214	-	13603		AT1G13970		Protein_of_unknown_function_(DUF1336)	beta-hexosaminidase (DUF1336);(source:Araport11) protein_coding	TRUE	8	Cortex, Pericycle, Vascular bundle/Xylem pole pericycle, Stele, Endodermis, Epidermis, Xylem, Cluster13	turquoise	Root
Gm07_40840782	Medians_FarmCPU	total_root_length	7.31e-09	40840781	40840783	Glyma.07G227200	Gm07	40810227	40815567	+	-25215	GO:0043565;GO:0006355;GO:0003700	AT2G03340	WRKY3	WRKY_DNA-binding_protein_3	Encodes WRKY DNA-binding protein 3 (WRKY3). protein_coding WRKY DNA-BINDING PROTEIN 3 (WRKY3) WRKY DNA-BINDING PROTEIN 3 (WRKY3)	FALSE	9	Cortex, Pericycle, Vascular bundle/Xylem pole pericycle, Endodermis, Epidermis, Xylem, Vascular bundle, Metaphloem, Cluster13	turquoise	Root
Gm07_40840782	Medians_FarmCPU	total_root_length	7.31e-09	40840781	40840783	Glyma.07G227700	Gm07	40867875	40874309	+	27092	GO:0008270	AT1G69420		DHHC-type_zinc_finger_family_protein	DHHC-type zinc finger family protein;(source:Araport11) protein_coding	FALSE	10	Cortex, Pericycle, Vascular bundle/Xylem pole pericycle, Stele, Endodermis, Epidermis, Xylem, Vascular bundle, Metaphloem, Cluster13	yellow	Root
Gm07_40840782	Medians_FarmCPU	total_root_length	7.31e-09	40840781	40840783	Glyma.07G227750	Gm07	40875949	40877565	-	35166		AT3G11810			transmembrane protein;(source:Araport11) protein_coding	FALSE	9	Cortex, Pericycle, Vascular bundle/Xylem pole pericycle, Stele, Endodermis, Epidermis, Xylem, Vascular bundle, Cluster13	turquoise	Root
Gm07_40840782	Medians_FarmCPU	total_root_length	7.31e-09	40840781	40840783	Glyma.07G227100	Gm07	40776902	40784460	-	-56322		AT1G13940		Plant_protein_of_unknown_function_(DUF863)	T-box transcription factor, putative (DUF863);(source:Araport11) protein_coding	FALSE	10	Cortex, Pericycle, Vascular bundle/Xylem pole pericycle, Stele, Endodermis, Epidermis, Xylem, Vascular bundle, Metaphloem, Cluster13	blue	Leaf
Gm07_40840782	Medians_FarmCPU	total_root_length	7.31e-09	40840781	40840783	Glyma.07G227800	Gm07	40897933	40899726	+	57150		AT1G26650			Son of sevenless protein;(source:Araport11) protein_coding	FALSE	5	Cortex, Vascular bundle/Xylem pole pericycle, Stele, Endodermis, Xylem	blue	Leaf
Gm07_40840782	Medians_FarmCPU	total_root_length	7.31e-09	40840781	40840783	Glyma.07G227900	Gm07	40903763	40904852	-	62980		AT5G52545			RNA-binding protein-like RNA recognition motif protein;(source:Araport11) protein_coding	FALSE	1	Cortex	salmon	Unassigned
Gm07_40840782	Medians_FarmCPU	total_root_length	7.31e-09	40840781	40840783	Glyma.07G228000	Gm07	40910251	40917380	+	69468	GO:0006468;GO:0004672	AT1G14000	VIK	VH1-interacting_kinase	Encodes a protein with similarity to members of the C1 subgroup of MAP kinase kinase kinases. Interacts physically with the receptor kinase BRL2/VH1 and appears to be involved in auxin and brassinosteriod signaling. The mRNA is cell-to-cell mobile. protein_coding VH1-INTERACTING KINASE (VIK) VH1-INTERACTING KINASE (VIK)	FALSE	10	Cortex, Pericycle, Vascular bundle/Xylem pole pericycle, Stele, Endodermis, Epidermis, Xylem, Vascular bundle, Metaphloem, Cluster13	turquoise	Root
Gm07_40840782	Medians_FarmCPU	total_root_length	7.31e-09	40840781	40840783	Glyma.07G226900	Gm07	40761135	40764877	-	-75905		AT1G26580			ELM2 domain protein;(source:Araport11) protein_coding	TRUE	10	Cortex, Pericycle, Vascular bundle/Xylem pole pericycle, Stele, Endodermis, Epidermis, Xylem, Vascular bundle, Metaphloem, Cluster13	turquoise	Root
Gm07_40840782	Medians_FarmCPU	total_root_length	7.31e-09	40840781	40840783	Glyma.07G226800	Gm07	40751663	40754206	-	-86576		AT1G26610		C2H2-like_zinc_finger_protein	C2H2-like zinc finger protein;(source:Araport11) protein_coding	FALSE	3	Cortex, Pericycle, Endodermis	red	Meristem
Gm07_40840782	Medians_FarmCPU	total_root_length	7.31e-09	40840781	40840783	Glyma.07G228100	Gm07	40941834	40944868	-	101051	GO:0016021;GO:0006810	AT1G26690		emp24/gp25L/p24_family/GOLD_family_protein	emp24/gp25L/p24 family/GOLD family protein;(source:Araport11) protein_coding	TRUE	10	Cortex, Pericycle, Vascular bundle/Xylem pole pericycle, Stele, Endodermis, Epidermis, Xylem, Vascular bundle, Metaphloem, Cluster13	turquoise	Root
Gm07_40840782	Medians_FarmCPU	total_root_length	7.31e-09	40840781	40840783	Glyma.07G226700	Gm07	40731805	40736680	-	-104102		AT1G13920		Remorin_family_protein	Remorin family protein;(source:Araport11) protein_coding	TRUE	7	Cortex, Pericycle, Vascular bundle/Xylem pole pericycle, Endodermis, Epidermis, Xylem, Cluster13	brown	Leaf
Gm07_40840782	Medians_FarmCPU	total_root_length	7.31e-09	40840781	40840783	Glyma.07G226633	Gm07	40729566	40730458	-	-110324		AT1G13930			Involved in response to salt stress. Knockout mutants are hypersensitive to salt stress. The mRNA is cell-to-cell mobile. protein_coding	FALSE	8	Cortex, Pericycle, Vascular bundle/Xylem pole pericycle, Stele, Endodermis, Epidermis, Vascular bundle, Metaphloem
Gm07_40840782	Medians_FarmCPU	total_root_length	7.31e-09	40840781	40840783	Glyma.07G228200	Gm07	40954518	40961482	+	113735		AT1G14020		O-fucosyltransferase_family_protein	O-fucosyltransferase family protein;(source:Araport11) protein_coding RG-I RHAMNOSYLTRANSFERASE 4 (RRT4) RG-I RHAMNOSYLTRANSFERASE 4 (RRT4)	TRUE	9	Cortex, Pericycle, Vascular bundle/Xylem pole pericycle, Stele, Endodermis, Epidermis, Xylem, Vascular bundle, Metaphloem	turquoise	Root
Gm07_40840782	Medians_FarmCPU	total_root_length	7.31e-09	40840781	40840783	Glyma.07G226567	Gm07	40724767	40725527	-	-115255		AT1G13930			Involved in response to salt stress. Knockout mutants are hypersensitive to salt stress. The mRNA is cell-to-cell mobile. protein_coding	FALSE	6	Cortex, Pericycle, Vascular bundle/Xylem pole pericycle, Stele, Epidermis, Xylem	brown	Leaf
Gm07_40840782	Medians_FarmCPU	total_root_length	7.31e-09	40840781	40840783	Glyma.07G228300	Gm07	40961548	40965637	-	120765	GO:0005515	AT1G14030		Rubisco_methyltransferase_family_protein	Encodes a lysine methyltransferase whose main soluble physiological substrates are chloroplastic fructose 1,6-bisphosphate aldolases, FBA1, FBA2, and FBA3. Lysines near the C-terminal end of the target proteins are trimethylated. protein_coding LYSINE METHYLTRANSFERASE (LSMT)-LIKE (LSMT-L) LYSINE METHYLTRANSFERASE (LSMT)-LIKE (LSMT-L)	FALSE	10	Cortex, Pericycle, Vascular bundle/Xylem pole pericycle, Stele, Endodermis, Epidermis, Xylem, Vascular bundle, Metaphloem, Cluster13	turquoise	Root
Gm07_40840782	Medians_FarmCPU	total_root_length	7.31e-09	40840781	40840783	Glyma.07G226500	Gm07	40713186	40718083	+	-122699	GO:0016020;GO:0004970	AT2G29100	ATGLR2.9;GLR2.9	glutamate_receptor_2.9	member of Putative ligand-gated ion channel subunit family protein_coding GLUTAMATE RECEPTOR 2.9 (GLR2.9) GLUTAMATE RECEPTOR 2.9 (ATGLR2.9);GLUTAMATE RECEPTOR 2.9 (GLR2.9);GLUTAMATE RECEPTOR 2.9 (GLR2.9)	FALSE	1	Cortex	brown	Leaf
Gm07_40840782	Medians_FarmCPU	total_root_length	7.31e-09	40840781	40840783	Glyma.07G226400	Gm07	40699631	40707472	-	-133310	GO:0016020;GO:0004970	AT2G29110	ATGLR2.8;GLR2.8	glutamate_receptor_2.8	member of Putative ligand-gated ion channel subunit family protein_coding GLUTAMATE RECEPTOR 2.8 (GLR2.8) GLUTAMATE RECEPTOR 2.8 (ATGLR2.8);GLUTAMATE RECEPTOR 2.8 (GLR2.8); (GLR2.8)	FALSE	1	Cortex	brown	Leaf
Gm07_40840782	Medians_FarmCPU	total_root_length	7.31e-09	40840781	40840783	Glyma.07G226333	Gm07	40672371	40675876	-	-164906		AT1G69340		appr-1-p_processing_enzyme_family_protein	appr-1-p processing enzyme family protein;(source:Araport11) protein_coding	FALSE			blue	Leaf
Gm09_7681193	Medians_FarmCPU	total_root_length	8.98e-09	7681192	7681194	Glyma.09G073300	Gm09	7681253	7684704	+	59	GO:0009733	AT3G43120		SAUR-like_auxin-responsive_protein_family_	SAUR-like auxin-responsive protein family;(source:Araport11) protein_coding SMALL AUXIN UPREGULATED RNA 39 (SAUR39) SMALL AUXIN UPREGULATED RNA 39 (SAUR39)	FALSE	9	Cortex, Pericycle, Vascular bundle/Xylem pole pericycle, Stele, Epidermis, Xylem, Vascular bundle, Metaphloem, Cluster13	plum1	Unassigned
Gm09_7681193	Medians_FarmCPU	total_root_length	8.98e-09	7681192	7681194	Glyma.09G073400	Gm09	7690519	7691112	-	9325	GO:0009733	AT1G72430		SAUR-like_auxin-responsive_protein_family_	SAUR-like auxin-responsive protein family;(source:Araport11) protein_coding SMALL AUXIN UPREGULATED RNA 78 (SAUR78) SMALL AUXIN UPREGULATED RNA 78 (SAUR78)	TRUE	6	Cortex, Pericycle, Stele, Endodermis, Epidermis, Xylem	turquoise	Root
Gm09_7681193	Medians_FarmCPU	total_root_length	8.98e-09	7681192	7681194	Glyma.09G073200	Gm09	7655776	7667087	-	-14106	GO:0055114;GO:0016491;GO:0050664;GO:0004601	AT1G19230		Riboflavin_synthase-like_superfamily_protein	Riboflavin synthase-like superfamily protein;(source:Araport11) protein_coding (ATRBOHE) (ATRBOHE)	TRUE	10	Cortex, Pericycle, Vascular bundle/Xylem pole pericycle, Stele, Endodermis, Epidermis, Xylem, Vascular bundle, Metaphloem, Cluster13	turquoise	Root
Gm09_7681193	Medians_FarmCPU	total_root_length	8.98e-09	7681192	7681194	Glyma.09G073050	Gm09	7608884	7609974	-	-71219		AT3G43110			transmembrane protein;(source:Araport11) protein_coding	FALSE	4	Cortex, Pericycle, Vascular bundle/Xylem pole pericycle, Endodermis	brown	Leaf
Gm09_7681193	Medians_FarmCPU	total_root_length	8.98e-09	7681192	7681194	Glyma.09G072900	Gm09	7603500	7604473	+	-76720		AT4G02210			Myb/SANT-like DNA-binding domain protein;(source:Araport11) protein_coding	FALSE	0		turquoise	Root
Gm09_7681193	Medians_FarmCPU	total_root_length	8.98e-09	7681192	7681194	Glyma.09G073600	Gm09	7767379	7774552	-	86185	GO:0016157;GO:0005985	AT3G43190	ATSUS4;SUS4	sucrose_synthase_4	Encodes a protein with sucrose synthase activity (SUS4). protein_coding SUCROSE SYNTHASE 4 (SUS4) ARABIDOPSIS THALIANA SUCROSE SYNTHASE 4 (ATSUS4);SUCROSE SYNTHASE 4 (SUS4)	FALSE	10	Cortex, Pericycle, Vascular bundle/Xylem pole pericycle, Stele, Endodermis, Epidermis, Xylem, Vascular bundle, Metaphloem, Cluster13	yellow	Root
Gm09_7681193	Medians_FarmCPU	total_root_length	8.98e-09	7681192	7681194	Glyma.09G072800	Gm09	7591575	7592427	-	-88766						TRUE	3	Cortex, Stele, Epidermis	turquoise	Root
Gm09_7681193	Medians_FarmCPU	total_root_length	8.98e-09	7681192	7681194	Glyma.09G072700	Gm09	7577275	7578310	-	-102883	GO:0004857	AT5G20740		Plant_invertase/pectin_methylesterase_inhibitor_superfamily_protein	Plant invertase/pectin methylesterase inhibitor superfamily protein;(source:Araport11) protein_coding	FALSE	9	Cortex, Pericycle, Vascular bundle/Xylem pole pericycle, Stele, Endodermis, Epidermis, Xylem, Metaphloem, Cluster13	red	Meristem
Gm09_7681193	Medians_FarmCPU	total_root_length	8.98e-09	7681192	7681194	Glyma.09G073700	Gm09	7821237	7838093	-	140043	GO:0042578	AT3G43220		Phosphoinositide_phosphatase_family_protein	Phosphoinositide phosphatase family protein;(source:Araport11) protein_coding SUPPRESSOR OF ACTIN 3 (SAC3) SUPPRESSOR OF ACTIN 3 (SAC3)	FALSE	10	Cortex, Pericycle, Vascular bundle/Xylem pole pericycle, Stele, Endodermis, Epidermis, Xylem, Vascular bundle, Metaphloem, Cluster13	blue	Leaf
Gm09_7681193	Medians_FarmCPU	total_root_length	8.98e-09	7681192	7681194	Glyma.09G072500	Gm09	7492994	7498606	-	-182587	GO:0006468;GO:0004672	AT1G52310		protein_kinase_family_protein_/_C-type_lectin_domain-containing_protein	protein kinase family protein / C-type lectin domain-containing protein;(source:Araport11) protein_coding	FALSE	9	Cortex, Pericycle, Vascular bundle/Xylem pole pericycle, Stele, Endodermis, Epidermis, Xylem, Vascular bundle, Cluster13	turquoise	Root
Gm09_7681193	Medians_FarmCPU	total_root_length	8.98e-09	7681192	7681194	Glyma.09G072451	Gm09	7491370	7491486	+	-189707						FALSE
Gm09_7681193	Medians_FarmCPU	total_root_length	8.98e-09	7681192	7681194	Glyma.09G073900	Gm09	7879023	7879959	-	197829	GO:0016020;GO:0015979;GO:0009523	AT2G06520	PSBX	photosystem_II_subunit_X	Encodes a protein with sequence similarity to the spinach photosystem II subunit PsbX. protein_coding PHOTOSYSTEM II SUBUNIT X (PSBX) PHOTOSYSTEM II SUBUNIT X (PSBX)	FALSE	6	Cortex, Pericycle, Vascular bundle/Xylem pole pericycle, Endodermis, Epidermis, Cluster13	turquoise	Root
Gm09_7681193	Medians_FarmCPU	total_root_length	8.98e-09	7681192	7681194	Glyma.09G072400	Gm09	7474225	7481113	-	-200080	GO:0016787;GO:0005524;GO:0003677	AT2G40700		P-loop_containing_nucleoside_triphosphate_hydrolases_superfamily_protein	DEAD-box helicase family protein. Overexpression confers tolerance to salt stress. protein_coding RNA HELICASE 17 (RH17) RNA HELICASE 17 (RH17)	FALSE	10	Cortex, Pericycle, Vascular bundle/Xylem pole pericycle, Stele, Endodermis, Epidermis, Xylem, Vascular bundle, Metaphloem, Cluster13	blue	Leaf
Gm09_7681193	Medians_FarmCPU	total_root_length	8.98e-09	7681192	7681194	Glyma.09G074000	Gm09	7882639	7885341	-	201445	GO:0016788	AT1G53920	GLIP5	GDSL-motif_lipase_5	Contains lipase signature motif and GDSL domain. protein_coding GDSL-MOTIF LIPASE 5 (GLIP5) GDSL-MOTIF LIPASE 5 (GLIP5)	FALSE	0		lightpink4	Unassigned
Gm09_7681193	Medians_FarmCPU	total_root_length	8.98e-09	7681192	7681194	Glyma.09G072300	Gm09	7471036	7471646	+	-209547						FALSE	1	Stele
Gm09_7681193	Medians_FarmCPU	total_root_length	8.98e-09	7681192	7681194	Glyma.09G074100	Gm09	7901525	7906940	+	220331	GO:0005634	AT2G26460	SMU2	RED_family_protein	Encodes SMU2, a protein involved in RNA splicing. protein_coding SUPPRESSORS OF MEC-8 AND UNC-52 2 (SMU2) SUPPRESSORS OF MEC-8 AND UNC-52 2 (SMU2)	FALSE	10	Cortex, Pericycle, Vascular bundle/Xylem pole pericycle, Stele, Endodermis, Epidermis, Xylem, Vascular bundle, Metaphloem, Cluster13	blue	Leaf
Gm09_7681193	Medians_FarmCPU	total_root_length	8.98e-09	7681192	7681194	Glyma.09G072200	Gm09	7436392	7445095	-	-236098	GO:0006355;GO:0005634;GO:0003677;GO:0009725	AT5G20730	ARF7;BIP;IAA21;IAA23;IAA25;MSG1;NPH4;TIR5	Transcriptional_factor_B3_family_protein_/_auxin-responsive_factor_AUX/IAA-related	Encodes an auxin-regulated transcriptional activator. Activates expression of IAA1 and IAA9 in the presence of auxin. Mutants affect blue light and gravitropic and auxin mediated growth responses. Together with AUX19, it is involved in the response to ethylene. In the arf7 arf19 double mutant, several auxin-responsive genes (e.g. IAA5, LBD16, LBD29 and LBD33) are no longer upregulated by auxin. p…	FALSE	10	Cortex, Pericycle, Vascular bundle/Xylem pole pericycle, Stele, Endodermis, Epidermis, Xylem, Vascular bundle, Metaphloem, Cluster13	turquoise	Root
Gm09_7681193	Medians_FarmCPU	total_root_length	8.98e-09	7681192	7681194	Glyma.09G072100	Gm09	7421903	7425385	+	-255808	GO:0006457;GO:0005737	AT5G20720	ATCPN21;CHCPN10;CPN10;CPN20;CPN21	chaperonin_20	Encodes a chloroplast co-chaperonin with similarity to CPN21 from spinach, E.coli GroES. protein_coding CHAPERONIN 20 (CPN20) CHAPERONIN 20 (CPN20);CHLOROPLAST CHAPERONIN 10 (CPN10); (CPN21); (ATCPN21);CHLOROPLAST CHAPERONIN 10 (CHCPN10)	FALSE	10	Cortex, Pericycle, Vascular bundle/Xylem pole pericycle, Stele, Endodermis, Epidermis, Xylem, Vascular bundle, Metaphloem, Cluster13	turquoise	Root
Gm09_7681193	Medians_FarmCPU	total_root_length	8.98e-09	7681192	7681194	Glyma.09G074200	Gm09	7937200	7939795	+	256006	GO:0046872;GO:0016567;GO:0004842	AT3G53690		RING/U-box_superfamily_protein	RING/U-box superfamily protein;(source:Araport11) protein_coding	TRUE	8	Cortex, Vascular bundle/Xylem pole pericycle, Stele, Endodermis, Epidermis, Xylem, Vascular bundle, Cluster13	turquoise	Root
Gm09_7681193	Medians_FarmCPU	total_root_length	8.98e-09	7681192	7681194	Glyma.09G074300	Gm09	7951609	7960328	-	270415	GO:0003677	AT3G43240		ARID/BRIGHT_DNA-binding_domain-containing_protein	Interacts with CHR11, CHR17, and RTL1, several known subunits of ISWI. JA biosynthesisis is positively regulated by this chromatin remodeling complex, thereby promoting stamen filament elongation. protein_coding AT-RICH INTERACTING DOMAIN5 (ARID5) AT-RICH INTERACTING DOMAIN5 (ARID5)	TRUE	10	Cortex, Pericycle, Vascular bundle/Xylem pole pericycle, Stele, Endodermis, Epidermis, Xylem, Vascular bundle, Metaphloem, Cluster13	turquoise	Root
Gm10_31904370	Medians_FarmCPU	total_root_length	6.05e-09	31904369	31904371	Glyma.10G122800	Gm10	31858739	31858999	+	-45371						FALSE			brown	Leaf
Gm10_31904370	Medians_FarmCPU	total_root_length	6.05e-09	31904369	31904371	Glyma.10G123000	Gm10	31966784	31969160	+	62413	GO:0055114;GO:0016491	AT1G30040	ATGA2OX2;GA2OX2	gibberellin_2-oxidase	Encodes a gibberellin 2-oxidase that acts on C-19 gibberellins. AtGA2OX2 expression is responsive to cytokinin and KNOX activities. protein_coding GIBBERELLIN 2-OXIDASE (GA2OX2) GIBBERELLIN 2-OXIDASE (ATGA2OX2);GIBBERELLIN 2-OXIDASE (GA2OX2);GIBBERELLIN 2-OXIDASE 2 (GA2OX2)	FALSE	0		brown	Leaf
Gm10_31904370	Medians_FarmCPU	total_root_length	6.05e-09	31904369	31904371	Glyma.10G122700	Gm10	31819974	31820323	-	-84047		AT2G36985	DVL16;ROT4	DVL_family_protein	Encodes ROTUNDIFOLIA4, a member of the seed plant-specific family of small peptides, RTFL (ROT FOUR LIKE), characterised by the presence of a 29-amino acid domain: RTF. Expressed in shoot apices, young leaves and flowers. Involved in controlling polarity-dependent cell proliferation. protein_coding ROTUNDIFOLIA4 (ROT4) DEVIL 16 (DVL16);ROTUNDIFOLIA4 (ROT4)	FALSE	0		purple	Hypocotyl
Gm13_20459886	Medians_FarmCPU	total_root_length	3.2e-12	20459885	20459887	Glyma.13G099300	Gm13	20458023	20466576	-	0	GO:0003723	AT3G20250	APUM5;PUM5	pumilio_5	Encodes a member of the Arabidopsis Pumilio (APUM) proteins containing PUF domain (eight repeats of approximately 36 amino acids each). PUF proteins regulate both mRNA stability and translation through sequence-specific binding to the 3 UTR of target mRNA transcripts. APUM5 is involved in susceptibility to CMV and is not required for bacterial or fungal pathogen resistance although its expression…	FALSE	10	Cortex, Pericycle, Vascular bundle/Xylem pole pericycle, Stele, Endodermis, Epidermis, Xylem, Vascular bundle, Metaphloem, Cluster13	blue	Leaf
Gm13_20459886	Medians_FarmCPU	total_root_length	3.2e-12	20459885	20459887	Glyma.13G099200	Gm13	20453915	20457341	+	-2545	GO:0008168;GO:0008152	AT5G57280		S-adenosyl-L-methionine-dependent_methyltransferases_superfamily_protein	Gene encodes a methyltransferase-like protein involved in pre-rRNA processing. protein_coding ROOT INITIATION DEFECTIVE 2 (RID2)	FALSE	9	Cortex, Pericycle, Vascular bundle/Xylem pole pericycle, Stele, Endodermis, Epidermis, Xylem, Vascular bundle, Cluster13	turquoise	Root
Gm13_20459886	Medians_FarmCPU	total_root_length	3.2e-12	20459885	20459887	Glyma.13G099400	Gm13	20468691	20471578	+	8804		AT2G19080		metaxin-related	metaxin-like protein;(source:Araport11) protein_coding	FALSE	8	Cortex, Pericycle, Vascular bundle/Xylem pole pericycle, Stele, Endodermis, Epidermis, Xylem, Vascular bundle	turquoise	Root
Gm13_20459886	Medians_FarmCPU	total_root_length	3.2e-12	20459885	20459887	Glyma.13G099500	Gm13	20473419	20478262	-	13532		AT4G30130		Protein_of_unknown_function_(DUF630_and_DUF632)	DUF630 family protein (DUF630 and DUF632);(source:Araport11) protein_coding	FALSE	9	Cortex, Pericycle, Vascular bundle/Xylem pole pericycle, Stele, Endodermis, Epidermis, Xylem, Metaphloem, Cluster13	green	Meristem
Gm13_20459886	Medians_FarmCPU	total_root_length	3.2e-12	20459885	20459887	Glyma.13G099150	Gm13	20444908	20445150	+	-14736						FALSE			grey	Leaf
Gm13_20459886	Medians_FarmCPU	total_root_length	3.2e-12	20459885	20459887	Glyma.13G099100	Gm13	20442449	20443209	+	-16677						TRUE	7	Cortex, Pericycle, Vascular bundle/Xylem pole pericycle, Stele, Endodermis, Epidermis, Xylem	turquoise	Root
Gm13_20459886	Medians_FarmCPU	total_root_length	3.2e-12	20459885	20459887	Glyma.13G099002	Gm13	20435980	20442448	+	-17438		AT1G04390		BTB/POZ_domain-containing_protein	BTB/POZ domain-containing protein;(source:Araport11) protein_coding	FALSE	9	Cortex, Pericycle, Vascular bundle/Xylem pole pericycle, Stele, Endodermis, Epidermis, Xylem, Vascular bundle, Cluster13	brown	Leaf
Gm13_20459886	Medians_FarmCPU	total_root_length	3.2e-12	20459885	20459887	Glyma.13G098900	Gm13	20430265	20430778	+	-29108						TRUE			turquoise	Root
Gm13_20459886	Medians_FarmCPU	total_root_length	3.2e-12	20459885	20459887	Glyma.13G098800	Gm13	20429201	20429719	+	-30167		AT1G04390		BTB/POZ_domain-containing_protein	BTB/POZ domain-containing protein;(source:Araport11) protein_coding	FALSE			blue	Leaf
Gm13_20459886	Medians_FarmCPU	total_root_length	3.2e-12	20459885	20459887	Glyma.13G098700	Gm13	20427838	20428418	+	-31468						FALSE			yellow	Root
Gm13_20459886	Medians_FarmCPU	total_root_length	3.2e-12	20459885	20459887	Glyma.13G099600	Gm13	20504214	20514568	+	44327	GO:0046872;GO:0000166	AT4G30110	ATHMA2;HMA2	heavy_metal_atpase_2	encodes a protein similar to Zn-ATPase, a P1B-type ATPases transport zinc protein_coding HEAVY METAL ATPASE 2 (HMA2) HEAVY METAL ATPASE 2 (HMA2);ARABIDOPSIS HEAVY METAL ATPASE 2 (ATHMA2)	TRUE	10	Cortex, Pericycle, Vascular bundle/Xylem pole pericycle, Stele, Endodermis, Epidermis, Xylem, Vascular bundle, Metaphloem, Cluster13	turquoise	Root
Gm13_20459886	Medians_FarmCPU	total_root_length	3.2e-12	20459885	20459887	Glyma.13G098600	Gm13	20397963	20409056	-	-50830	GO:0007010;GO:0003779	AT4G30160	ATVLN4;VLN4	villin_4	Encodes a major actin filament bundling protein that is involved in root hair growth through regulating actin organization in a Ca2+-dependent manner. protein_coding VILLIN 4 (VLN4) VILLIN 4 (VLN4)	FALSE	1	Stele	brown	Leaf
Gm13_20459886	Medians_FarmCPU	total_root_length	3.2e-12	20459885	20459887	Glyma.13G098500	Gm13	20388793	20396473	-	-63413	GO:0016853;GO:0005975	AT5G57330		Galactose_mutarotase-like_superfamily_protein	Galactose mutarotase-like superfamily protein;(source:Araport11) protein_coding	FALSE	10	Cortex, Pericycle, Vascular bundle/Xylem pole pericycle, Stele, Endodermis, Epidermis, Xylem, Vascular bundle, Metaphloem, Cluster13	blue	Leaf
Gm13_20459886	Medians_FarmCPU	total_root_length	3.2e-12	20459885	20459887	Glyma.13G099650	Gm13	20531596	20532759	+	71709						FALSE	0		floralwhite	Unassigned
Gm13_20459886	Medians_FarmCPU	total_root_length	3.2e-12	20459885	20459887	Glyma.13G099700	Gm13	20533617	20540845	-	73730	GO:0016020;GO:0008375	AT2G19160		Core-2/I-branching_beta-1;6-N-acetylglucosaminyltransferase_family_protein	Core-2/I-branching beta-1,6-N-acetylglucosaminyltransferase family protein;(source:Araport11) protein_coding	FALSE	10	Cortex, Pericycle, Vascular bundle/Xylem pole pericycle, Stele, Endodermis, Epidermis, Xylem, Vascular bundle, Metaphloem, Cluster13	turquoise	Root
Gm13_20459886	Medians_FarmCPU	total_root_length	3.2e-12	20459885	20459887	Glyma.13G098400	Gm13	20379678	20381918	-	-77968	GO:0055114;GO:0020037;GO:0006979;GO:0004601	AT2G18980		Peroxidase_superfamily_protein	Class III peroxidase cell wall-targeted protein localized to the micropylar endosperm facing the radicle. Involved in seed germination. protein_coding (PRX16) (PRX16)	TRUE	4	Cortex, Endodermis, Epidermis, Vascular bundle	turquoise	Root
Gm13_20459886	Medians_FarmCPU	total_root_length	3.2e-12	20459885	20459887	Glyma.13G098200	Gm13	20374559	20377510	+	-82376		AT5G57340			ras guanine nucleotide exchange factor Q-like protein;(source:Araport11) protein_coding	FALSE	9	Cortex, Pericycle, Vascular bundle/Xylem pole pericycle, Stele, Endodermis, Epidermis, Xylem, Vascular bundle, Cluster13	blue	Leaf
Gm13_20459886	Medians_FarmCPU	total_root_length	3.2e-12	20459885	20459887	Glyma.13G098300	Gm13	20375495	20375890	+	-83996						FALSE	5	Cortex, Vascular bundle/Xylem pole pericycle, Stele, Endodermis, Epidermis	grey	Leaf
Gm13_20459886	Medians_FarmCPU	total_root_length	3.2e-12	20459885	20459887	Glyma.13G099800	Gm13	20554648	20555627	+	94761		AT5G66580			PADRE protein. protein_coding	TRUE	7	Cortex, Pericycle, Vascular bundle/Xylem pole pericycle, Stele, Endodermis, Epidermis, Xylem	turquoise	Root
Gm13_20459886	Medians_FarmCPU	total_root_length	3.2e-12	20459885	20459887	Glyma.13G098100	Gm13	20362049	20364213	+	-95673		AT5G57345			OXR is a single copy gene in Arabidopsis. It is localized to the ER. It is expressed throughout the plant and expression is induced in response to abiotic stress. While the function of OXR is unknown, overexpression results in increased abiotic stress tolerance and increased ascorbic acid content. protein_coding (ATOXR) (ATOXR)	FALSE	8	Cortex, Pericycle, Vascular bundle/Xylem pole pericycle, Stele, Endodermis, Epidermis, Xylem, Metaphloem	turquoise	Root
Gm14_25947501	Medians_FarmCPU	total_root_length	7.17e-11	25947500	25947502	Glyma.14G144700	Gm14	26007404	26014946	-	59902		AT1G10010	AAP8;ATAAP8	amino_acid_permease_8	Encodes a high affinity amino acid transporter that is probably responsible for import of organic nitrogen into developing seeds. One of eight gene family members that encode amino acid permeases. Most closely related to AAP1 (75%) identity. protein_coding AMINO ACID PERMEASE 8 (AAP8) AMINO ACID PERMEASE 8 (AAP8); (ATAAP8)	TRUE	10	Cortex, Pericycle, Vascular bundle/Xylem pole pericycle, Stele, Endodermis, Epidermis, Xylem, Vascular bundle, Metaphloem, Cluster13	turquoise	Root
Gm14_25947501	Medians_FarmCPU	total_root_length	7.17e-11	25947500	25947502	Glyma.14G145000	Gm14	26121981	26138212	+	174479		AT2G40600		appr-1-p_processing_enzyme_family_protein	appr-1-p processing enzyme family protein;(source:Araport11) protein_coding	FALSE	10	Cortex, Pericycle, Vascular bundle/Xylem pole pericycle, Stele, Endodermis, Epidermis, Xylem, Vascular bundle, Metaphloem, Cluster13	turquoise	Root
Gm14_25947501	Medians_FarmCPU	total_root_length	7.17e-11	25947500	25947502	Glyma.14G145100	Gm14	26125661	26128152	-	178159		AT3G17450		hAT_dimerisation_domain-containing_protein	hAT dimerization domain-containing protein;(source:Araport11) protein_coding	FALSE			blue	Leaf
Gm14_25947501	Medians_FarmCPU	total_root_length	7.17e-11	25947500	25947502	Glyma.14G145200	Gm14	26159092	26162928	-	211590	GO:0016987;GO:0006355;GO:0006352;GO:0003700;GO:0003677	AT3G53920	SIG3;SIGC	RNApolymerase_sigma-subunit_C	Encodes a sigma-like transcription factor, Sigma 3 (SIG3 or SIGC). As a subunit of chloroplast RNA polymerase, SIG3 confers the ability to recognize promoter sequences on the core enzyme. SIG3 transcribes specifically the psbN gene in plastids. protein_coding RNAPOLYMERASE SIGMA-SUBUNIT C (SIGC) SIGMA FACTOR 3 (SIG3);RNAPOLYMERASE SIGMA-SUBUNIT C (SIGC)	FALSE			blue	Leaf
Gm14_25947501	Medians_FarmCPU	total_root_length	7.17e-11	25947500	25947502	Glyma.14G145251	Gm14	26159372	26159566	-	211870						FALSE			blue	Leaf
Gm14_25947501	Medians_FarmCPU	total_root_length	7.17e-11	25947500	25947502	Glyma.14G144400	Gm14	25732856	25734363	-	-213138		AT1G10010	AAP8;ATAAP8	amino_acid_permease_8	Encodes a high affinity amino acid transporter that is probably responsible for import of organic nitrogen into developing seeds. One of eight gene family members that encode amino acid permeases. Most closely related to AAP1 (75%) identity. protein_coding AMINO ACID PERMEASE 8 (AAP8) AMINO ACID PERMEASE 8 (AAP8); (ATAAP8)	FALSE			darkseagreen4	Unassigned

## Sheet: S6
Supplementary Table S6. GWAS Candidate (GC) Genes with Syntenic Arabidopsis Orthologs and Functional Annotations.
Model Trait	GWAS SNP	Feature	Gene ID	Module	Arabidopsis syntenic ortholog	Arabidopsis description	Soybean annotation
Medians_Blink.Dry_root_mass	Gm09_47116003	3' UTR	Glyma.09G245000	black	AT2G44710	RNA-binding (RRM/RBD/RNP motifs)	RNA recognition motif
Medians_FarmCPU.pr_tip_depth	Gm20_2062349	5' UTR	Glyma.20G019967	red	NA	NA	Mannosyltransferase involved in glycosylphosphatidylinositol-anchor biosynthesis
Medians_FarmCPU.pr_tip_depth	Gm02_15770618	coding	Glyma.02G149100	yellow	AT3G63080	GPX4; Encodes glutathione peroxidase	Belongs to the glutathione peroxidase family
Medians_FarmCPU.Convex_hull_area	Gm06_41838269	coding	Glyma.06G250600	grey	NA	NA	Myb/SANT-like DNA-binding domain
Medians_FarmCPU.total_root_length	Gm06_41838269	coding	Glyma.06G250600	grey	NA	NA	Myb/SANT-like DNA-binding domain
Medians_FarmCPU.Convex_hull_area	Gm08_43556802	coding	Glyma.08G323200	turquoise	NA	NA	Belongs to the disease resistance NB-LRR family
Medians_Blink.Convex_hull_area	Gm10_45938997	coding	Glyma.10G228200	grey	NA	NA	LRR receptor-like serine threonine-protein kinase
Medians_FarmCPU.Convex_hull_area	Gm11_4760258	coding	Glyma.11G062900	yellow	NA	CHC1; AT3G11130	Clathrin is the major protein of the polyhedral coat of coated pits and vesicles
Medians_FarmCPU.pr_tip_depth	Gm15_10024740	coding	Glyma.15G127100	turquoise	NA	NA	Belongs to the disease resistance NB-LRR family
Medians_FarmCPU.Biomass_area	Gm02_38012571	Intron	Glyma.02G191500	brown	NA	FPGS2;AT5G05980	DIHYDROFOLATE SYNTHETASE FOLYLPOLYGLUTAMATE SYNTHETASE (DHFS-FPGS) homolog C
Medians_Blink.pr_tip_depth	Gm18_51895181	Intron	Glyma.18G226850	brown	NA	NA	disease resistance
Medians_FarmCPU.total_root_length	Gm13_20459886	Intron, 3' UTR	Glyma.13G099300	Blue	AT4G25880	PUM6; Encodes a member of the Arabidopsis Pumilio (APUM) proteins containing PUF domain	Pumilio homolog 6

## Sheet: S7
Supplementary Table S7. Significant GWAS SNPs Outside Gene Models
SNP	Model	Trait	Chromosome	Position	P.value	maf:minor allele frequency	n observations	FDR_Adjusted_P-values	effect size
Gm01_14659420	Medians_FarmCPU	lr_length	GM01	14659420	1.85e-11	0.412399	371	2.97e-05	0.553299
Gm01_16605694	Medians_FarmCPU	lr_length	GM01	16605694	4.08e-09	0.318059	371	0.00491489	0.49561
Gm02_5521177	Medians_FarmCPU	Depth	GM02	5521177	1.74e-09	0.277628	371	0.00167807	-0.306198
Gm02_15770618	Medians_FarmCPU	pr_tip_depth	GM02	15770618	1.01e-09	0.154987	371	0.000696791	-0.270478
Gm02_23961034	Medians_FarmCPU	total_root_length	GM02	23961034	3.48e-09	0.216981	371	0.00335464	0.39683
Gm02_25515820	Medians_FarmCPU	pr_tip_depth	GM02	25515820	1.26e-14	0.203504	371	3.03e-08	0.415124
Gm02_37649943	Medians_FarmCPU	Depth	GM02	37649943	2.2e-10	0.184636	371	0.00026429	0.478507
Gm02_38012571	Medians_FarmCPU	Biomass_area	GM02	38012571	1.44e-09	0.25876	371	0.00173722	0.554817
Gm02_45524181	Medians_Blink	pr_tip_depth	GM02	45524181	4.91e-15	0.15903	371	2.36e-08	0.750879
Gm03_38698646	Medians_FarmCPU	Convex_hull_area	GM03	38698646	7.08e-17	0.265499	371	3.41e-10	0.476806
Gm04_29977360	Medians_FarmCPU	pr_tip_depth	GM04	29977360	5.52e-09	0.30593	371	0.00265965	-0.369223
Gm05_7256807	Medians_FarmCPU	lr_length	GM05	7256807	3.81e-16	0.327493	371	1.83e-09	-0.823127
Gm05_24611593	Medians_FarmCPU	lr_length	GM05	24611593	5.25e-14	0.351752	371	1.26e-07	-0.565351
Gm06_17855981	Medians_Blink	Biomass_area	GM06	17855981	3.72e-11	0.322102	371	8.96e-05	0.235648
Gm06_17855981	Medians_FarmCPU	Biomass_area	GM06	17855981	7.77e-10	0.322102	371	0.00124678	0.235648
Gm06_35340939	Medians_Blink	pr_tip_depth	GM06	35340939	6.32e-09	0.198113	371	0.00507004	-0.319144
Gm06_41838269	Medians_FarmCPU	Convex_hull_area	GM06	41838269	4.09e-10	0.179245	371	0.000492024	-0.474551
Gm06_41838269	Medians_FarmCPU	total_root_length	GM06	41838269	8.89e-10	0.179245	371	0.00107028	-0.474551
Gm06_42199048	Medians_FarmCPU	total_root_length	GM06	42199048	4.31e-21	0.206199	371	2.07e-14	0.917031
Gm06_42308843	Medians_FarmCPU	Depth	GM06	42308843	9.68e-11	0.300539	371	0.000233137	-0.399679
Gm06_42308843	Medians_FarmCPU	pr_tip_depth	GM06	42308843	3.53e-15	0.300539	371	1.7e-08	-0.399679
Gm07_35512631	Medians_Blink	pr_tip_depth	GM07	35512631	5.31e-09	0.188679	371	0.00507004	0.360584
Gm07_35512631	Medians_FarmCPU	pr_tip_depth	GM07	35512631	2.8e-09	0.188679	371	0.0016856	0.360584
Gm07_40840782	Medians_FarmCPU	total_root_length	GM07	40840782	7.31e-09	0.125337	371	0.00503223	-0.379461
Gm07_44928572	Medians_Blink	pr_tip_depth	GM07	44928572	6.49e-10	0.358491	371	0.00104114	-0.518033
Gm08_43556802	Medians_FarmCPU	Convex_hull_area	GM08	43556802	2.96e-10	0.285714	371	0.000475511	-0.34191
Gm09_7083962	Medians_Blink	lr_length	GM09	7083962	1.1e-09	0.221024	371	0.00527879	-0.50294
Gm09_7681193	Medians_FarmCPU	total_root_length	GM09	7681193	8.98e-09	0.206199	371	0.00540381	-0.293943
Gm09_17696953	Medians_Blink	pr_tip_depth	GM09	17696953	4.36e-12	0.345013	371	1.05e-05	0.743282
Gm09_22884486	Medians_FarmCPU	Biomass_area	GM09	22884486	1.23e-10	0.24124	371	0.00029621	0.474208
Gm09_22884486	Medians_FarmCPU	Convex_hull_area	GM09	22884486	6.33e-09	0.24124	371	0.00508301	0.474208
Gm09_26894819	Medians_FarmCPU	Biomass_area	GM09	26894819	1.11e-14	0.355795	371	5.34e-08	0.485657
Gm09_47116003	Medians_Blink	Dry_root_mass	GM09	47116003	8.09e-11	0.12938	371	0.000389475	0.512098
Gm10_11766051	Medians_FarmCPU	pr_tip_depth	GM10	11766051	2.02e-11	0.196765	371	1.95e-05	0.452208
Gm10_31904370	Medians_FarmCPU	total_root_length	GM10	31904370	6.05e-09	0.0714286	371	0.0048565	0.531817
Gm10_45938997	Medians_Blink	Convex_hull_area	GM10	45938997	4.42e-09	0.17655	371	0.0213037	-0.695091
Gm11_4760258	Medians_FarmCPU	Convex_hull_area	GM11	4760258	4.53e-12	0.336927	371	1.09e-05	-0.589878
Gm11_31034808	Medians_Blink	Width	GM11	31034808	9.4e-09	0.184636	371	0.0327528	0.513214
Gm12_12060674	Medians_FarmCPU	Depth	GM12	12060674	6.99e-09	0.188679	371	0.0056106	-0.447573
Gm12_13953189	Medians_FarmCPU	pr_tip_depth	GM12	13953189	2.75e-14	0.27628	371	4.41e-08	0.464854
Gm12_26099549	Medians_Blink	pr_length	GM12	26099549	2.34e-11	0.167116	371	0.000112776	-0.626749
Gm13_20459886	Medians_FarmCPU	total_root_length	GM13	20459886	3.2e-12	0.25876	371	7.71e-06	0.490762
Gm14_19669054	Medians_FarmCPU	Depth	GM14	19669054	5.82e-19	0.386792	371	2.8e-12	0.525558
Gm14_22180278	Medians_FarmCPU	Convex_hull_area	GM14	22180278	3.06e-09	0.231806	371	0.00295197	0.416569
Gm14_25947501	Medians_FarmCPU	total_root_length	GM14	25947501	7.17e-11	0.123989	371	0.000115077	-0.348003
Gm14_38117630	Medians_FarmCPU	Biomass_area	GM14	38117630	2.75e-09	0.219677	371	0.0022709	0.399366
Gm15_10024740	Medians_FarmCPU	pr_tip_depth	GM15	10024740	4.88e-10	0.260108	371	0.00039131	0.386483
Gm15_45526543	Medians_FarmCPU	pr_tip_depth	GM15	45526543	5.48e-13	0.432615	371	6.6e-07	0.338419
Gm18_17125731	Medians_FarmCPU	Depth	GM18	17125731	1.53e-10	0.204852	371	0.000245976	-0.52832
Gm18_51895181	Medians_Blink	pr_tip_depth	GM18	51895181	8.73e-10	0.216981	371	0.0010511	-0.407403
Gm19_28102691	Medians_FarmCPU	Biomass_area	GM19	28102691	2.83e-09	0.362534	371	0.0022709	0.205344
Gm19_36670574	Medians_Blink	Biomass_area	GM19	36670574	9.25e-14	0.336927	371	4.46e-07	0.465673
Gm20_2062349	Medians_FarmCPU	pr_tip_depth	GM20	2062349	3.45e-09	0.40566	371	0.00184696	0.177328
Gm20_17925110	Medians_FarmCPU	Biomass_area	GM20	17925110	8.14e-09	0.245283	371	0.00559823	-0.398138

## Sheet: S8
Supplementary Table S8. Genomic Regions Containing SNP Hotspots for RSA Traits.
Chromosome	Position	Trait
Chr2	37649943	Medians_FarmCPU.Depth
Chr2	38012571	Medians_FarmCPU.Biomass_area
Chr6	41838269	Medians_FarmCPU.Convex_hull_area
Chr6	41838269	Medians_FarmCPU.total_root_length
Chr6	42199048	Medians_FarmCPU.total_root_length
Chr6	42308843	Medians_FarmCPU.Depth
Chr6	42308843	Medians_FarmCPU.pr_tip_depth

## Sheet: S9
Supplementary Table S9: Metadata for Williams82 Bulk RNA-Seq Samples.
sample_ID	Genotype	Tissue	Replicate	dev_stage
SRR12744721	Williams82	hypocotyl	1	VC stage
SRR12744738	Williams82	meristem	2	VC stage
SRR12744744	Williams82	root	3	VC stage
SRR12744745	Williams82	root	4	VC stage
SRR12744746	Williams82	root	5	VC stage
SRR12744747	Williams82	hypocotyl	6	VC stage
SRR12744748	Williams82	hypocotyl	7	VC stage
SRR12744749	Williams82	meristem	8	VC stage
SRR12744750	Williams82	meristem	9	VC stage
SRR7239882	Williams 82	leaf	10	V2 stage
SRR7239883	Williams 82	leaf	11	V2 stage
SRR7239884	Williams 82	leaf	12	V2 stage
SRR7239885	Williams 82	leaf	13	V2 stage
SRR7239886	Williams 82	leaf	14	V2 stage
SRR7239887	Williams 82	leaf	15	V2 stage
SRR9995602	Williams 82	root	16	15 days
SRR9995603	Williams 82	root	17	15 days
SRR9995604	Williams 82	root	18	15 days
SRR9995605	Williams 82	root	19	25 days
SRR9995608	Williams 82	root	20	39 days
SRR9995609	Williams 82	root	21	39 days
SRR9995610	Williams 82	root	22	39 days
SRR17626132	Willams 82	leaf	23	35 days
SRR17626133	Willams 82	leaf	24	35 days
SRR17626134	Willams 82	leaf	25	35 days
SRR17626135	Willams 82	leaf	26	35 days
SRR17626136	Willams 82	leaf	27	35 days
SRR17626137	Willams 82	leaf	28	35 days
SRR17626138	Willams 82	leaf	29	35 days
SRR17626139	Willams 82	leaf	30	35 days
SRR17626140	Willams 82	leaf	31	35 days
SRR17626141	Willams 82	leaf	32	35 days
SRR17626142	Willams 82	leaf	33	35 days
SRR17626143	Willams 82	leaf	34	35 days
SRR15311247	Williams82	root	35	7days
SRR15311248	Williams82	root	36	7days
SRR15311249	Williams82	root	37	7days
SRR15311250	Williams82	root	38	12days
SRR15311251	Williams82	root	39	12days
SRR15311252	Williams82	root	40	12days
SRR15311253	Williams82	root	41	12days
SRR15311254	Williams82	root	42	12days
SRR15311255	Williams82	root	43	12days
SRR15311256	Williams82	root	44	12days
SRR15311257	Williams82	root	45	12days
SRR15311258	Williams82	root	46	7days
SRR15311259	Williams82	root	47	12days
SRR15311260	Williams82	root	48	12days
SRR15311261	Williams82	root	49	12days
SRR15311262	Williams82	root	50	17day
SRR15311263	Williams82	root	51	17day
SRR15311264	Williams82	root	52	17days
SRR15311265	Williams82	root	53	17days
SRR15311266	Williams82	root	54	17days
SRR15311267	Williams82	root	55	17day
SRR15311268	Williams82	root	56	17days
SRR15311269	Williams82	root	57	7days
SRR15311270	Williams82	root	58	17days
SRR15311271	Williams82	root	59	17days
SRR15311272	Williams82	root	60	17days
SRR15311273	Williams82	root	61	17days
SRR15311274	Williams82	root	62	17days
SRR15311275	Williams82	root	63	7days
SRR15311276	Williams82	root	64	7days
SRR15311277	Williams82	root	65	7days
SRR15311278	Williams82	root	66	7days
SRR15311279	Williams82	root	67	7days
SRR15311280	Williams82	root	68	7days
SRR15311281	Williams82	root	69	7days
SRR15506176	Williams 82	leaf	70	20 days after emergence
SRR15506177	Williams 82	leaf	71	20 days after emergence

## Sheet: S10
Supplementary Table S10. GWAS Candidates (GC) genes Overlapping Expressed Root Genes
GWAS SNP	Model	Trait	P value	SNP Start	SNP End	Soy gene ID	Chromosome	geneID start	geneID stop	Strand	Gene distance	Gene Ontology	Best hit At Gene	At Gene Symbol	At define	At description	RNAexpr_Root	Cell_counts	Cell_Type_List	Color	Tissue
Gm06_17855981	Medians_Blink	Biomass_area	0	17855980	17855982	Glyma.06G197300	Gm06	17858853	17861476	-	2871	GO:0045905;GO:0045901;GO:0043022;GO:0006452;GO:0003746;GO:0003723	AT1G13950	ATELF5A-1;EIF-5A;EIF5A;ELF5A-1	eukaryotic_elongation_factor_5A-1	Encodes eukaryotic translation initiation factor 5A (EIF-5A).In mammalian cells it functions as a shuttle protein that translocates mRNA from the nucleus to cytoplasmic ribosomes. Overexpression results in an increase in both primary and secondary xylem formation. In RNAi suppressed lines, xylem formation is reduced. protein_coding EUKARYOTIC ELONGATION FACTOR 5A-1 (ELF5A-1) (EIF-5A);EUKARYOTIC E…	TRUE	10	Cortex, Pericycle, Vascular bundle/Xylem pole pericycle, Stele, Endodermis, Epidermis, Xylem, Vascular bundle, Metaphloem, Cluster13	brown	Leaf
Gm06_17855981	Medians_Blink	Biomass_area	0	17855980	17855982	Glyma.06G197600	Gm06	17908489	17912658	+	52507	GO:0005515;GO:0006468;GO:0005524;GO:0004672	AT1G74360		Leucine-rich_repeat_protein_kinase_family_protein	NILR1 encodes a serine/threonine kinase involved in defense response to nematodes. protein_coding NEMATODE-INDUCED LRR-RLK 1 (NILR1) GERMINATION REPRESSION AND CELL EXPANSION RECEPTOR-LIKE KINASE (GRACE);NEMATODE-INDUCED LRR-RLK 1 (NILR1)	TRUE	10	Cortex, Pericycle, Vascular bundle/Xylem pole pericycle, Stele, Endodermis, Epidermis, Xylem, Vascular bundle, Metaphloem, Cluster13	turquoise	Root
Gm06_17855981	Medians_Blink	Biomass_area	0	17855980	17855982	Glyma.06G198401	Gm06	18004430	18004597	-	148448		AT2G47500		P-loop_nucleoside_triphosphate_hydrolases_superfamily_protein_with_CH_(Calponin_Homology)_domain	P-loop nucleoside triphosphate hydrolases superfamily protein with CH (Calponin Homology) domain-containing protein;(source:Araport11) protein_coding	TRUE			turquoise	Root
Gm19_36670574	Medians_Blink	Biomass_area	0	36670573	36670575	Glyma.19G109100	Gm19	36711051	36714395	+	40476	GO:0006355;GO:0003677	AT5G18270	ANAC087	Arabidopsis_NAC_domain_containing_protein_87	NAC domain containing protein 87;(source:Araport11) protein_coding ARABIDOPSIS NAC DOMAIN CONTAINING PROTEIN 87 (ANAC087) ARABIDOPSIS NAC DOMAIN CONTAINING PROTEIN 87 (ANAC087)	TRUE	10	Cortex, Pericycle, Vascular bundle/Xylem pole pericycle, Stele, Endodermis, Epidermis, Xylem, Vascular bundle, Metaphloem, Cluster13	brown	Leaf
Gm19_36670574	Medians_Blink	Biomass_area	0	36670573	36670575	Glyma.19G110100	Gm19	36872623	36873965	-	202048						TRUE	1	Cluster13	turquoise	Root
Gm10_45938997	Medians_Blink	Convex_hull_area	0	45938996	45938998	Glyma.10G227700	Gm10	45892692	45893890	+	-45107	GO:0005975;GO:0004553	AT5G24090	ATCHIA;CHIA	chitinase_A	Chitinase A (class III) expressed exclusively under environmental stress conditions. Shown be a plant lysozyme involved in plant immunity. protein_coding CHITINASE A (CHIA) CHITINASE A (ATCHIA);LYSOZYME 1 (LYS1);CHITINASE A (CHIA)	TRUE	8	Cortex, Pericycle, Vascular bundle/Xylem pole pericycle, Stele, Endodermis, Epidermis, Xylem, Metaphloem	yellow	Root
Gm10_45938997	Medians_Blink	Convex_hull_area	0	45938996	45938998	Glyma.10G229300	Gm10	45997972	46002023	-	58974	GO:0055085;GO:0016021;GO:0008308;GO:0006873	AT5G24030	SLAH3	SLAC1_homologue_3	Encodes a protein with ten predicted transmembrane helices. The SLAH3 protein has similarity to the SLAC1 protein involved in ion homeostasis in guard cells. Although it is not expressed in guard cells, it can complement an slac1-2 mutant suggesting that it performs a similar function. SLAH3:GFP localizes to the plasma membrane. protein_coding SLAC1 HOMOLOGUE 3 (SLAH3) SLAC1 HOMOLOGUE 3 (SLAH3)	TRUE	8	Cortex, Pericycle, Vascular bundle/Xylem pole pericycle, Stele, Endodermis, Epidermis, Xylem, Cluster13	turquoise	Root
Gm10_45938997	Medians_Blink	Convex_hull_area	0	45938996	45938998	Glyma.10G227400	Gm10	45863495	45871591	+	-67406	GO:0055085;GO:0042626;GO:0016021;GO:0006810;GO:0005524;GO:0016887	AT3G59140	ATMRP14;MRP14	multidrug_resistance-associated_protein_14	member of MRP subfamily protein_coding ATP-BINDING CASSETTE C10 (ABCC10) MULTIDRUG RESISTANCE-ASSOCIATED PROTEIN 14 (ATMRP14);ATP-BINDING CASSETTE C10 (ABCC10);MULTIDRUG RESISTANCE-ASSOCIATED PROTEIN 14 (MRP14)	TRUE	10	Cortex, Pericycle, Vascular bundle/Xylem pole pericycle, Stele, Endodermis, Epidermis, Xylem, Vascular bundle, Metaphloem, Cluster13	turquoise	Root
Gm09_47116003	Medians_Blink	Dry_root_mass	0	47116002	47116004	Glyma.09G245100	Gm09	47115295	47115450	+	-553						TRUE			turquoise	Root
Gm09_47116003	Medians_Blink	Dry_root_mass	0	47116002	47116004	Glyma.09G244800	Gm09	47093515	47098228	+	-17775		AT2G44140		Peptidase_family_C54_protein	Autophagy protein that cleaves ATG8s. protein_coding AUTOPHAGY 4A (ATG4A) AUTOPHAGY 4A (ATG4A)	TRUE	9	Cortex, Pericycle, Vascular bundle/Xylem pole pericycle, Stele, Endodermis, Epidermis, Xylem, Vascular bundle, Metaphloem	turquoise	Root
Gm09_47116003	Medians_Blink	Dry_root_mass	0	47116002	47116004	Glyma.09G244700	Gm09	47084878	47089897	-	-26106		AT5G23520		smr_(Small_MutS_Related)_domain-containing_protein	smr (Small MutS Related) domain-containing protein;(source:Araport11) protein_coding	TRUE	10	Cortex, Pericycle, Vascular bundle/Xylem pole pericycle, Stele, Endodermis, Epidermis, Xylem, Vascular bundle, Metaphloem, Cluster13	turquoise	Root
Gm09_47116003	Medians_Blink	Dry_root_mass	0	47116002	47116004	Glyma.09G244501	Gm09	47077639	47077842	-	-38161						TRUE			turquoise	Root
Gm09_47116003	Medians_Blink	Dry_root_mass	0	47116002	47116004	Glyma.09G245800	Gm09	47164454	47165775	+	48450		AT4G17800		Predicted_AT-hook_DNA-binding_family_protein	Putative AT-hook DNA-binding family protein;(source:Araport11) protein_coding AT-HOOK MOTIF NUCLEAR LOCALIZED PROTEIN 23 (AHL23) AT-HOOK MOTIF NUCLEAR LOCALIZED PROTEIN 23 (AHL23)	TRUE	10	Cortex, Pericycle, Vascular bundle/Xylem pole pericycle, Stele, Endodermis, Epidermis, Xylem, Vascular bundle, Metaphloem, Cluster13	turquoise	Root
Gm11_31034808	Medians_Blink	Width	0	31034807	31034809	Glyma.11G176301	Gm11	31054276	31057109	+	19467	GO:0005515;GO:0006468;GO:0005524;GO:0004672	AT2G26730		Leucine-rich_repeat_protein_kinase_family_protein	Leucine-rich repeat protein kinase family protein;(source:Araport11) protein_coding	TRUE	6	Cortex, Pericycle, Vascular bundle/Xylem pole pericycle, Stele, Endodermis, Epidermis	turquoise	Root
Gm11_31034808	Medians_Blink	Width	0	31034807	31034809	Glyma.11G176302	Gm11	31203782	31207299	-	168973	GO:0022857;GO:0016021	AT3G28050		nodulin_MtN21_/EamA-like_transporter_family_protein	nodulin MtN21-like transporter family protein protein_coding USUALLY MULTIPLE ACIDS MOVE IN AND OUT TRANSPORTERS 41 (UMAMIT41) USUALLY MULTIPLE ACIDS MOVE IN AND OUT TRANSPORTERS 41 (UMAMIT41)	TRUE	10	Cortex, Pericycle, Vascular bundle/Xylem pole pericycle, Stele, Endodermis, Epidermis, Xylem, Vascular bundle, Metaphloem, Cluster13	turquoise	Root
Gm11_31034808	Medians_Blink	Width	0	31034807	31034809	Glyma.11G176307	Gm11	31247597	31248464	-	212788	GO:0055114;GO:0020037;GO:0016705;GO:0005506	AT1G12740	CYP87A2	cytochrome_P450;_family_87;_subfamily_A;_polypeptide_2	encodes a protein with cytochrome P450 domain protein_coding CYTOCHROME P450, FAMILY 87, SUBFAMILY A, POLYPEPTIDE 2 (CYP87A2) CYTOCHROME P450, FAMILY 87, SUBFAMILY A, POLYPEPTIDE 2 (CYP87A2)	TRUE			turquoise	Root
Gm09_7083962	Medians_Blink	lr_length	0	7083961	7083963	Glyma.09G069900	Gm09	7076526	7080338	+	-3624	GO:0006468;GO:0004672	AT2G05940		Protein_kinase_superfamily_protein	Encodes a receptor-like cytoplasmic kinase that phosphorylates the host target RIN4, leading to the activation of a plant innate immune receptor RPM1. protein_coding RPM1-INDUCED PROTEIN KINASE (RIPK) PBS1-LIKE 14 (PBL14);RPM1-INDUCED PROTEIN KINASE (RIPK)	TRUE	6	Cortex, Pericycle, Stele, Endodermis, Epidermis, Cluster13	yellow	Root
Gm09_7083962	Medians_Blink	lr_length	0	7083961	7083963	Glyma.09G070100	Gm09	7110815	7114565	-	26852	GO:0007186;GO:0005834;GO:0004871	AT5G20635			Encodes an atypical heterotrimeric G-protein gamma-subunit involved in guard cell K+-channel regulation and morphological development. protein_coding ARABIDOPSIS G PROTEIN GAMMA SUBUNIT 3 (AGG3) ARABIDOPSIS G PROTEIN GAMMA SUBUNIT 3 (AGG3)	TRUE	9	Cortex, Pericycle, Vascular bundle/Xylem pole pericycle, Stele, Epidermis, Xylem, Vascular bundle, Metaphloem, Cluster13	turquoise	Root
Gm09_7083962	Medians_Blink	lr_length	0	7083961	7083963	Glyma.09G070200	Gm09	7116273	7117991	+	32310		AT2G05910		Protein_of_unknown_function_(DUF567)	LURP-one-like protein (DUF567);(source:Araport11) protein_coding	TRUE	5	Cortex, Pericycle, Stele, Epidermis, Vascular bundle	turquoise	Root
Gm09_7083962	Medians_Blink	lr_length	0	7083961	7083963	Glyma.09G069700	Gm09	7040977	7046513	-	-37449		AT2G06005	FIP1	FRIGIDA_interacting_protein_1	Encodes one of the FRI interacting proteins: FRIGIDA INTERACTING PROTEIN 1 (FIP1)/At2g06005, FIP2/ At4g17060. FRI (At4G00650) is a major determinant of natural variation in Arabidopsis flowering time. protein_coding FRIGIDA INTERACTING PROTEIN 1 (FIP1) FRIGIDA INTERACTING PROTEIN 1 (FIP1)	TRUE	10	Cortex, Pericycle, Vascular bundle/Xylem pole pericycle, Stele, Endodermis, Epidermis, Xylem, Vascular bundle, Metaphloem, Cluster13	turquoise	Root
Gm09_7083962	Medians_Blink	lr_length	0	7083961	7083963	Glyma.09G070300	Gm09	7137689	7143865	+	53726	GO:0055114;GO:0016491;GO:0008152	AT1G54100	ALDH7B4	aldehyde_dehydrogenase_7B4	Aldehyde dehydrogenase protein_coding ALDEHYDE DEHYDROGENASE 7B4 (ALDH7B4) ALDEHYDE DEHYDROGENASE 7B4 (ALDH7B4)	TRUE	10	Cortex, Pericycle, Vascular bundle/Xylem pole pericycle, Stele, Endodermis, Epidermis, Xylem, Vascular bundle, Metaphloem, Cluster13	turquoise	Root
Gm09_7083962	Medians_Blink	lr_length	0	7083961	7083963	Glyma.09G069500	Gm09	7018553	7021936	-	-62026	GO:0008080	AT2G06025		Acyl-CoA_N-acyltransferases_(NAT)_superfamily_protein	Acyl-CoA N-acyltransferases (NAT) superfamily protein;(source:Araport11) protein_coding GCN5&amp;#8208;RELATED N&amp;#8208;ACETYLTRANSFERASE 6 (GNAT6) GCN5&amp;#8208;RELATED N&amp;#8208;ACETYLTRANSFERASE 6 (GNAT6)	TRUE	10	Cortex, Pericycle, Vascular bundle/Xylem pole pericycle, Stele, Endodermis, Epidermis, Xylem, Vascular bundle, Metaphloem, Cluster13	turquoise	Root
Gm09_7083962	Medians_Blink	lr_length	0	7083961	7083963	Glyma.09G070600	Gm09	7157459	7160951	-	73496		AT4G35740	ATRECQ3;RecQl3	DEAD/DEAH_box_RNA_helicase_family_protein_	Encodes RECQ3, an ATP-dependent helicase. protein_coding (RecQl3) A. THALIANA RECQ HELICASE 3 (ATRECQ3); (RecQl3)	TRUE	9	Cortex, Pericycle, Vascular bundle/Xylem pole pericycle, Stele, Endodermis, Epidermis, Xylem, Vascular bundle, Cluster13	turquoise	Root
Gm09_7083962	Medians_Blink	lr_length	0	7083961	7083963	Glyma.09G070700	Gm09	7173910	7178014	-	89947	GO:0044237	AT2G05830		NagB/RpiA/CoA_transferase-like_superfamily_protein	Encodes a 5-methylthioribose-1-phosphate isomerase. protein_coding 5-METHYLTHIORIBOSE KINASE 1 (MTI1) 5-METHYLTHIORIBOSE-1-PHOSPHATE-ISOMERASE1 (MTI1);5-METHYLTHIORIBOSE KINASE 1 (MTI1)	TRUE	10	Cortex, Pericycle, Vascular bundle/Xylem pole pericycle, Stele, Endodermis, Epidermis, Xylem, Vascular bundle, Metaphloem, Cluster13	turquoise	Root
Gm12_26099549	Medians_Blink	pr_length	0	26099548	26099550	Glyma.12G158000	Gm12	26129136	26137776	+	29586	GO:0003677	AT3G18380		sequence-specific_DNA_binding_transcription_factors;sequence-specific_DNA_binding	DNA-BINDING TRANSCRIPTION FACTOR 2;(source:Araport11) protein_coding SAWADEE HOMEODOMAIN HOMOLOG 2 (SHH2) DNA-BINDING TRANSCRIPTION FACTOR 2 (DTF2);SAWADEE HOMEODOMAIN HOMOLOG 2 (SHH2)	TRUE	10	Cortex, Pericycle, Vascular bundle/Xylem pole pericycle, Stele, Endodermis, Epidermis, Xylem, Vascular bundle, Metaphloem, Cluster13	turquoise	Root
Gm12_26099549	Medians_Blink	pr_length	0	26099548	26099550	Glyma.12G157700	Gm12	25809106	25827199	-	-272350	GO:0008270;GO:0003677	AT3G14890		phosphoesterase	Encodes a base excision repair protein that, together with APE2, it plays overlapping roles in the maintenance of epigenome and genome stability in plants. protein_coding ZINC 4 FINGER DNA 3-PHOSPHOESTERASE (ZDP) ZINC 4 FINGER DNA 3-PHOSPHOESTERASE (ZDP)	TRUE	10	Cortex, Pericycle, Vascular bundle/Xylem pole pericycle, Stele, Endodermis, Epidermis, Xylem, Vascular bundle, Metaphloem, Cluster13	blue	Leaf
Gm02_45524181	Medians_Blink	pr_tip_depth	0	45524180	45524182	Glyma.02G249300	Gm02	45511996	45514666	-	-9515	GO:0016746;GO:0008152	AT3G11430	ATGPAT5;GPAT5	glycerol-3-phosphate_acyltransferase_5	sn-glycerol-3-phosphate 2-O-acyltransferas, involved in the biosynthesis of suberin polyester. protein_coding GLYCEROL-3-PHOSPHATE SN-2-ACYLTRANSFERASE 5 (GPAT5) GLYCEROL-3-PHOSPHATE SN-2-ACYLTRANSFERASE 5 (GPAT5);GLYCEROL-3-PHOSPHATE SN-2-ACYLTRANSFERASE 5 (ATGPAT5)	TRUE	2	Vascular bundle/Xylem pole pericycle, Endodermis	turquoise	Root
Gm02_45524181	Medians_Blink	pr_tip_depth	0	45524180	45524182	Glyma.02G249500	Gm02	45534384	45536929	-	10202		AT5G02140		Pathogenesis-related_thaumatin_superfamily_protein	Pollen expressed thaumatin like protein. protein_coding (GCTLP1) (GCTLP1)	TRUE	8	Cortex, Pericycle, Vascular bundle/Xylem pole pericycle, Stele, Endodermis, Epidermis, Metaphloem, Cluster13	brown	Leaf
Gm02_45524181	Medians_Blink	pr_tip_depth	0	45524180	45524182	Glyma.02G248700	Gm02	45432516	45438395	-	-85786	GO:0031011;GO:0006355;GO:0006281	AT3G12380	ARP5;ATARP5	actin-related_protein_5	Encodes a gene similar to actin-related proteins in other organisms. Member of nuclear ARP gene family. protein_coding ACTIN-RELATED PROTEIN 5 (ARP5) ACTIN-RELATED PROTEIN 5 (ARP5)	TRUE	10	Cortex, Pericycle, Vascular bundle/Xylem pole pericycle, Stele, Endodermis, Epidermis, Xylem, Vascular bundle, Metaphloem, Cluster13	blue	Leaf
Gm06_35340939	Medians_Blink	pr_tip_depth	0	35340938	35340940	Glyma.06G230300	Gm06	35231197	35236642	+	-104297		AT1G16890	UBC13B;UBC36	ubiquitin-conjugating_enzyme_36	UBC36/UBC13B encodes a protein that may play a role in DNA damage responses and error-free post-replicative DNA repair. It can bind to the MMZ/UEV1 proteins in vitro. protein_coding UBIQUITIN-CONJUGATING ENZYME 36 (UBC36) (ATUBC36);UBIQUITIN-CONJUGATING ENZYME 36 (UBC36)	TRUE	10	Cortex, Pericycle, Vascular bundle/Xylem pole pericycle, Stele, Endodermis, Epidermis, Xylem, Vascular bundle, Metaphloem, Cluster13	turquoise	Root
Gm06_35340939	Medians_Blink	pr_tip_depth	0	35340938	35340940	Glyma.06G231100	Gm06	35459593	35459778	+	118653						TRUE			turquoise	Root
Gm06_35340939	Medians_Blink	pr_tip_depth	0	35340938	35340940	Glyma.06G231200	Gm06	35475420	35480946	+	134480		AT2G31130			hypothetical protein;(source:Araport11) protein_coding	TRUE	7	Cortex, Pericycle, Vascular bundle/Xylem pole pericycle, Stele, Endodermis, Epidermis, Xylem	turquoise	Root
Gm06_35340939	Medians_Blink	pr_tip_depth	0	35340938	35340940	Glyma.06G231300	Gm06	35479648	35484637	-	138708		AT1G73140	TBL31	Plant_protein_of_unknown_function_(DUF828)	Encodes a member of the TBL (TRICHOME BIREFRINGENCE-LIKE) gene family containing a plant-specific DUF231 (domain of unknown function) domain. TBL gene family has 46 members, two of which (TBR/AT5G06700 and TBL3/AT5G01360) have been shown to be involved in the synthesis and deposition of secondary wall cellulose, presumably by influencing the esterification state of pectic polymers. A nomenclature…	TRUE	5	Cortex, Pericycle, Vascular bundle/Xylem pole pericycle, Endodermis, Vascular bundle	turquoise	Root
Gm07_35512631	Medians_Blink	pr_tip_depth	0	35512630	35512632	Glyma.07G184000	Gm07	35507607	35510798	-	-1833	GO:0006468;GO:0005524;GO:0004672;GO:0030246	AT5G10530		Concanavalin_A-like_lectin_protein_kinase_family_protein	Concanavalin A-like lectin protein kinase family protein;(source:Araport11) protein_coding L-TYPE LECTIN RECEPTOR KINASE IX.1 (LECRK-IX.1) L-TYPE LECTIN RECEPTOR KINASE IX.1 (LECRK-IX.1)	TRUE	10	Cortex, Pericycle, Vascular bundle/Xylem pole pericycle, Stele, Endodermis, Epidermis, Xylem, Vascular bundle, Metaphloem, Cluster13	turquoise	Root
Gm07_35512631	Medians_Blink	pr_tip_depth	0	35512630	35512632	Glyma.07G183600	Gm07	35484102	35490752	-	-21879	GO:0055114;GO:0016491;GO:0008152	AT2G14170	ALDH6B2	aldehyde_dehydrogenase__6B2	Arabidopsis thaliana methylmalonate-semialdehyde dehydrogenase protein_coding ALDEHYDE DEHYDROGENASE 6B2 (ALDH6B2) (MMSD);ALDEHYDE DEHYDROGENASE 6B2 (ALDH6B2)	TRUE	10	Cortex, Pericycle, Vascular bundle/Xylem pole pericycle, Stele, Endodermis, Epidermis, Xylem, Vascular bundle, Metaphloem, Cluster13	turquoise	Root
Gm07_35512631	Medians_Blink	pr_tip_depth	0	35512630	35512632	Glyma.07G184700	Gm07	35576357	35578840	-	63725	GO:0055114;GO:0050661;GO:0033014;GO:0008883	AT1G58290	HEMA1	Glutamyl-tRNA_reductase_family_protein	Encodes a protein with glutamyl-tRNA reductase (GluTR) activity, catalyzing the NADPH-dependent reduction of Glu-tRNA(Glu) to glutamate 1-semialdehyde (GSA) with the release of free tRNA(Glu). It is involved in the early steps of chlorophyll biosynthesis. protein_coding (HEMA1) GLUTAMYL-TRNA REDUCTASE (GLUTR);ARABIDOPSIS THALIANA HEMA 1 (AtHEMA1); (HEMA1)	TRUE	10	Cortex, Pericycle, Vascular bundle/Xylem pole pericycle, Stele, Endodermis, Epidermis, Xylem, Vascular bundle, Metaphloem, Cluster13	yellow	Root
Gm07_35512631	Medians_Blink	pr_tip_depth	0	35512630	35512632	Glyma.07G184900	Gm07	35599788	35607788	+	87156	GO:0016020;GO:0006810;GO:0005215	AT5G64500		Major_facilitator_superfamily_protein	Major facilitator superfamily protein protein_coding	TRUE	10	Cortex, Pericycle, Vascular bundle/Xylem pole pericycle, Stele, Endodermis, Epidermis, Xylem, Vascular bundle, Metaphloem, Cluster13	turquoise	Root
Gm07_44928572	Medians_Blink	pr_tip_depth	0	44928571	44928573	Glyma.07G274100	Gm07	44907304	44913713	-	-14859		AT5G08565		Transcription_initiation_Spt4-like_protein	Transcription initiation Spt4-like protein;(source:Araport11) protein_coding (SPT4-1) (SPT4-1)	TRUE	9	Cortex, Pericycle, Vascular bundle/Xylem pole pericycle, Stele, Endodermis, Epidermis, Xylem, Vascular bundle, Metaphloem	turquoise	Root
Gm07_44928572	Medians_Blink	pr_tip_depth	0	44928571	44928573	Glyma.07G272500	Gm07	44783513	44787057	-	-141515	GO:0006397;GO:0005737;GO:0005634;GO:0003723	AT2G02570		nucleic_acid_binding;RNA_binding	Similar to SPF30 splicing factor. Under circadian control. Mutants have defects in alternative splicing and show more intron retention compared to wt. protein_coding SPLICING FACTOR 30 (SPF30) SPLICING FACTOR 30 (SPF30)	TRUE	10	Cortex, Pericycle, Vascular bundle/Xylem pole pericycle, Stele, Endodermis, Epidermis, Xylem, Vascular bundle, Metaphloem, Cluster13	turquoise	Root
Gm07_44928572	Medians_Blink	pr_tip_depth	0	44928571	44928573	Glyma.07G272200	Gm07	44760843	44765169	-	-163403		AT5G49820	EMB1879;RUS6	Protein_of_unknown_function;_DUF647	root UVB sensitive protein (Protein of unknown function, DUF647);(source:Araport11) protein_coding ROOT UV-B SENSITIVE 6 (RUS6) EMBRYO DEFECTIVE 1879 (emb1879);ROOT UV-B SENSITIVE 6 (RUS6)	TRUE	10	Cortex, Pericycle, Vascular bundle/Xylem pole pericycle, Stele, Endodermis, Epidermis, Xylem, Vascular bundle, Metaphloem, Cluster13	turquoise	Root
Gm09_17696953	Medians_Blink	pr_tip_depth	0	17696952	17696954	Glyma.09G099900	Gm09	17523813	17544179	+	-152774	GO:0006468;GO:0004672	AT1G56130		Leucine-rich_repeat_transmembrane_protein_kinase	Leucine-rich repeat transmembrane protein kinase;(source:Araport11) protein_coding	TRUE	10	Cortex, Pericycle, Vascular bundle/Xylem pole pericycle, Stele, Endodermis, Epidermis, Xylem, Vascular bundle, Metaphloem, Cluster13	turquoise	Root
Gm09_17696953	Medians_Blink	pr_tip_depth	0	17696952	17696954	Glyma.09G099500	Gm09	17483088	17489265	+	-207688	GO:0055085;GO:0016021;GO:0008324;GO:0006812	AT1G16310		Cation_efflux_family_protein	Cation efflux family protein which affects ABA-JA crosstalk and susceptibility to Mamestra brassicae herbivory. protein_coding METAL-TOLERANCE PROTEIN 10 (MTP10) METAL-TOLERANCE PROTEIN 10 (MTP10)	TRUE	10	Cortex, Pericycle, Vascular bundle/Xylem pole pericycle, Stele, Endodermis, Epidermis, Xylem, Vascular bundle, Metaphloem, Cluster13	turquoise	Root
Gm09_17696953	Medians_Blink	pr_tip_depth	0	17696952	17696954	Glyma.09G099600	Gm09	17484190	17484822	+	-212131						TRUE	9	Cortex, Pericycle, Vascular bundle/Xylem pole pericycle, Stele, Endodermis, Epidermis, Xylem, Vascular bundle, Metaphloem	turquoise	Root
Gm18_51895181	Medians_Blink	pr_tip_depth	0	51895180	51895182	Glyma.18G227000	Gm18	51905562	51906586	+	10380						TRUE			turquoise	Root
Gm18_51895181	Medians_Blink	pr_tip_depth	0	51895180	51895182	Glyma.18G227100	Gm18	51909689	51914173	+	14507		AT4G00755		F-box_family_protein	F-box family protein;(source:Araport11) protein_coding	TRUE	10	Cortex, Pericycle, Vascular bundle/Xylem pole pericycle, Stele, Endodermis, Epidermis, Xylem, Vascular bundle, Metaphloem, Cluster13	turquoise	Root
Gm18_51895181	Medians_Blink	pr_tip_depth	0	51895180	51895182	Glyma.18G227400	Gm18	51932732	51936508	-	37550	GO:0005515	AT2G45720		ARM_repeat_superfamily_protein	ARM repeat superfamily protein;(source:Araport11) protein_coding	TRUE	9	Cortex, Pericycle, Vascular bundle/Xylem pole pericycle, Stele, Endodermis, Epidermis, Xylem, Vascular bundle, Cluster13	turquoise	Root
Gm18_51895181	Medians_Blink	pr_tip_depth	0	51895180	51895182	Glyma.18G226500	Gm18	51789556	51832726	+	-62455	GO:0005515;GO:0043531	AT1G61190		LRR_and_NB-ARC_domains-containing_disease_resistance_protein	Putative CC-NB-LRR resistance gene. Its ortholog in ecotype Wei-0 RPP39 (R_190-Wei-0, accession number JQ045573, PMID:22359513) has been shown experimentally to recognize the effector ATR39-1 produced by Hyaloperonospora arabidopsidis (Hpa). The mRNA is cell-to-cell mobile. protein_coding RESISTANCE TO PERONOSPORA PARASITICA 39 (RPP39)	TRUE	10	Cortex, Pericycle, Vascular bundle/Xylem pole pericycle, Stele, Endodermis, Epidermis, Xylem, Vascular bundle, Metaphloem, Cluster13	turquoise	Root
Gm18_51895181	Medians_Blink	pr_tip_depth	0	51895180	51895182	Glyma.18G226400	Gm18	51783147	51786175	-	-109006		AT5G01150		Protein_of_unknown_function_(DUF674)	hypothetical protein (DUF674);(source:Araport11) protein_coding	TRUE	10	Cortex, Pericycle, Vascular bundle/Xylem pole pericycle, Stele, Endodermis, Epidermis, Xylem, Vascular bundle, Metaphloem, Cluster13	turquoise	Root
Gm02_38012571	Medians_FarmCPU	Biomass_area	0	38012570	38012572	Glyma.02G192300	Gm02	38195269	38201013	+	182697	GO:0008270;GO:0005515	AT5G22000	RHF2A	RING-H2_group_F2A	encodes a RING-type E3 ubiquitin ligase implicated in gametogenesis. Double mutant analyses with RHF1a suggests that RHF2a may be involved in targetting ICK4KRP6 for degradation following meiosis in order to allow the mitoses associated with megagametogenesis and microgametogenesis to occur. RHF2a is expressed in all four floral whorls and is present at ~8-fold higher levels than RHF1a in inflore…	TRUE	10	Cortex, Pericycle, Vascular bundle/Xylem pole pericycle, Stele, Endodermis, Epidermis, Xylem, Vascular bundle, Metaphloem, Cluster13	blue	Leaf
Gm02_38012571	Medians_FarmCPU	Biomass_area	0	38012570	38012572	Glyma.02G190900	Gm02	37826935	37827758	+	-184813		AT5G40690			histone-lysine N-methyltransferase trithorax-like protein;(source:Araport11) protein_coding	TRUE	7	Cortex, Pericycle, Vascular bundle/Xylem pole pericycle, Stele, Endodermis, Epidermis, Cluster13	yellow	Root
Gm06_17855981	Medians_FarmCPU	Biomass_area	0	17855980	17855982	Glyma.06G197300	Gm06	17858853	17861476	-	2871	GO:0045905;GO:0045901;GO:0043022;GO:0006452;GO:0003746;GO:0003723	AT1G13950	ATELF5A-1;EIF-5A;EIF5A;ELF5A-1	eukaryotic_elongation_factor_5A-1	Encodes eukaryotic translation initiation factor 5A (EIF-5A).In mammalian cells it functions as a shuttle protein that translocates mRNA from the nucleus to cytoplasmic ribosomes. Overexpression results in an increase in both primary and secondary xylem formation. In RNAi suppressed lines, xylem formation is reduced. protein_coding EUKARYOTIC ELONGATION FACTOR 5A-1 (ELF5A-1) (EIF-5A);EUKARYOTIC E…	TRUE	10	Cortex, Pericycle, Vascular bundle/Xylem pole pericycle, Stele, Endodermis, Epidermis, Xylem, Vascular bundle, Metaphloem, Cluster13	brown	Leaf
Gm06_17855981	Medians_FarmCPU	Biomass_area	0	17855980	17855982	Glyma.06G197600	Gm06	17908489	17912658	+	52507	GO:0005515;GO:0006468;GO:0005524;GO:0004672	AT1G74360		Leucine-rich_repeat_protein_kinase_family_protein	NILR1 encodes a serine/threonine kinase involved in defense response to nematodes. protein_coding NEMATODE-INDUCED LRR-RLK 1 (NILR1) GERMINATION REPRESSION AND CELL EXPANSION RECEPTOR-LIKE KINASE (GRACE);NEMATODE-INDUCED LRR-RLK 1 (NILR1)	TRUE	10	Cortex, Pericycle, Vascular bundle/Xylem pole pericycle, Stele, Endodermis, Epidermis, Xylem, Vascular bundle, Metaphloem, Cluster13	turquoise	Root
Gm06_17855981	Medians_FarmCPU	Biomass_area	0	17855980	17855982	Glyma.06G198401	Gm06	18004430	18004597	-	148448		AT2G47500		P-loop_nucleoside_triphosphate_hydrolases_superfamily_protein_with_CH_(Calponin_Homology)_domain	P-loop nucleoside triphosphate hydrolases superfamily protein with CH (Calponin Homology) domain-containing protein;(source:Araport11) protein_coding	TRUE			turquoise	Root
Gm14_38117630	Medians_FarmCPU	Biomass_area	0	38117629	38117631	Glyma.14G160100	Gm14	37857725	37860537	-	-257093		AT5G53190		Nodulin_MtN3_family_protein	Nodulin MtN3 family protein;(source:Araport11) protein_coding (SWEET3) (AtSWEET3); (SWEET3)	TRUE	10	Cortex, Pericycle, Vascular bundle/Xylem pole pericycle, Stele, Endodermis, Epidermis, Xylem, Vascular bundle, Metaphloem, Cluster13	turquoise	Root
Gm19_28102691	Medians_FarmCPU	Biomass_area	0	28102690	28102692	Glyma.19G076700	Gm19	28168167	28169335	+	65475	GO:0016021	AT5G14280		DNA-binding_storekeeper_protein-related	DNA-binding storekeeper-like protein;(source:Araport11) protein_coding GEBP-LIKE PROTEIN 2 (GPL2) GEBP-LIKE PROTEIN 2 (GPL2)	TRUE	7	Cortex, Pericycle, Vascular bundle/Xylem pole pericycle, Stele, Endodermis, Epidermis, Xylem	turquoise	Root
Gm19_28102691	Medians_FarmCPU	Biomass_area	0	28102690	28102692	Glyma.19G076800	Gm19	28175571	28185259	-	72879		AT5G40780	LHT1	lysine_histidine_transporter_1	Encodes LHT1 (lysine histidine transporter), a high-affinity transporter for cellular amino acid uptake in both root epidermis and leaf mesophyll. protein_coding LYSINE HISTIDINE TRANSPORTER 1 (LHT1) (LHT1); (ATLHT1);LYSINE HISTIDINE TRANSPORTER 1 (LHT1)	TRUE	1	Vascular bundle/Xylem pole pericycle	yellow	Root
Gm19_28102691	Medians_FarmCPU	Biomass_area	0	28102690	28102692	Glyma.19G076901	Gm19	28208458	28209387	+	105766						TRUE	5	Cortex, Pericycle, Vascular bundle/Xylem pole pericycle, Stele, Endodermis	turquoise	Root
Gm19_28102691	Medians_FarmCPU	Biomass_area	0	28102690	28102692	Glyma.19G075700	Gm19	27883555	27890969	+	-211722	GO:0005515	AT5G14250	COP13;CSN3;FUS11	Proteasome_component_(PCI)_domain_protein	Encodes subunit 3 of the COP9 signalosome. protein_coding CONSTITUTIVE PHOTOMORPHOGENIC 13 (COP13) CONSTITUTIVE PHOTOMORPHOGENIC 13 (COP13);FUSCA 11 (FUS11);COP9 SIGNALOSOME SUBUNIT 3 (CSN3)	TRUE	10	Cortex, Pericycle, Vascular bundle/Xylem pole pericycle, Stele, Endodermis, Epidermis, Xylem, Vascular bundle, Metaphloem, Cluster13	turquoise	Root
[truncated: 95 more rows]

[truncated: 7 more sheets: S11, S12, S13, S14, S15, S16, S17]
